# Supplementary material
Source: PubMed Central journal article supplement (PMC10269371)
Supplement: NIHMS1784864-supplement-Supplementary_Material.pdf [file NIHMS1784864-supplement-Supplementary_Material.pdf]

## ***Supporting Information***

### **Antibacterial and Antiproliferative Polyketides, Diketopiperazine and Isochromanone from a Marine-derived Fungal Strain *Fusarium graminearum* FM1010 in Hawaii**

KH Ahammad Uz Zaman<sup>a</sup>, Ariel M. Sarotti<sup>b</sup>, Xiaohua Wu<sup>a</sup>, Lela DeVine<sup>c</sup>, Shugeng Cao,<sup>a,\*</sup>

<sup>a</sup>Department of Pharmaceutical Sciences, Daniel K. Inouye College of Pharmacy, University of Hawai'i at Hilo, Hilo, Hawaii 96720, United States

<sup>b</sup>Instituto de Química Rosario (CONICET), Facultad de Ciencias Bioquímicas y Farmacéuticas, Universidad Nacional de Rosario, Suipacha 531, Rosario 2000, Argentina

<sup>c</sup>Department of Cellular and Molecular Biology, Barnard College of Columbia University, USA

\*Corresponding author

## Table of Contents

| Figures  | Content                                                                    | Page |
|----------|----------------------------------------------------------------------------|------|
| Fig. S1  | HRESIMS of compound 1                                                      | 4    |
| Fig. S2  | <sup>1</sup> H NMR spectrum of compound 1 in DMSO-d <sub>6</sub> (400MHz)  | 5    |
| Fig. S3  | <sup>13</sup> C NMR spectrum of compound 1 in DMSO-d <sub>6</sub> (100MHz) | 6    |
| Fig. S4  | HSQC spectrum of compound 1 in DMSO-d <sub>6</sub> (400MHz)                | 7    |
| Fig. S5  | COSY spectrum of compound 1 in DMSO-d <sub>6</sub> (400MHz)                | 8    |
| Fig. S6  | HMBC spectrum of compound 1 in DMSO-d <sub>6</sub> (400MHz)                | 9    |
| Fig. S7  | ROESY spectrum of compound 1 in DMSO-d <sub>6</sub> (400MHz)               | 10   |
| Fig. S8  | DP4+ probability of compound 1                                             | 11   |
| Fig. S9  | Marfey analysis of <i>D</i> -valine hydrolyzed from 1                      | 12   |
| Fig. S10 | Experimental and calculated ECD spectrum of 1                              | 13   |
| Fig. S11 | IR spectrum of compound 1                                                  | 14   |
| Fig. S12 | HRESIMS of compound 2                                                      | 15   |
| Fig. S13 | <sup>1</sup> H NMR spectrum of compound 2 in DMSO-d <sub>6</sub> (400MHz)  | 16   |
| Fig. S14 | DEPTQ spectrum of compound 2 in DMSO-d <sub>6</sub> (100MHz)               | 17   |
| Fig. S15 | HSQC spectrum of compound 2 in DMSO-d <sub>6</sub> (400MHz)                | 18   |
| Fig. S16 | COSY spectrum of compound 2 in DMSO-d <sub>6</sub> (400MHz)                | 19   |
| Fig. S17 | HMBC spectrum of compound 2 in DMSO-d <sub>6</sub> (400MHz)                | 20   |
| Fig. S18 | ROESY spectrum of compound 2 in DMSO-d <sub>6</sub> (400MHz)               | 21   |
| Fig. S19 | DP4+ probability of compound 2                                             | 22   |
| Fig. S20 | Marfey analysis of allo- <i>D</i> -isoleucine hydrolyzed from 2            | 23   |
| Fig. S21 | Experimental and calculated ECD spectrum of 2                              | 24   |
| Fig. S22 | IR spectrum of compound 2                                                  | 25   |
| Fig. S23 | HRESIMS of compound 3                                                      | 26   |
| Fig. S24 | <sup>1</sup> H NMR spectrum of compound 3 in CD <sub>3</sub> OD (400MHz)   | 27   |
| Fig. S25 | DEPTQ spectrum of compound 3 in CD <sub>3</sub> OD (100MHz)                | 28   |
| Fig. S26 | HSQC spectrum of compound 3 in CD <sub>3</sub> OD (400MHz)                 | 29   |

|                |                                                                                                                               |             |
|----------------|-------------------------------------------------------------------------------------------------------------------------------|-------------|
| Fig. S27       | COSY spectrum of compound 3 in CD <sub>3</sub> OD (400MHz)                                                                    | 30          |
| Fig. S28       | HMBC spectrum of compound 3 in CD <sub>3</sub> OD (400MHz)                                                                    | 31          |
| <b>Figures</b> | <b>Content</b>                                                                                                                | <b>Page</b> |
| Fig. S29       | ROESY spectrum of compound 3 in CD <sub>3</sub> OD (400MHz)                                                                   | 32          |
| Fig. S30       | IR spectrum of compound 3                                                                                                     | 33          |
| Fig. S31       | HRESIMS of compound 4                                                                                                         | 34          |
| Fig. S32       | <sup>1</sup> H NMR spectrum of compound 4 in CD <sub>3</sub> OD (400MHz)                                                      | 35          |
| Fig. S33       | HSQC spectrum of compound 4 in CD <sub>3</sub> OD (400MHz)                                                                    | 36          |
| Fig. S34       | COSY spectrum of compound 4 in CD <sub>3</sub> OD (400MHz)                                                                    | 37          |
| Fig. S35       | HMBC spectrum of compound 4 in CD <sub>3</sub> OD (400MHz)                                                                    | 38          |
| Fig. S36       | ROESY spectrum of compound 4 in CD <sub>3</sub> OD (400MHz)                                                                   | 39          |
| Fig. S37       | IR spectrum of compound 4                                                                                                     | 40          |
| Fig. S38       | HRESIMS of compound 5                                                                                                         | 41          |
| Fig. S39       | <sup>1</sup> H NMR spectrum of compound 5 in CD <sub>3</sub> OD (400MHz)                                                      | 42          |
| Fig. S40       | HSQC spectrum of compound 5 in CD <sub>3</sub> OD (400MHz)                                                                    | 43          |
| Fig. S41       | COSY spectrum of compound 5 in CD <sub>3</sub> OD (400MHz)                                                                    | 44          |
| Fig. S42       | HMBC spectrum of compound 5 in CD <sub>3</sub> OD (400MHz)                                                                    | 45          |
| Fig. S43       | ROESY spectrum of compound 5 in CD <sub>3</sub> OD (400MHz)                                                                   | 46          |
| Fig. S44       | IR spectrum of compound 5                                                                                                     | 47          |
| Fig. S45       | HRESIMS of compound 6                                                                                                         | 48          |
| Fig. S46       | <sup>1</sup> H NMR spectrum of compound 6 in CD <sub>3</sub> OD (400MHz)                                                      | 49          |
| Fig. S47       | DEPTQ spectrum of compound 6 in CD <sub>3</sub> OD (100MHz)                                                                   | 50          |
| Fig. S48       | HSQC spectrum of compound 6 in CD <sub>3</sub> OD (400MHz)                                                                    | 51          |
| Fig. S49       | COSY spectrum of compound 6 in CD <sub>3</sub> OD (400MHz)                                                                    | 52          |
| Fig. S50       | HMBC spectrum of compound 6 in CD <sub>3</sub> OD (400MHz)                                                                    | 53          |
| Fig. S51       | IR spectrum of compound 6                                                                                                     | 54          |
| Table S1       | <sup>1</sup> H and <sup>13</sup> C NMR Spectroscopic Data, and COSY & HMBC correlations for Compounds 6 in CD <sub>3</sub> OD | 55          |
| Fig. S52       | Structures of the known compounds 7–11                                                                                        | 56          |
|                | Cartesian coordinates                                                                                                         | 57-104      |

**Fig. S1: HRESIMS of compound 1**

KH Ahammad Zaman S-2021-7  
Synapt2\_1580n 23 (0.465) Cm (23:24-5:9)

1: TOF MS ES-  
1.12e6

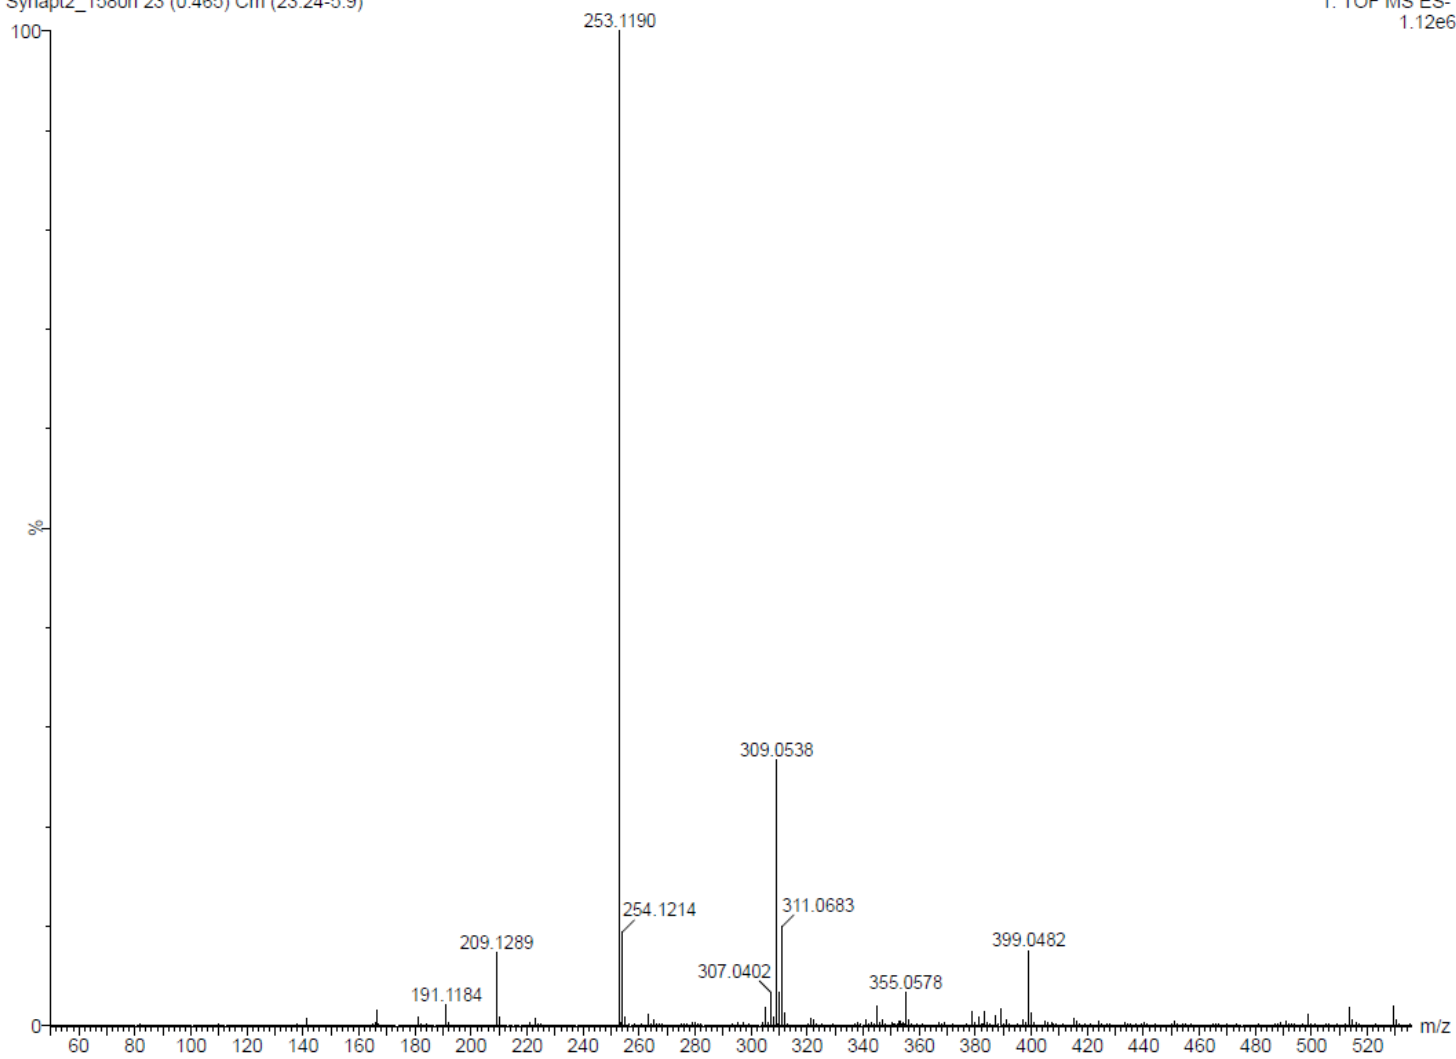

**Fig. S2:  $^1\text{H}$  NMR spectrum of compound 1 in  $\text{DMSO-d}_6$  (400MHz)**

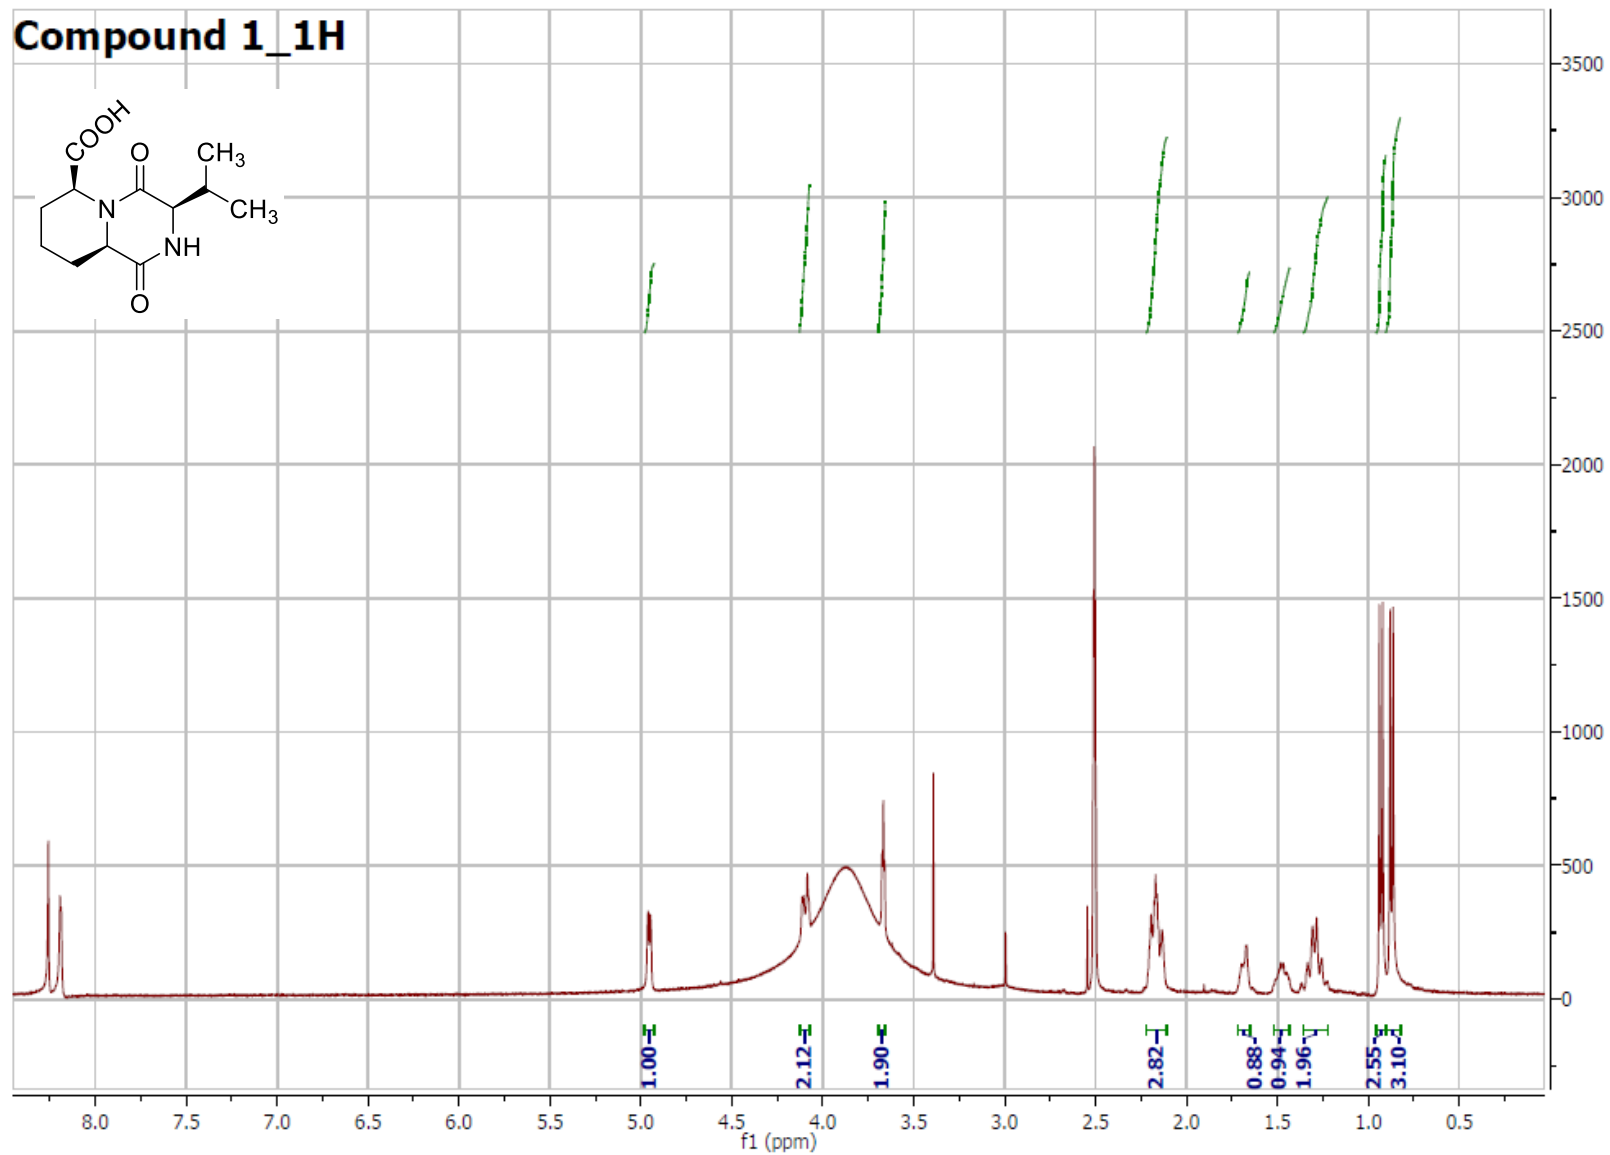

**Fig. S3:** <sup>13</sup>C NMR spectrum of compound 1 in DMSO-d<sub>6</sub> (100MHz)

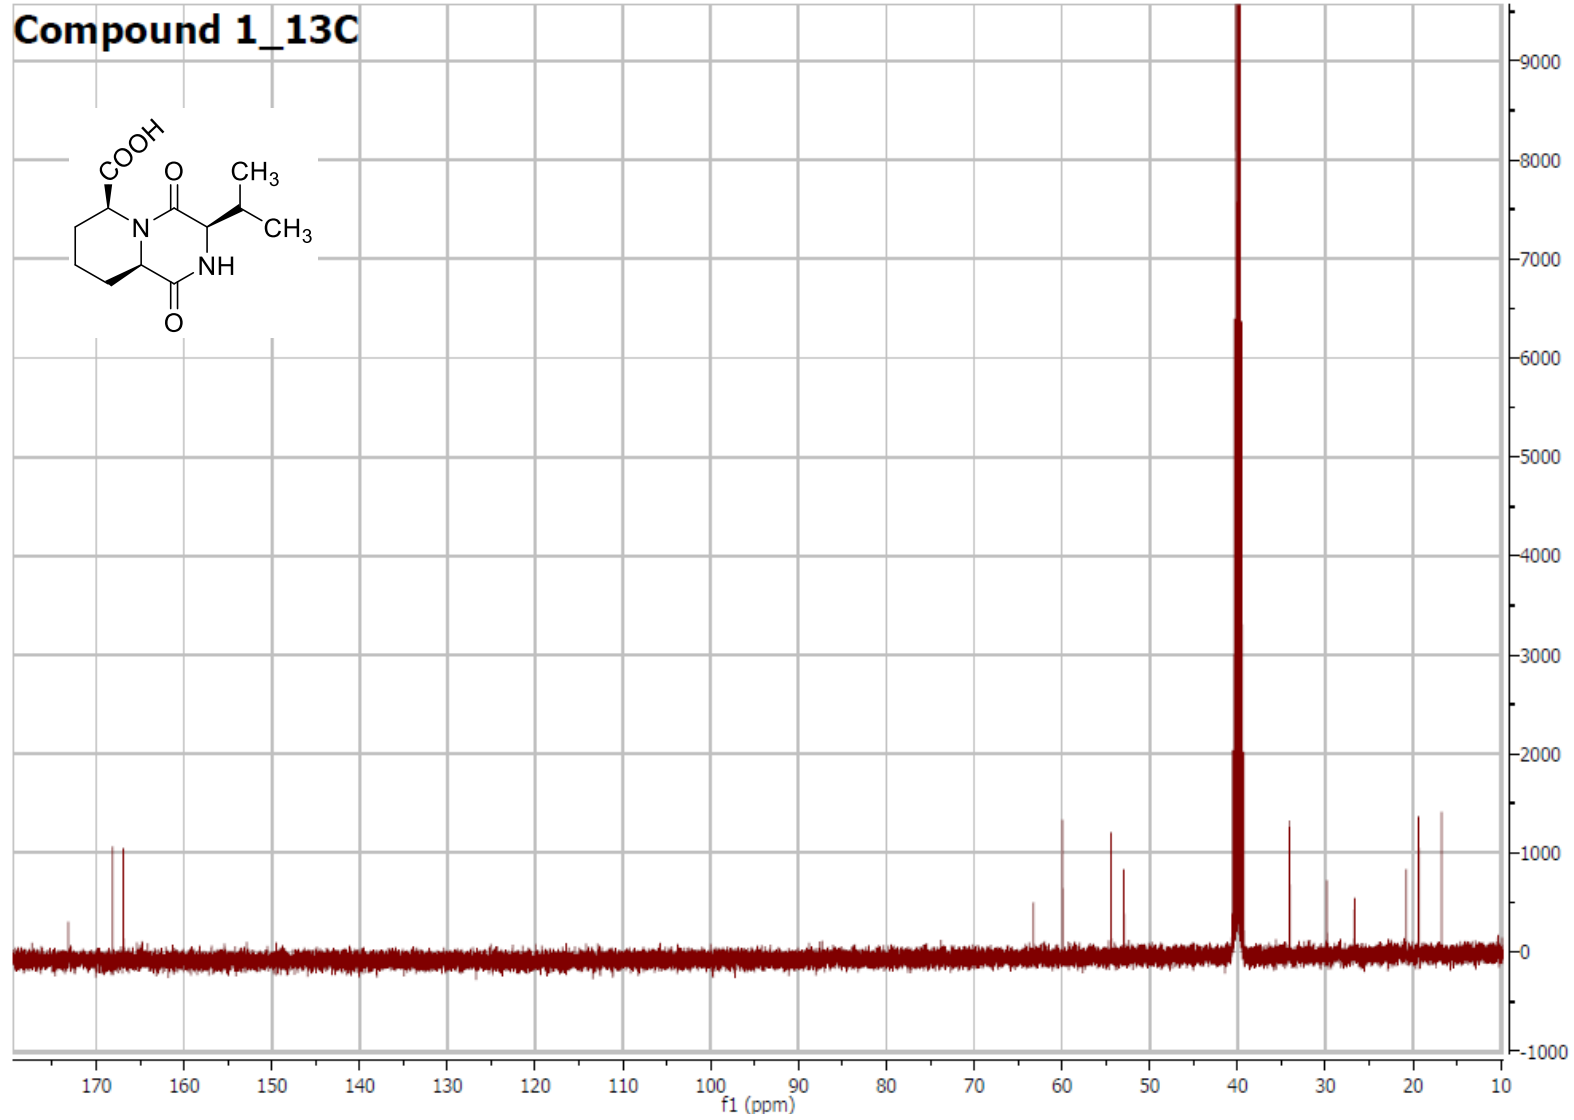

**Fig. S4: HSQC spectrum of compound 1 in DMSO-d<sub>6</sub> (400MHz)**

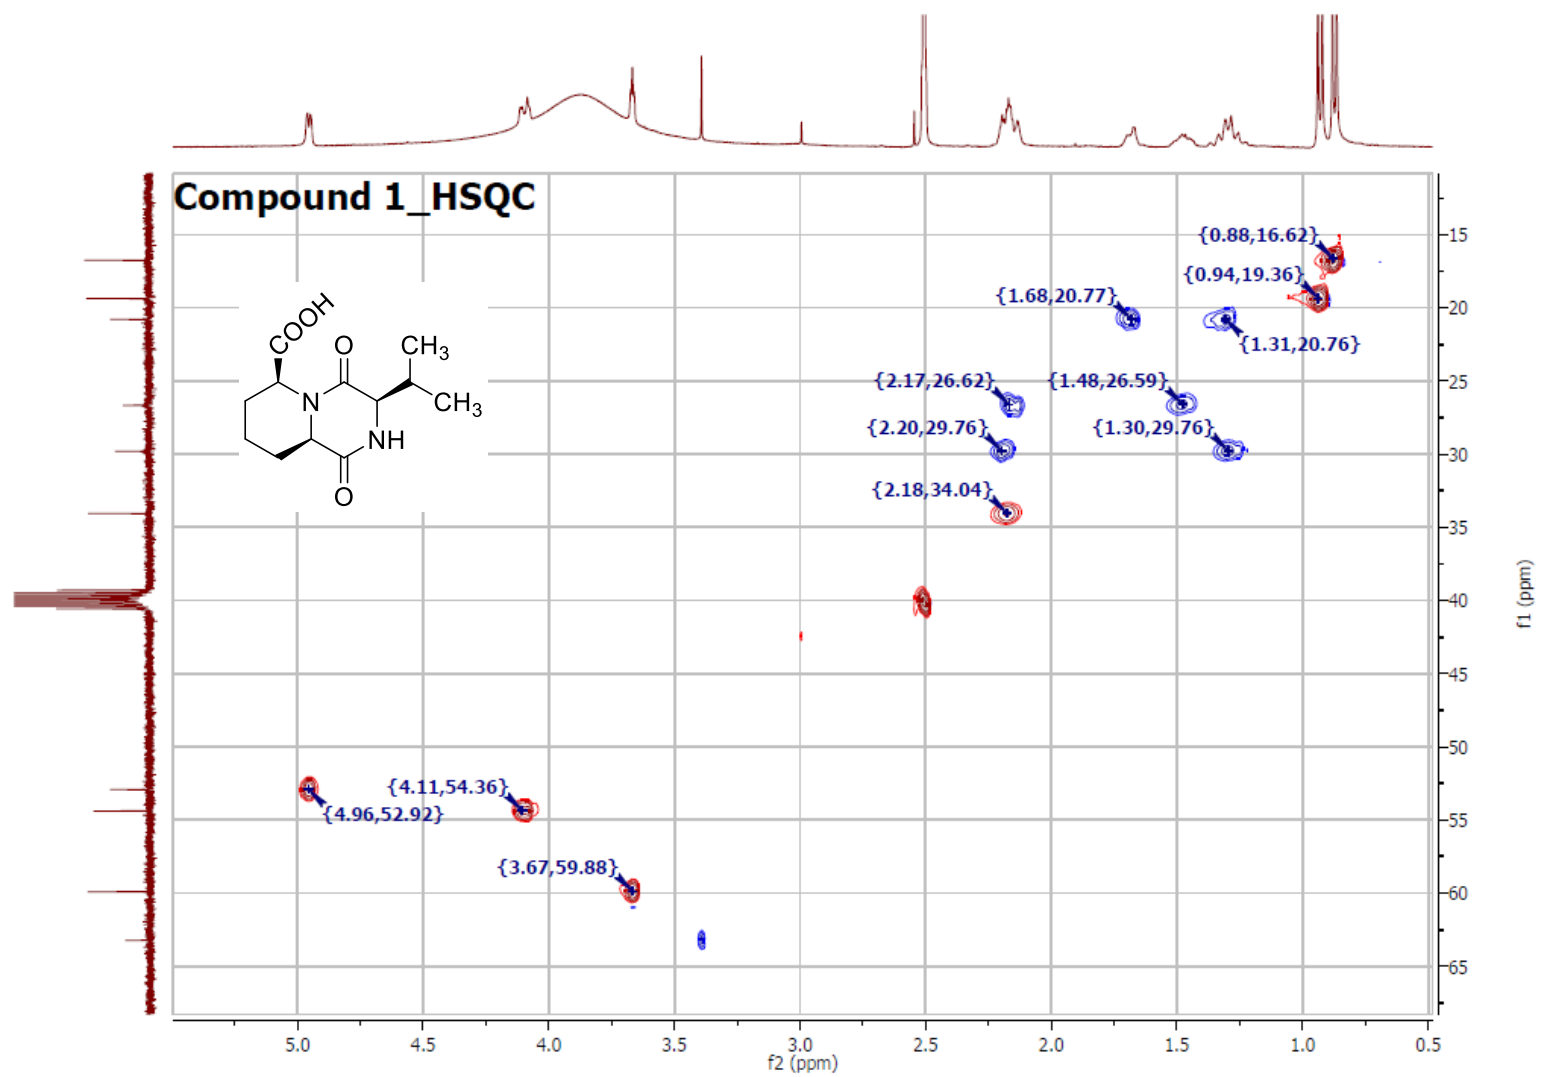

**Fig. S5: COSY spectrum of compound 1 in DMSO-d<sub>6</sub> (400MHz)**



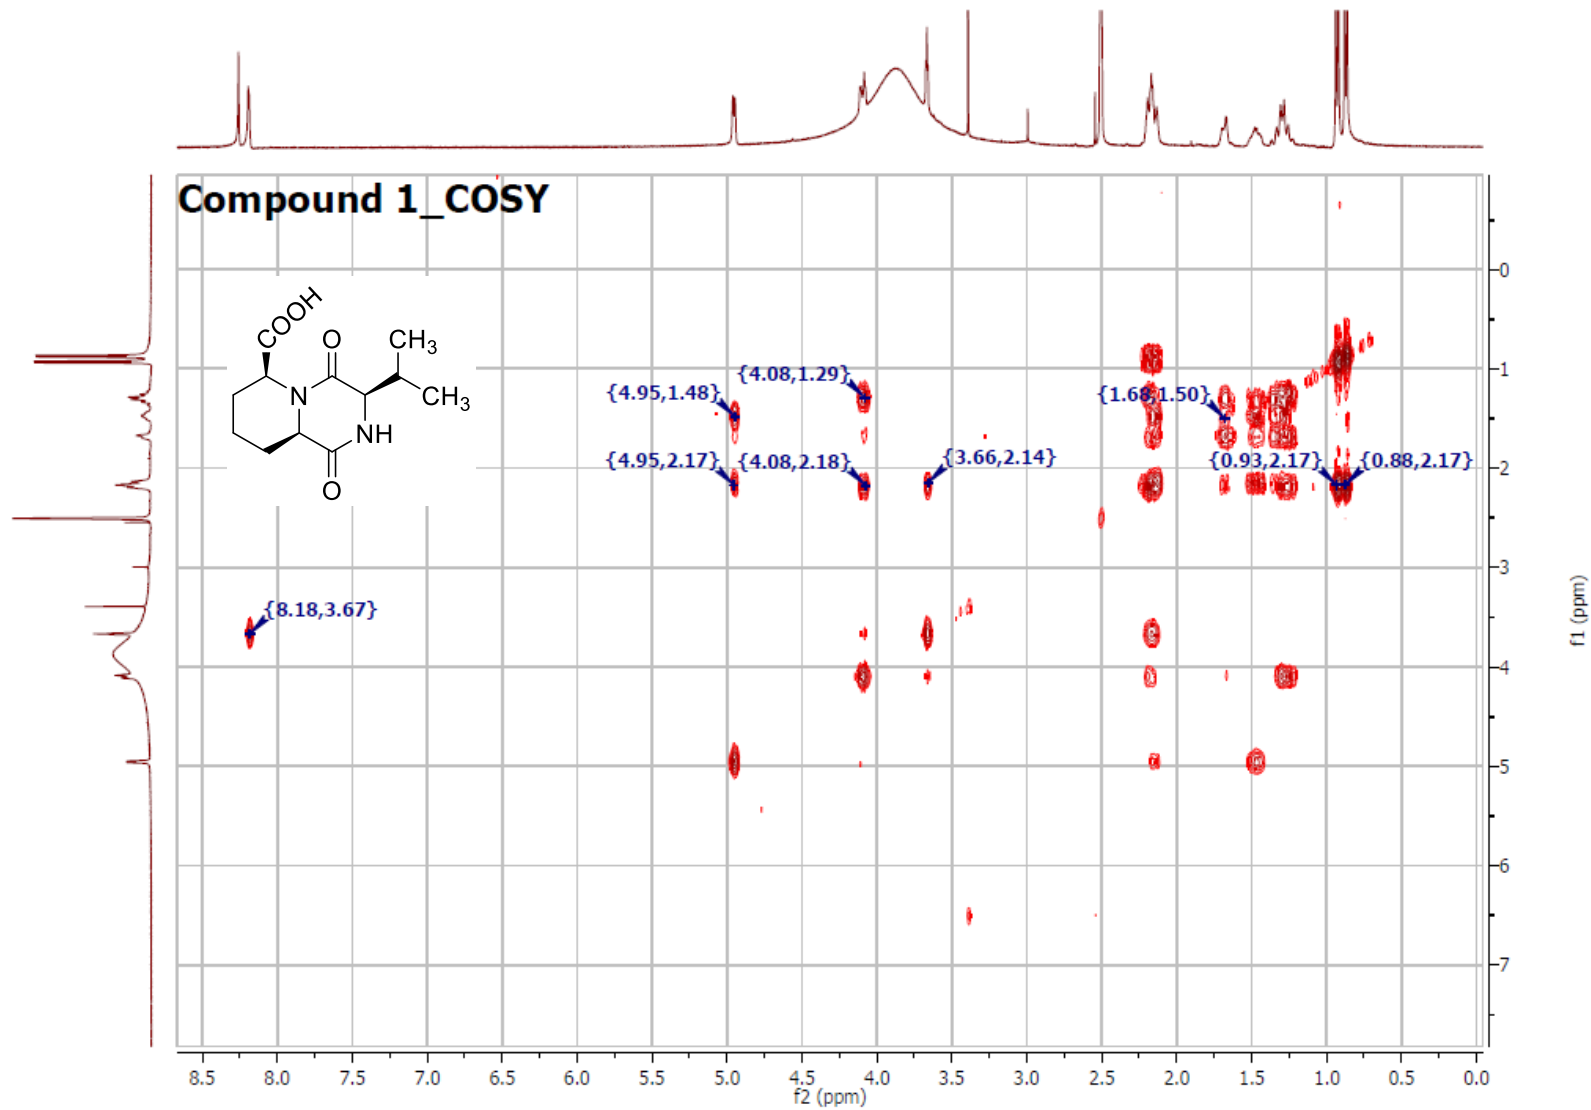

Fig. S6: HMBC spectrum of compound 1 in DMSO-d<sub>6</sub> (400MHz)

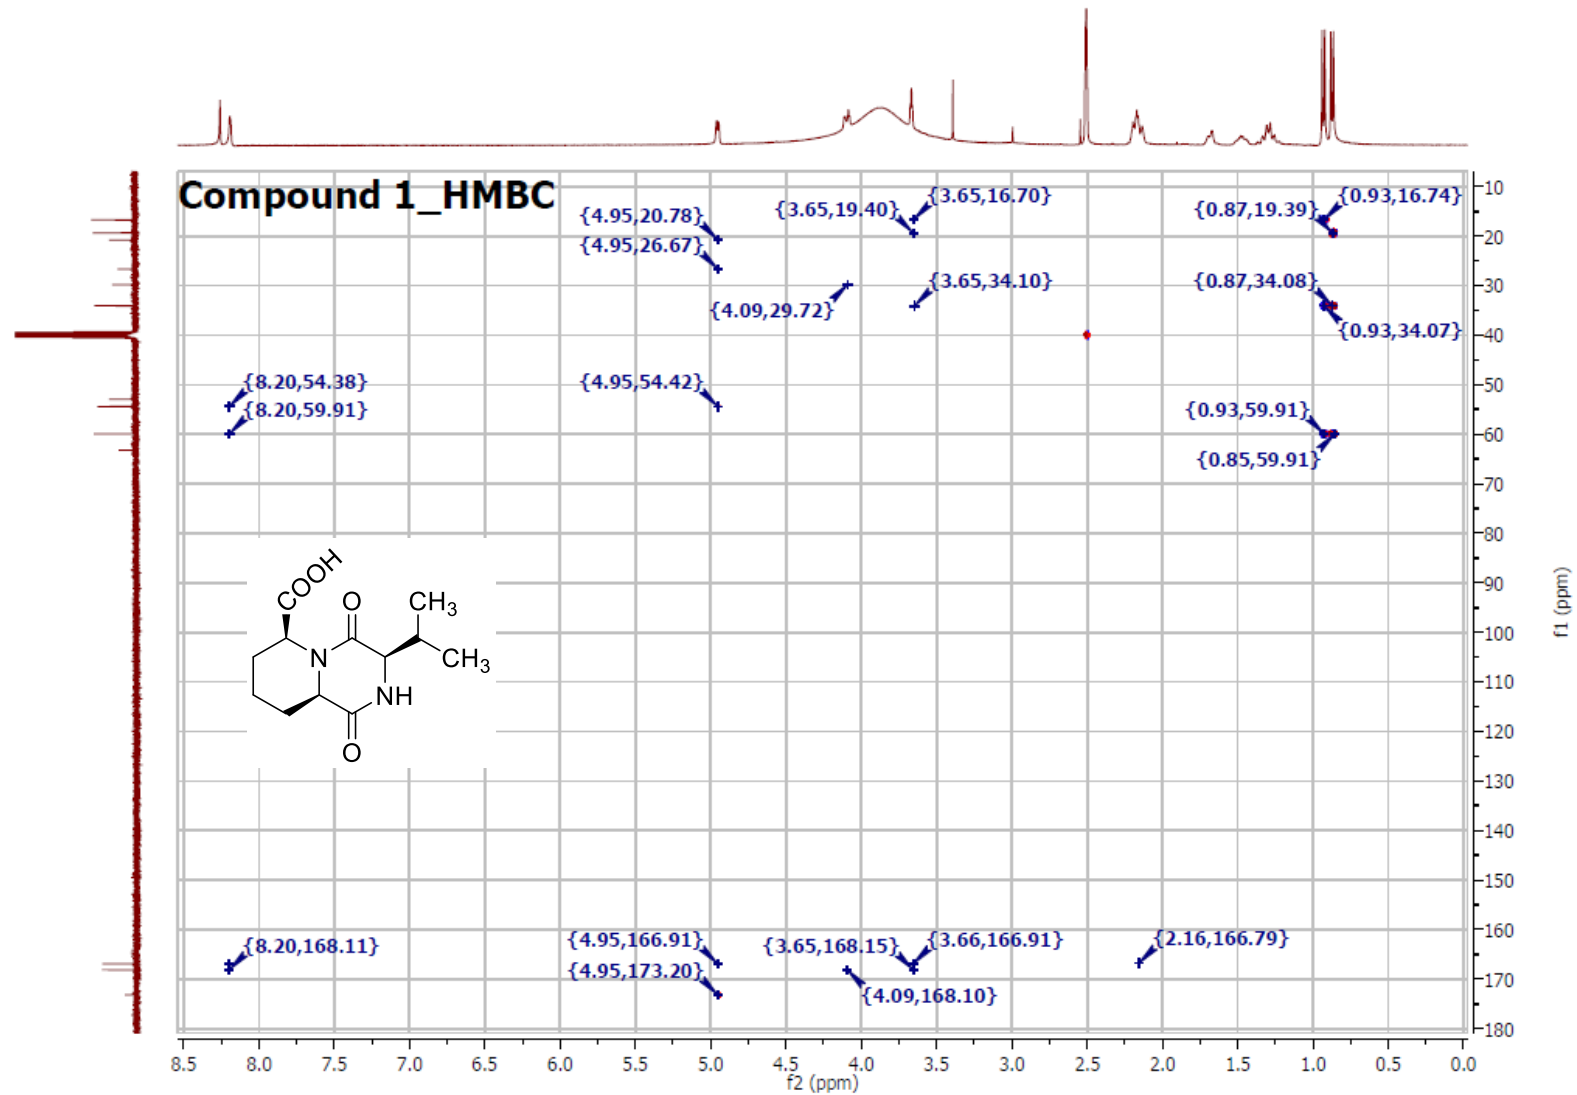

Fig. S7: ROESY spectrum of compound 1 in DMSO-d<sub>6</sub> (400MHz)

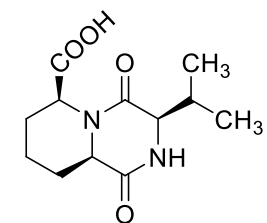

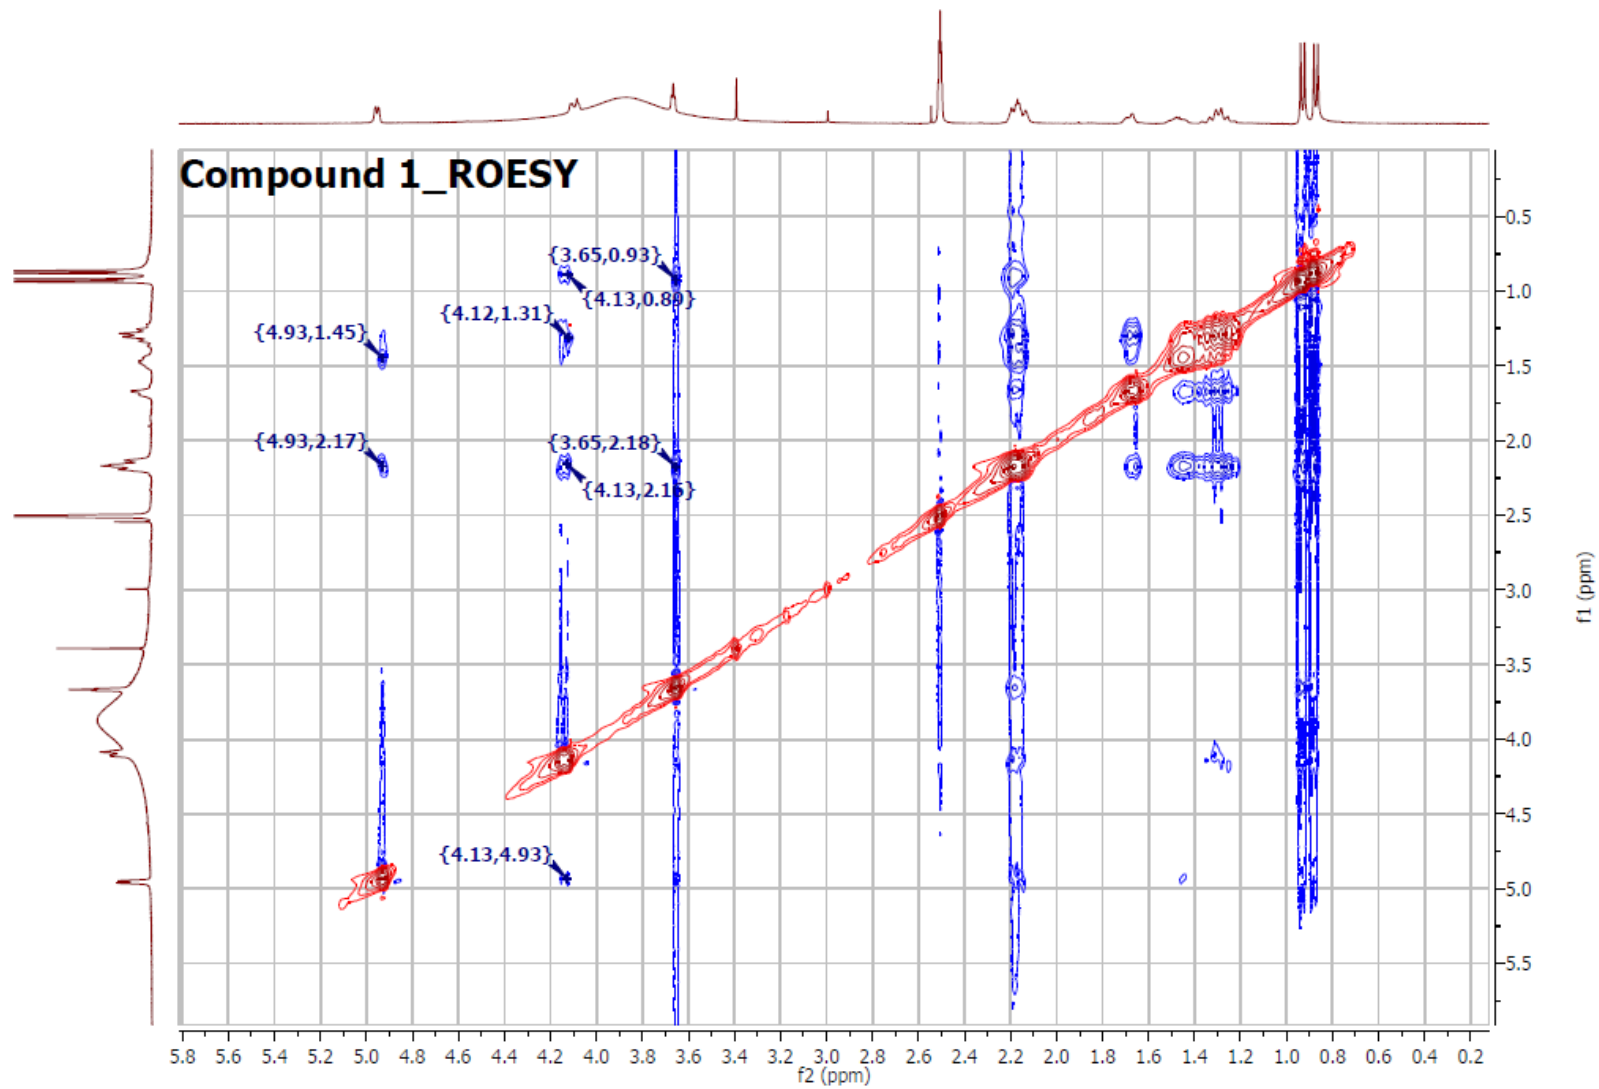

**Fig. S8: DP4+ probability of compound 1**

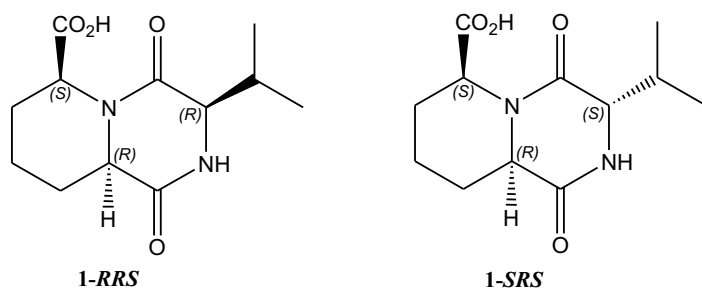

|                  | 1-RRS                                                                                       | 1-SRS                                                                                      |
|------------------|---------------------------------------------------------------------------------------------|--------------------------------------------------------------------------------------------|
| sDP4+ (H data)   |  99.91%  |  0.09%  |
| sDP4+ (C data)   |  99.63%  |  0.37%  |
| sDP4+ (all data) |  100.00% |  0.00%  |
| uDP4+ (H data)   |  84.56%  |  15.44% |
| uDP4+ (C data)   |  99.62%  |  0.38%  |
| uDP4+ (all data) |  99.93%  |  0.07%  |
| DP4+ (H data)    |  99.98%  |  0.02%  |
| DP4+ (C data)    |  100.00% |  0.00%  |
| DP4+ (all data)  |  100.00% |  0.00%  |

**Fig. S9: Marfey analysis of *D*-valine hydrolyzed from 1**

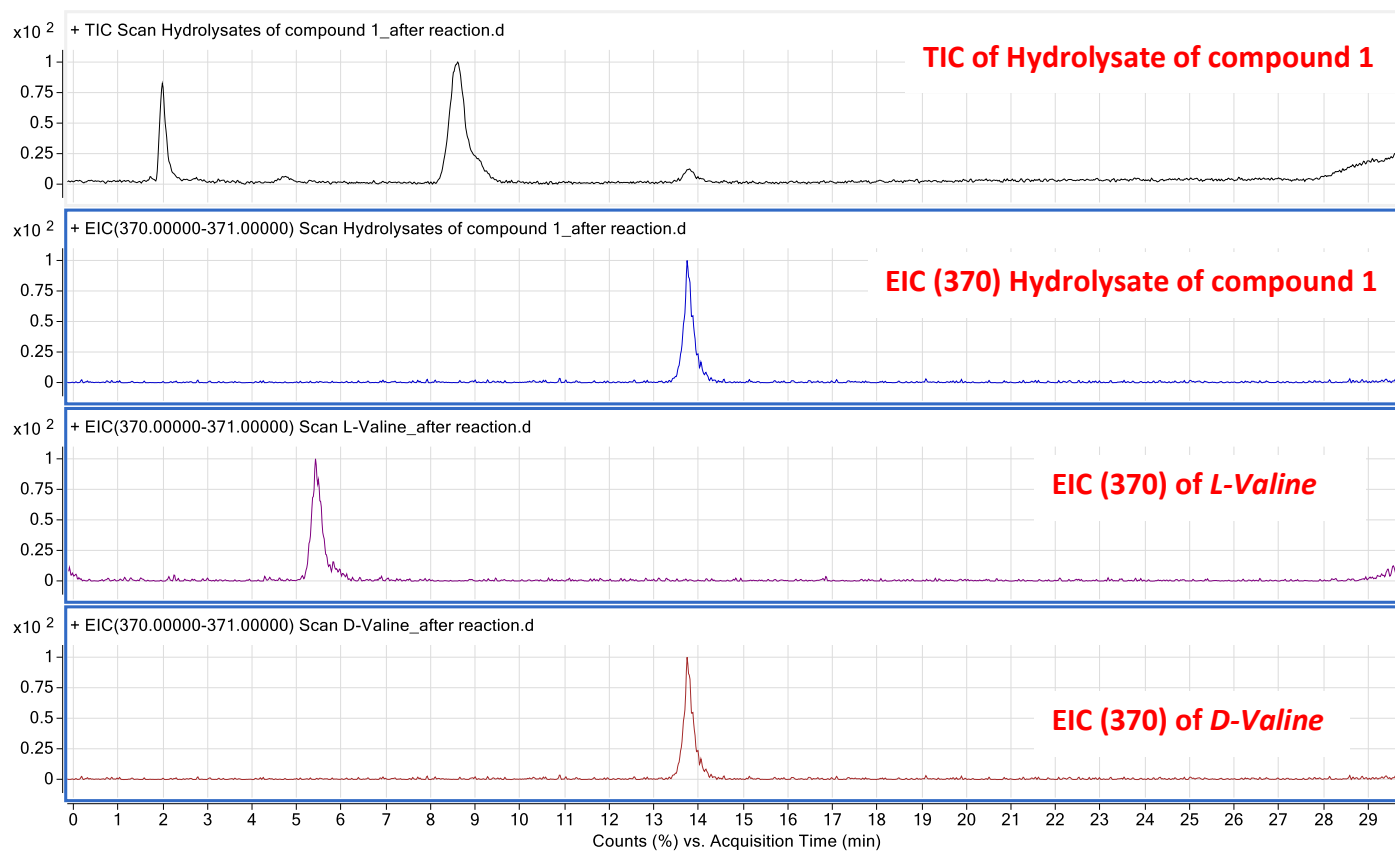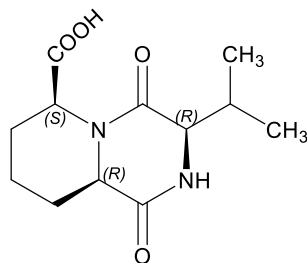

**Fig. S10: Experimental and calculated ECD spectrum of 1**

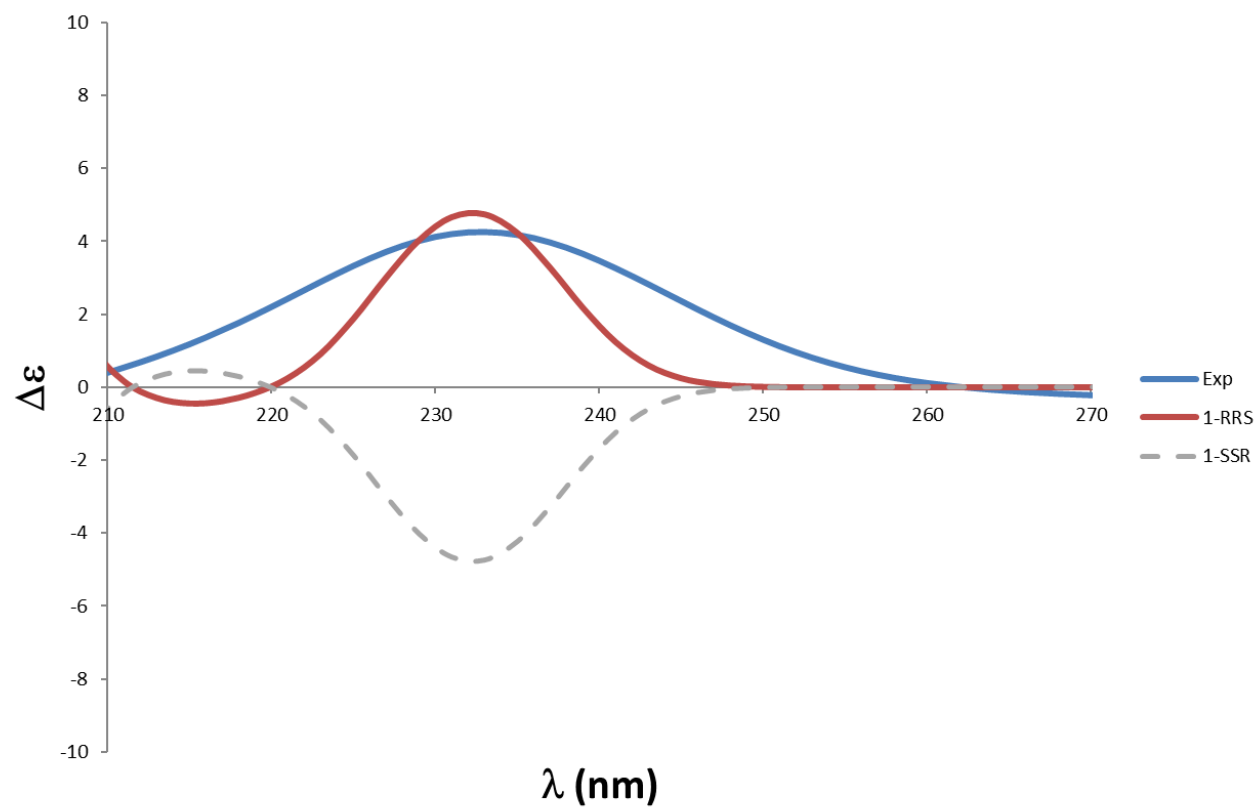

Fig. S11: IR spectrum of compound 1

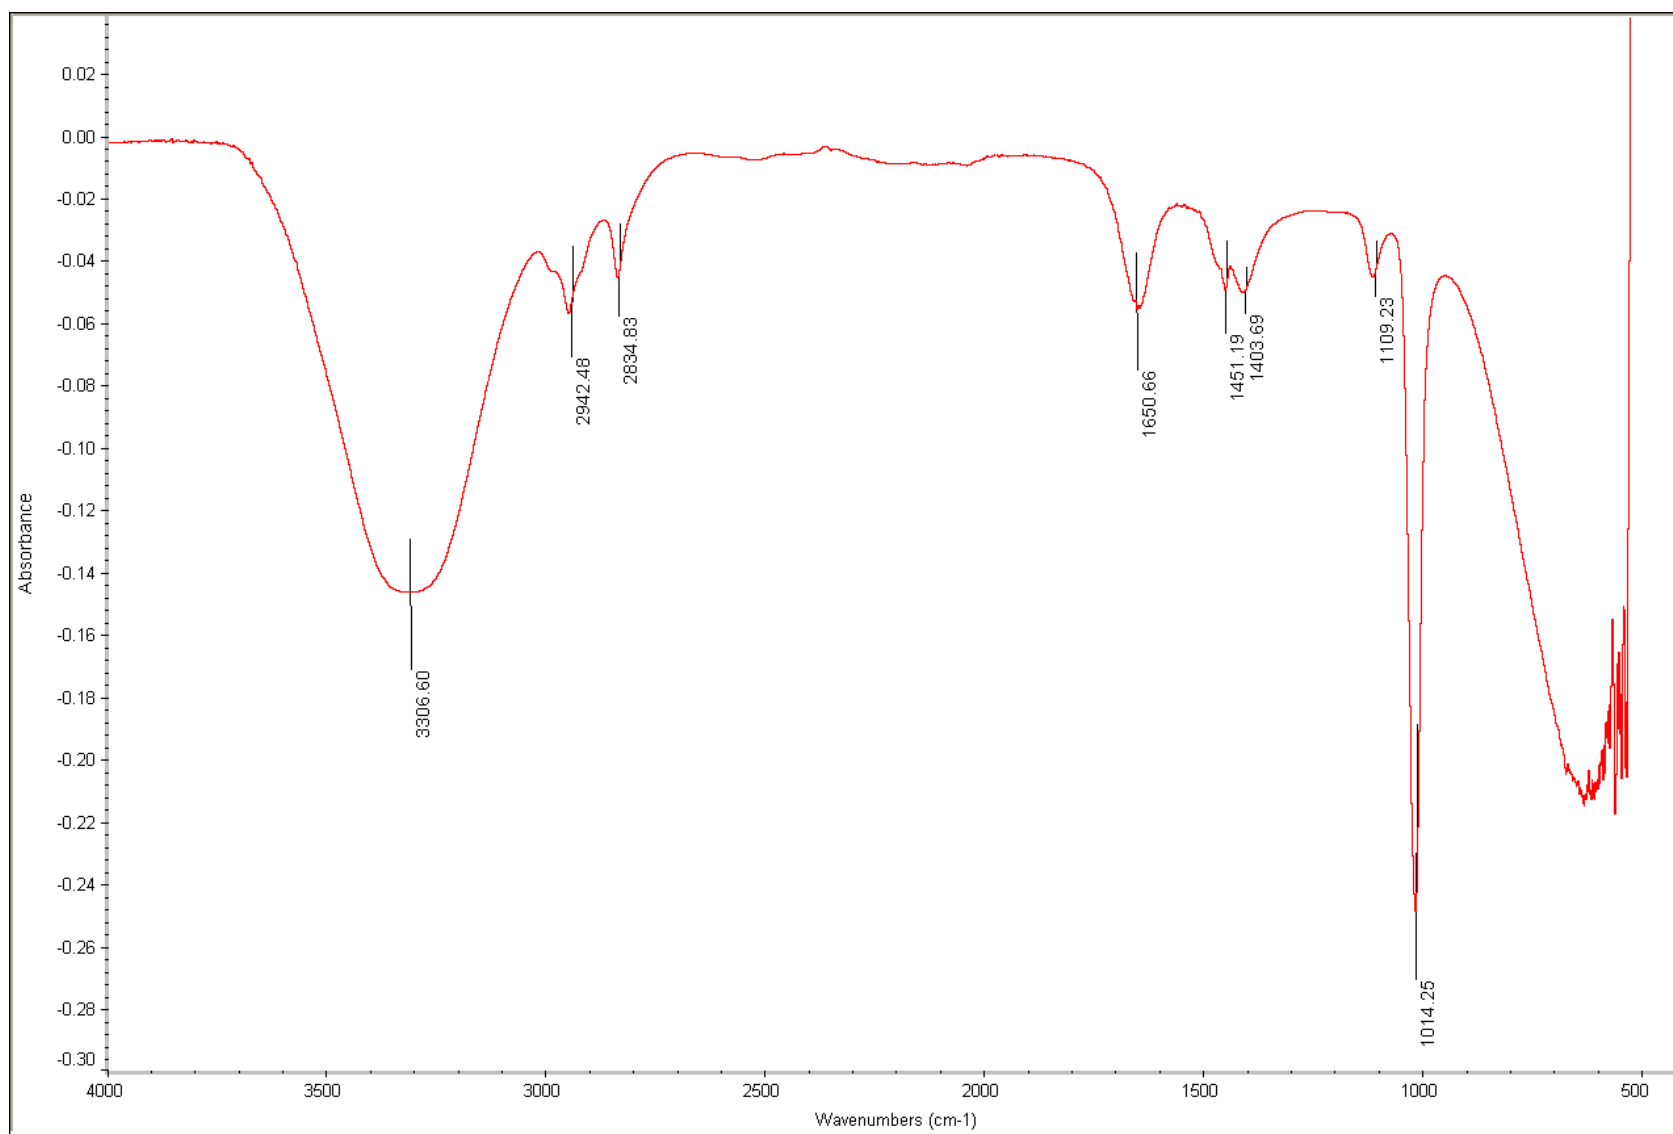

**Fig. S12: HRESIMS of compound 2**

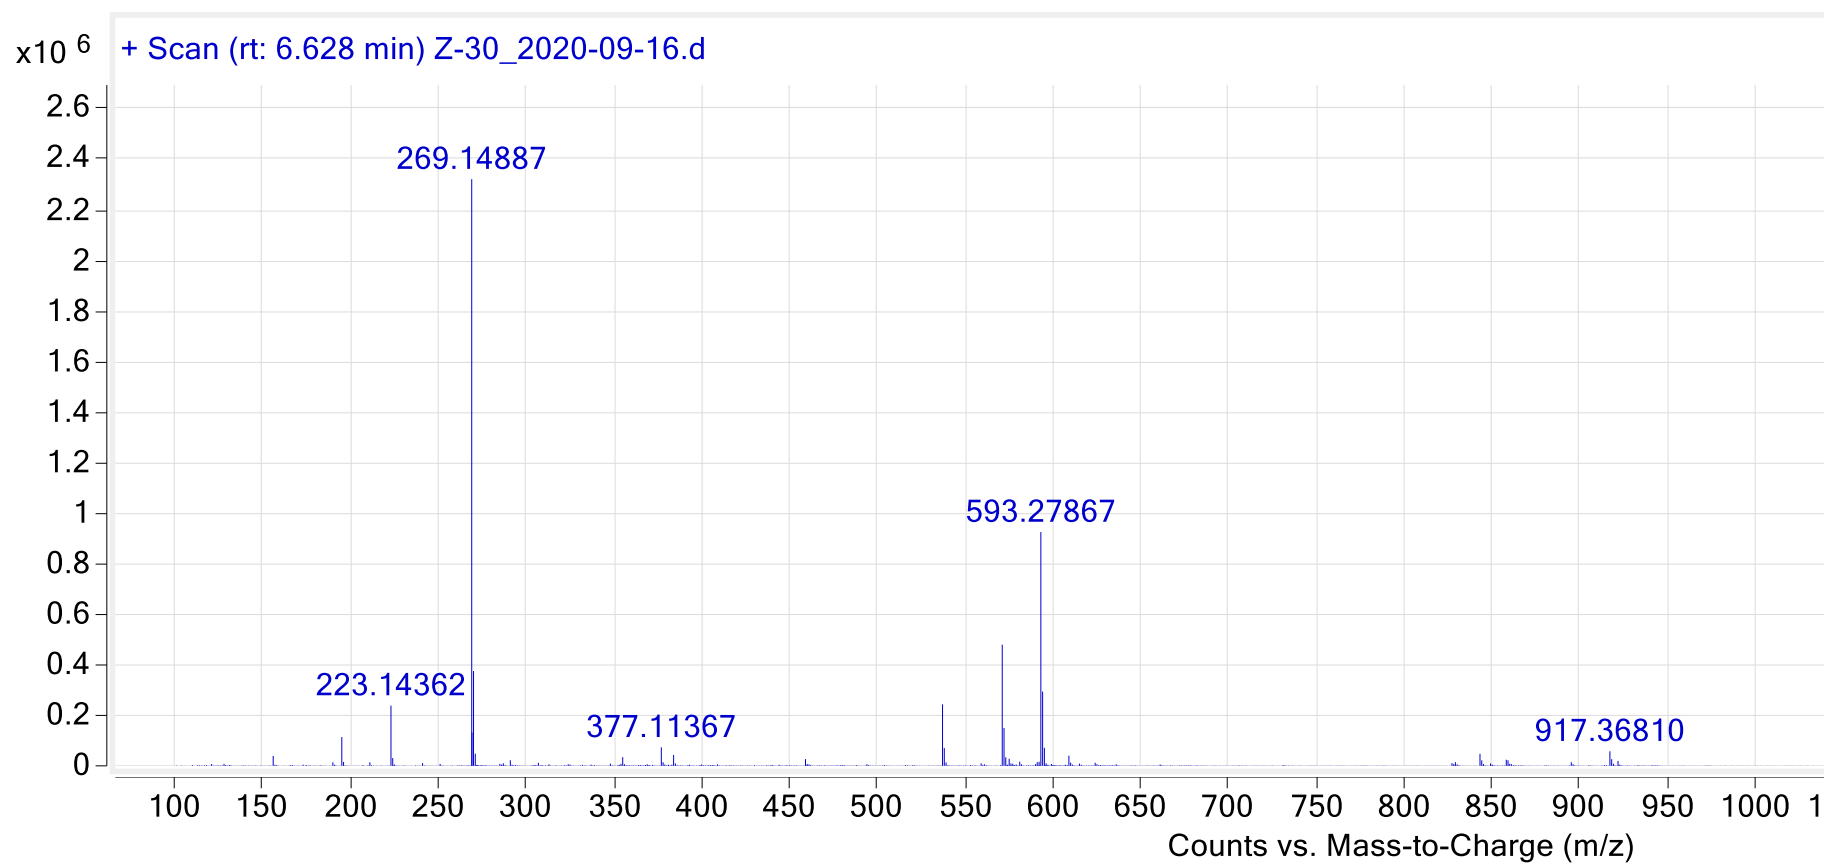

**Fig. S13: <sup>1</sup>H NMR spectrum of compound 2 in DMSO-d<sub>6</sub> (400MHz)**



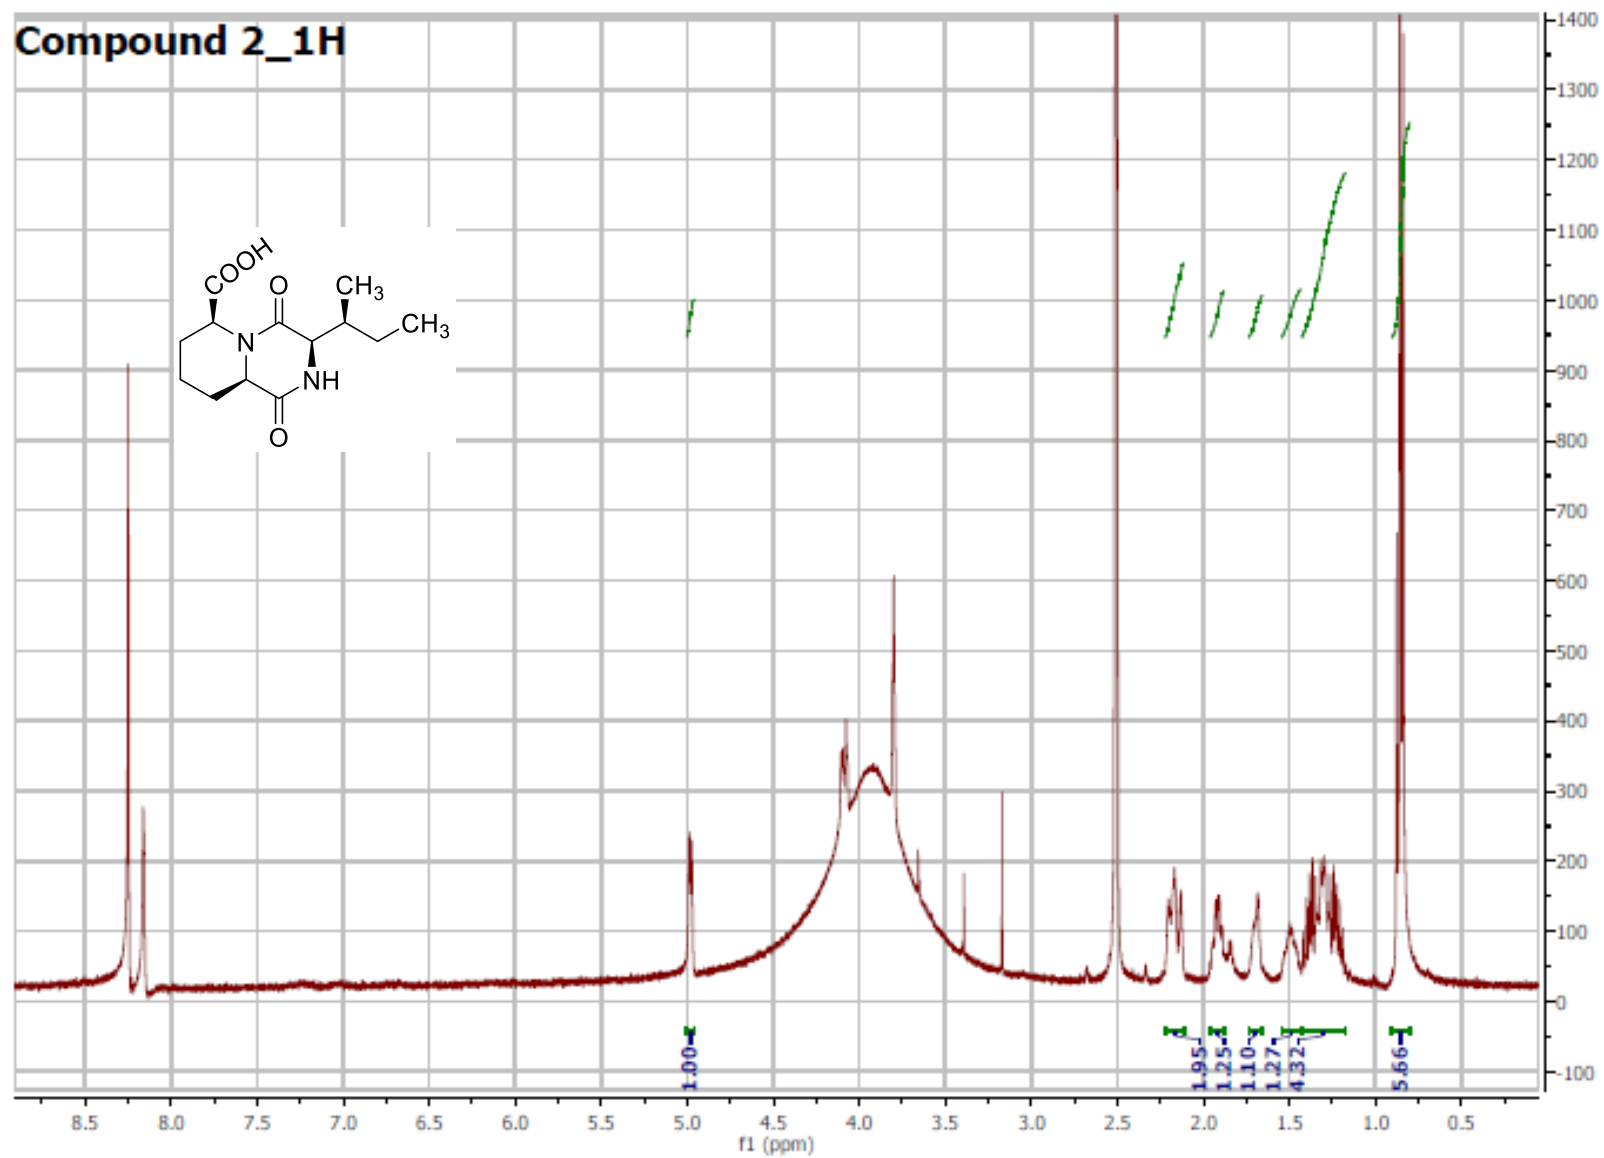

**Fig. S14: DEPTQ spectrum of compound 2 in DMSO-d<sub>6</sub> (100MHz)**

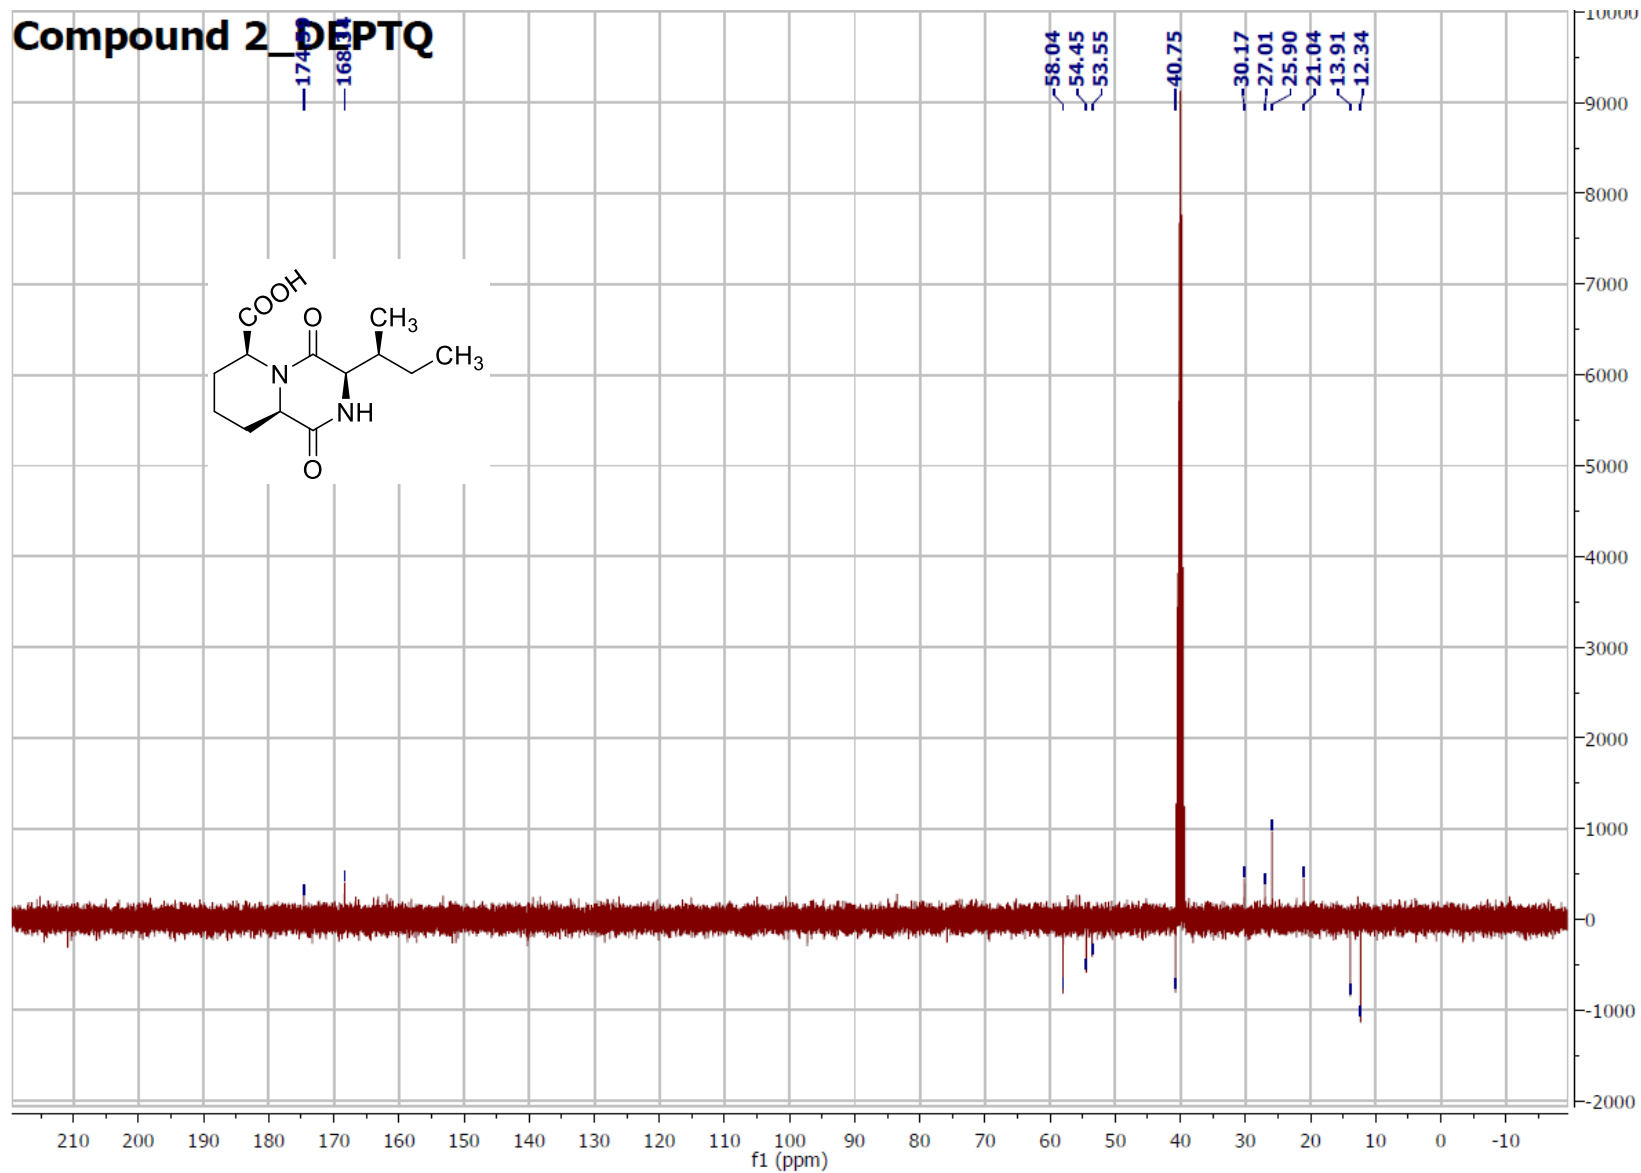

**Fig. S15: HSQC spectrum of compound 2 in DMSO-d<sub>6</sub> (400MHz)**

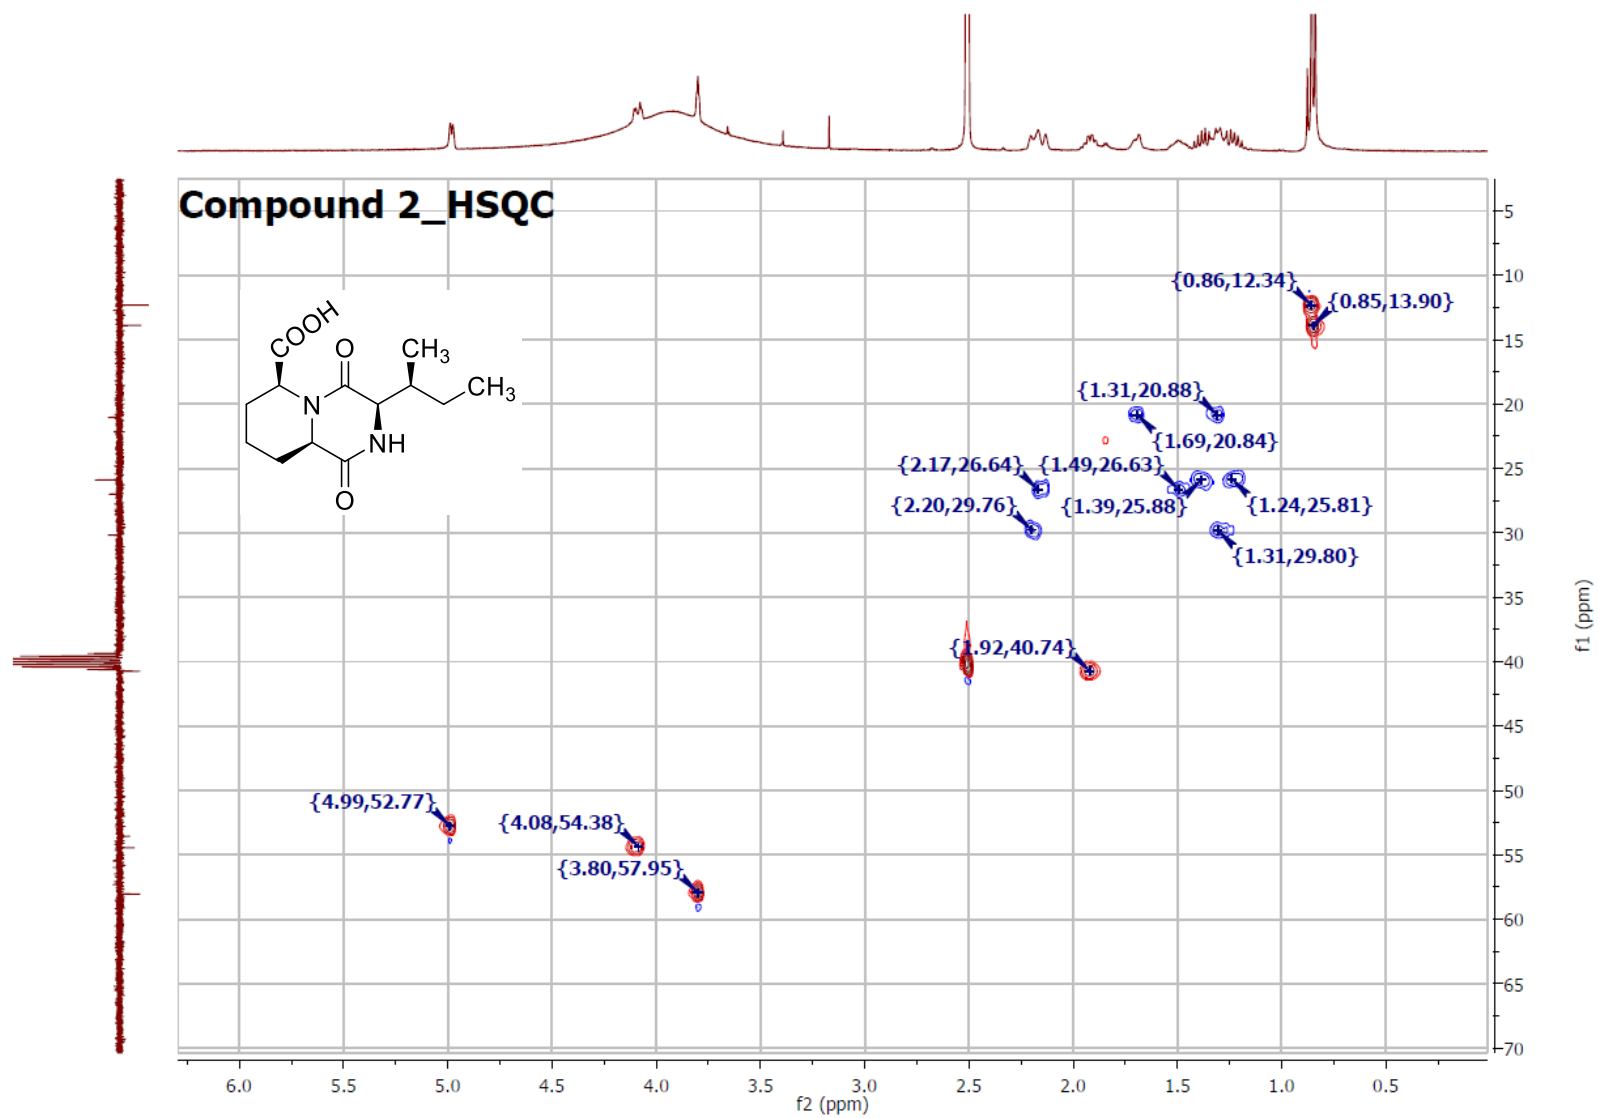

Fig. S16: COSY spectrum of compound 2 in DMSO-d<sub>6</sub> (400MHz)

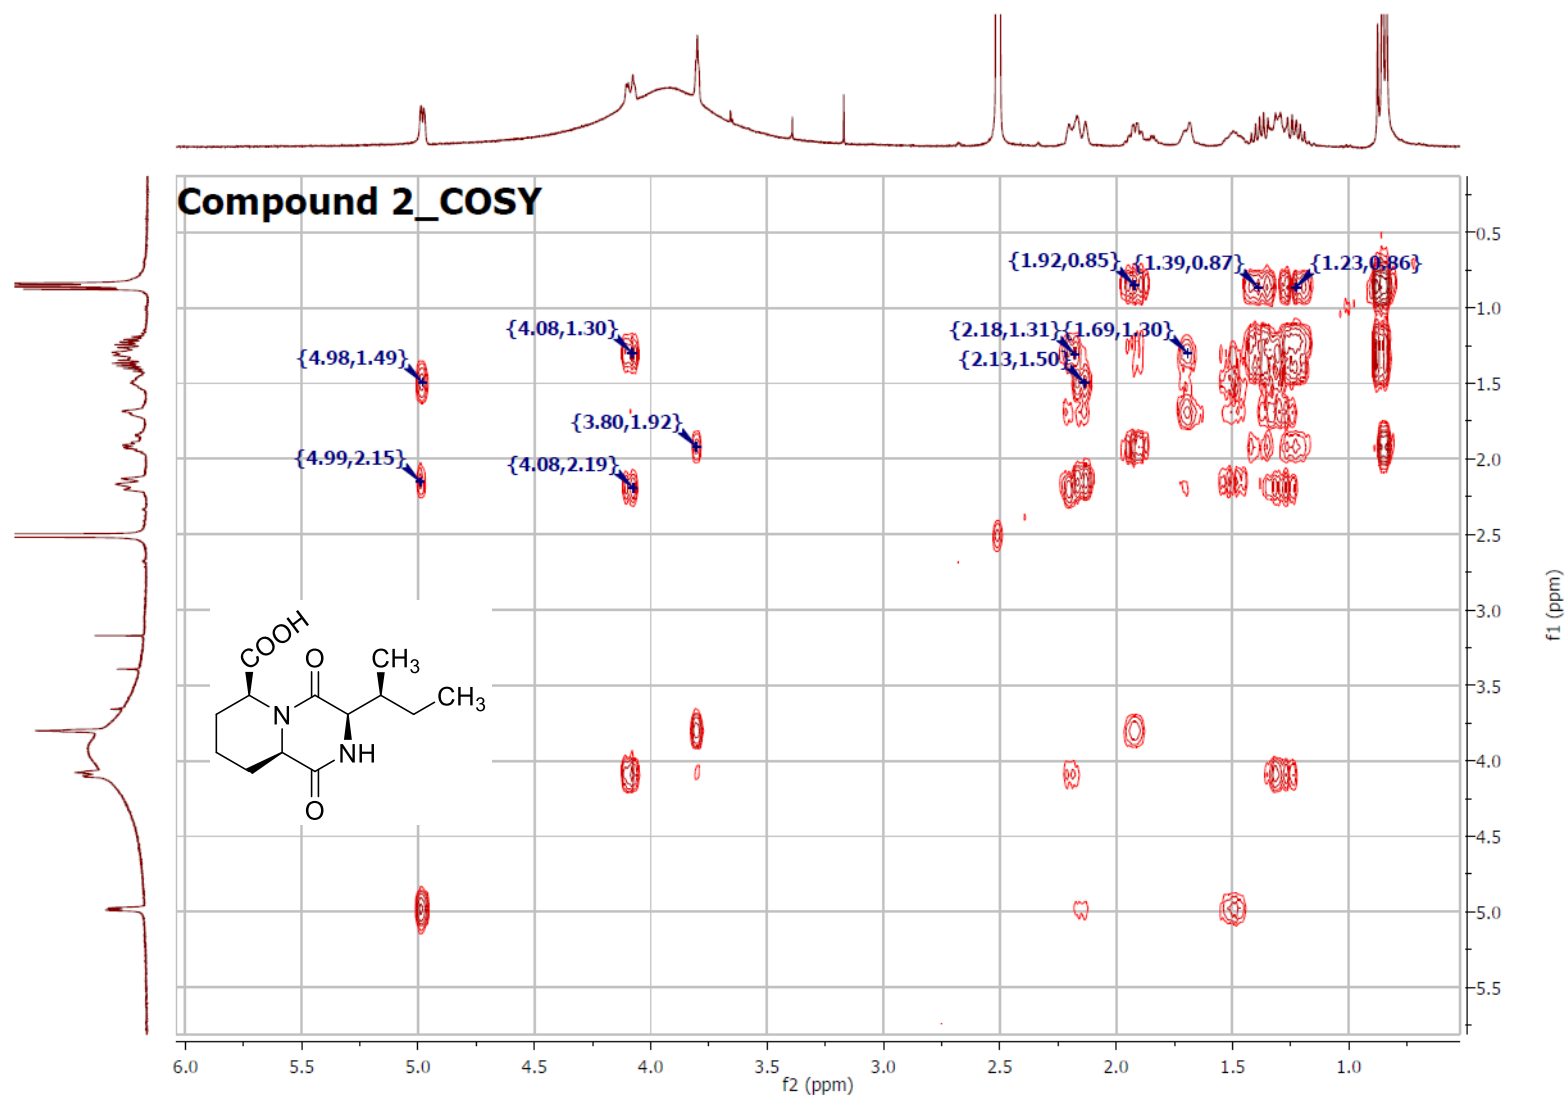

**Fig. S17: HMBC spectrum of compound 2 in DMSO-d<sub>6</sub> (400MHz)**

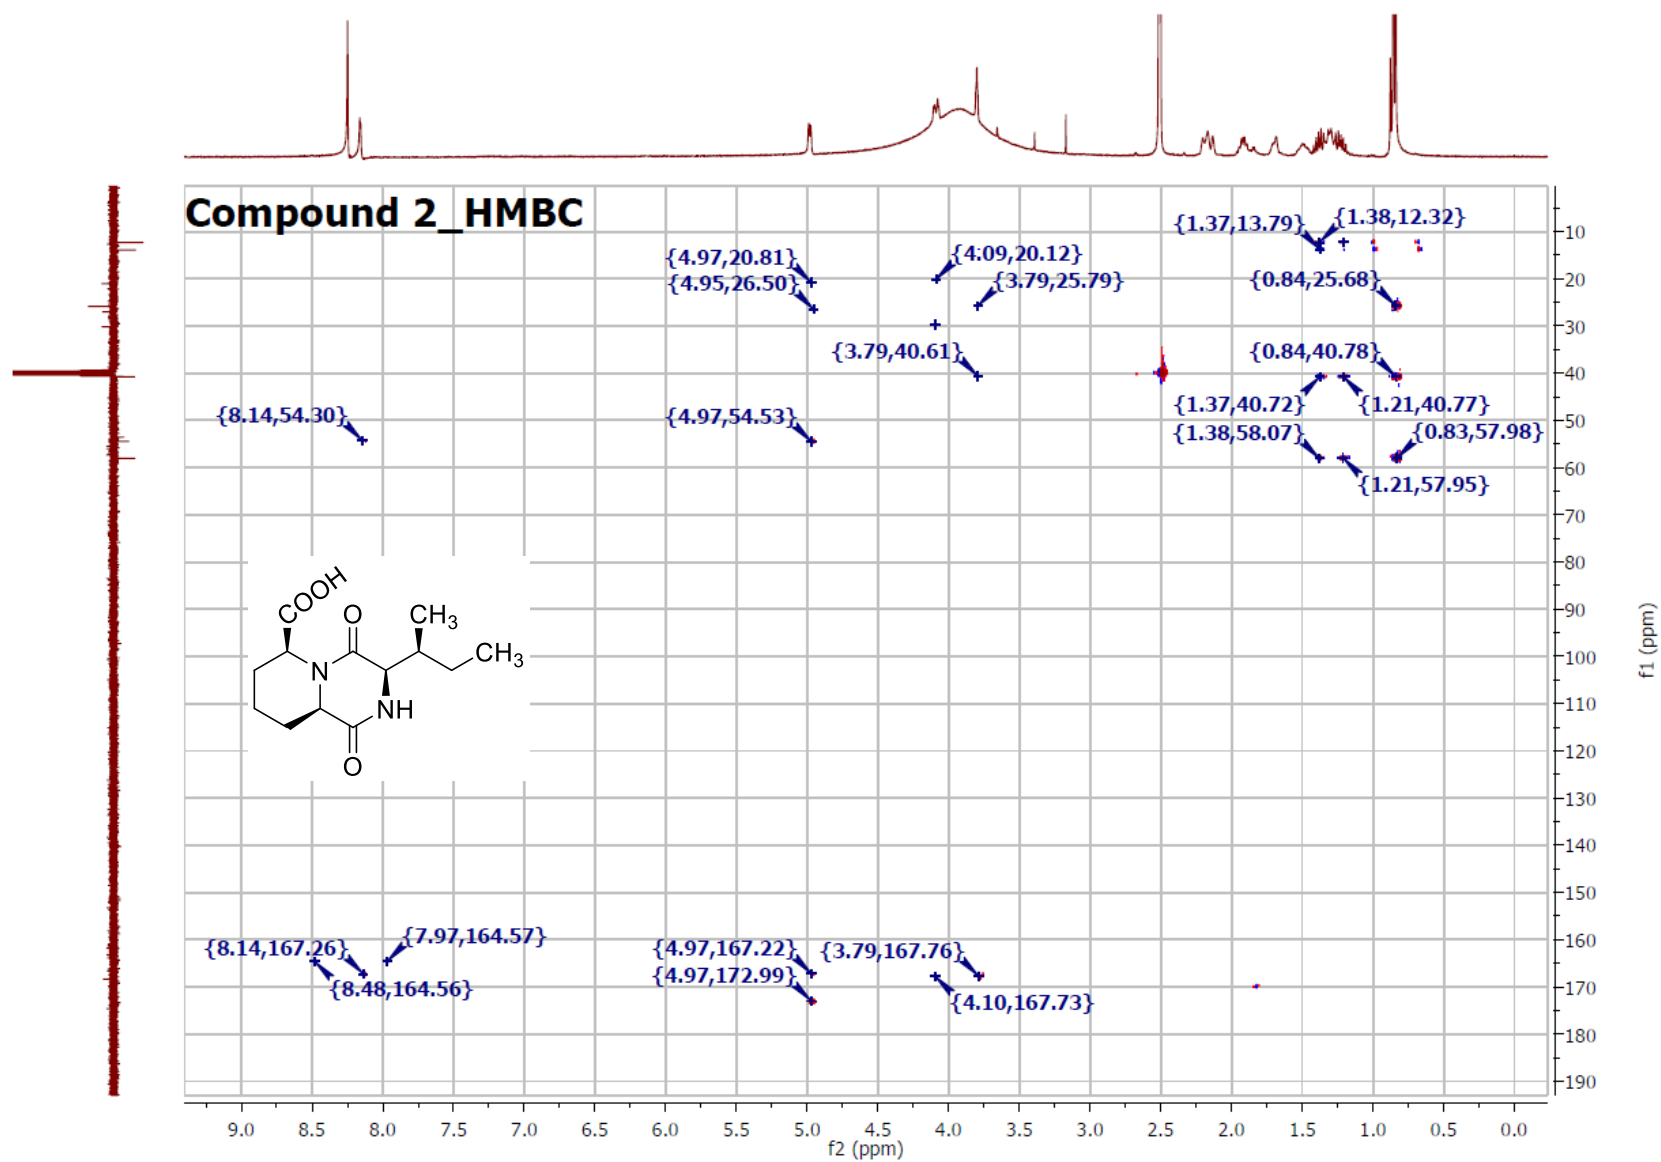

Fig. S18: ROESY spectrum of compound 2 in DMSO-d<sub>6</sub> (400MHz)

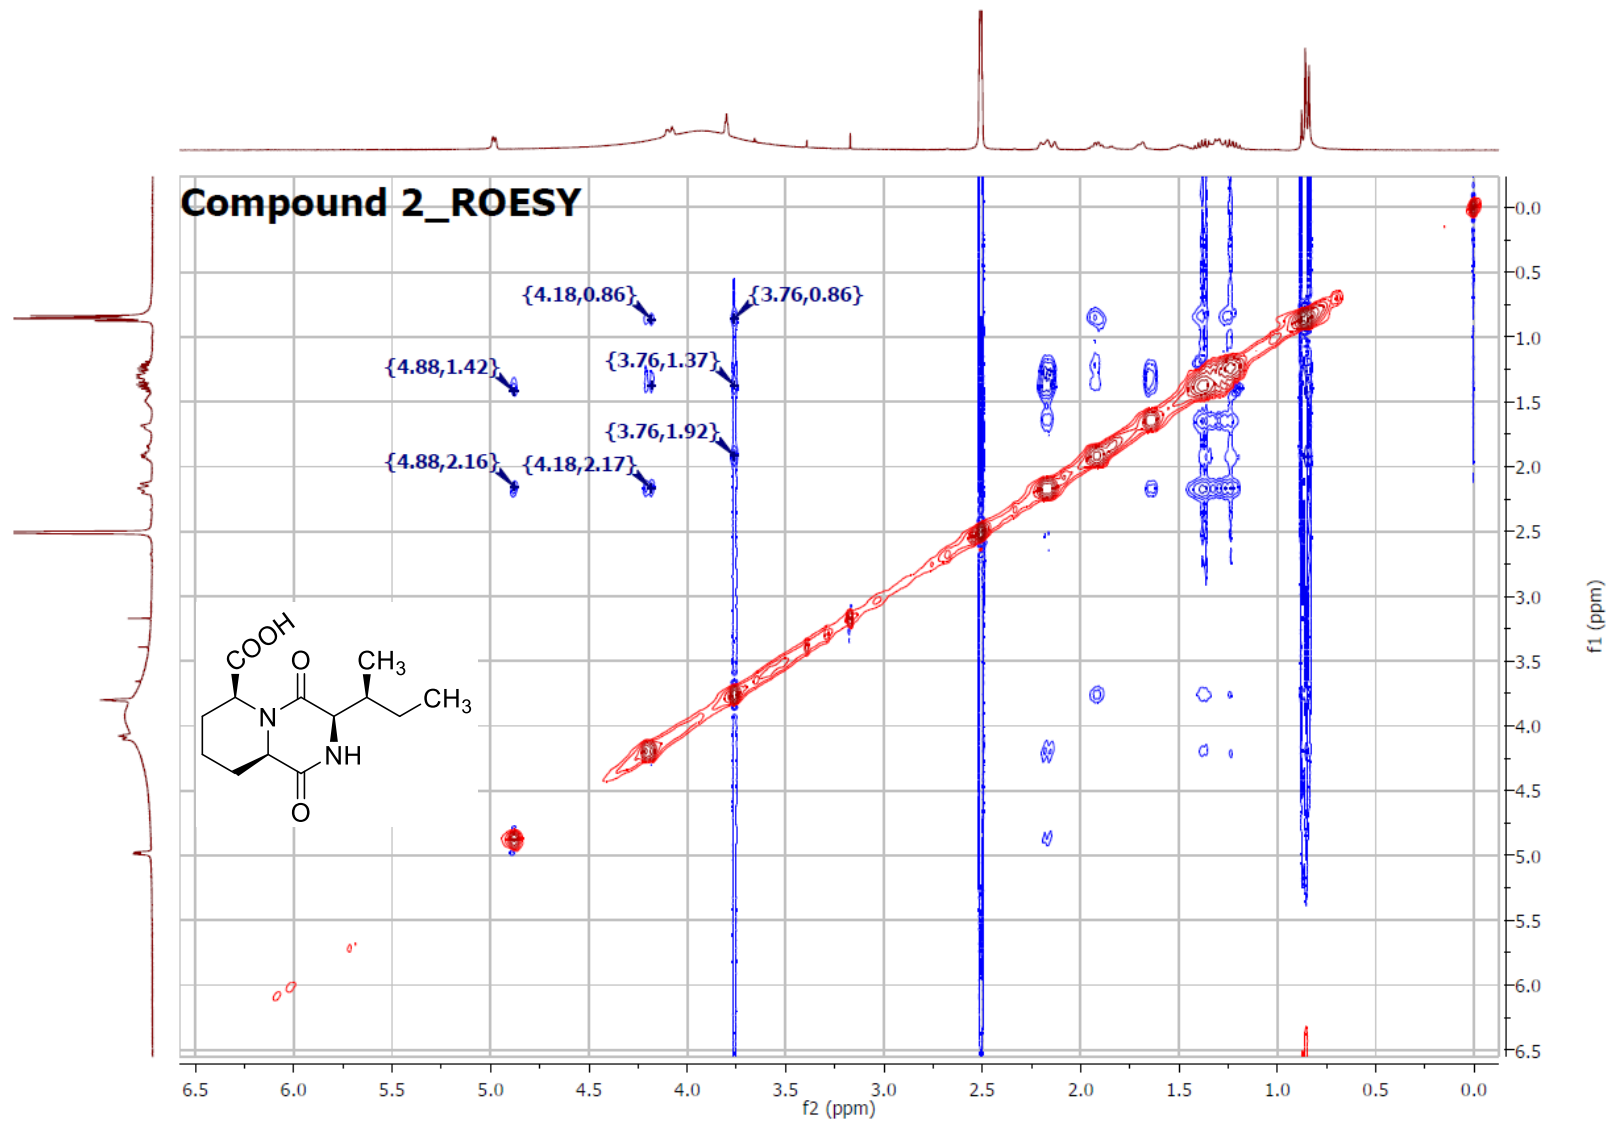

**Fig. S19: DP4+ probability of compound 2**

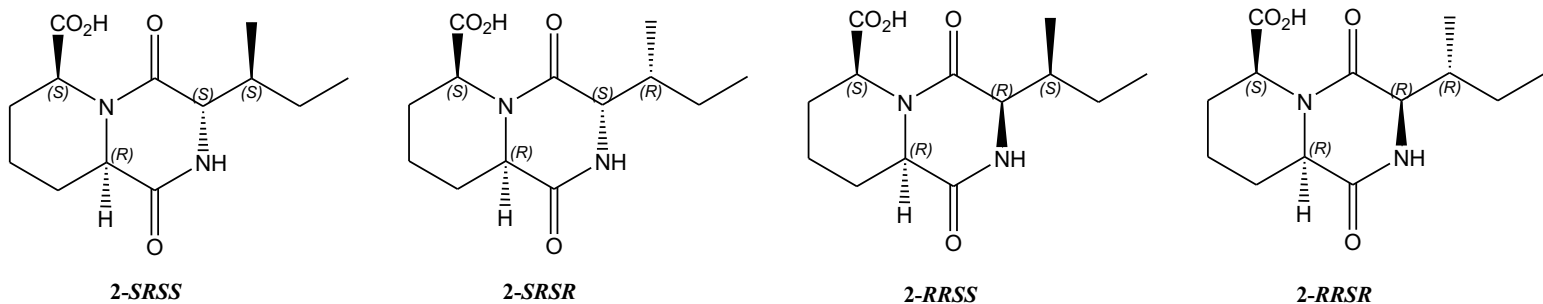

|                  | 2-SRSS | 2-SRSR | 2-RRSS  | 2-RRSR |
|------------------|--------|--------|---------|--------|
| sDP4+ (H data)   | 1.96%  | 0.09%  | 77.91%  | 20.03% |
| sDP4+ (C data)   | 0.00%  | 0.00%  | 98.99%  | 1.01%  |
| sDP4+ (all data) | 0.00%  | 0.00%  | 99.74%  | 0.26%  |
| uDP4+ (H data)   | 2.77%  | 86.55% | 8.12%   | 2.56%  |
| uDP4+ (C data)   | 0.02%  | 0.04%  | 96.13%  | 3.82%  |
| uDP4+ (all data) | 0.01%  | 0.40%  | 98.37%  | 1.23%  |
| DP4+ (H data)    | 0.78%  | 1.16%  | 90.71%  | 7.35%  |
| DP4+ (C data)    | 0.00%  | 0.00%  | 99.96%  | 0.04%  |
| DP4+ (all data)  | 0.00%  | 0.00%  | 100.00% | 0.00%  |

Fig. S20: Marfey analysis of allo-*D*- isoleucine hydrolyzed from 2

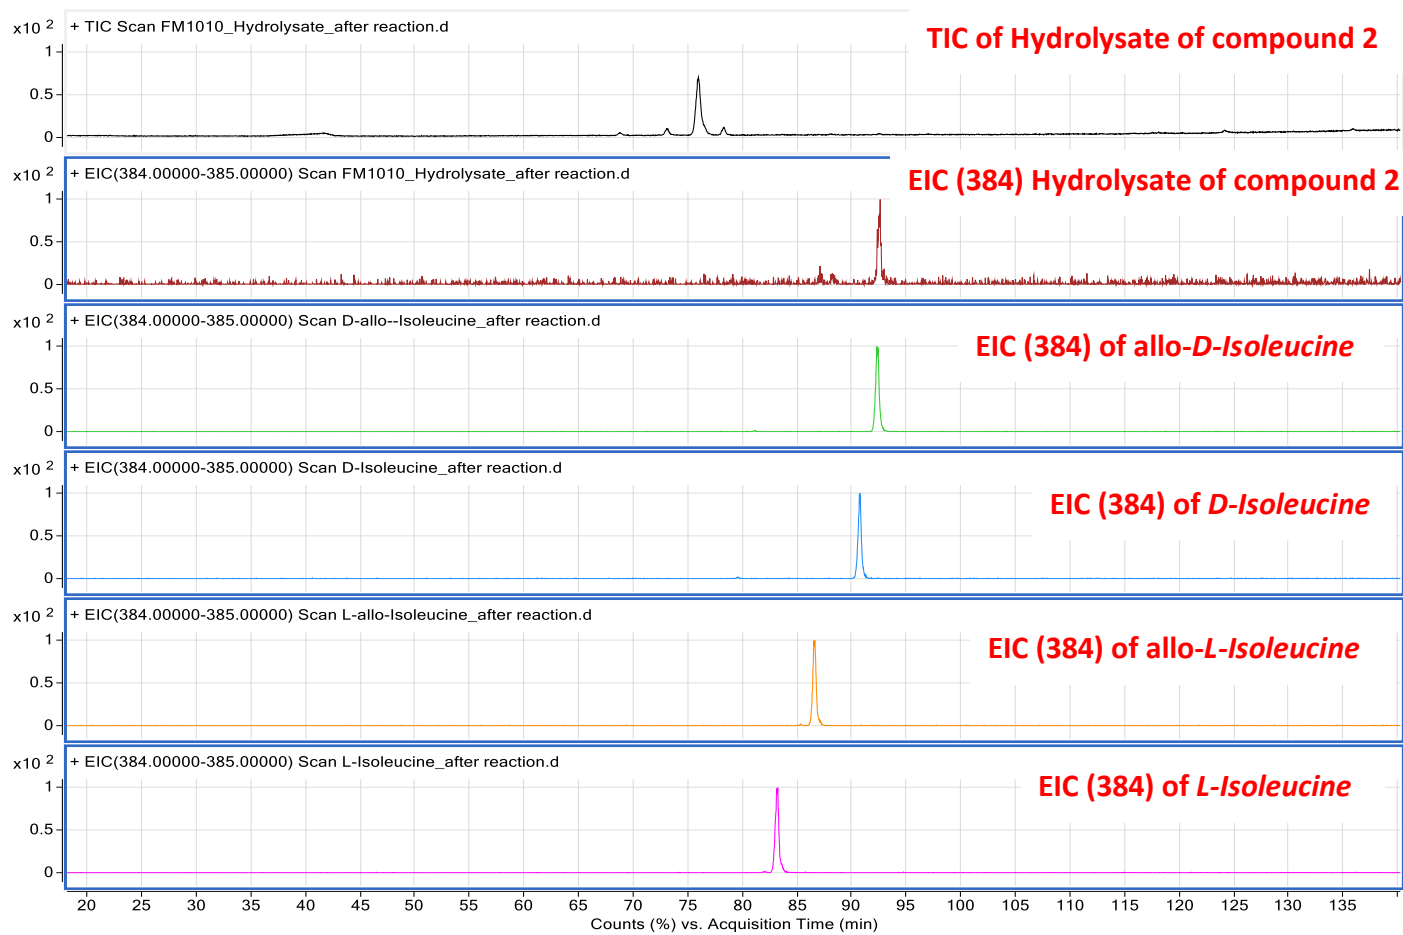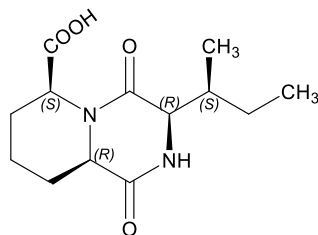

**Fig. S21: Experimental and calculated ECD spectrum of 2**



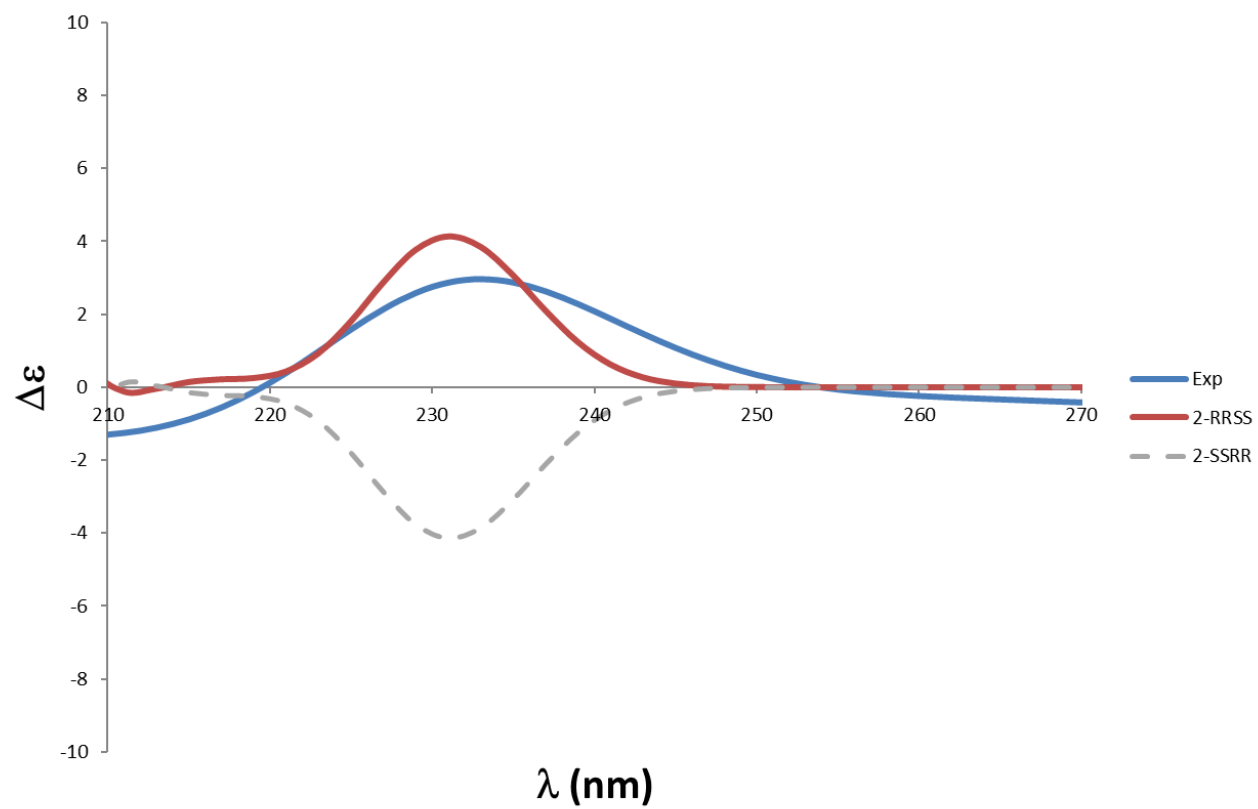

Fig. S22: IR spectrum of compound 2

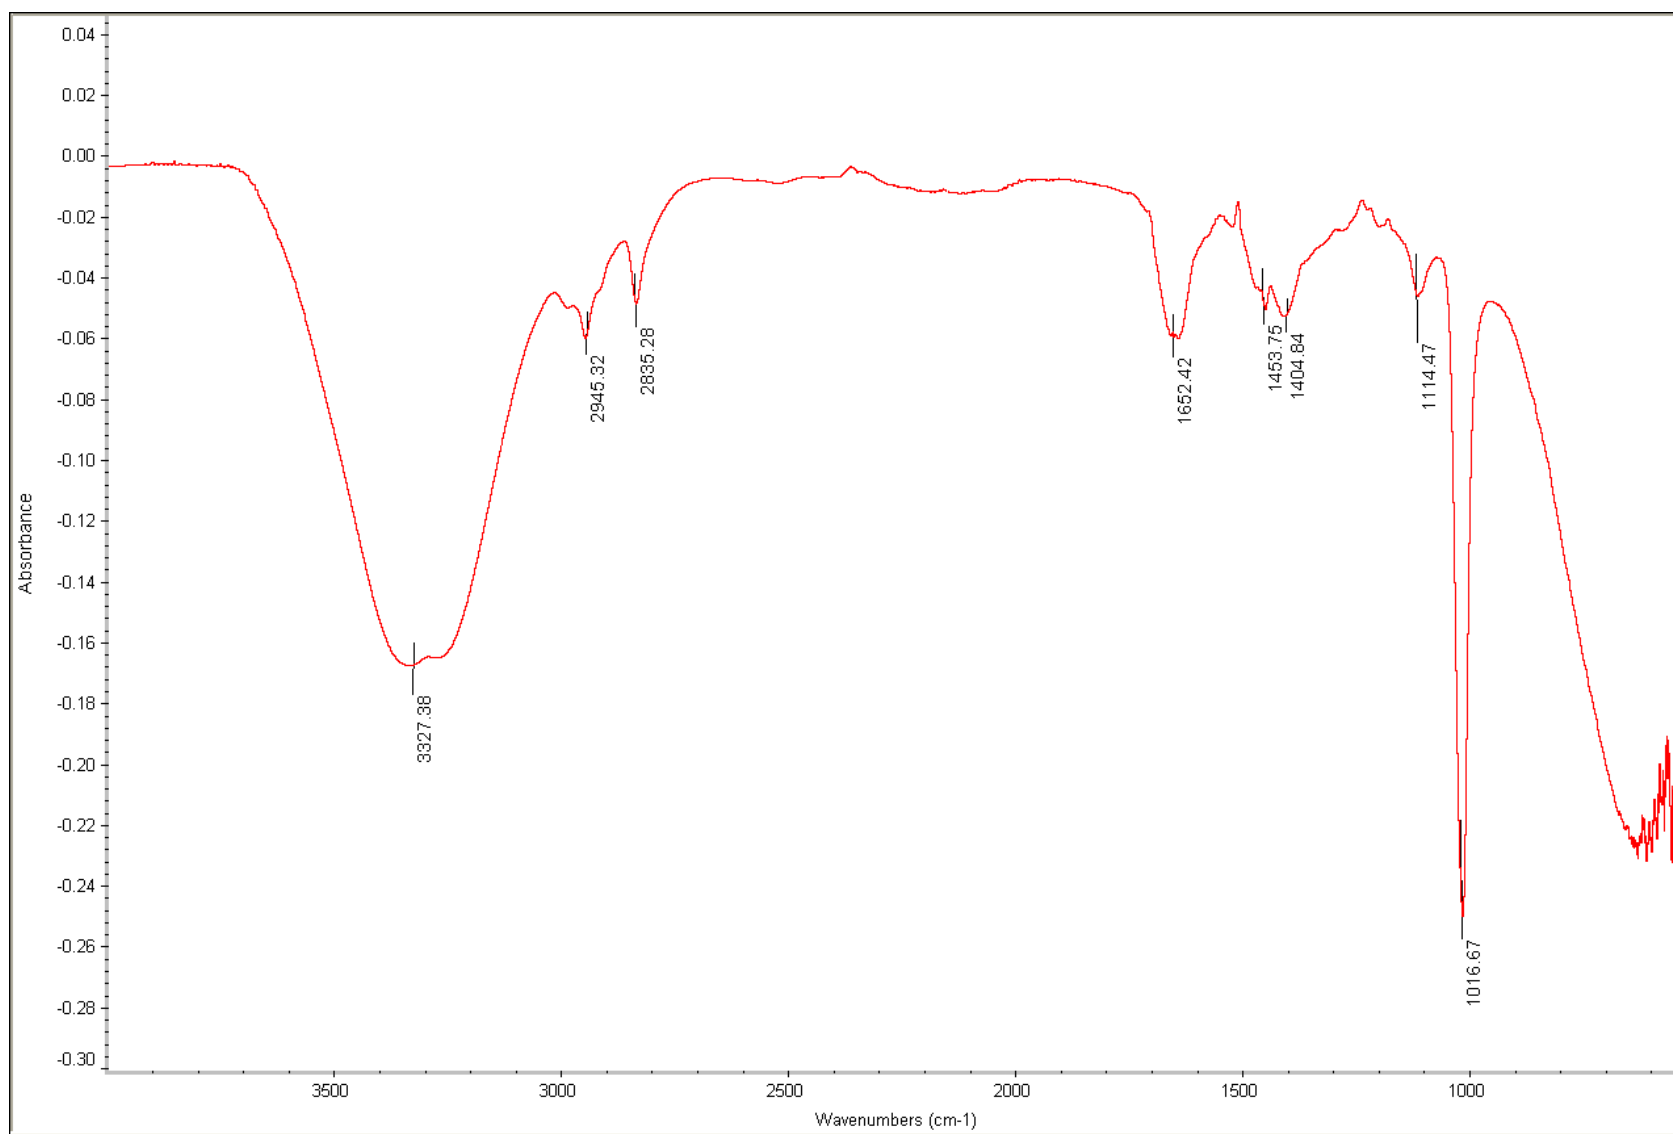

**Fig. S23: HRESIMS of compound 3**

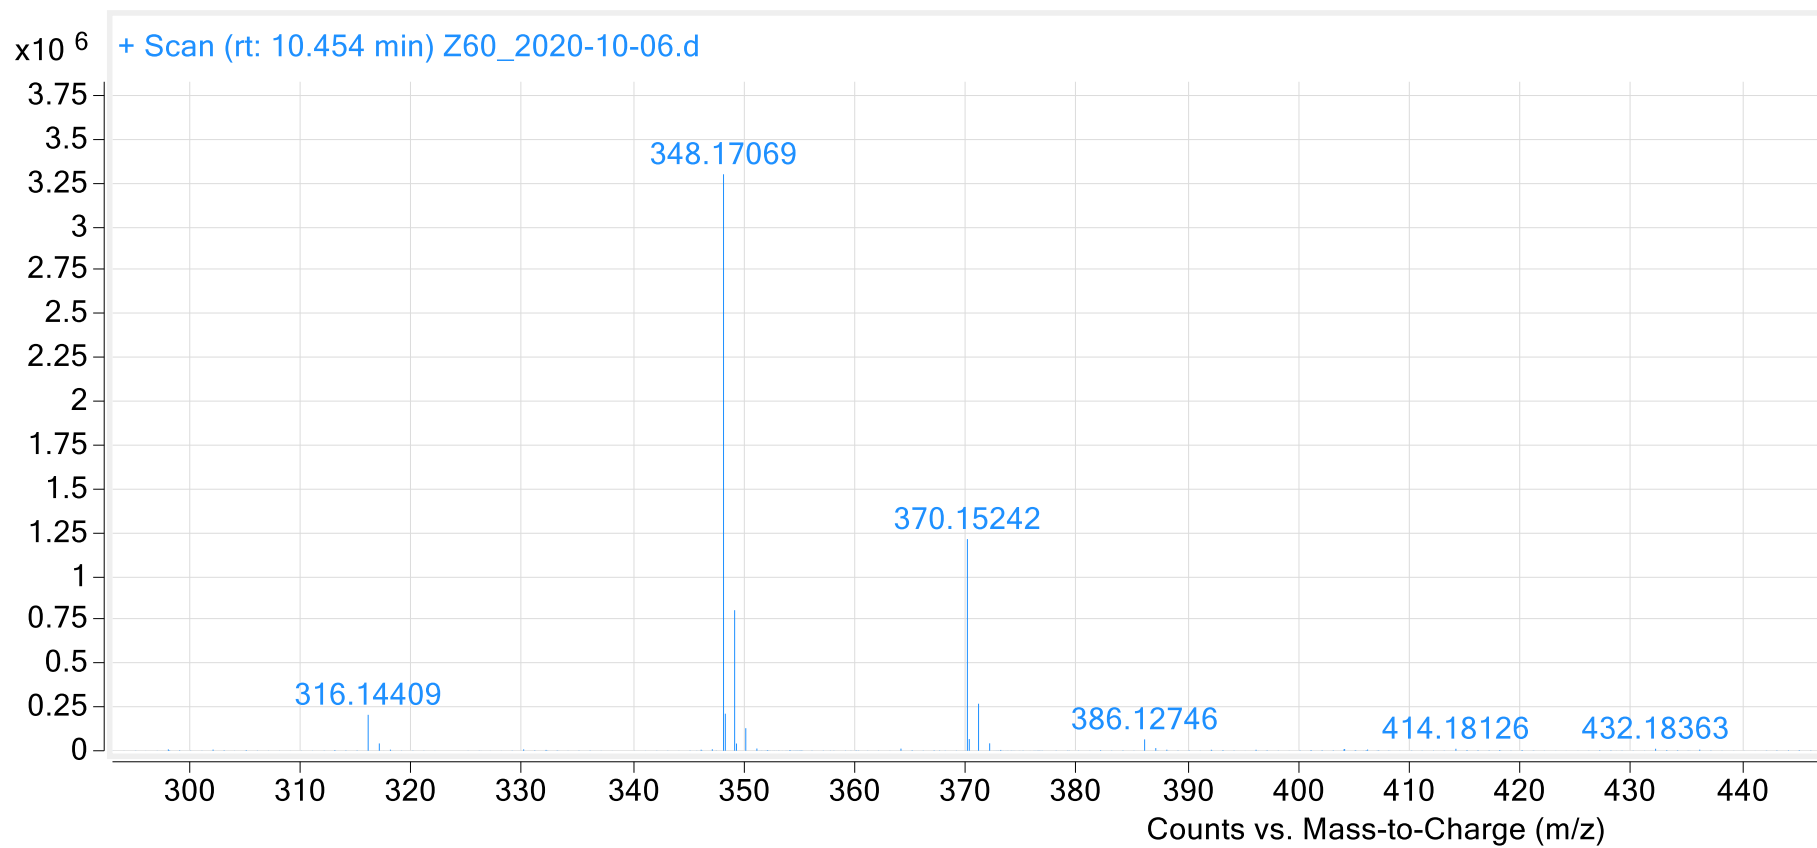

**Fig. S24: <sup>1</sup>H NMR spectrum of compound 3 in CD<sub>3</sub>OD (400MHz)**

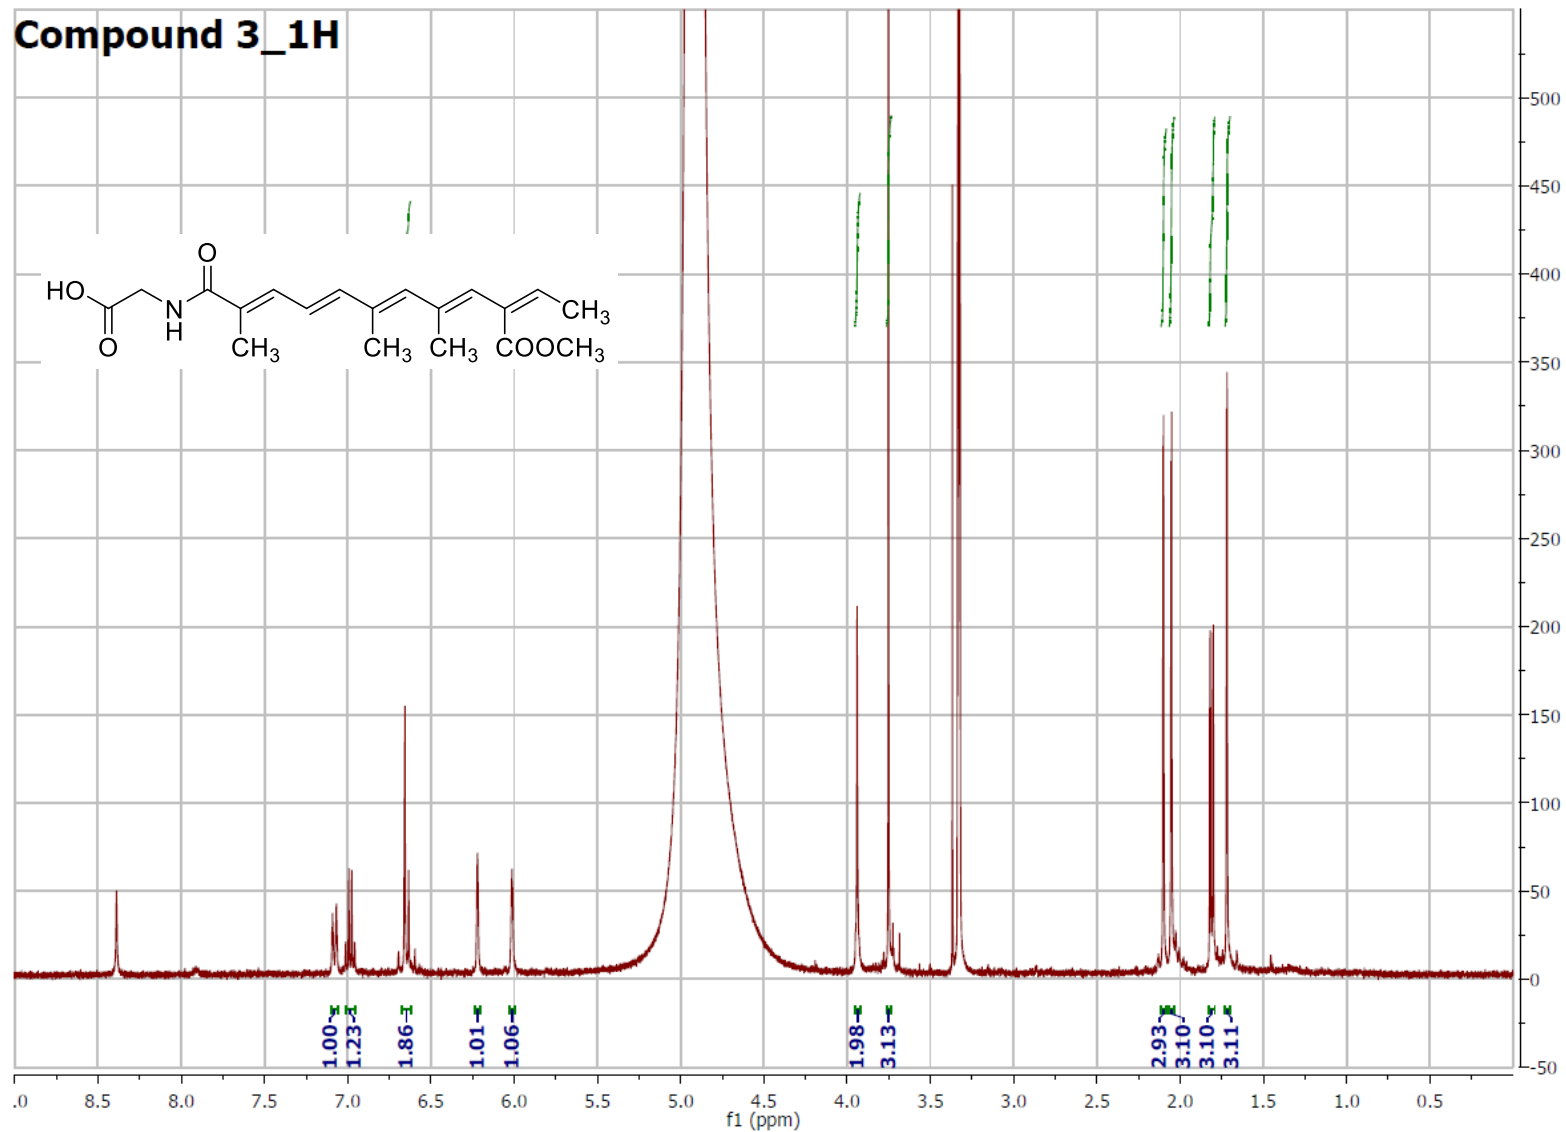

**Fig. S25: DEPTQ NMR spectrum of compound 3 in CD<sub>3</sub>OD (100MHz)**

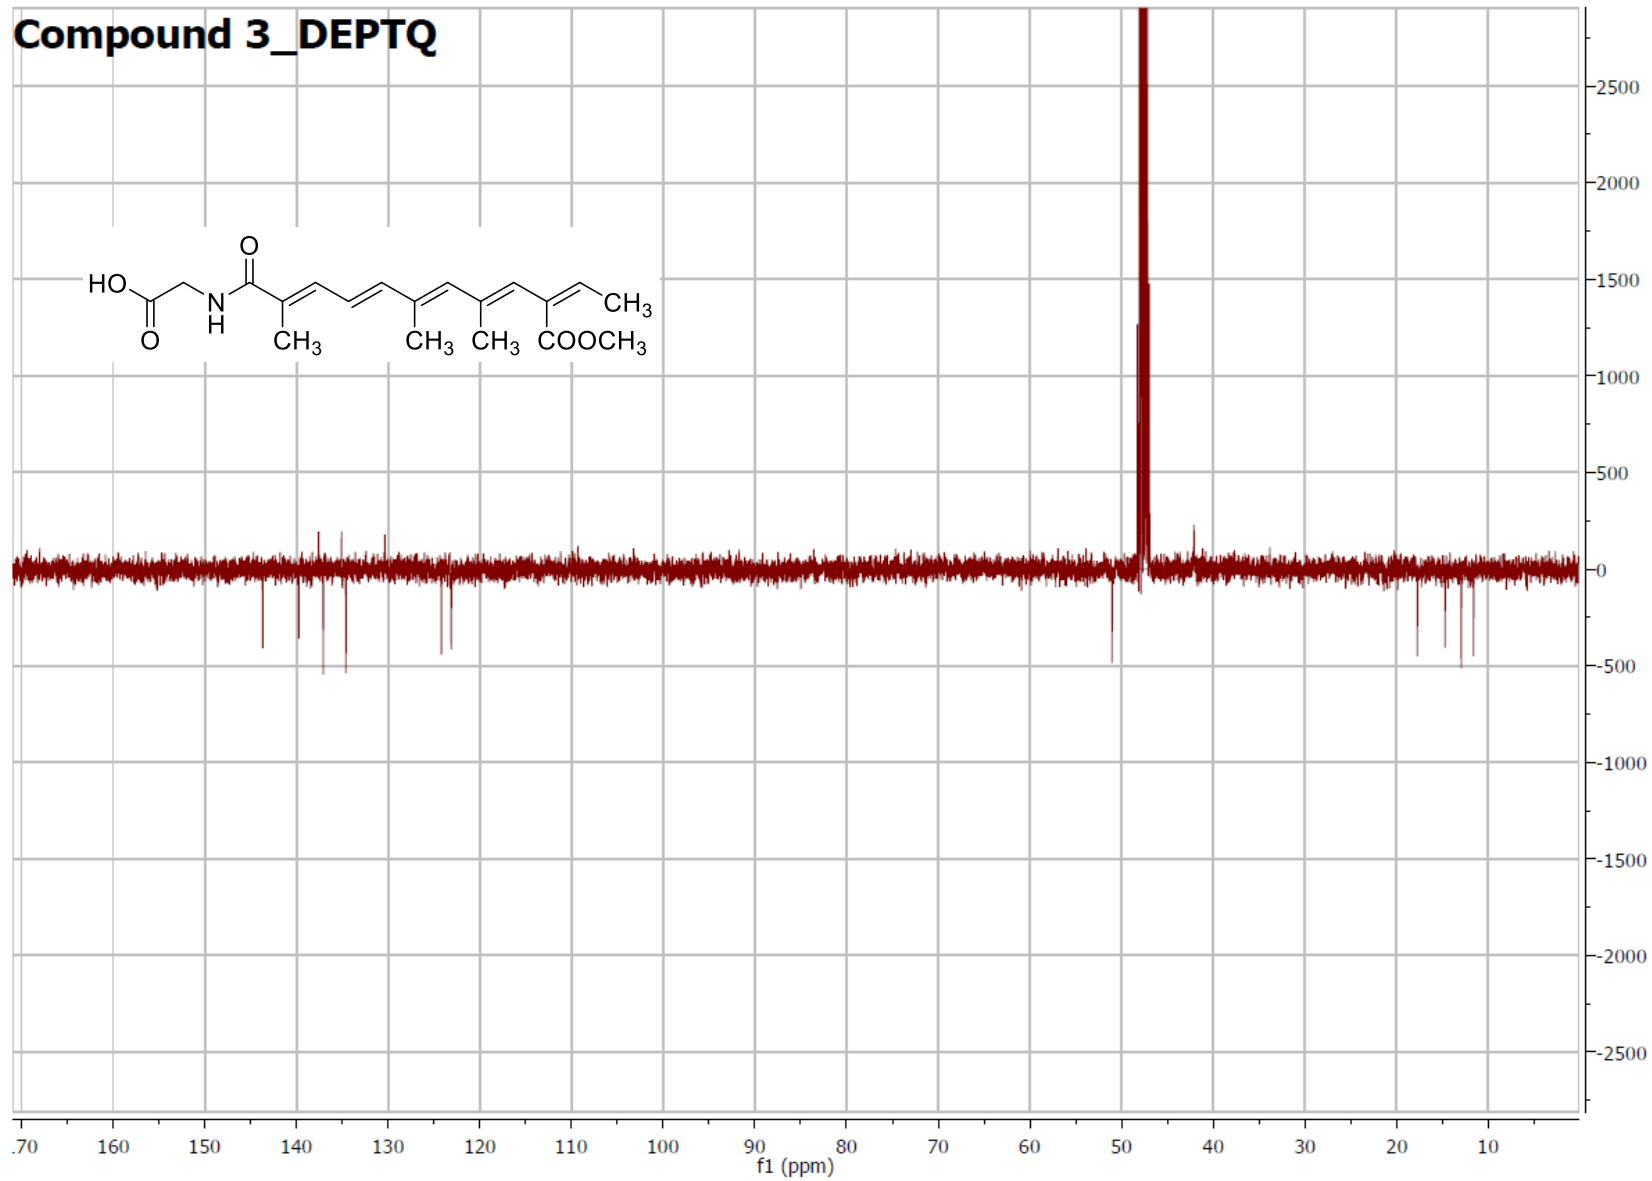

**Fig. S26: HSQC spectrum of compound 3 in CD<sub>3</sub>OD (400MHz)**

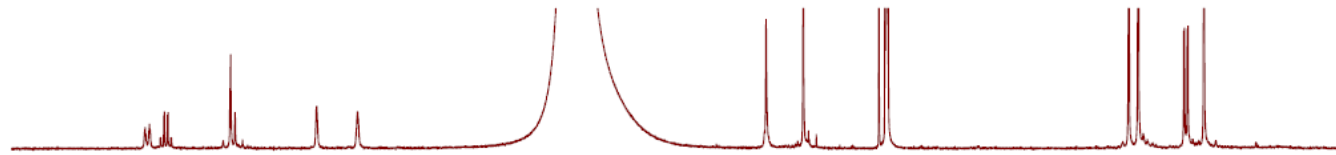

**Compound 3\_HSQC**

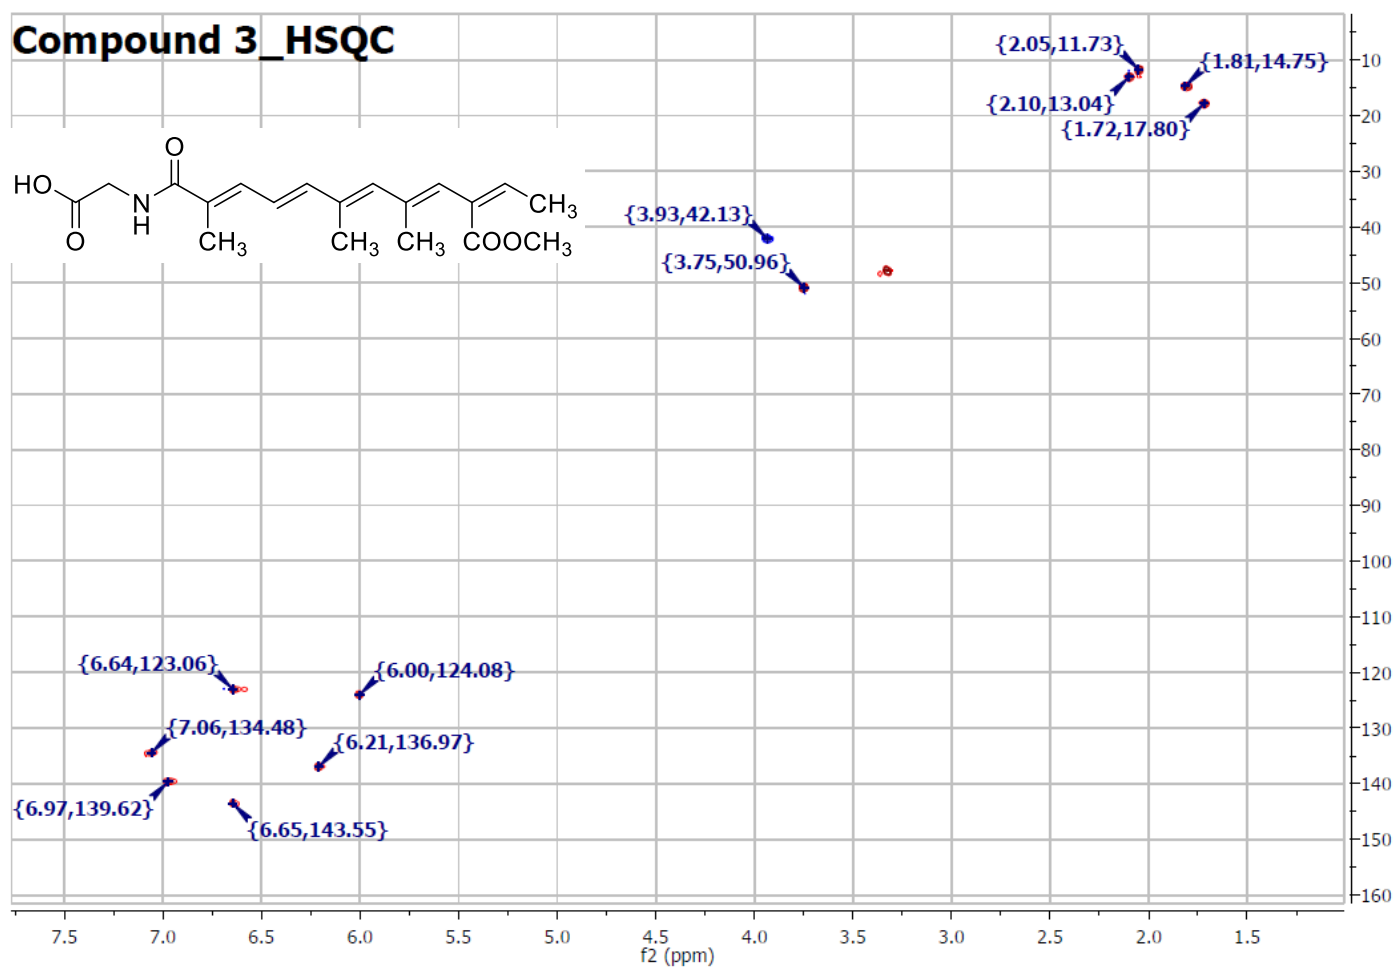

Fig. S27: COSY spectrum of compound 3 in CD<sub>3</sub>OD (400MHz)

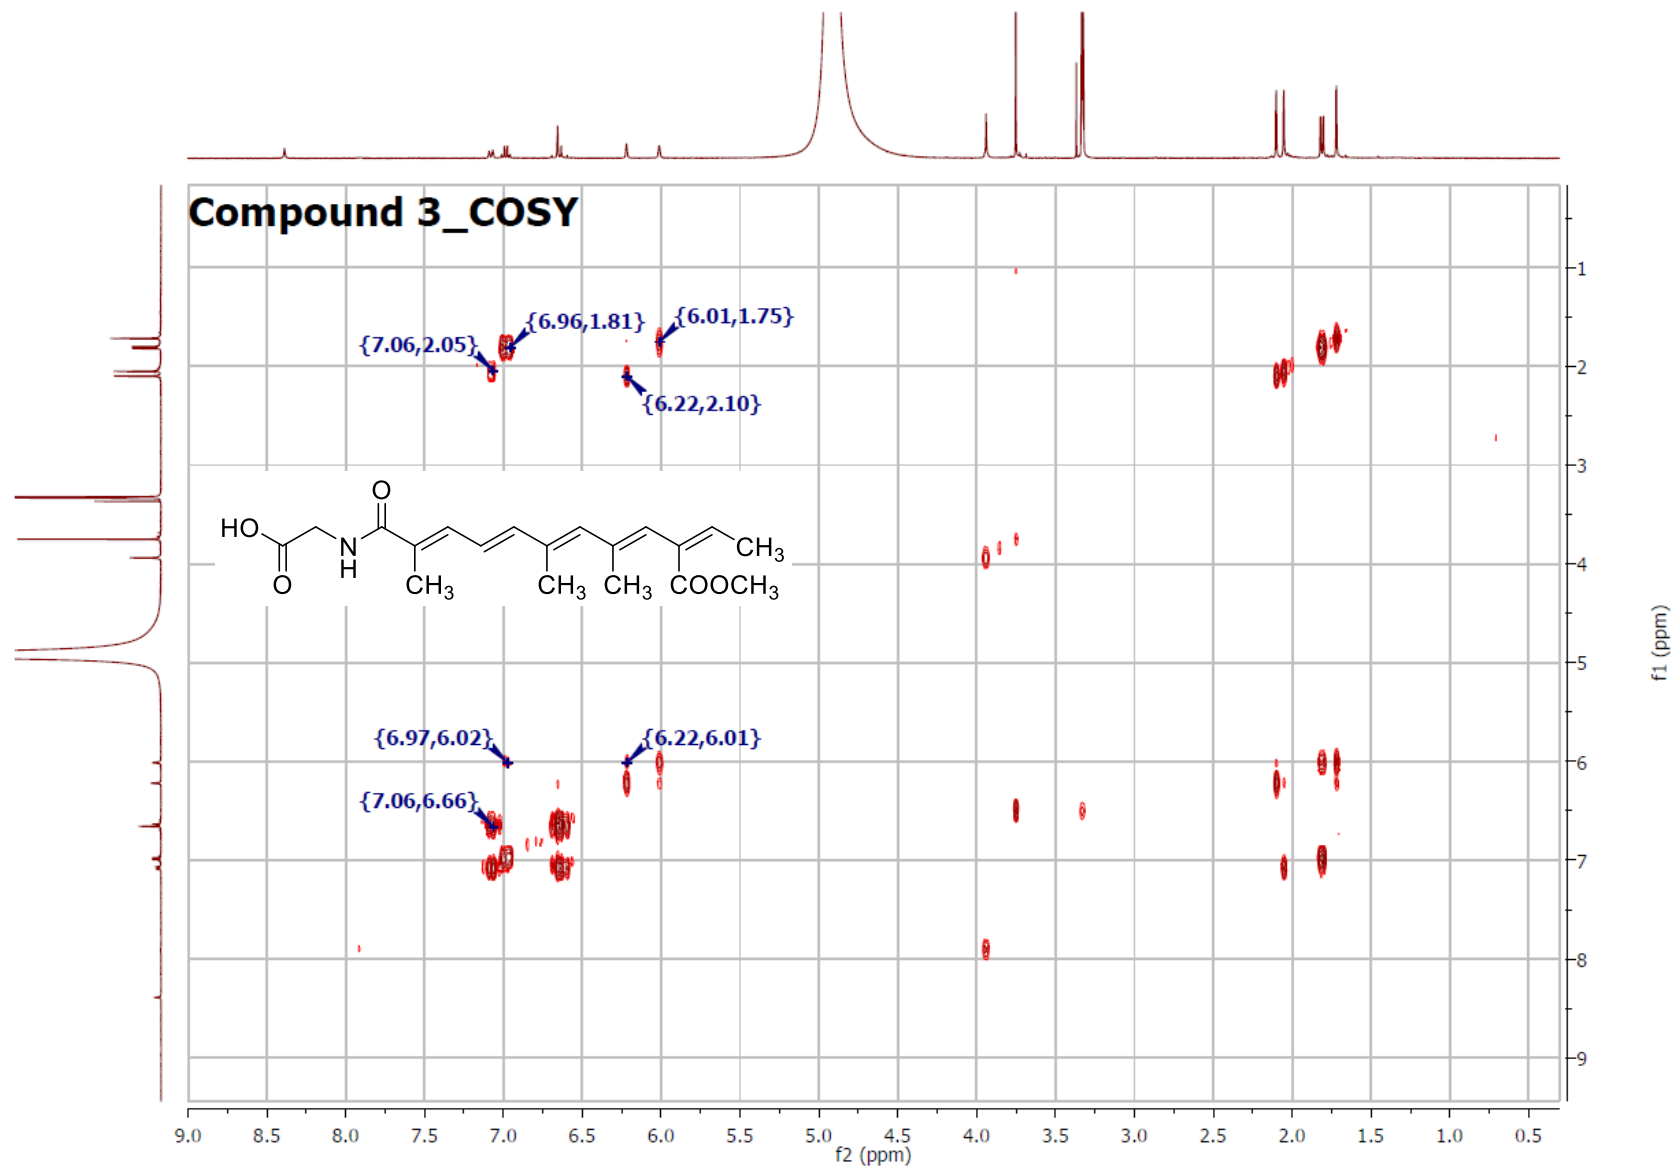

Fig. S28: HMBC spectrum of compound 3 in CD<sub>3</sub>OD (400MHz)

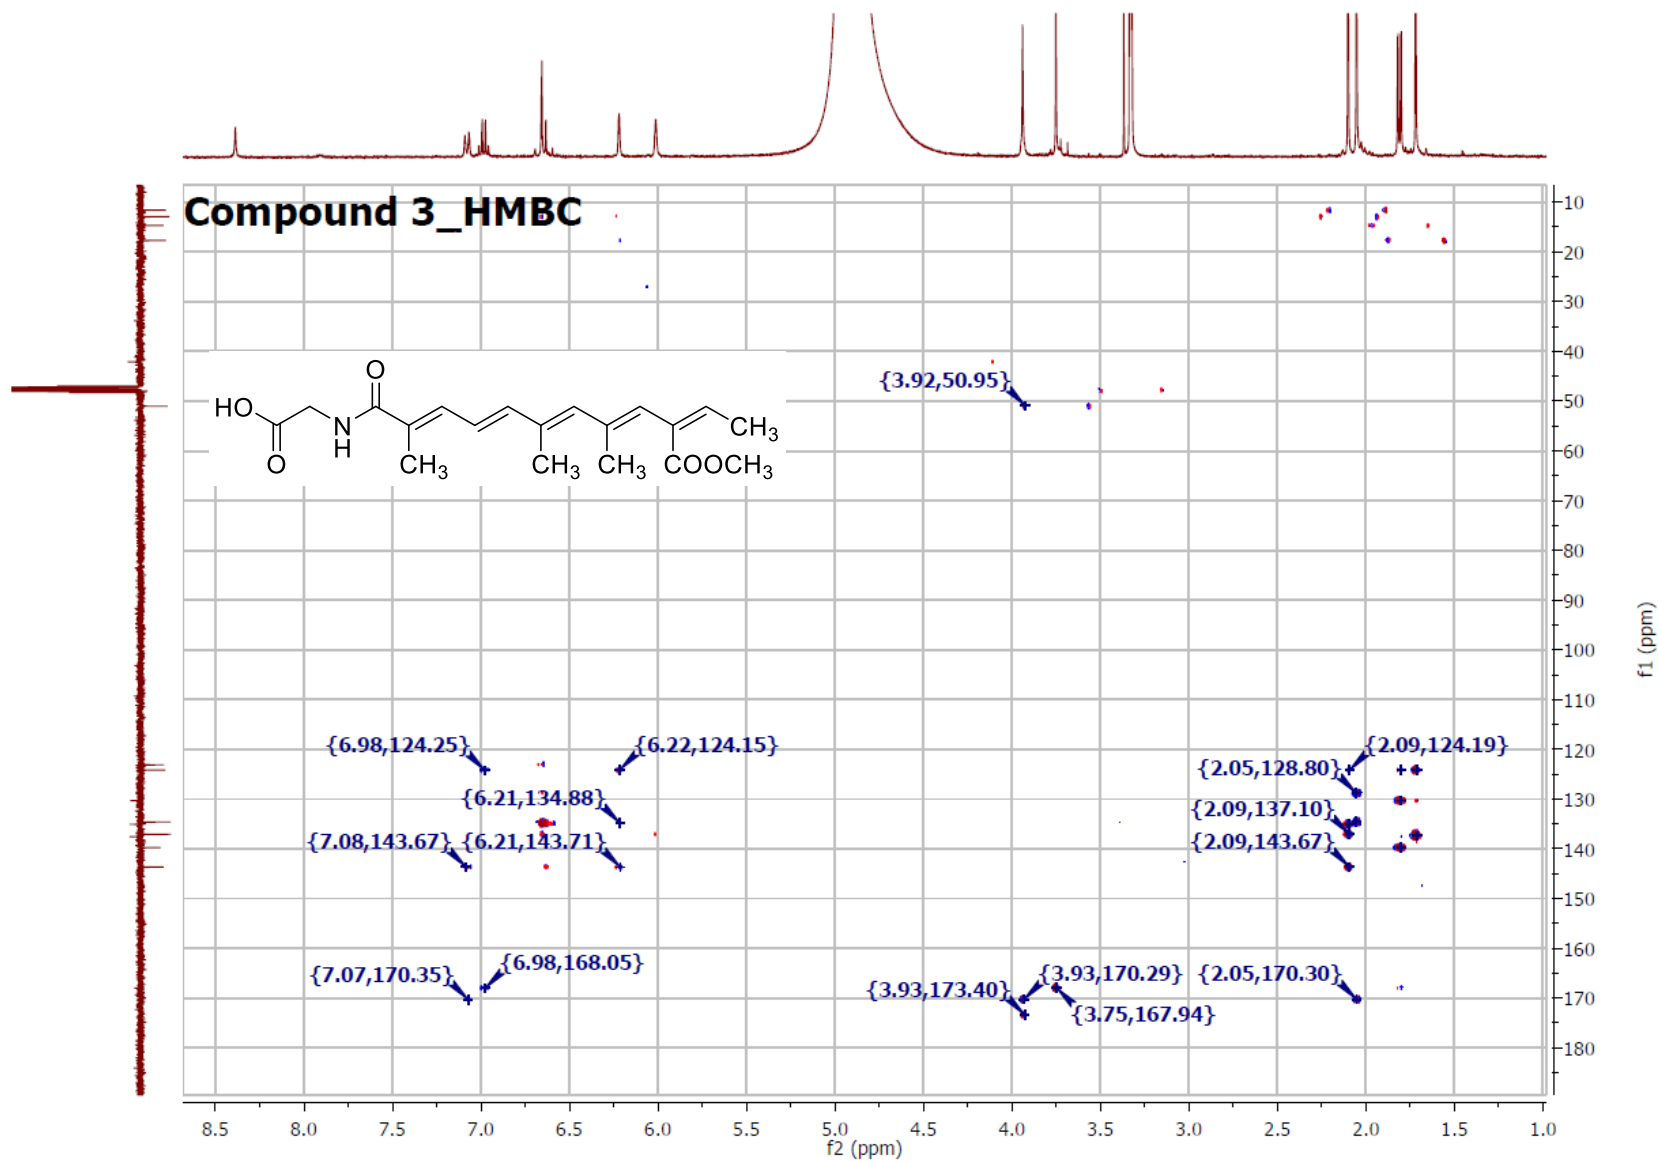



Fig. S29: ROESY spectrum of compound 3 in CD<sub>3</sub>OD (400MHz)

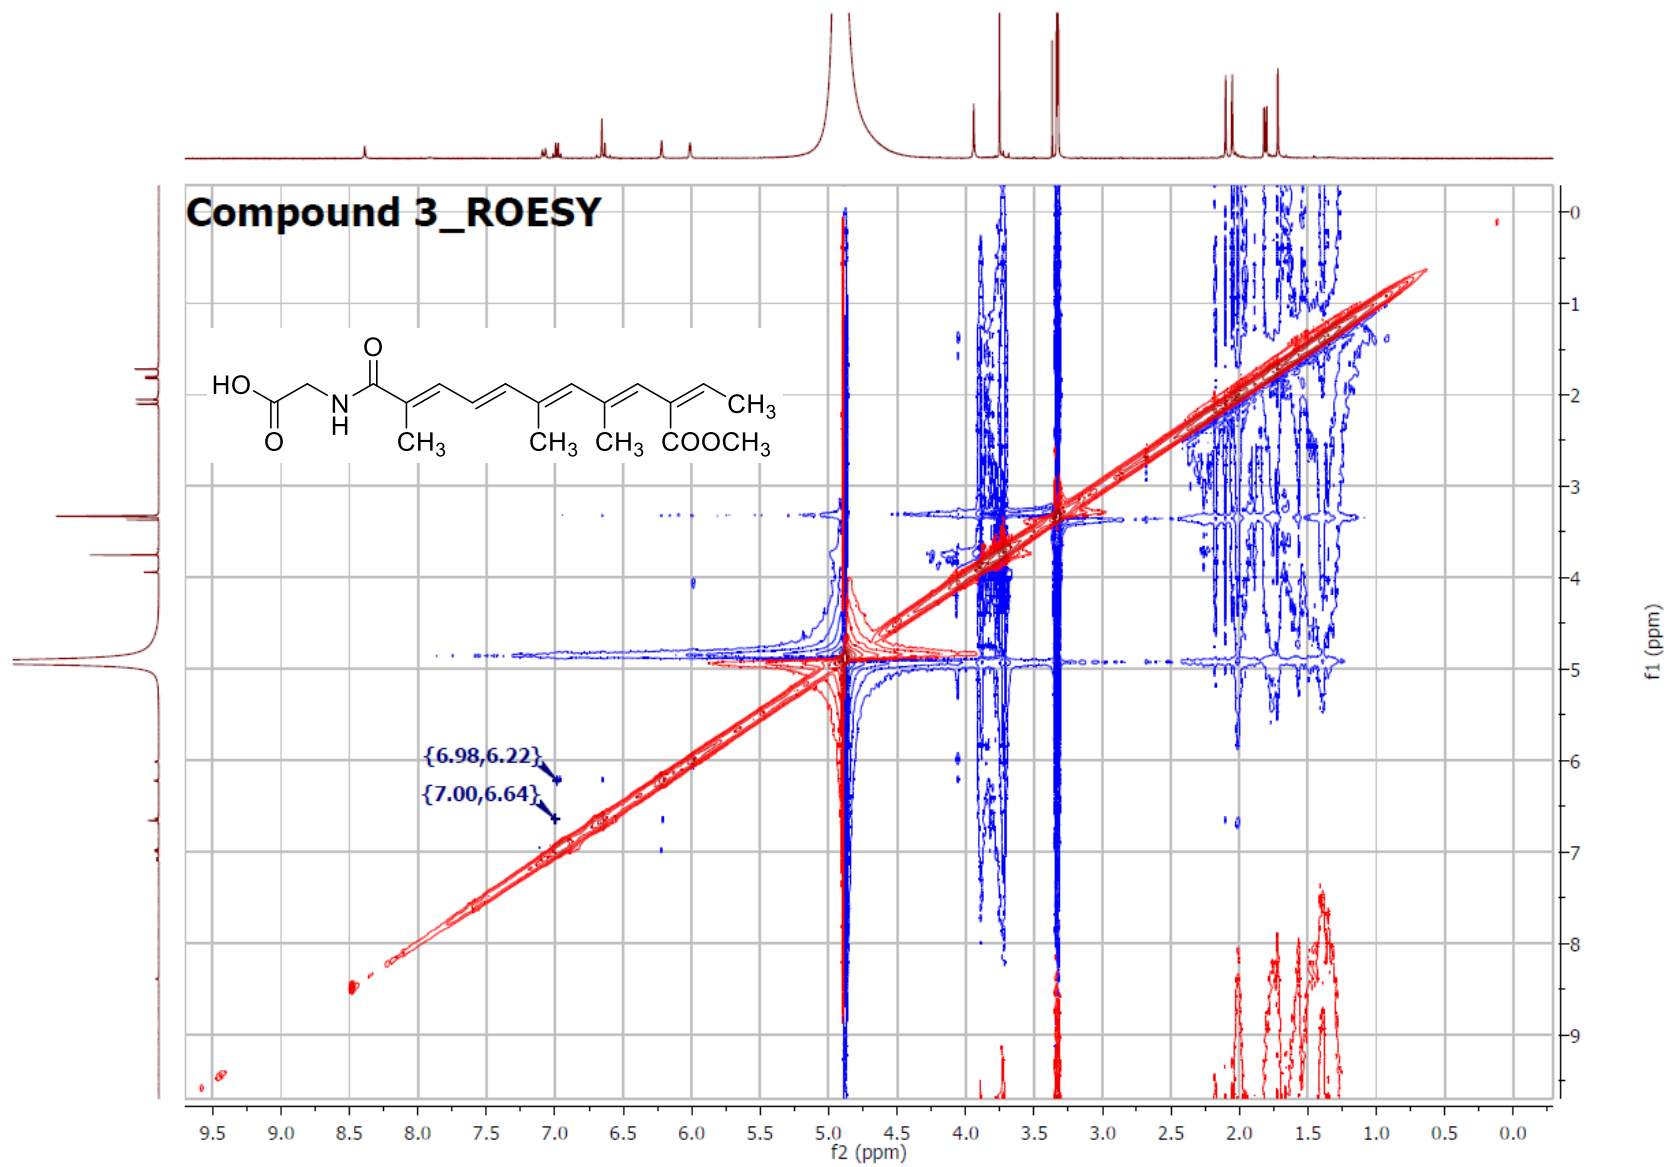

**Fig. S30: IR spectrum of compound 3**

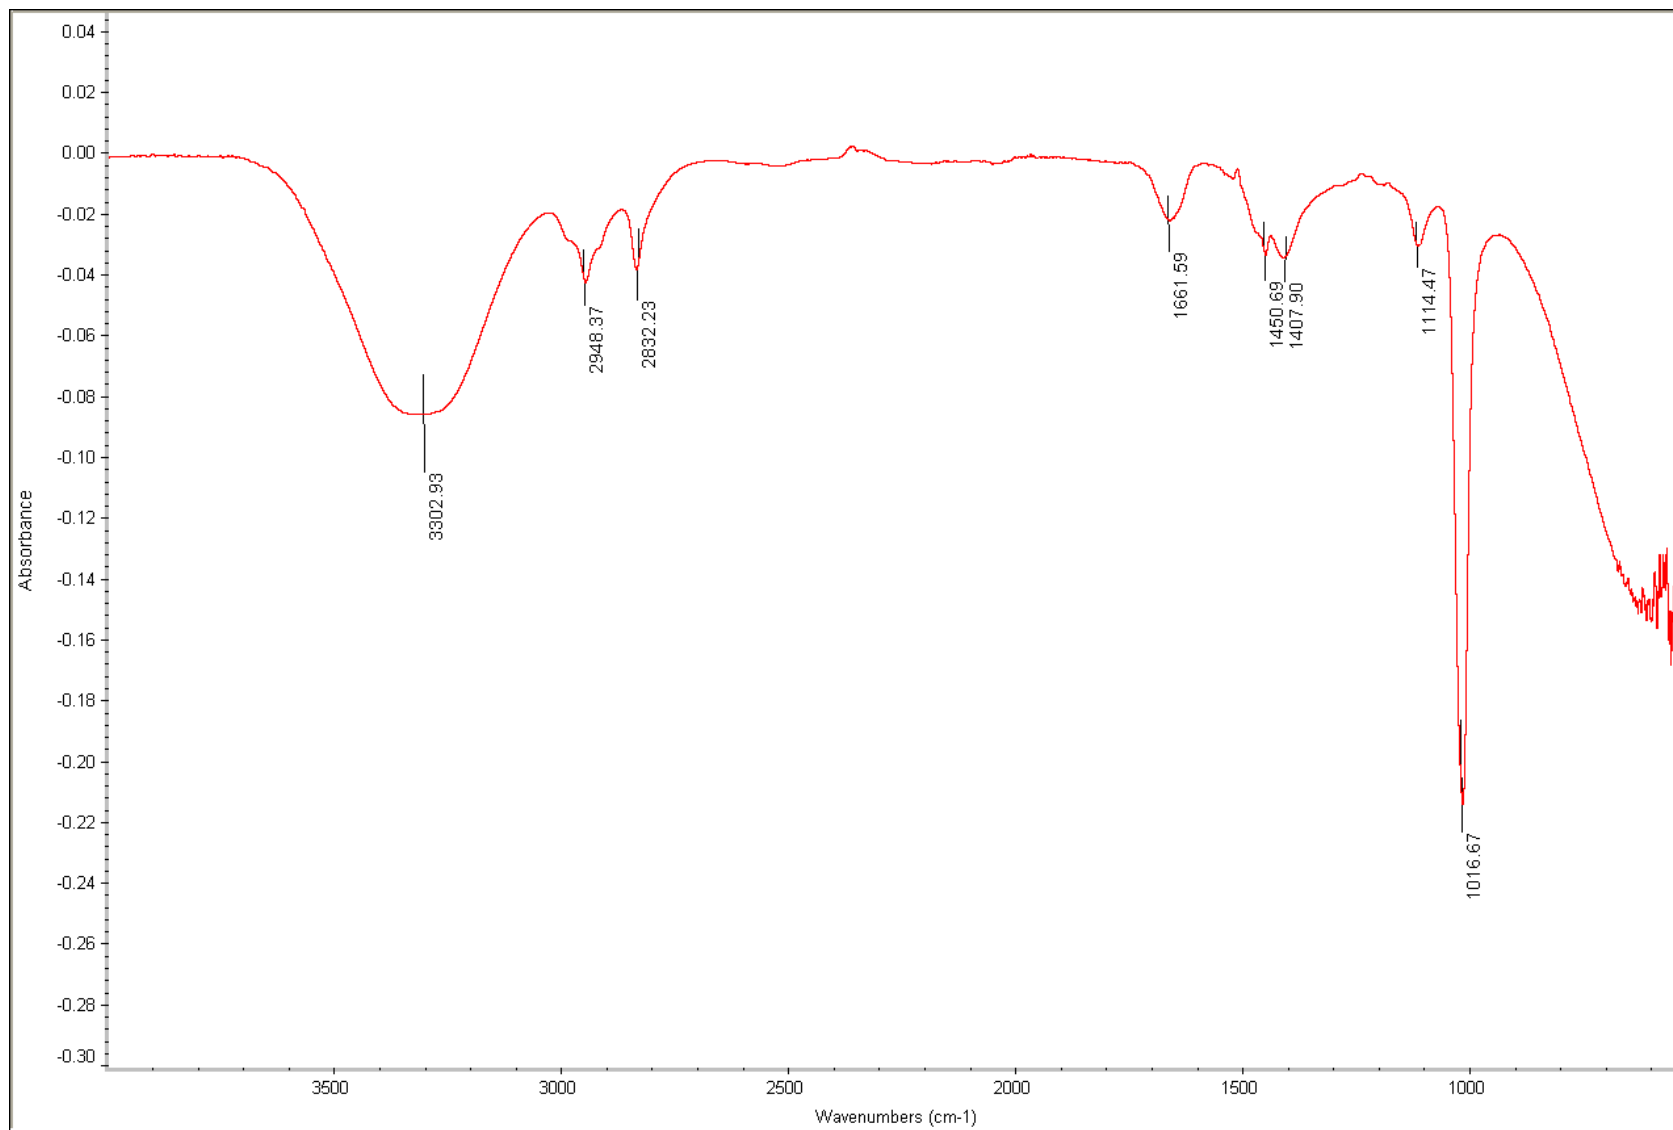

**Fig. S31: HRESIMS of compound 4**

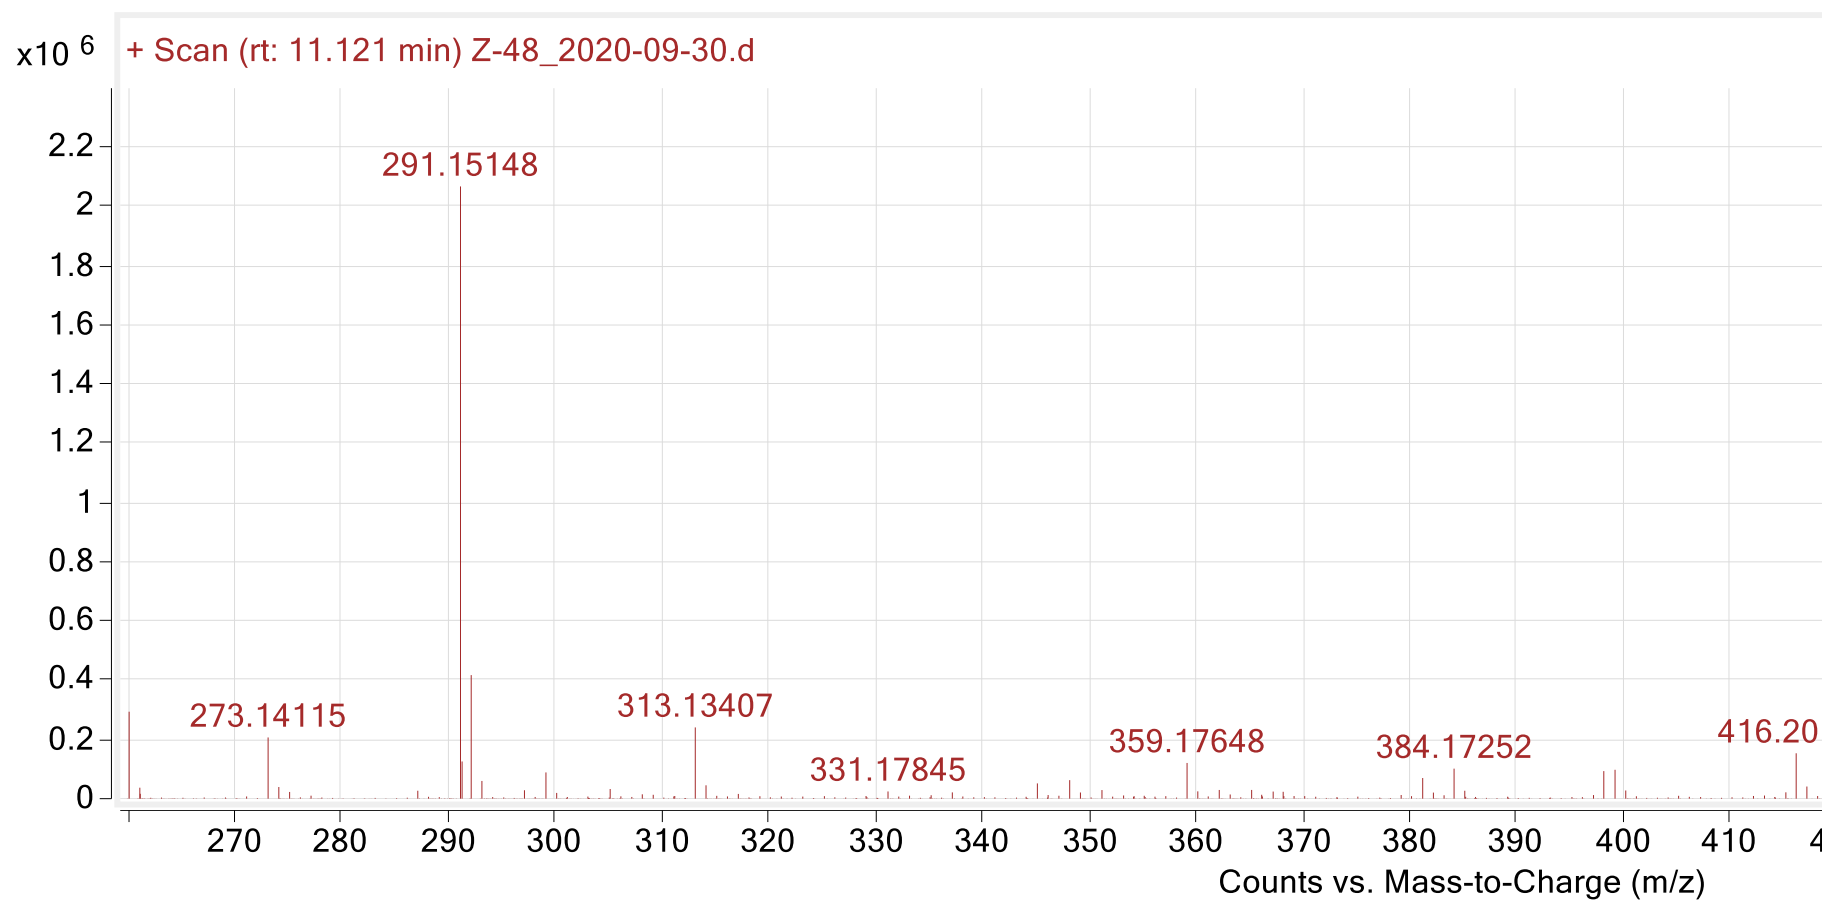

Fig. S32: <sup>1</sup>H NMR spectrum of compound 4 in CD<sub>3</sub>OD (400MHz)

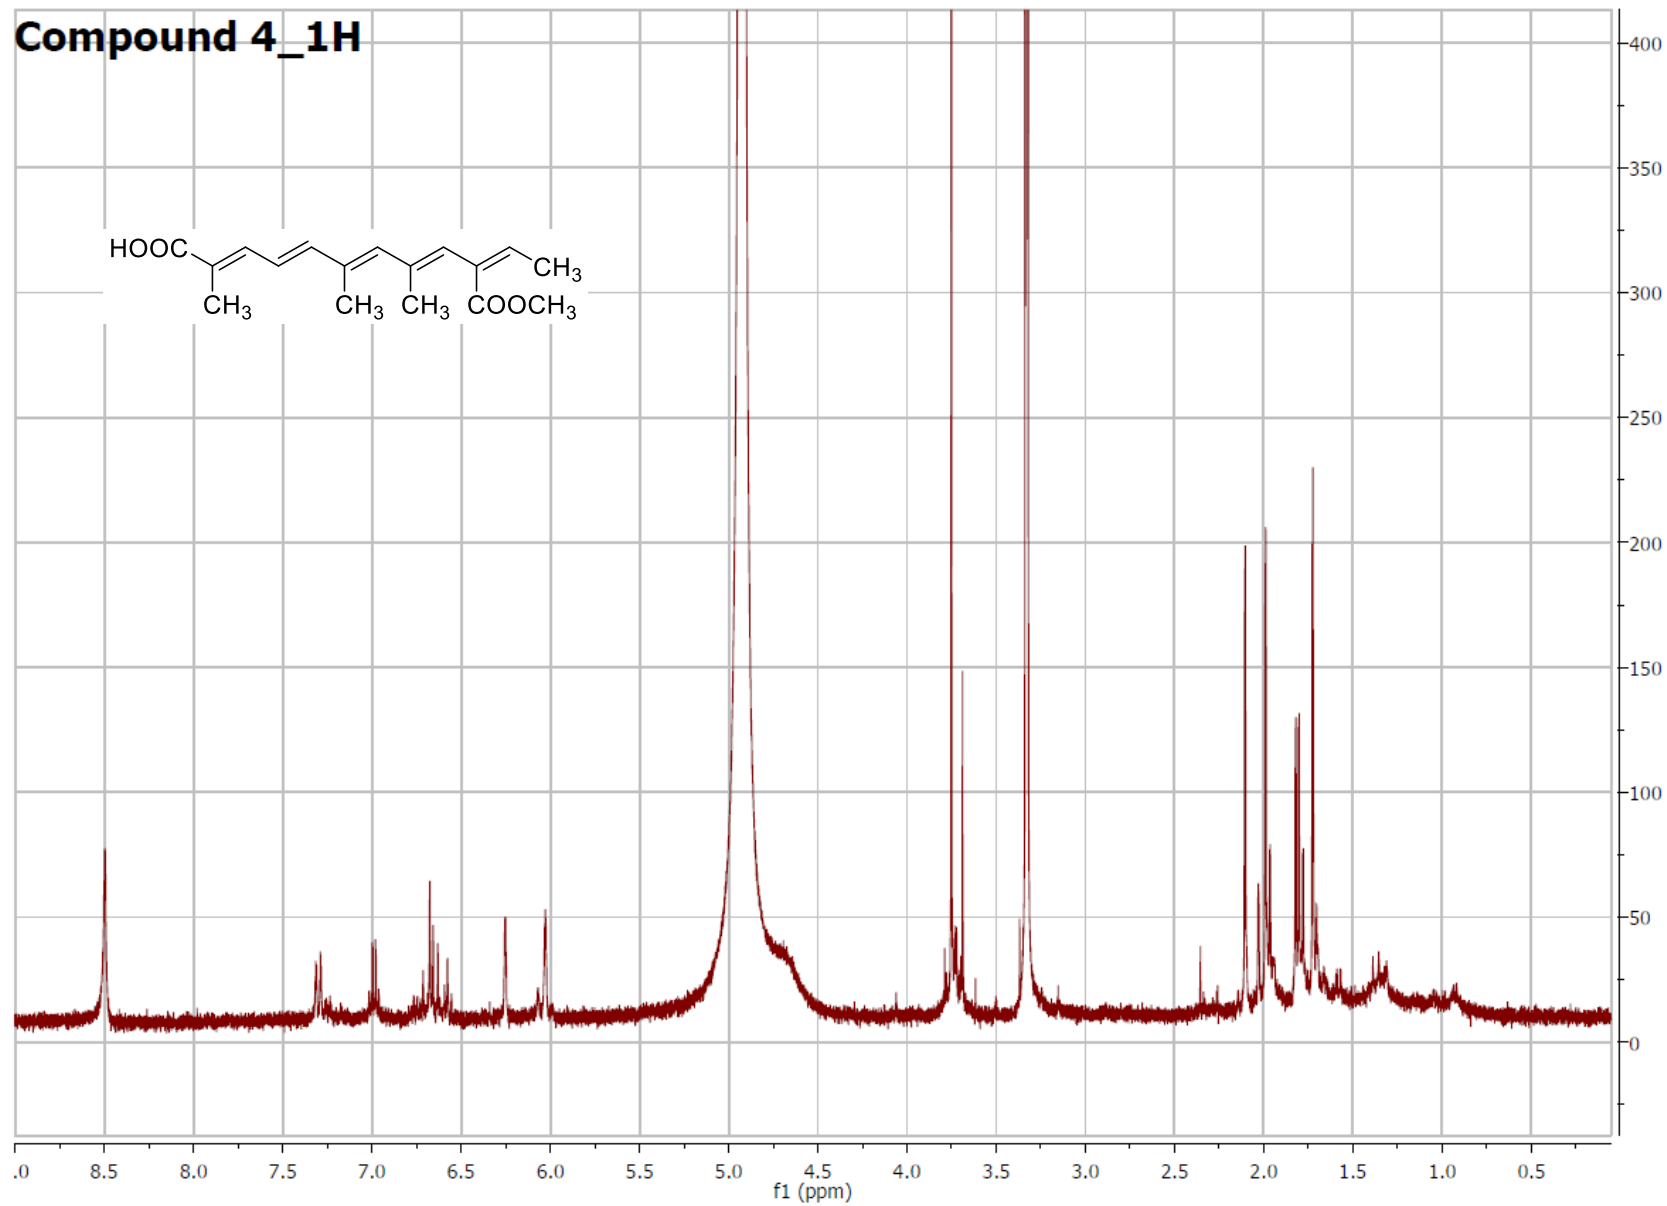

Fig. S33: HSQC spectrum of compound 4 in CD<sub>3</sub>OD (400MHz)

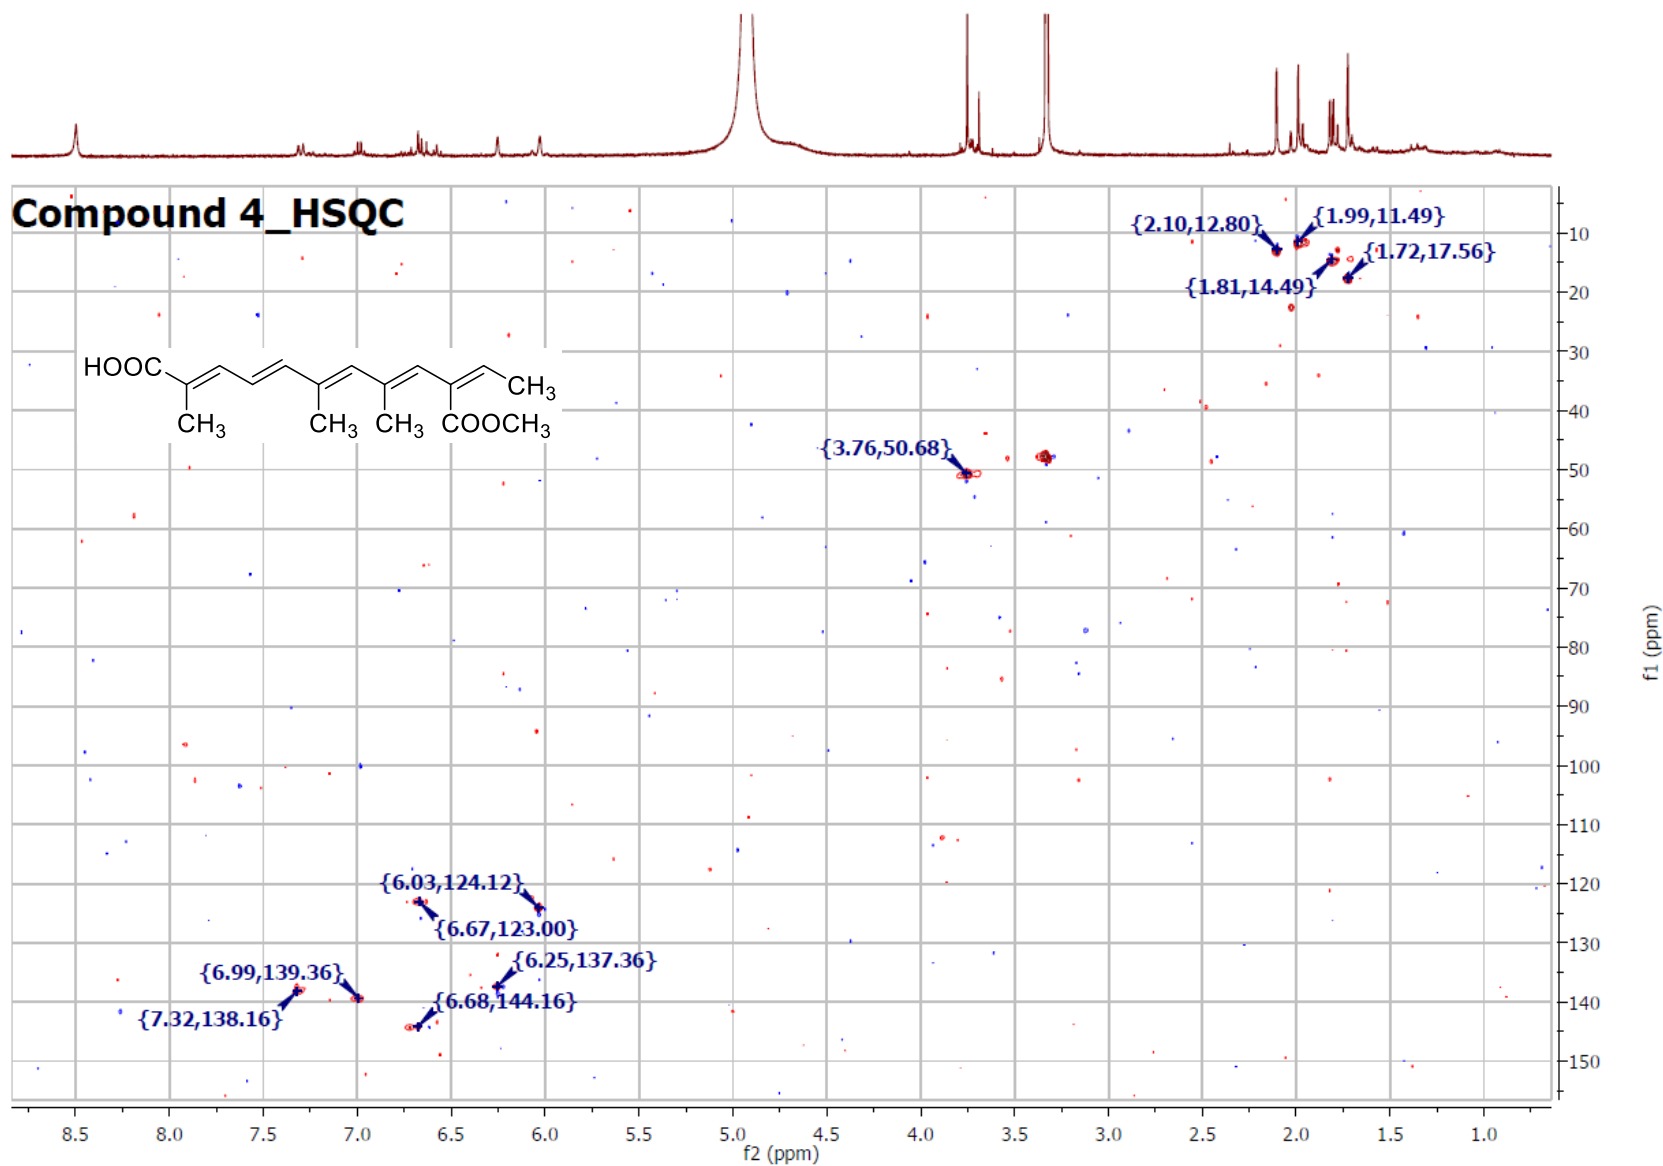

Fig. S34: COSY spectrum of compound 4 in CD<sub>3</sub>OD (400MHz)

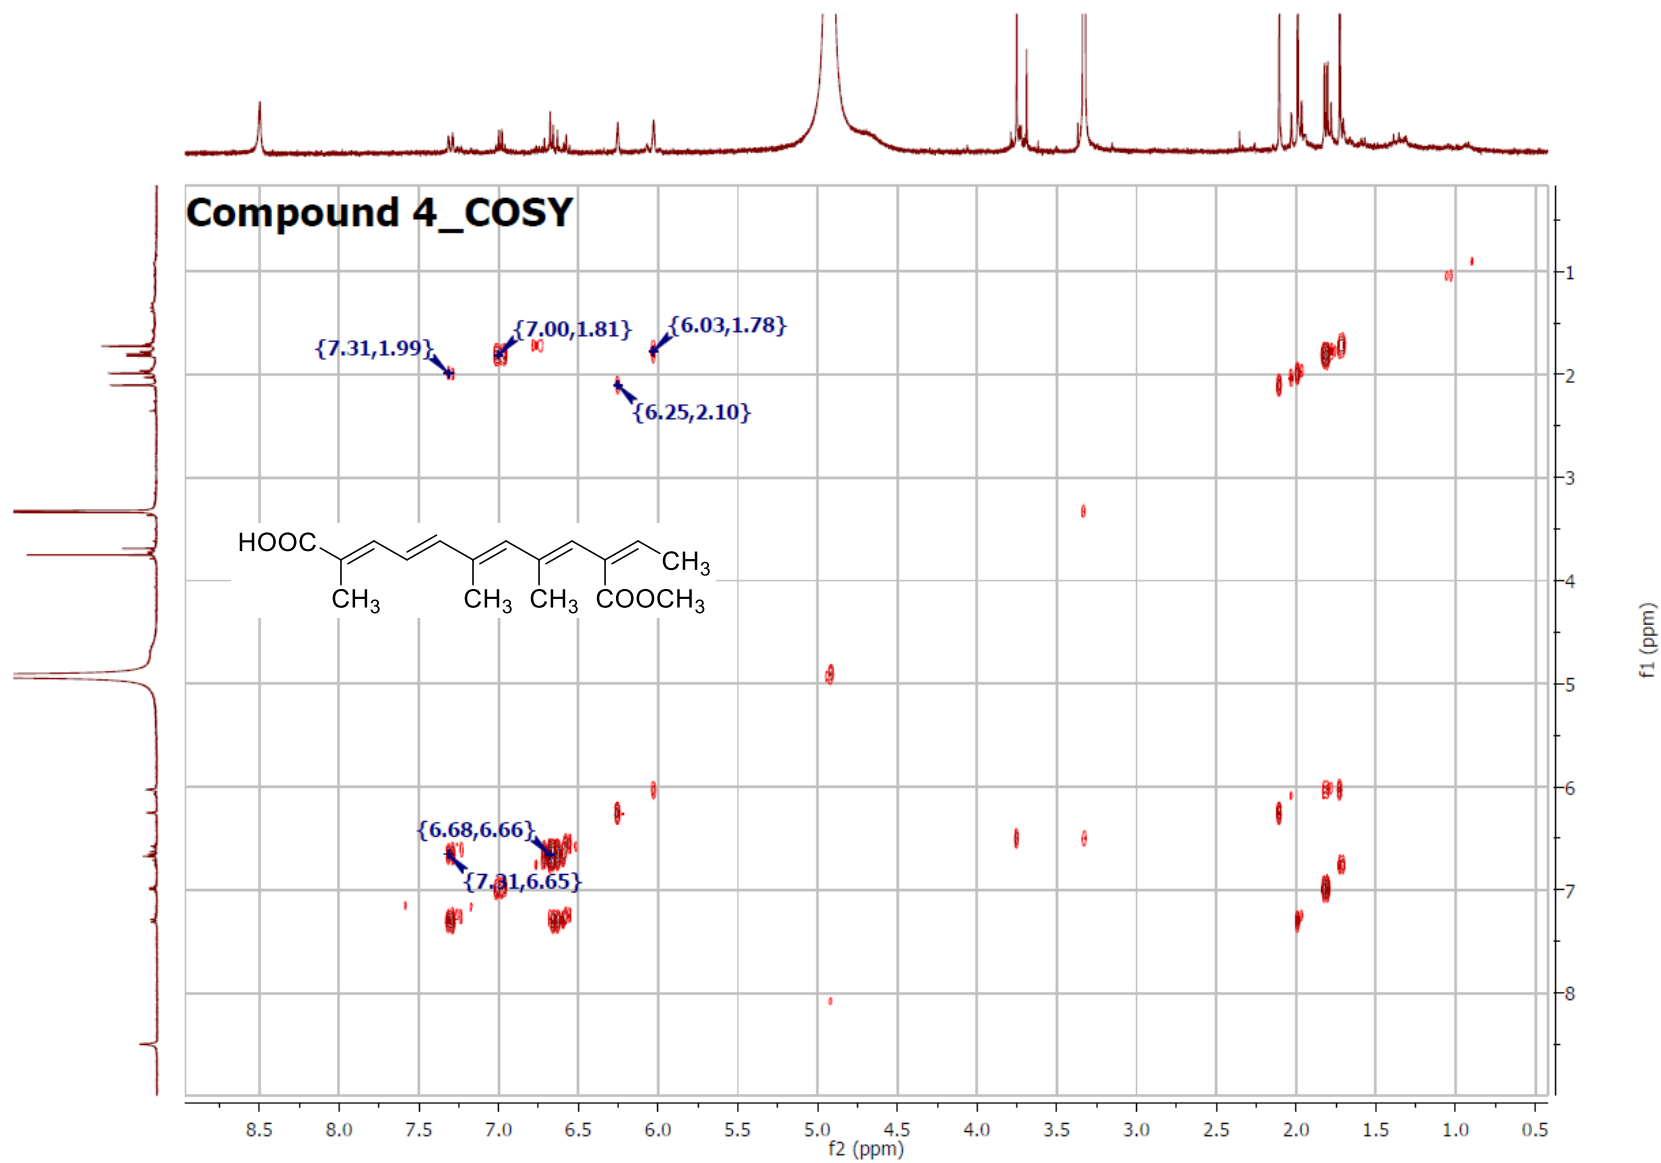

Fig. S35: HMBC spectrum of compound 4 in CD<sub>3</sub>OD (400MHz)

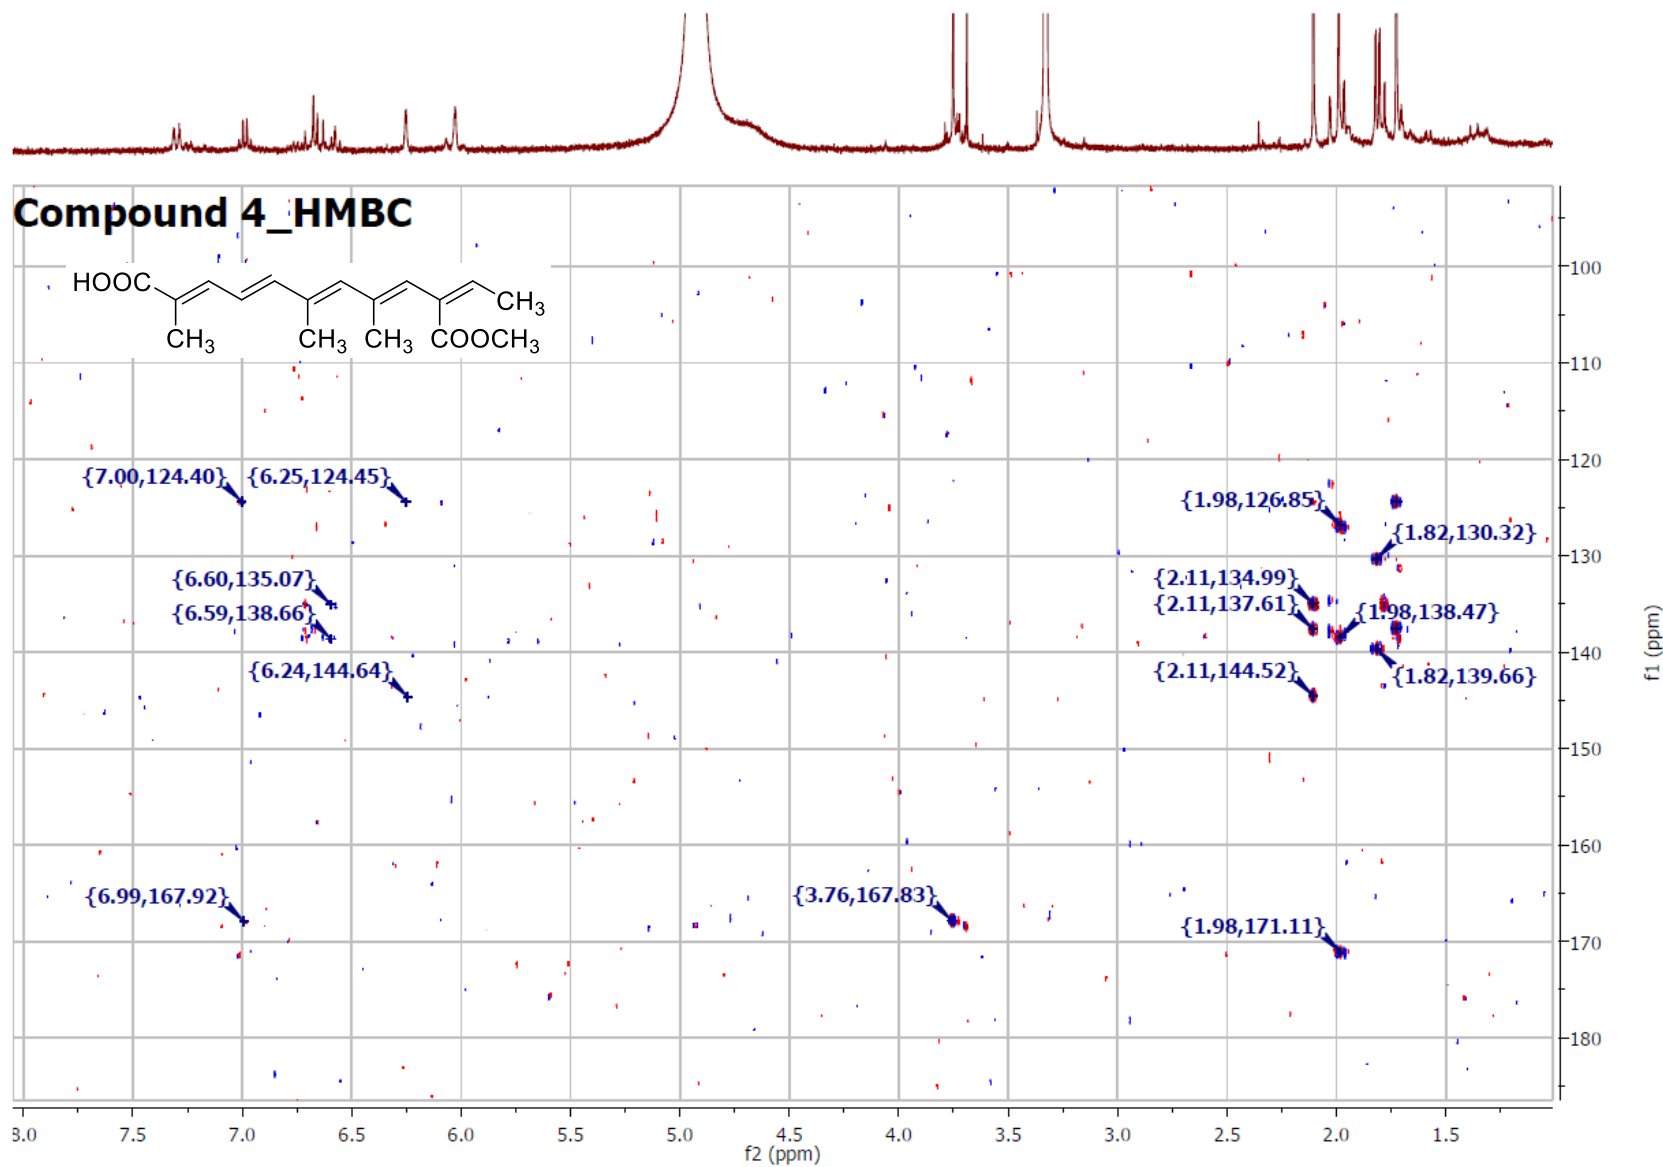





**Fig. S37: IR spectrum of compound 4**

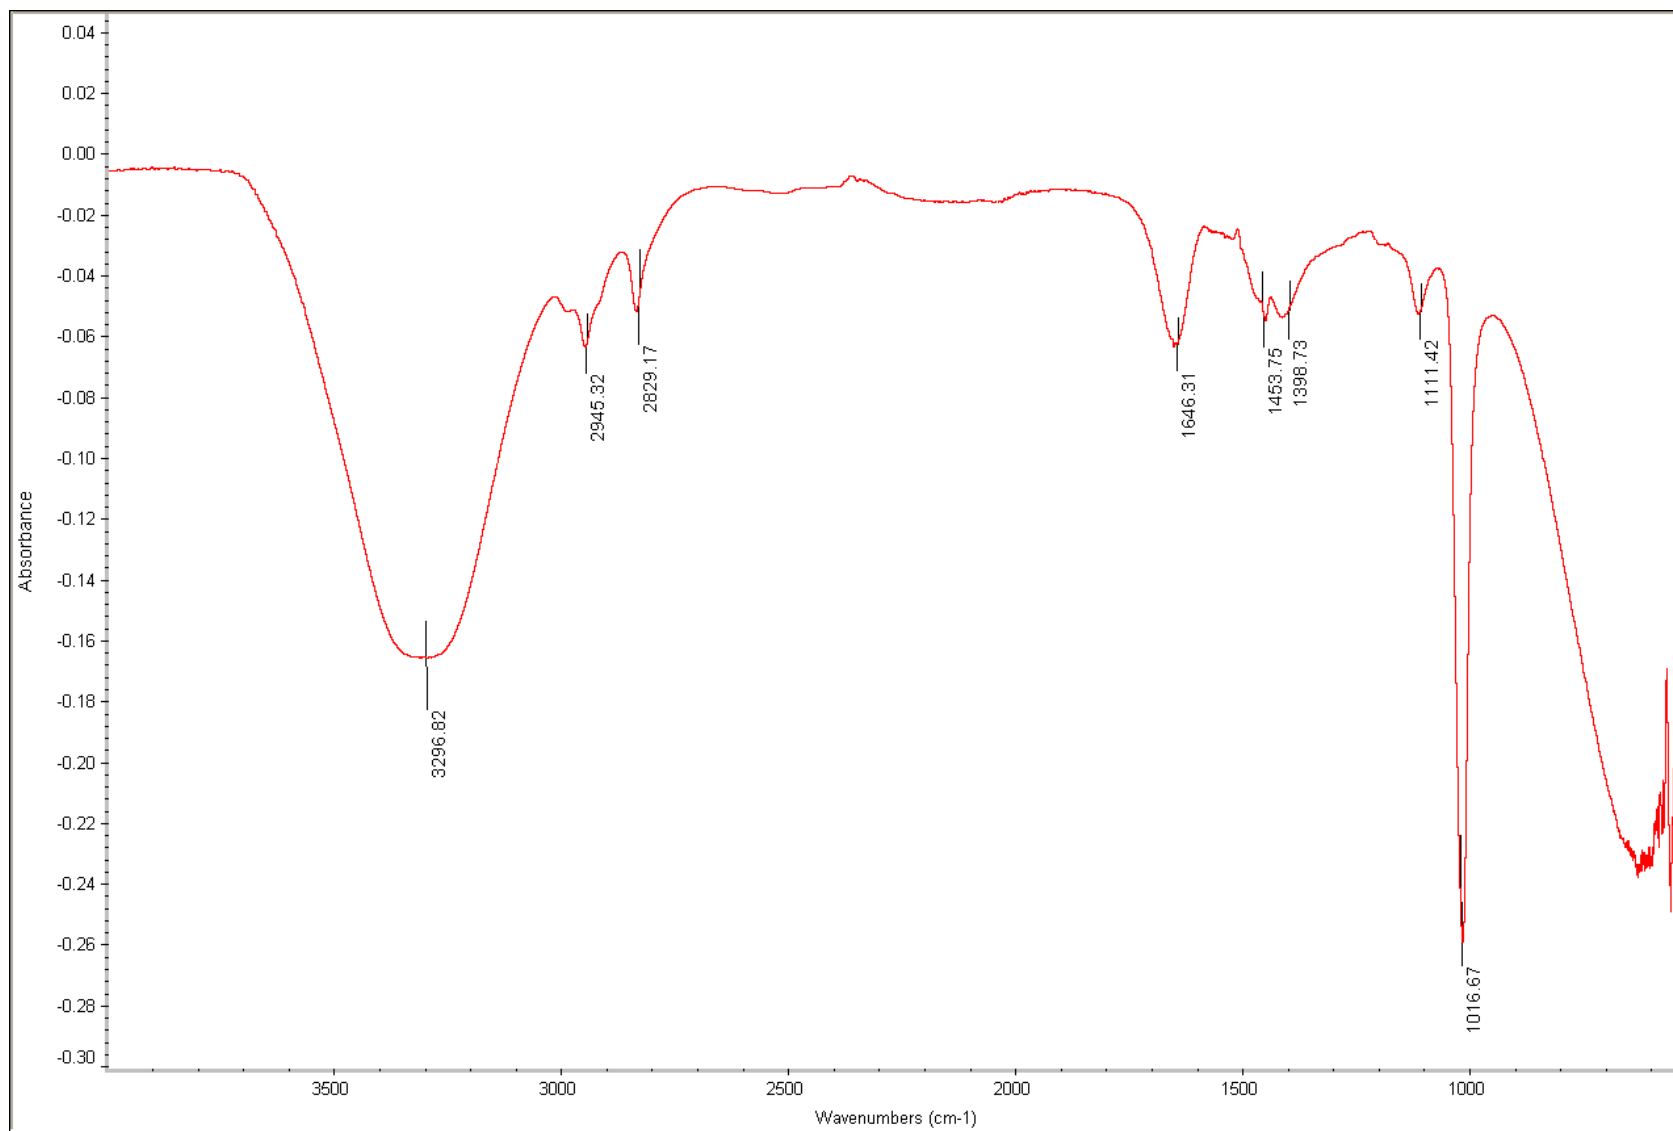

**Fig. S38: HRESIMS of compound 5**

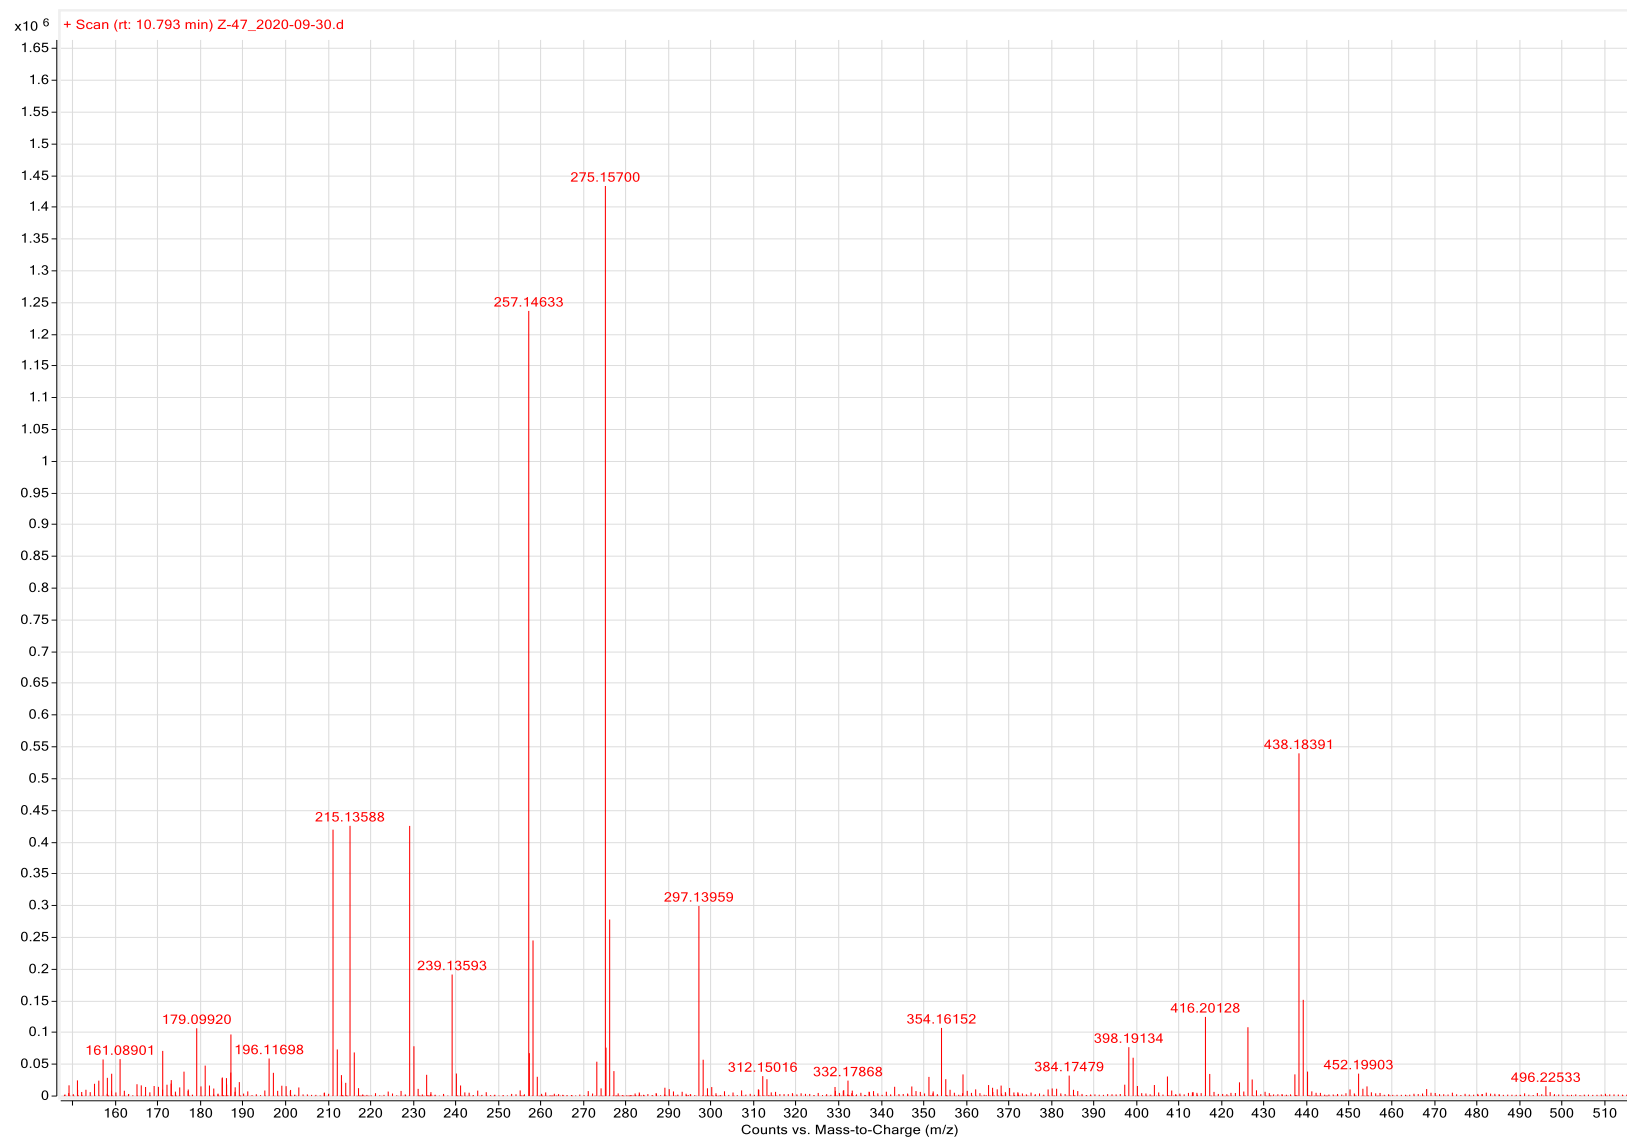

Fig. S39: <sup>1</sup>H NMR spectrum of compound 5 in CD<sub>3</sub>OD (400MHz)

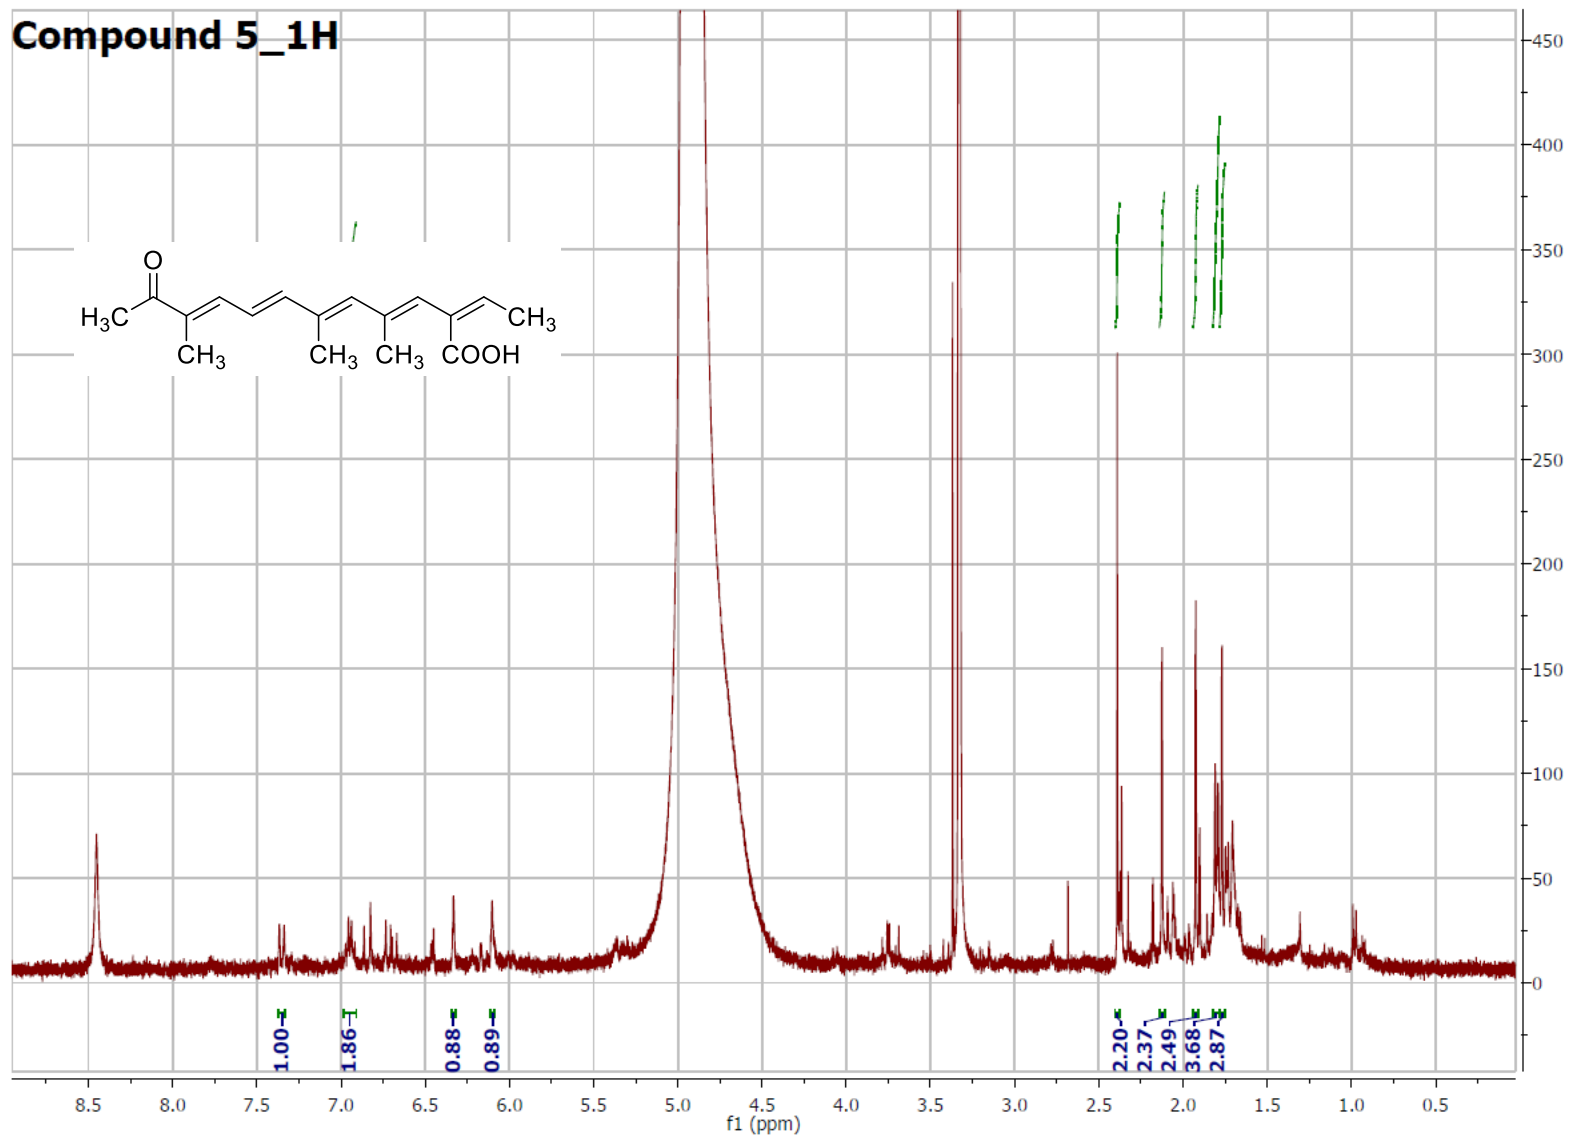

Fig. S40: HSQC spectrum of compound 5 in CD<sub>3</sub>OD (400MHz)

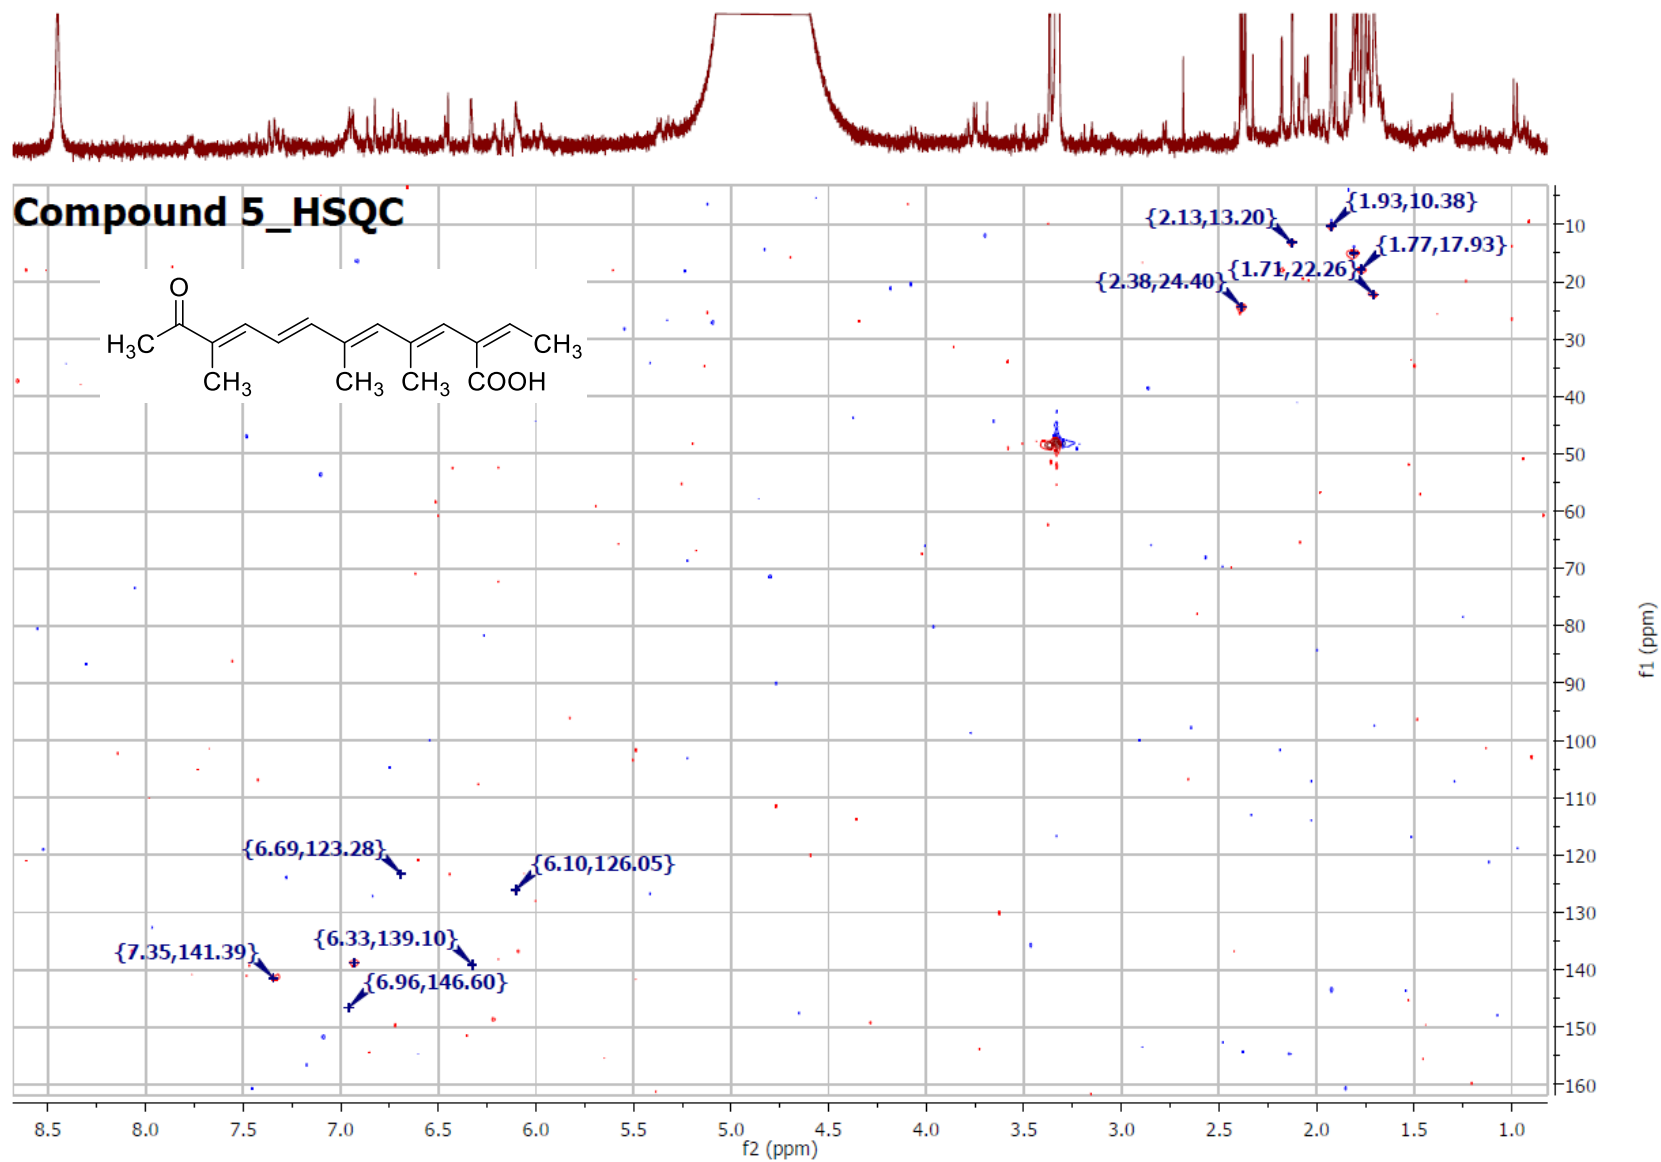

Fig. S41: COSY spectrum of compound 5 in CD<sub>3</sub>OD (400MHz)

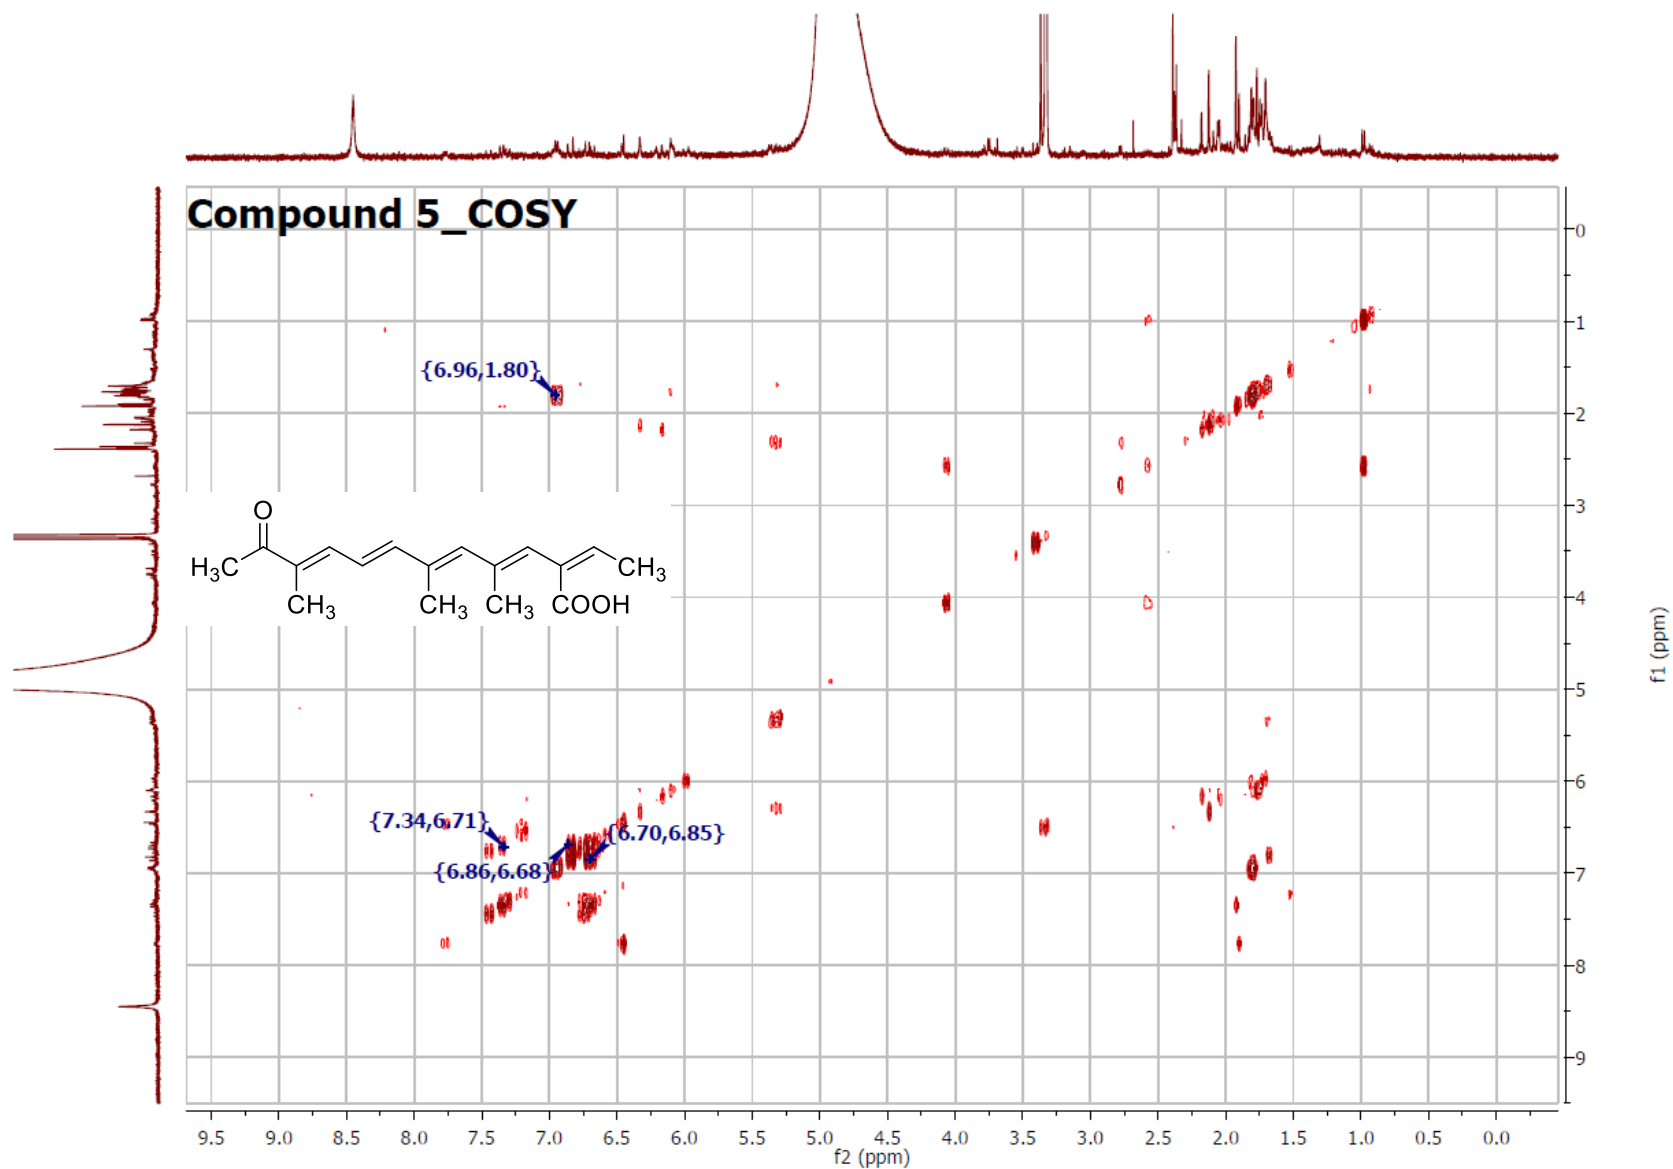

Fig. S42: HMBC spectrum of compound 5 in CD<sub>3</sub>OD (400MHz)

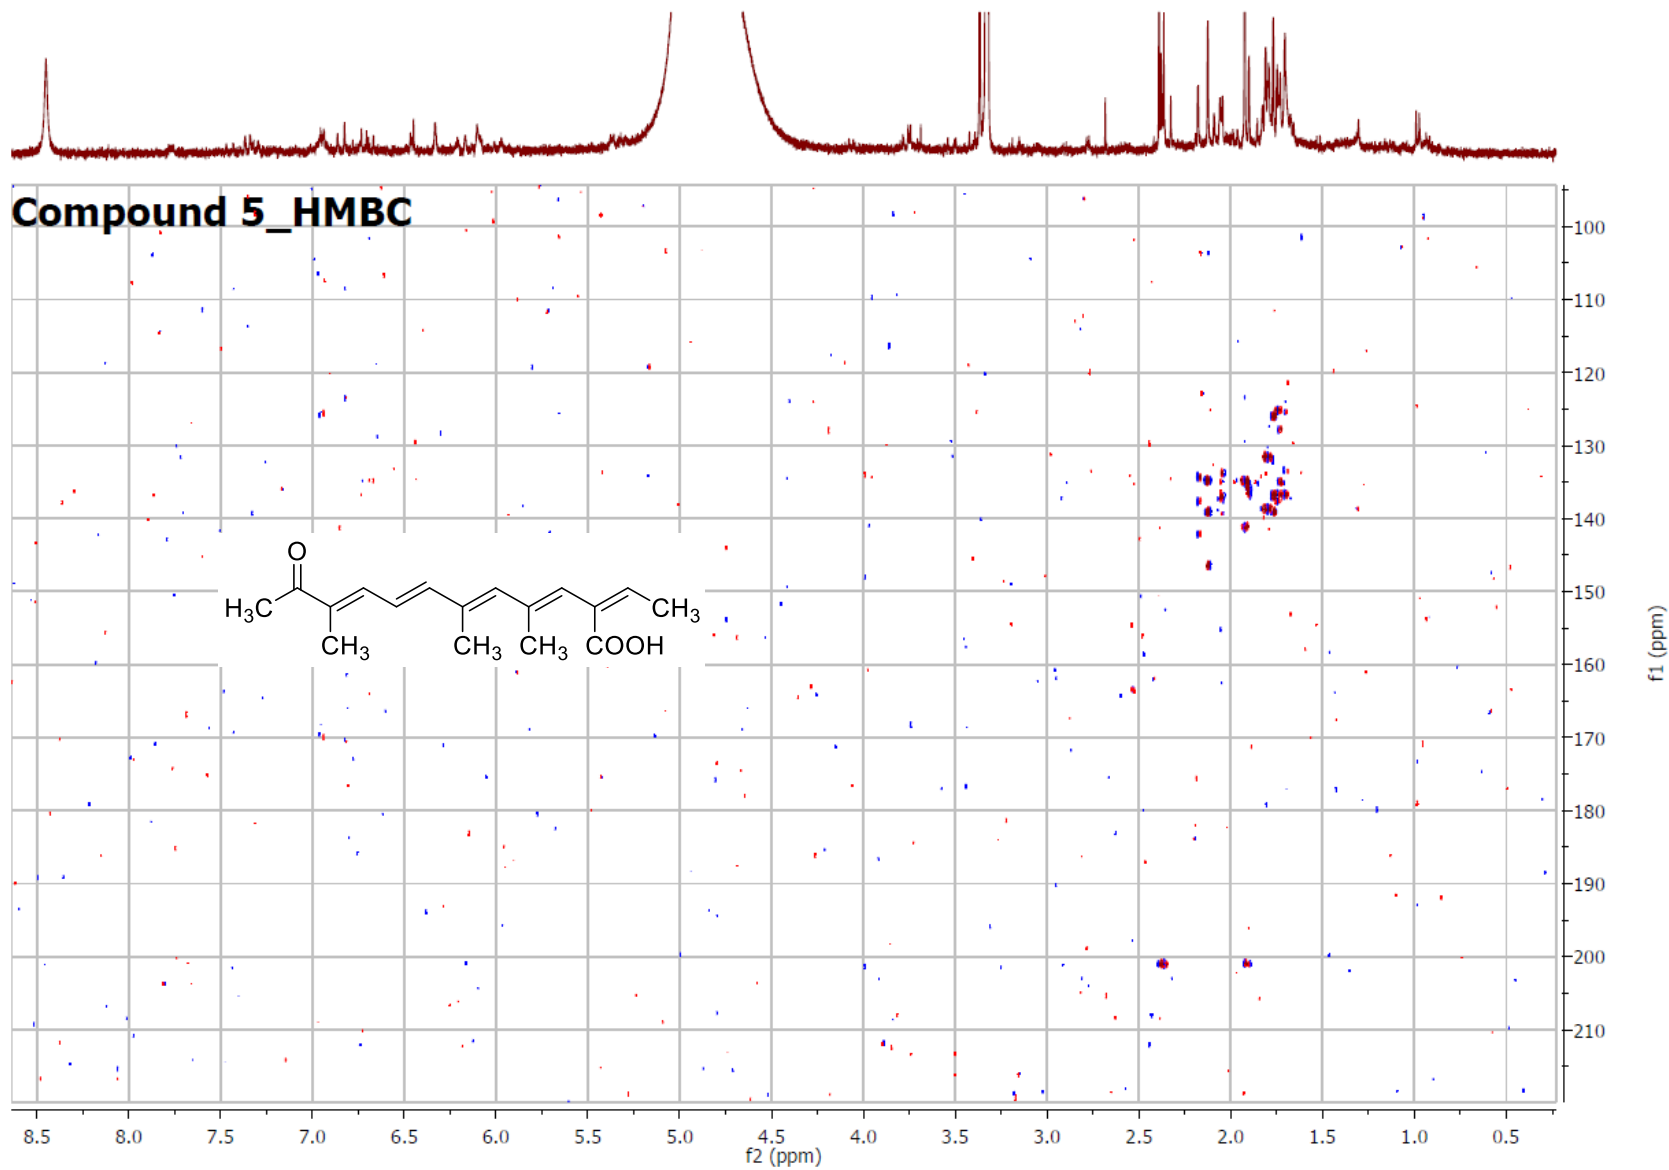

Fig. S43: ROESY spectrum of compound 5 in CD<sub>3</sub>OD (400MHz)

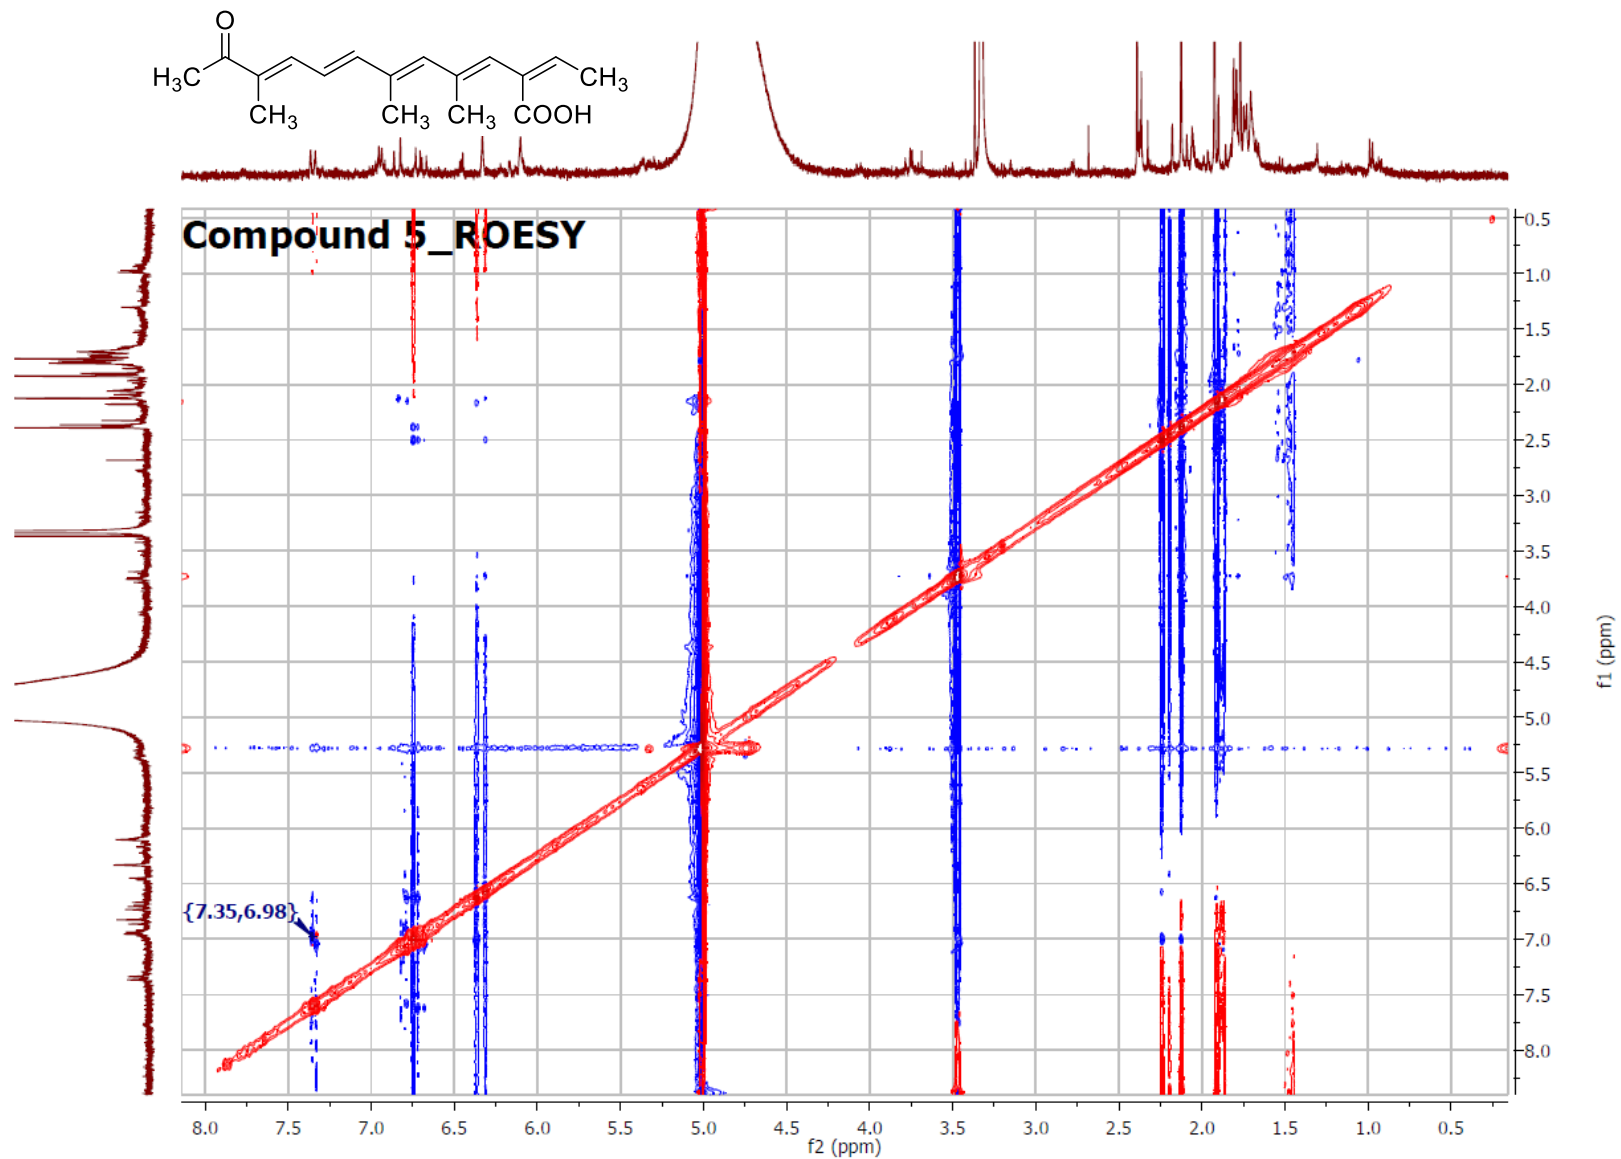

**Fig. S44: IR spectrum of compound 5**

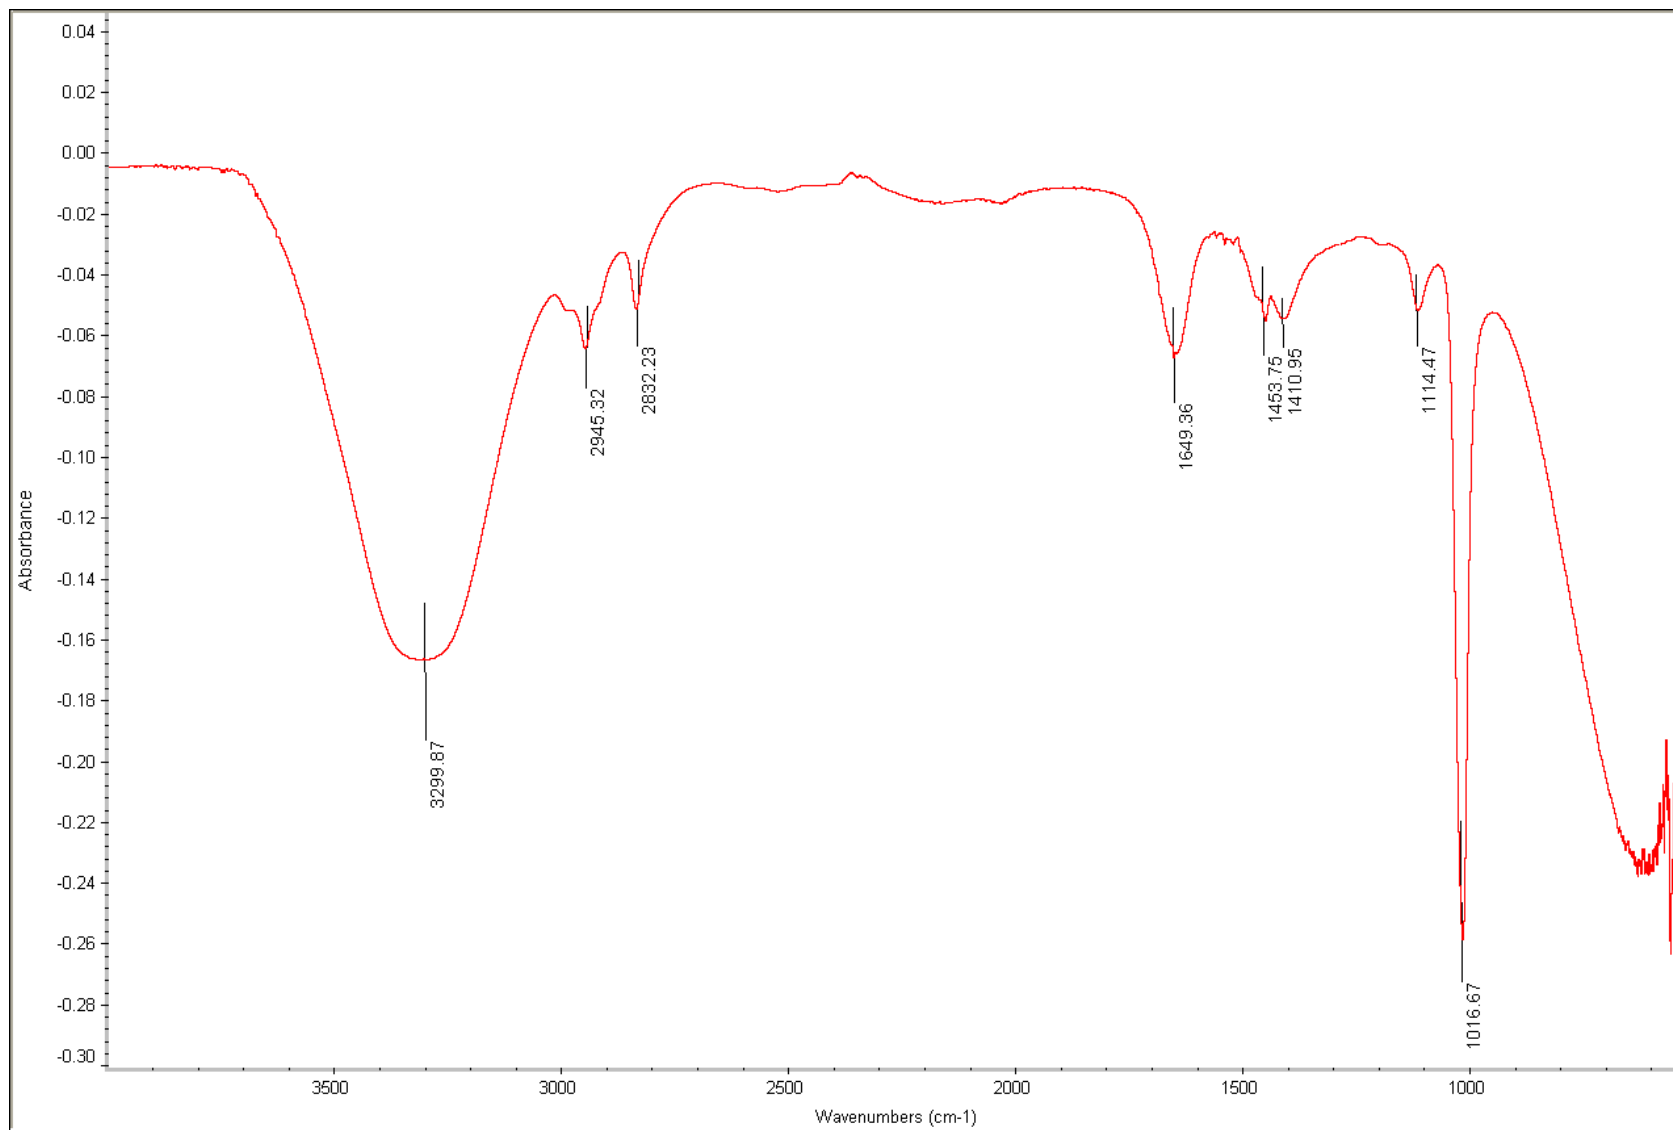



Fig. S45: HRESIMS of compound 6

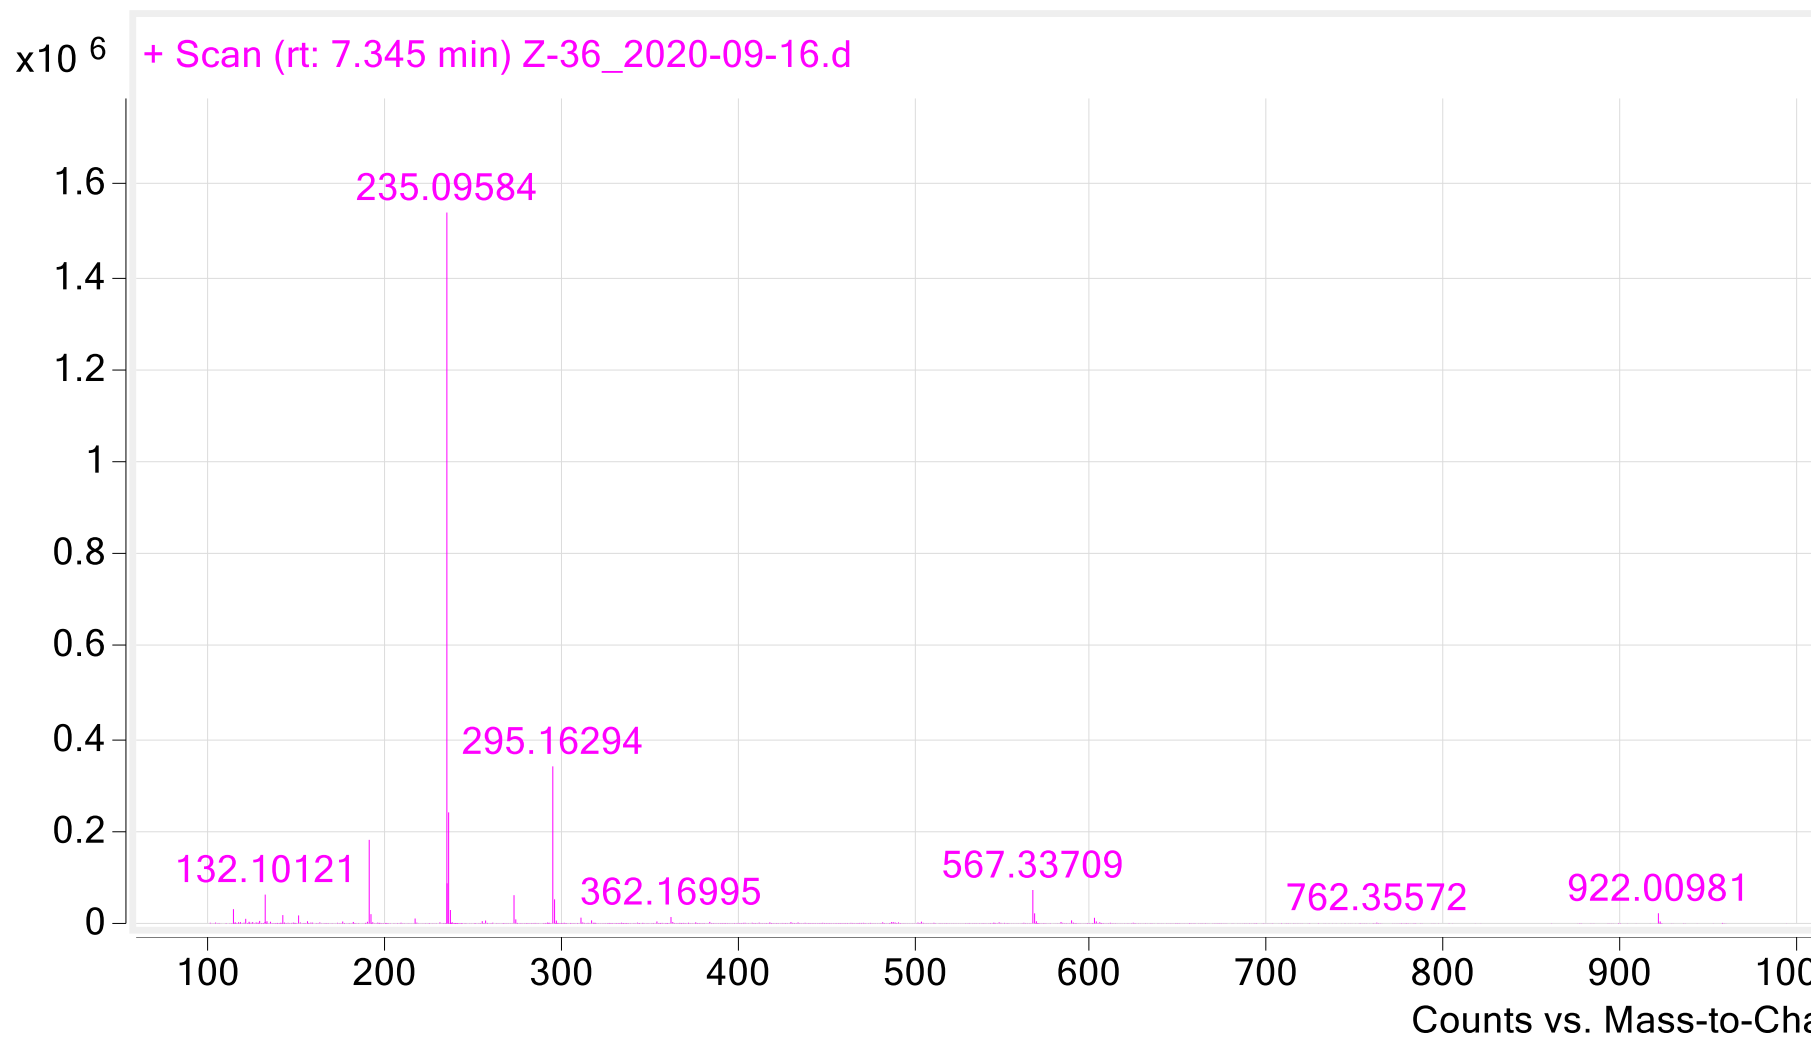

Fig. S46: <sup>1</sup>H spectrum of compound 6 in CD<sub>3</sub>OD (400MHz)

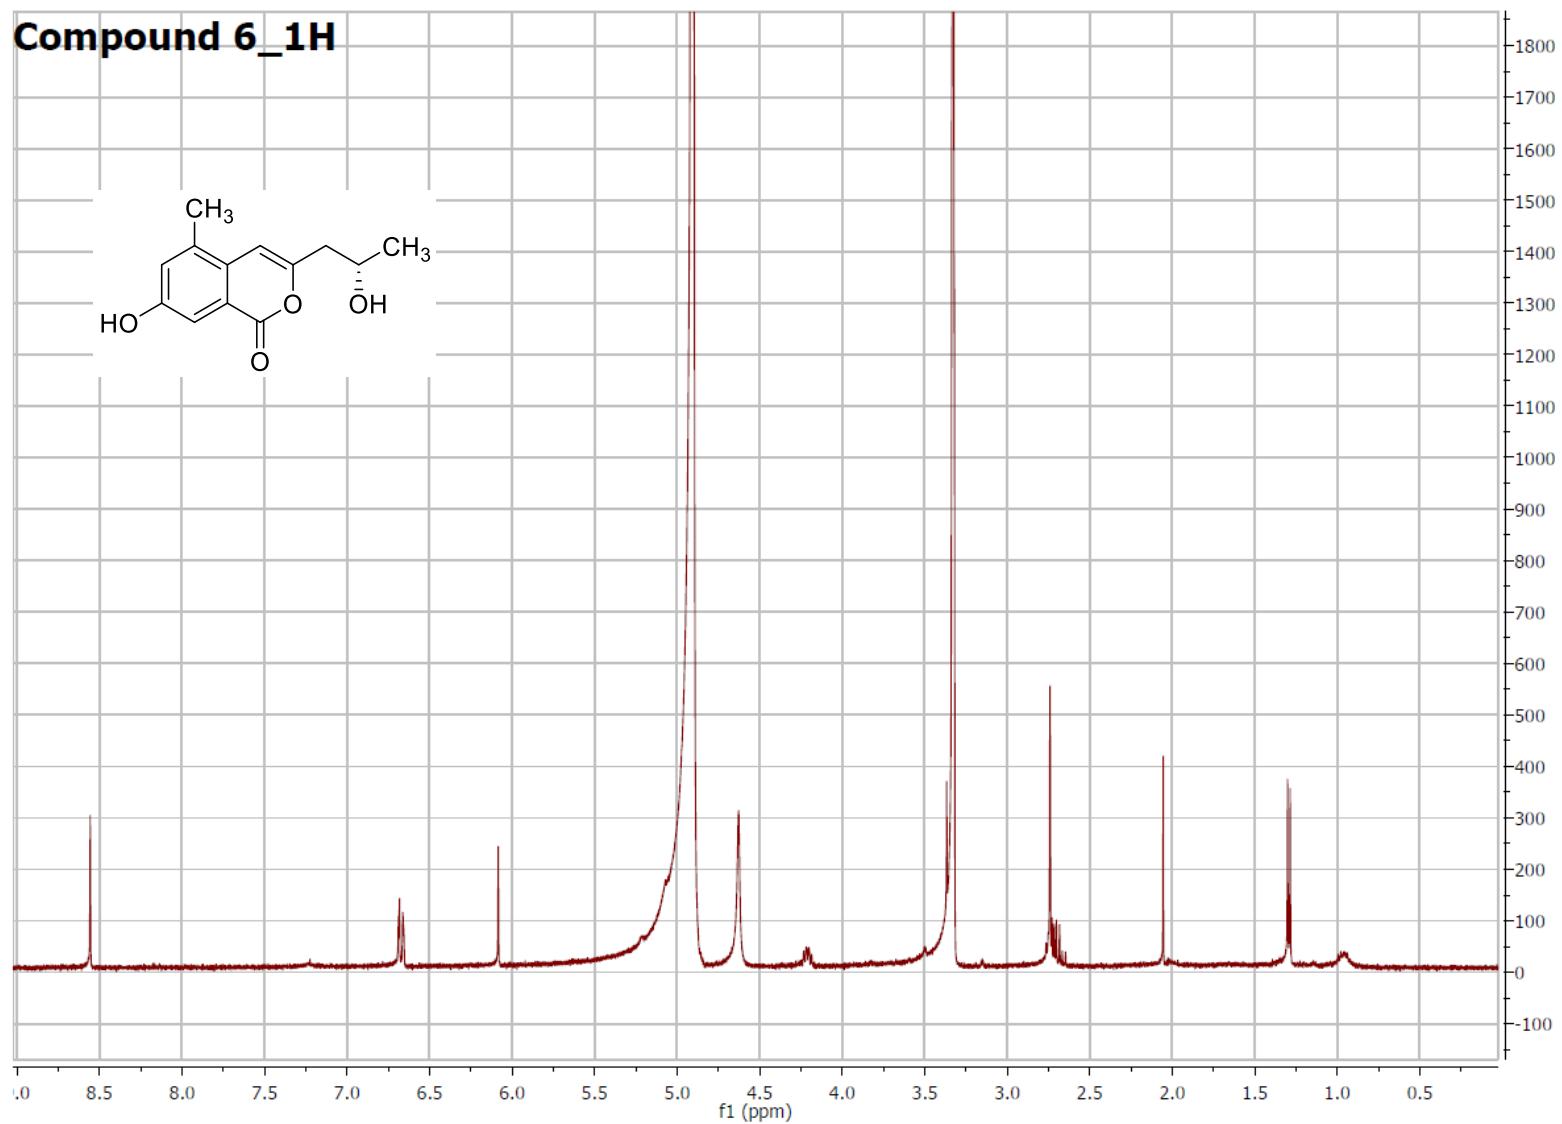

Fig. S47: DEPTQ spectrum of compound 6 in CD<sub>3</sub>OD (400MHz)

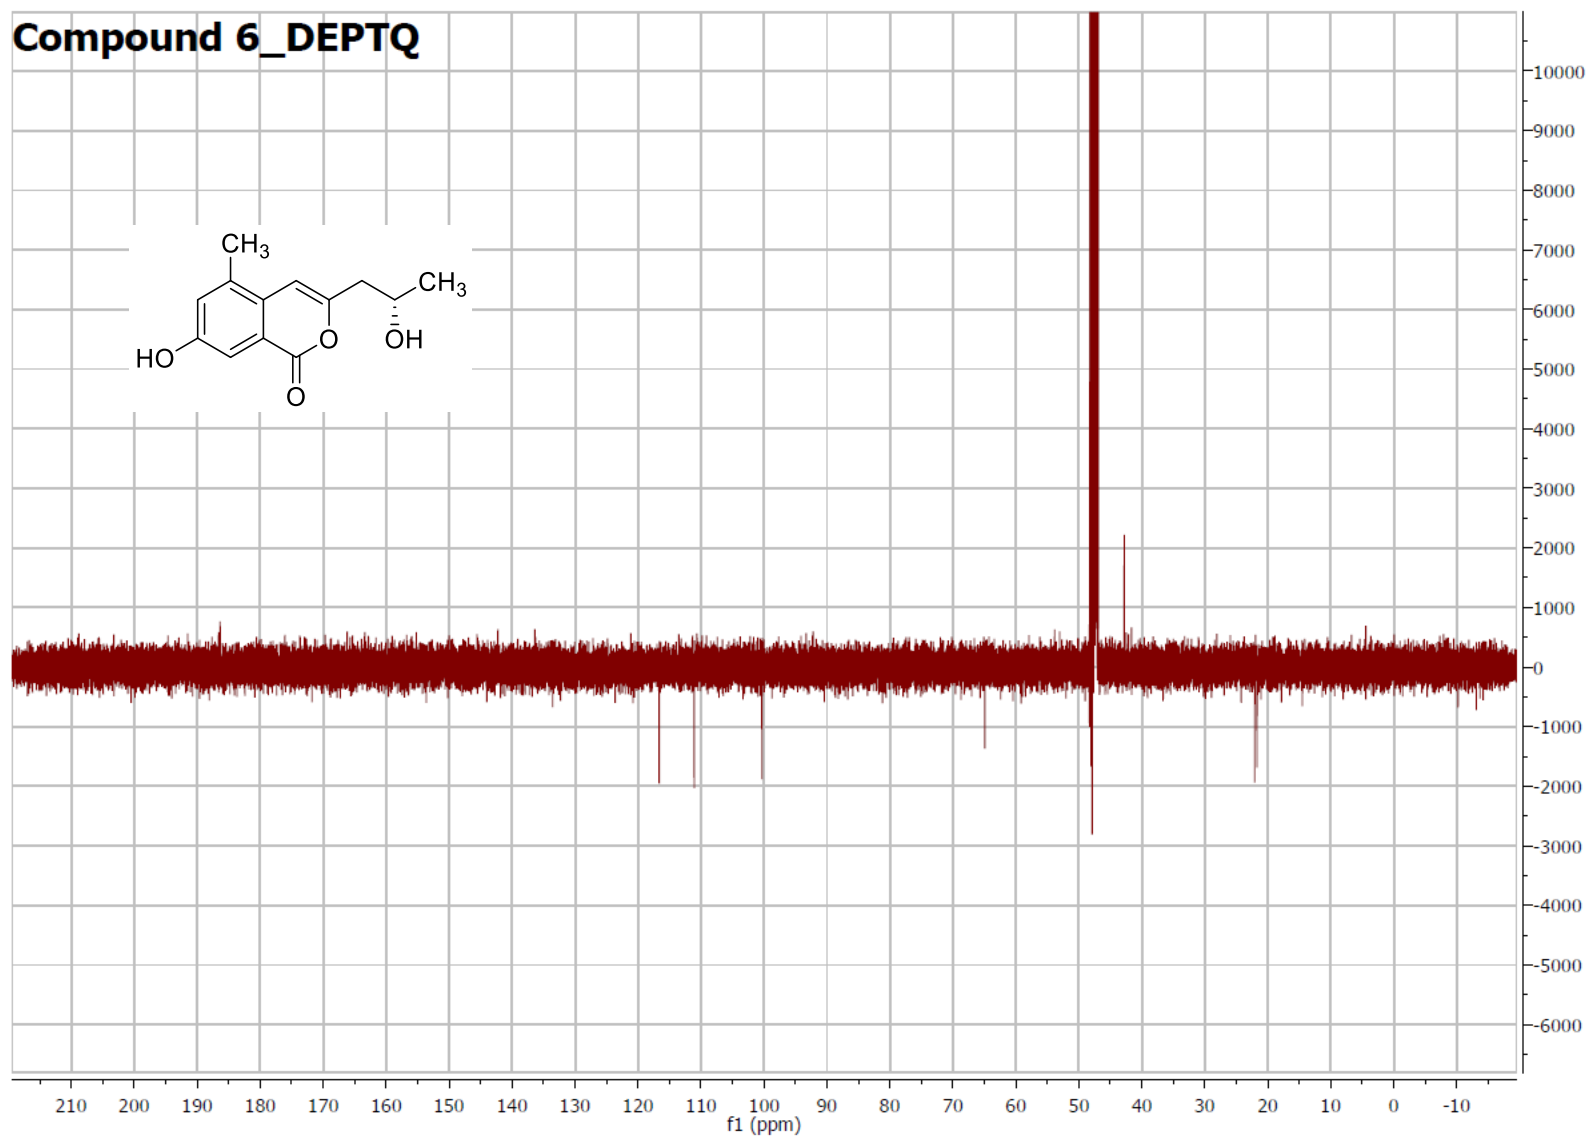

Fig. S48: HSQC spectrum of compound 6 in CD<sub>3</sub>OD (400MHz)

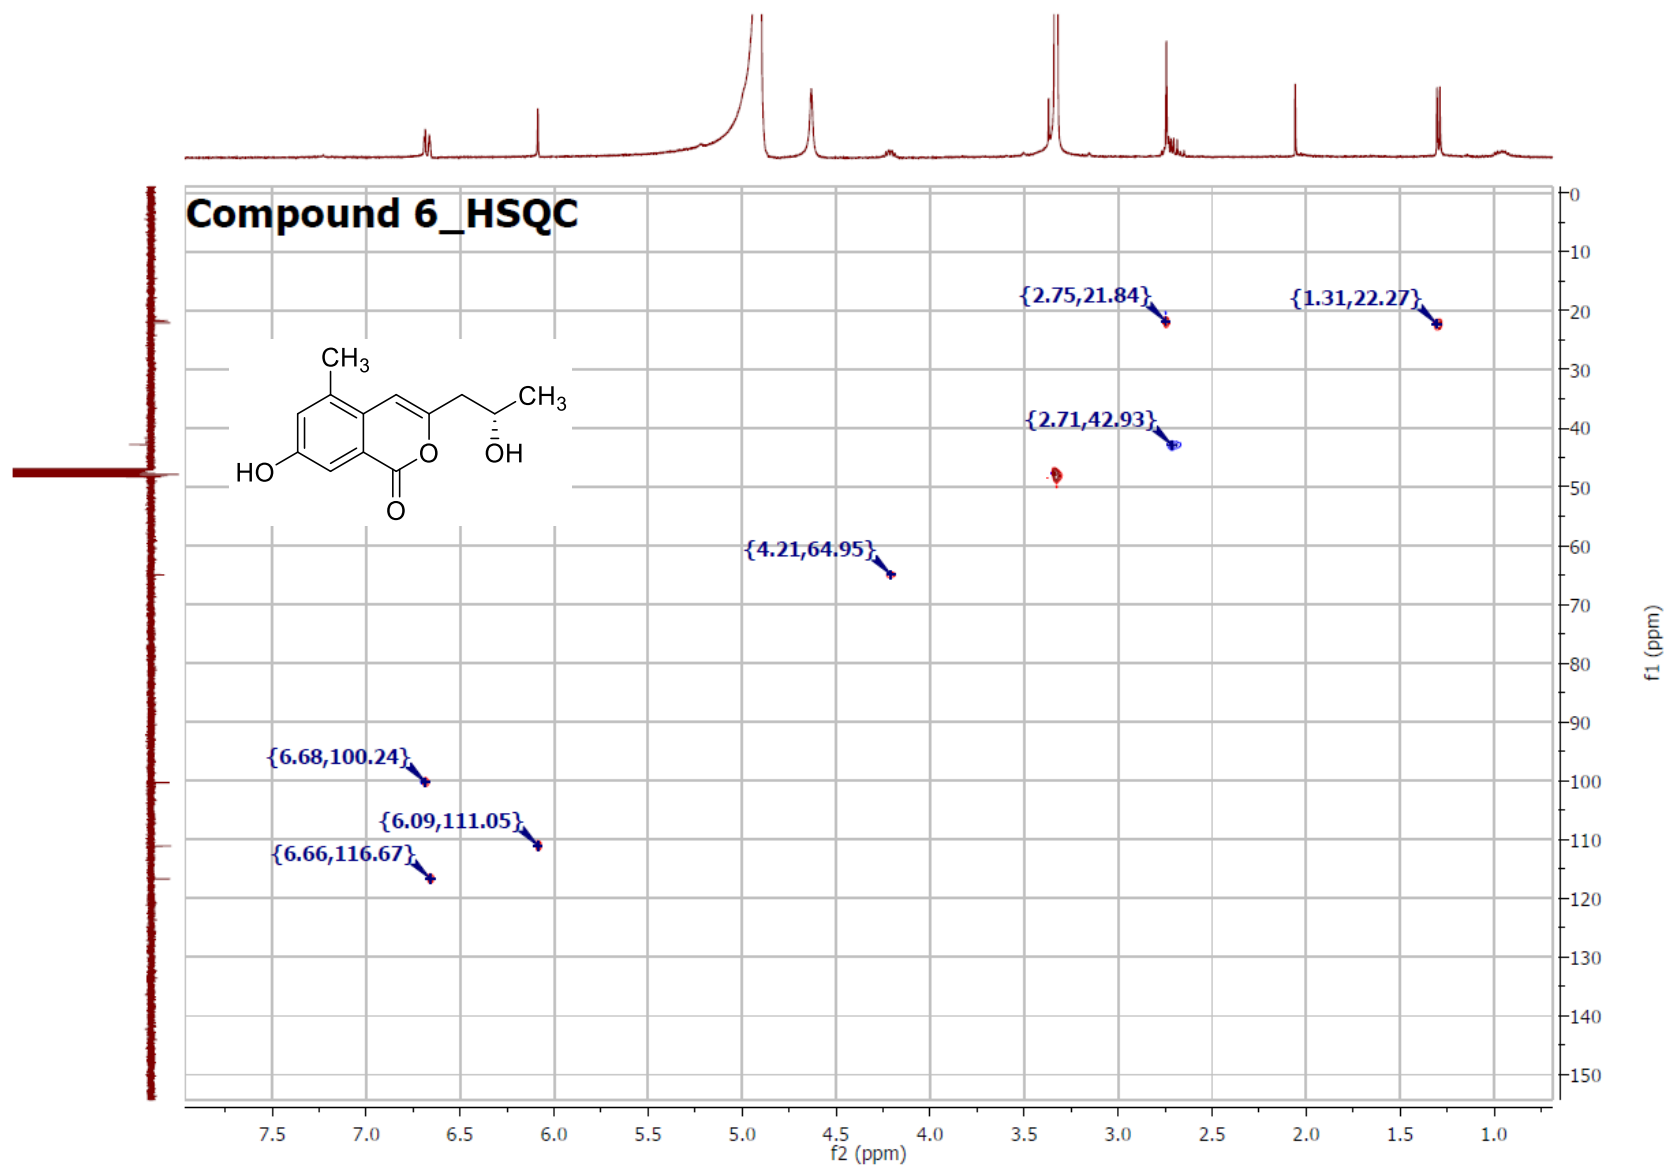

Fig. S49: COSY spectrum of compound 6 in CD<sub>3</sub>OD (400MHz)

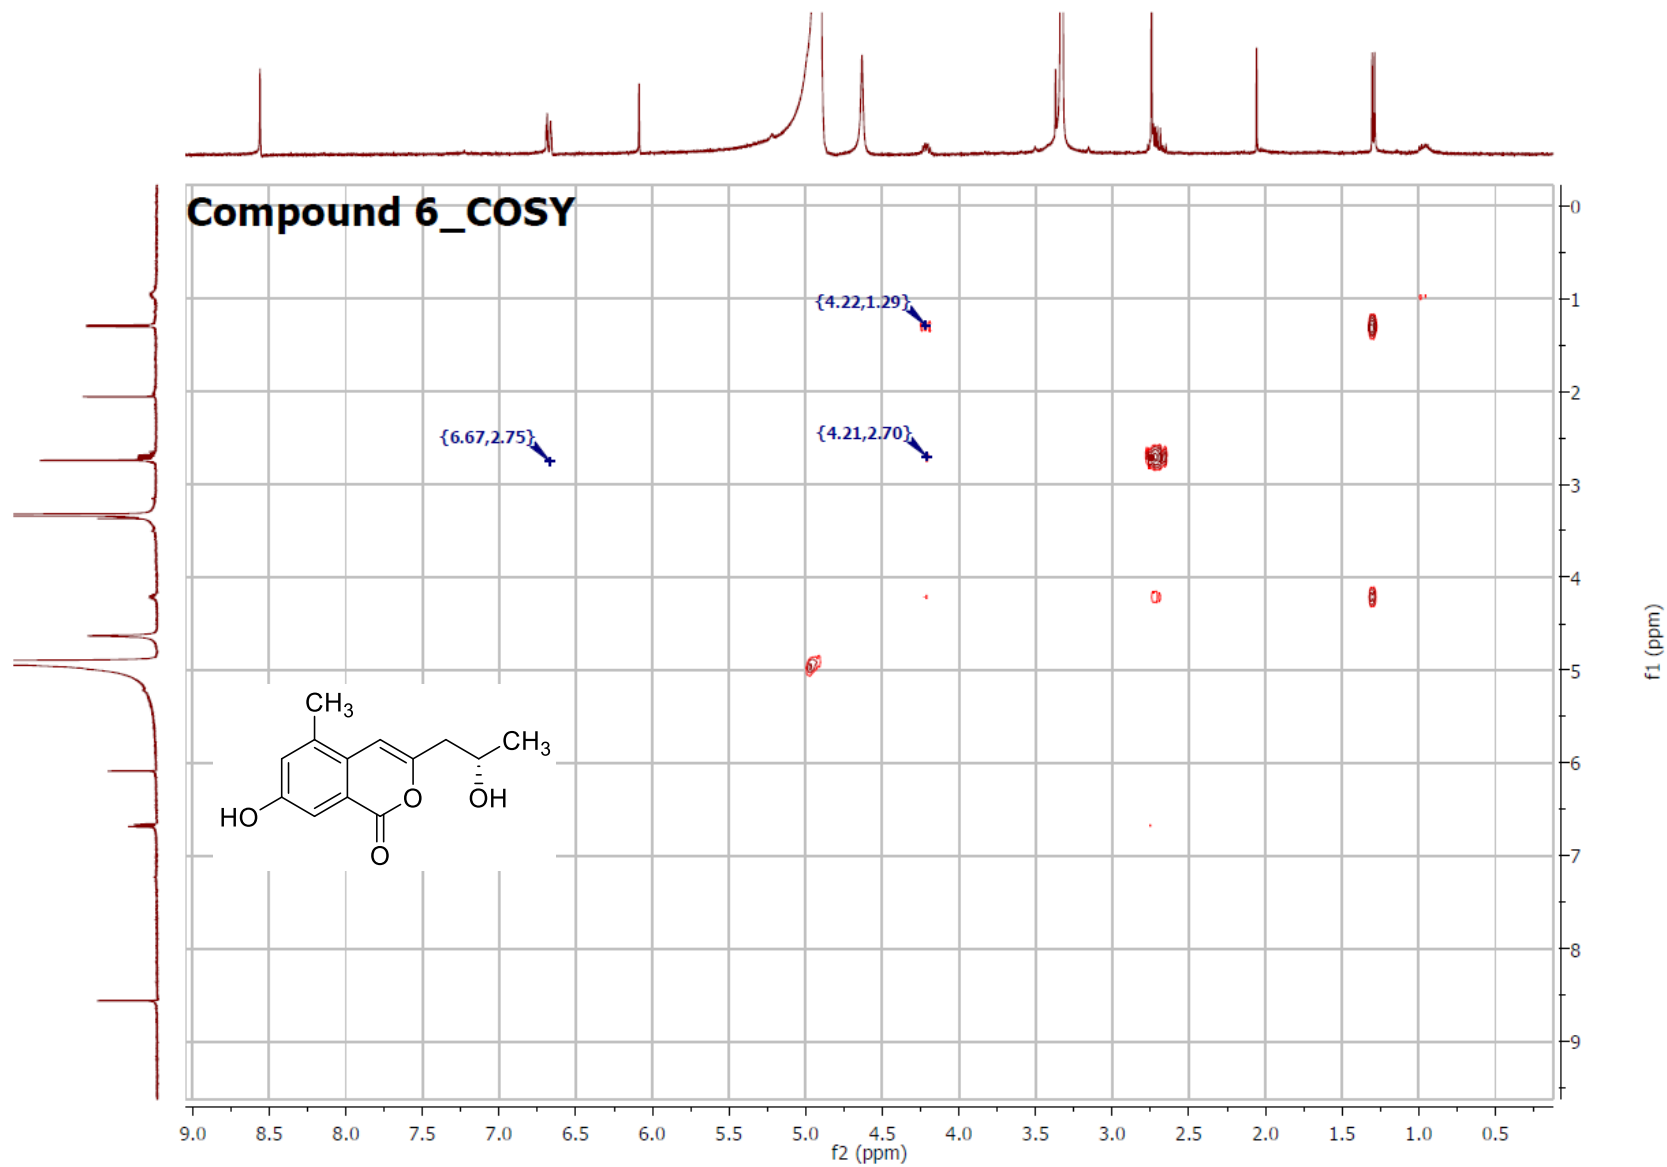

Fig. S50: HMBC spectrum of compound 6 in CD<sub>3</sub>OD (400MHz)

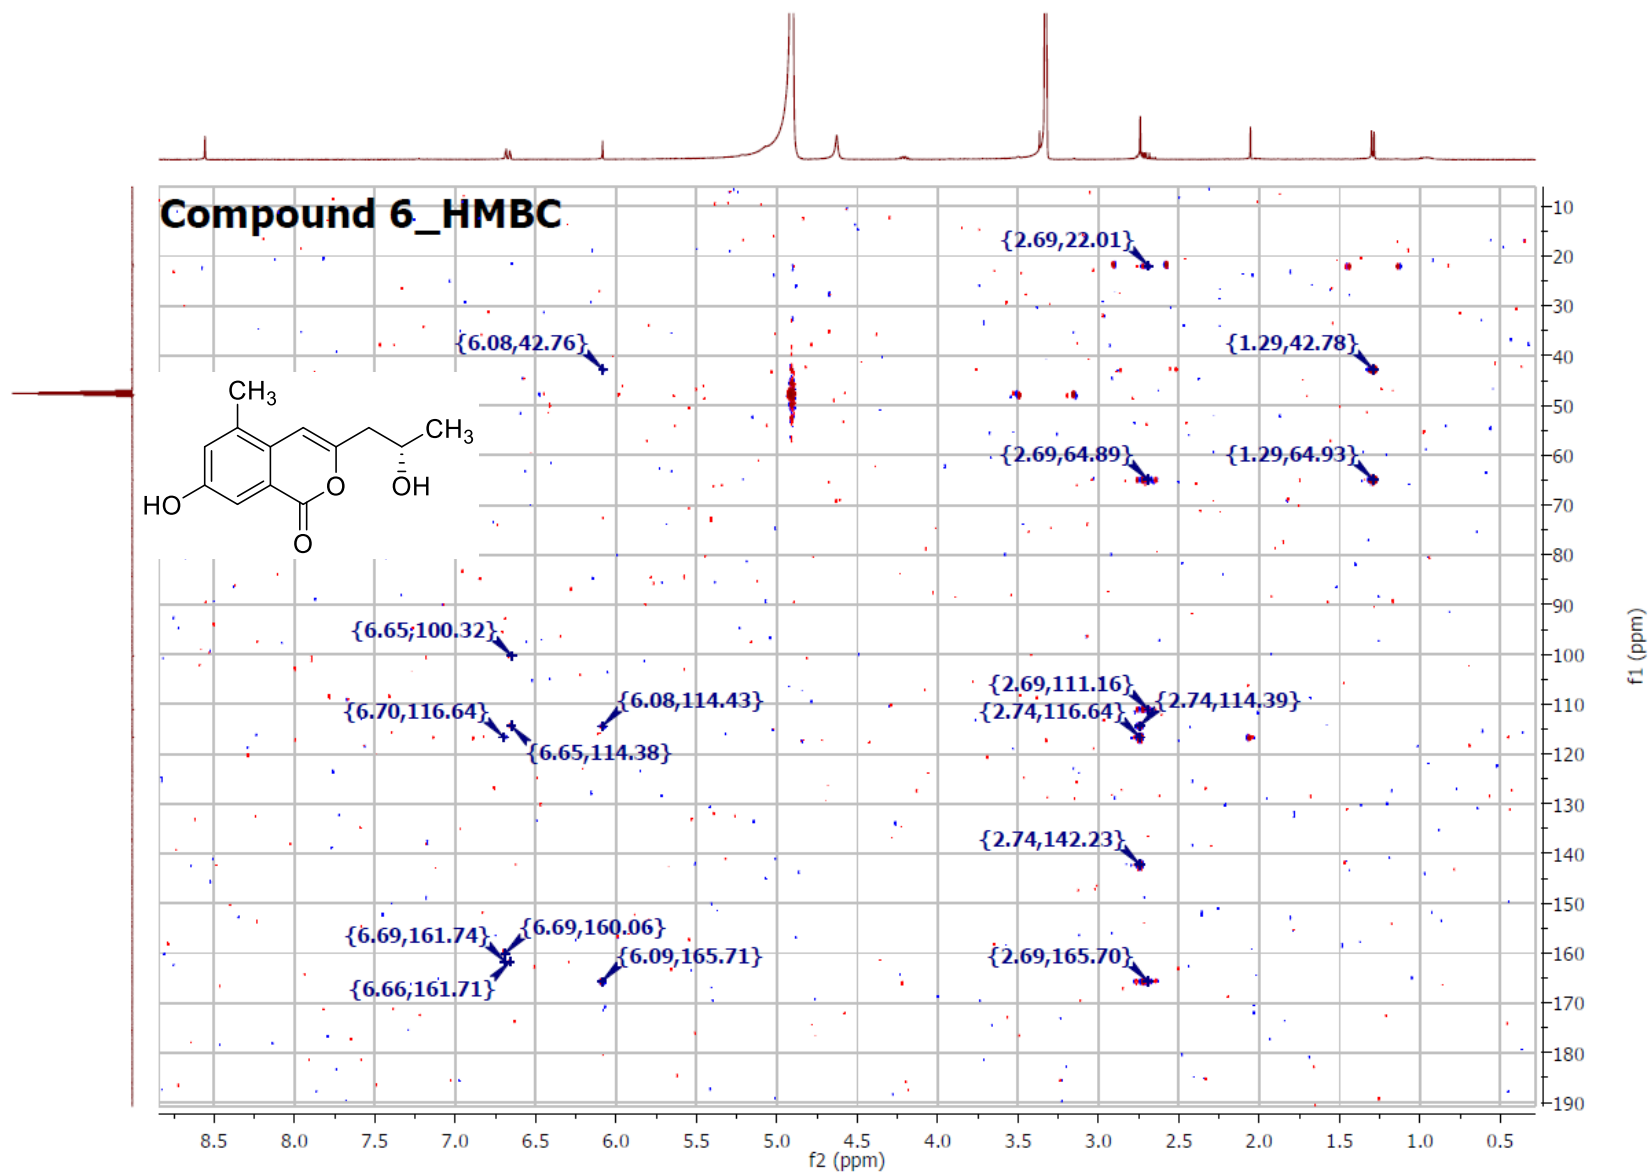

**Fig. S51: IR spectrum of compound 6**

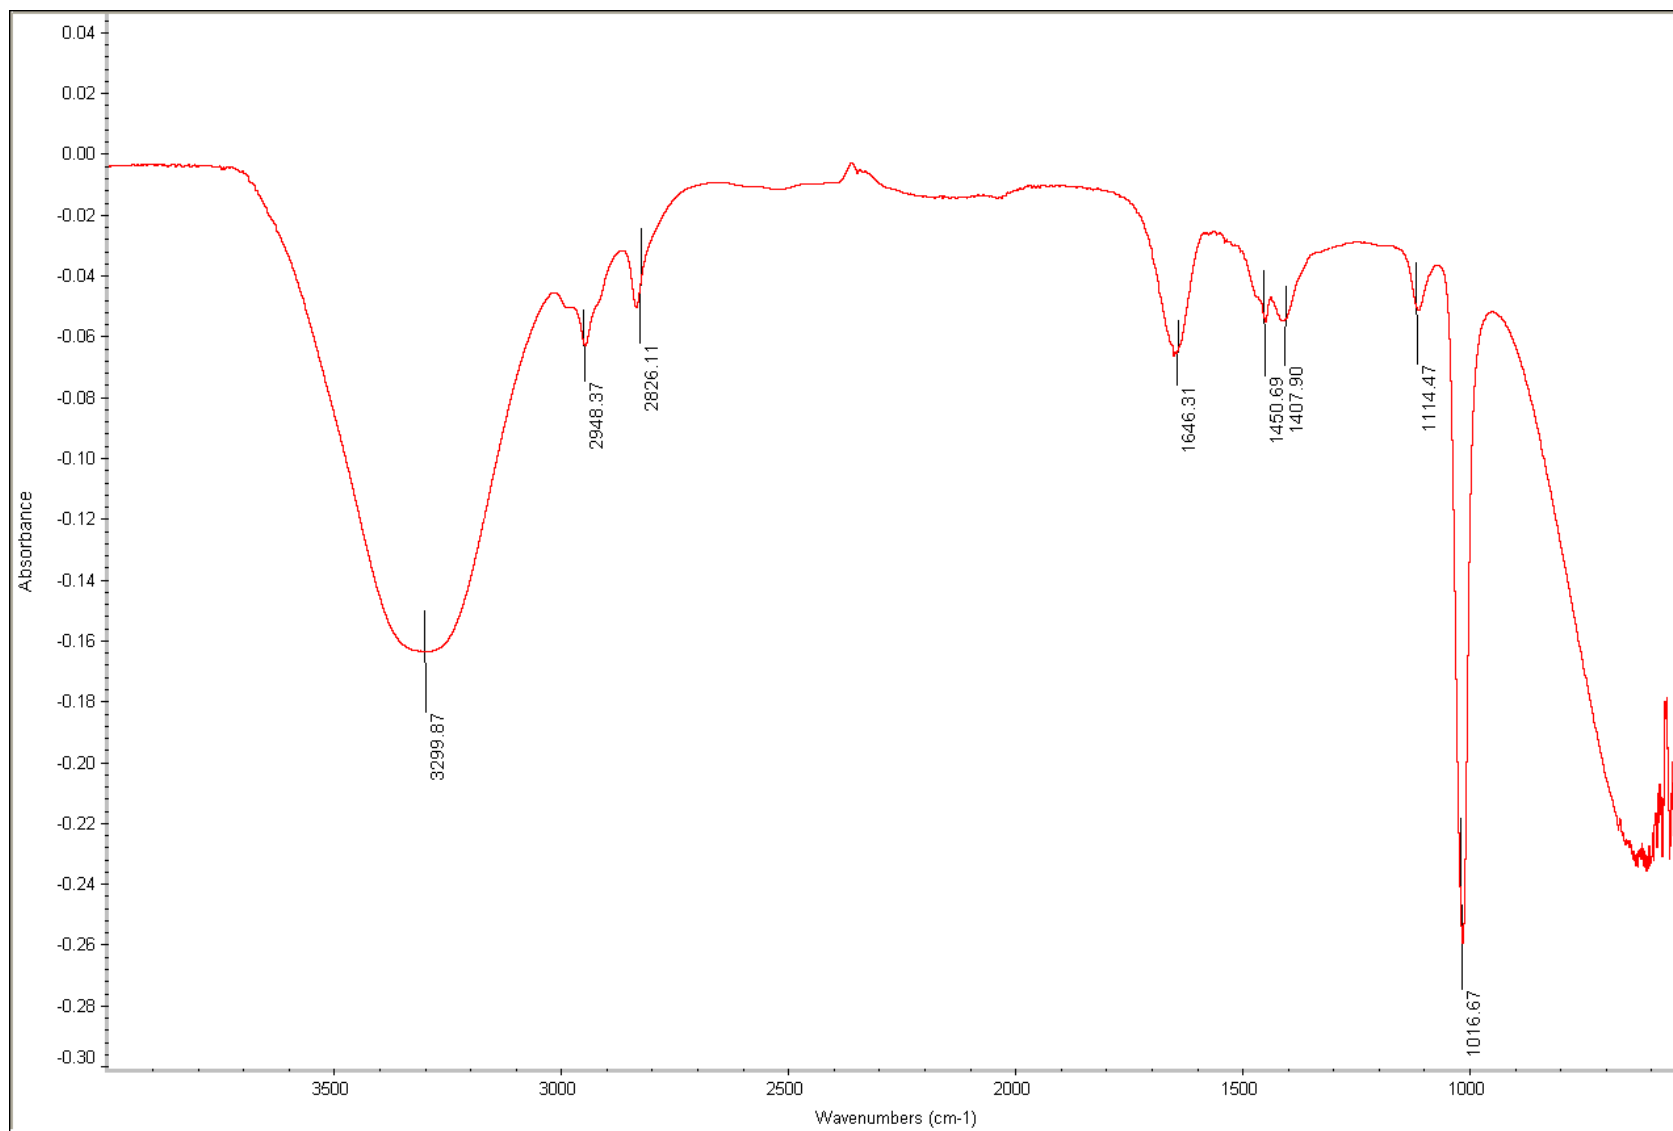

**Table S1.**  $^1\text{H}$  and  $^{13}\text{C}$  NMR Spectroscopic Data, and COSY & HMBC correlations for Compounds **6** in  $\text{CD}_3\text{OD}$

| No.       | $\delta_{\text{C}}$ | $\delta_{\text{H}}$ J (Hz) |
|-----------|---------------------|----------------------------|
| <b>1</b>  |                     |                            |
| <b>3</b>  | 165.7, C            |                            |
| <b>4</b>  | 6.09, s             | 111.0, CH                  |
| <b>4a</b> | 114.3, C            |                            |
| <b>5</b>  | 142.2, C            |                            |
| <b>6</b>  | 6.66, d (2)         | 116.6, CH                  |
| <b>7</b>  | 161.0, C            |                            |
| <b>8</b>  | 6.68, d (2)         | 100.2, CH                  |
| <b>8a</b> | 160.0, C            |                            |
| <b>9</b>  | 2.71, dd (5,10)     | 42.9, $\text{CH}_2$        |
| <b>10</b> | 4.21, m             | 64.9, CH                   |
| <b>11</b> | 1.31, d (6)         | 22.2, $\text{CH}_3$        |
| <b>12</b> | 2.75, s             | 21.8, $\text{CH}_3$        |

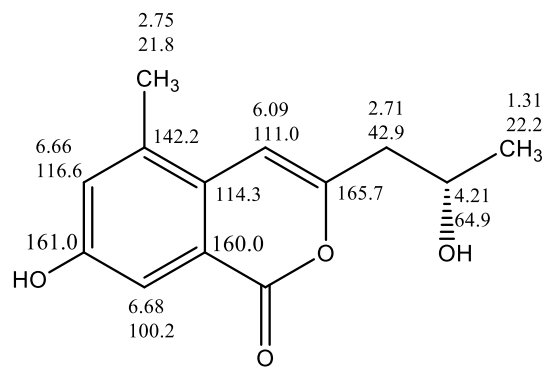

Chemical Formula:  $\text{C}_{13}\text{H}_{14}\text{O}_4$   
Exact Mass: 234.08921

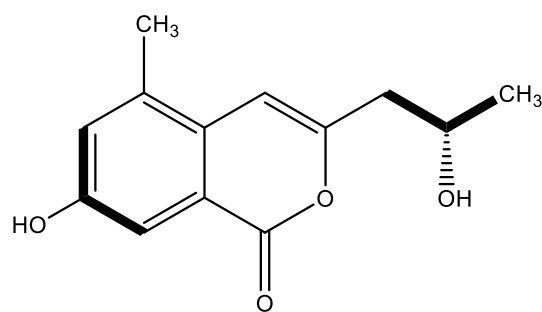

— COSY

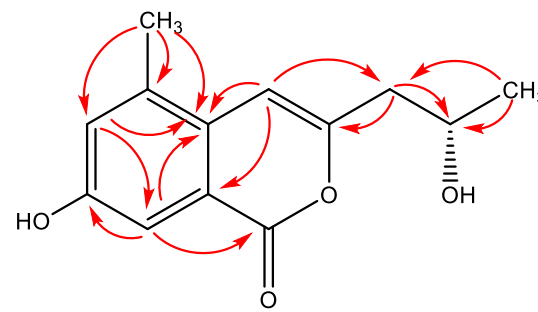

↷ HMBC



**Fig. S52:** Structures of the known compounds **7–11**

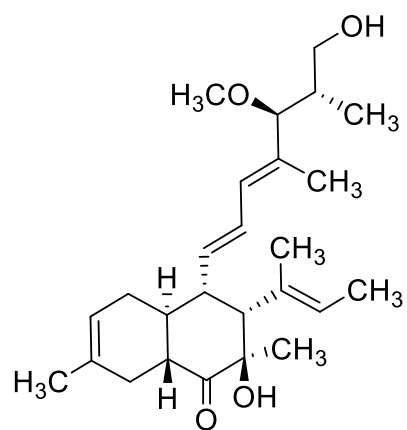

**7: Fusarielin F**

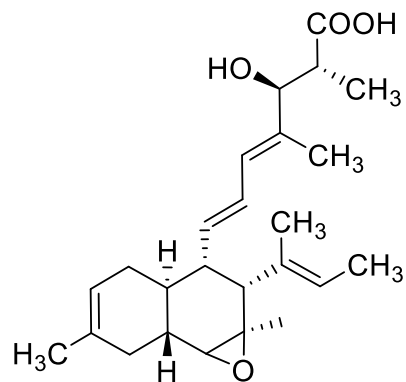

**8: Fusarielin G**

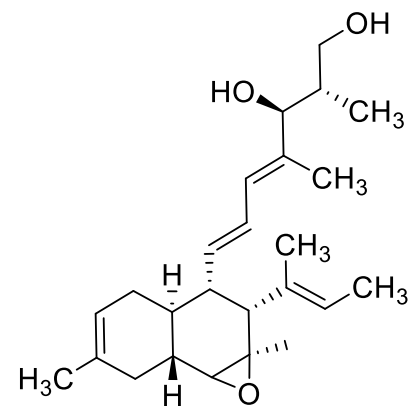

**9: Fusarielin H**

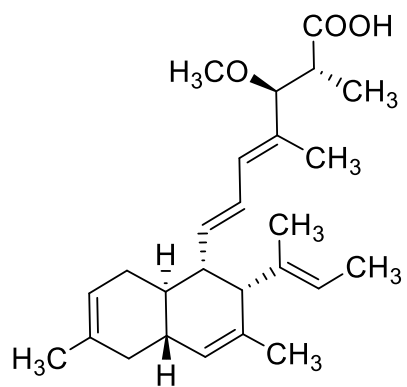

**10: Fusarielin M**

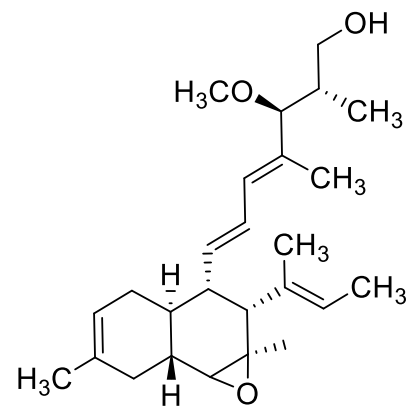

**11: 3-O-methyl-fusarielin**

**Cartesian Coordinates of the most stable conformations found for each isomer.**

1-RRS\_c001

C 1.778910 -0.752246 -0.708964  
C 0.579418 1.437201 -0.346881  
C 3.123494 1.375539 -0.253680  
C 1.825322 1.781023 0.478476  
C 2.900080 0.175404 -1.200413  
N 0.516355 -0.018162 -0.574839  
C -0.636130 -0.700814 -0.840816  
C -1.955483 0.072235 -0.709735  
N -1.812222 1.252216 0.134747  
C -0.685615 1.988422 0.317040  
O -0.640547 -1.878088 -1.188709  
C -3.080450 -0.860471 -0.195880  
C -2.828789 -1.351274 1.237047  
C -4.462882 -0.205744 -0.337976  
O -0.671265 3.042140 0.940227  
C 2.205775 -1.497204 0.560878  
O 3.275157 -2.055680 0.667992  
O 1.276609 -1.496085 1.541906  
H 0.653066 1.953420 -1.320517  
H 1.604812 -1.544503 -1.444659  
H 3.891340 1.128995 0.487559  
H 3.512398 2.220062 -0.834135  
H 1.743239 1.259867 1.439021  
H 1.799672 2.849704 0.700060  
H 3.812450 -0.415419 -1.312411  
H 2.617512 0.526490 -2.199646  
H -2.227582 0.377443 -1.735473  
H -2.651980 1.672058 0.515877  
H -3.040682 -1.727268 -0.863594  
H -2.846958 -0.525423 1.957760  
H -3.604685 -2.066936 1.531023  
H -1.859714 -1.852720 1.318524  
H -4.591709 0.652505 0.335595  
H -5.249343 -0.924197 -0.082684  
H -4.645492 0.140079 -1.362556

H 1.653193 -2.033261 2.264981

1-RRS\_c002

C 1.950775 -0.377281 -0.433822  
C 0.437205 1.643032 -0.415778  
C 2.868463 1.930458 0.160447  
C 1.444351 2.386701 0.468081  
C 2.976811 0.424221 0.395948  
N 0.583778 0.173522 -0.307840  
C -0.418470 -0.647841 -0.764678  
C -1.860018 -0.141827 -0.722555  
N -1.971402 1.205784 -0.186474  
C -0.981284 2.130891 -0.101441  
O -0.205115 -1.789570 -1.158640  
C -2.742785 -1.152982 0.062749  
C -2.328512 -1.268197 1.536007  
C -4.235045 -0.821202 -0.083619  
O -1.190674 3.299535 0.196625  
C 2.059632 -1.830906 0.020291  
O 2.782119 -2.641758 -0.509130  
O 1.417278 -2.065669 1.192711  
H 0.636083 1.936809 -1.462643  
H 2.249452 -0.377162 -1.490192  
H 3.587151 2.460360 0.796022  
H 3.125646 2.172625 -0.880912  
H 1.206236 2.193683 1.521879  
H 1.304319 3.456382 0.297349  
H 2.807898 0.212334 1.458621  
H 3.972698 0.046444 0.140453  
H -2.204785 -0.154759 -1.768865  
H -2.900546 1.580103 -0.032024  
H -2.556273 -2.114499 -0.427942  
H -2.452746 -0.314283 2.061488  
H -2.950207 -2.013268 2.045039  
H -1.283054 -1.577566 1.635394  
H -4.505538 0.111394 0.429464  
H -4.843462 -1.613647 0.365495  
H -4.530774 -0.729998 -1.135909  
H 1.595657 -3.000777 1.405172

1-RRS\_c003

C 1.767852 -0.850502 -0.621360  
C 0.553053 1.355301 -0.359636  
C 3.085216 1.338329 -0.599301  
C 1.882224 1.805535 0.250368  
C 2.780169 0.031300 -1.364933  
N 0.495687 -0.127135 -0.403398  
C -0.678271 -0.775291 -0.736195  
C -1.956780 0.071050 -0.636647  
N -1.778203 1.174247 0.303193  
C -0.646962 1.928272 0.402807  
O -0.715289 -1.947351 -1.083199  
C -3.179467 -0.803089 -0.269697  
C -3.074336 -1.411777 1.136136  
C -4.494479 -0.030713 -0.457999  
O -0.585641 2.972828 1.033425  
C 2.373851 -1.398971 0.688431  
O 3.483551 -1.870936 0.724867  
O 1.588244 -1.341294 1.783167  
H 0.485303 1.747938 -1.389435  
H 1.520201 -1.731080 -1.222166  
H 3.948605 1.191498 0.057355  
H 3.366166 2.116850 -1.317668  
H 1.945966 1.400550 1.267218  
H 1.855370 2.891891 0.357528  
H 3.689380 -0.554366 -1.519165  
H 2.365287 0.253974 -2.355118  
H -2.131217 0.466146 -1.653891  
H -2.604906 1.591299 0.714960  
H -3.157601 -1.623630 -0.994598  
H -3.054691 -0.640867 1.915335  
H -3.937814 -2.056835 1.331120  
H -2.174846 -2.027346 1.235537  
H -4.607904 0.788784 0.264494  
H -5.348943 -0.699541 -0.310340  
H -4.573457 0.396331 -1.464832  
H 0.753376 -0.904008 1.527178

1-RRS\_c004

C 1.557110 -0.978931 -0.641769

C 0.726243 1.394864 -0.439063  
C 3.227532 0.958035 -0.624948  
C 2.101480 1.617478 0.198987  
C 2.736844 -0.309282 -1.362268  
N 0.431550 -0.048532 -0.511612  
C -0.830493 -0.559056 -0.642278  
C -1.985257 0.449695 -0.537696  
N -1.594563 1.601548 0.273235  
C -0.359824 2.166464 0.316877  
O -1.035575 -1.750393 -0.858365  
C -3.296184 -0.154054 0.034118  
C -4.011664 -1.061840 -0.976407  
C -3.089033 -0.847839 1.388617  
O -0.123965 3.221663 0.890052  
C 2.008950 -1.602383 0.683508  
O 3.018646 -2.263022 0.791369  
O 1.166471 -1.373277 1.713782  
H 0.743352 1.814385 -1.460938  
H 1.191617 -1.824630 -1.233908  
H 4.056671 0.703869 0.043845  
H 3.626074 1.667723 -1.359159  
H 2.069714 1.204493 1.213477  
H 2.253600 2.693185 0.307973  
H 3.540529 -1.042338 -1.465230  
H 2.398894 -0.055683 -2.373679  
H -2.197536 0.776190 -1.571160  
H -2.330100 2.148721 0.706058  
H -3.950053 0.718152 0.198583  
H -3.419929 -1.955414 -1.183766  
H -4.985668 -1.368860 -0.578613  
H -4.190273 -0.538888 -1.924431  
H -2.489434 -1.754473 1.269316  
H -4.055989 -1.130112 1.819648  
H -2.580021 -0.191623 2.103510  
H 1.540799 -1.854498 2.476350

1-RRS\_c005

C 1.941355 -0.304317 -0.379322  
C 0.359610 1.664043 -0.430522  
C 2.754184 2.039873 0.234224

C 1.304698 2.447401 0.486944  
C 2.905557 0.538654 0.481388  
N 0.557106 0.202810 -0.311985  
C -0.397818 -0.655484 -0.801914  
C -1.862408 -0.231634 -0.736434  
N -2.037215 1.133512 -0.264587  
C -1.087070 2.098436 -0.173032  
O -0.121982 -1.774416 -1.222088  
C -2.650855 -1.255550 0.132111  
C -2.164537 -1.286993 1.587633  
C -4.163769 -1.007912 0.041906  
O -1.351144 3.265494 0.086526  
C 2.010783 -1.732373 0.165478  
O 1.518347 -2.108790 1.205029  
O 2.845448 -2.490736 -0.578489  
H 0.586524 1.963714 -1.469975  
H 2.280185 -0.316677 -1.423449  
H 3.429936 2.595592 0.894468  
H 3.041955 2.288560 -0.797615  
H 1.034862 2.250582 1.532324  
H 1.133746 3.510602 0.304163  
H 2.696180 0.322272 1.535803  
H 3.925836 0.197786 0.272041  
H -2.242020 -0.316731 -1.766154  
H -2.983260 1.472545 -0.133414  
H -2.434845 -2.225808 -0.329051  
H -2.313694 -0.317873 2.078222  
H -2.727933 -2.036772 2.154389  
H -1.102722 -1.545061 1.655786  
H -4.459343 -0.070346 0.531285  
H -4.708413 -1.811686 0.548912  
H -4.510541 -0.975039 -0.998364  
H 2.890581 -3.357196 -0.131956

1-RRS\_c006

C 1.827505 -0.720296 -0.749901  
C 0.613476 1.467450 -0.325251  
C 3.126555 1.374392 -0.000378  
C 1.774361 1.756157 0.634886  
C 2.968708 0.254864 -1.052266

N 0.537583 0.012416 -0.579523  
C -0.608231 -0.665715 -0.806730  
C -1.943862 0.071162 -0.716651  
N -1.821758 1.343490 -0.021239  
C -0.694802 2.073869 0.182815  
O -0.610222 -1.875967 -1.091953  
C -3.017224 -0.836696 -0.056413  
C -2.677696 -1.183223 1.400330  
C -4.419048 -0.220254 -0.179950  
O -0.707897 3.179143 0.706445  
C 2.127066 -1.610571 0.484555  
O 3.085350 -1.440556 1.202180  
O 1.254920 -2.608019 0.690897  
H 0.815253 1.977050 -1.281267  
H 1.680984 -1.394651 -1.601715  
H 3.812673 1.048634 0.783292  
H 3.573710 2.249691 -0.486067  
H 1.606701 1.181352 1.553132  
H 1.732374 2.813188 0.904933  
H 3.892174 -0.324345 -1.138596  
H 2.775864 0.689612 -2.040894  
H -2.258348 0.242498 -1.760529  
H -2.674735 1.808949 0.266025  
H -2.997526 -1.760015 -0.644311  
H -2.645400 -0.287780 2.031372  
H -3.437500 -1.854925 1.814200  
H -1.710791 -1.690887 1.479672  
H -5.174464 -0.932386 0.168499  
H -4.659870 0.040567 -1.217648  
H -4.534252 0.683195 0.433809  
H 0.554322 -2.584735 -0.009402

1-RRS\_c007

C 1.747395 -0.675085 -0.427520  
C 0.716988 1.607768 -0.433947  
C 3.118890 1.367234 0.262663  
C 1.813746 2.122557 0.505354  
C 2.886478 -0.130666 0.462361  
N 0.523116 0.146064 -0.301202  
C -0.635018 -0.440907 -0.756404

C -1.941736 0.343543 -0.659587  
N -1.736048 1.742261 -0.310348  
C -0.563714 2.419877 -0.228650  
O -0.662530 -1.595346 -1.170438  
C -2.940366 -0.310434 0.348968  
C -3.539532 -1.620425 -0.178595  
C -2.330811 -0.476470 1.747458  
O -0.509977 3.625329 -0.020424  
C 1.550458 -2.139009 -0.042800  
O 2.083081 -3.057053 -0.620094  
O 0.885188 -2.290790 1.130963  
H 1.043805 1.819023 -1.468375  
H 2.071364 -0.689331 -1.476515  
H 3.899626 1.718310 0.947156  
H 3.479505 1.562112 -0.757603  
H 1.918149 3.196125 0.333040  
H 1.486150 1.989031 1.544330  
H 2.626612 -0.321683 1.510367  
H 3.788576 -0.709778 0.236359  
H -2.394366 0.280639 -1.659582  
H -2.559744 2.322298 -0.191838  
H -3.763677 0.418060 0.423416  
H -2.776981 -2.396811 -0.271787  
H -4.319426 -1.973945 0.505568  
H -3.996525 -1.481844 -1.165794  
H -1.520816 -1.213781 1.740868  
H -3.095062 -0.819528 2.453634  
H -1.926681 0.469439 2.123848  
H 0.867246 -3.251628 1.297891

#### 1-RRS\_c008

C 1.876663 -0.443609 -0.765953  
C 0.411239 1.563988 -0.353624  
C 2.807867 1.576711 0.510359  
C 1.325410 1.884650 0.840558  
C 2.949631 0.660978 -0.721860  
N 0.532808 0.140726 -0.701917  
C -0.496005 -0.723832 -0.923545  
C -1.933516 -0.222069 -0.799960  
N -2.022966 1.165690 -0.365891

C -1.016914 2.032722 -0.087764  
O -0.293304 -1.900000 -1.218513  
C -2.745478 -1.179482 0.118152  
C -2.243970 -1.163521 1.568589  
C -4.250359 -0.885830 0.036260  
O -1.218621 3.171872 0.315903  
C 2.083076 -1.435909 0.383477  
O 1.515826 -1.425562 1.452645  
O 3.061241 -2.317209 0.076815  
H 0.737989 2.166453 -1.215403  
H 1.968375 -1.014899 -1.693622  
H 3.280459 1.105956 1.379102  
H 3.361217 2.503299 0.320444  
H 0.993047 1.273086 1.685142  
H 1.177602 2.933150 1.107656  
H 3.936785 0.189406 -0.752284  
H 2.858484 1.248036 -1.643294  
H -2.356941 -0.305428 -1.812699  
H -2.946951 1.548121 -0.199767  
H -2.565891 -2.175088 -0.302152  
H -1.179558 -1.411780 1.633936  
H -2.392978 -0.180985 2.032296  
H -2.796327 -1.897873 2.165647  
H -4.506617 0.087108 0.476969  
H -4.814716 -1.641038 0.593994  
H -4.611881 -0.896862 -0.999397  
H 3.162015 -2.897175 0.855162

#### 1-RRS\_c009

C 1.911933 -0.575615 -0.460736  
C 0.544008 1.593439 -0.395002  
C 3.051504 1.705620 -0.254368  
C 1.737242 2.296297 0.251790  
C 3.100224 0.223671 0.113107  
N 0.608940 0.111069 -0.264593  
C -0.474189 -0.604533 -0.762720  
C -1.852617 0.060537 -0.702011  
N -1.829735 1.284762 0.086130  
C -0.772152 2.135970 0.178688  
O -0.358514 -1.737973 -1.202584

C -2.905583 -0.948737 -0.170382  
C -2.613438 -1.403611 1.266713  
C -4.331404 -0.395084 -0.312930  
O -0.850667 3.250747 0.673826  
C 1.930135 -1.944476 0.240822  
O 2.629086 -2.850153 -0.130594  
O 1.228372 -2.011426 1.400093  
H 0.551751 1.846181 -1.470268  
H 2.067185 -0.771937 -1.527172  
H 3.903738 2.229508 0.192703  
H 3.133179 1.833663 -1.343229  
H 1.672178 2.192927 1.342212  
H 1.647496 3.363120 0.033396  
H 3.099193 0.131899 1.207625  
H 4.013959 -0.260503 -0.244810  
H -2.119923 0.287055 -1.748458  
H -2.714277 1.677741 0.386304  
H -2.807807 -1.817236 -0.830118  
H -2.622642 -0.560704 1.967590  
H -3.374119 -2.118899 1.597303  
H -1.643009 -1.906311 1.337819  
H -4.524715 0.444557 0.368081  
H -5.062282 -1.172289 -0.065878  
H -4.536350 -0.056746 -1.335685  
H 0.721813 -1.183270 1.498066

#### 1-RRS\_c010

C 1.781191 -0.834337 -0.727334  
C 0.599543 1.498572 -0.594139  
C 3.054549 1.180339 0.101183  
C 1.986744 2.140223 -0.423807  
C 3.099980 -0.047960 -0.808005  
N 0.596802 0.028631 -0.798727  
C -0.604037 -0.626068 -0.877170  
C -1.843393 0.260038 -0.639943  
N -1.552323 1.210785 0.433642  
C -0.357468 1.845853 0.567385  
O -0.684947 -1.830755 -1.093884  
C -3.102302 -0.582455 -0.342552  
C -3.026031 -1.330652 0.997711

C -4.377119 0.269879 -0.442923  
O -0.094609 2.632999 1.464997  
C 1.803434 -1.705828 0.537232  
O 2.498892 -2.688982 0.646413  
O 1.026515 -1.235800 1.540826  
H 0.136522 1.945063 -1.487942  
H 1.726277 -1.551495 -1.550318  
H 2.833036 0.887040 1.135095  
H 4.026634 1.685844 0.112559  
H 1.857966 2.993343 0.247727  
H 2.317791 2.525848 -1.395503  
H 3.911467 -0.733387 -0.545646  
H 3.265110 0.268507 -1.846028  
H -2.030109 0.813000 -1.577979  
H -2.242491 1.382517 1.152902  
H -3.124903 -1.334946 -1.138226  
H -3.045755 -0.646572 1.855351  
H -3.886964 -2.000587 1.098652  
H -2.116733 -1.933170 1.059333  
H -4.415306 1.050833 0.327908  
H -5.265405 -0.357025 -0.309096  
H -4.457881 0.763036 -1.418899  
H 1.142042 -1.859077 2.283065

#### 1-RRS\_c011

C 1.565803 -1.024036 -0.556634  
C 0.680061 1.344046 -0.448367  
C 3.163648 0.952693 -0.822873  
C 2.095060 1.652373 0.044813  
C 2.638339 -0.365565 -1.435002  
N 0.417928 -0.113088 -0.349725  
C -0.852165 -0.620834 -0.554158  
C -1.989690 0.411474 -0.493357  
N -1.601366 1.540971 0.352797  
C -0.377137 2.140121 0.323665  
O -1.056564 -1.808625 -0.765416  
C -3.344311 -0.161849 -0.000591  
C -4.016502 -1.056253 -1.052248  
C -3.236953 -0.857531 1.364492  
O -0.136037 3.212914 0.855617

C 2.175438 -1.529491 0.768875  
O 3.219581 -2.133374 0.796583  
O 1.468333 -1.280158 1.889636  
H 0.597199 1.653710 -1.505066  
H 1.164393 -1.913272 -1.052387  
H 4.045984 0.751757 -0.207020  
H 3.490131 1.617482 -1.630801  
H 2.170329 1.326618 1.088929  
H 2.222428 2.736864 0.054661  
H 3.449118 -1.084554 -1.573012  
H 2.195763 -0.182115 -2.421187  
H -2.137193 0.755447 -1.532856  
H -2.341190 2.096197 0.768506  
H -3.986583 0.725067 0.122787  
H -3.438901 -1.967722 -1.217970  
H -5.021402 -1.334922 -0.716101  
H -4.120365 -0.534425 -2.011700  
H -2.657509 -1.782172 1.285385  
H -4.234855 -1.116066 1.734632  
H -2.762063 -0.212127 2.112431  
H 0.676714 -0.767889 1.636226

#### 1-RRS\_c012

C 1.768918 -0.535694 -0.380174  
C 0.564976 1.664452 -0.443434  
C 2.952484 1.618179 0.329310  
C 1.584490 2.268442 0.528405  
C 2.833823 0.107175 0.534475  
N 0.487881 0.193675 -0.310305  
C -0.603490 -0.484992 -0.802277  
C -1.975883 0.166267 -0.675992  
N -1.895834 1.595392 -0.405154  
C -0.786184 2.367121 -0.289023  
O -0.516134 -1.624157 -1.249476  
C -2.846862 -0.541891 0.413571  
C -3.294607 -1.944862 -0.016511  
C -2.169466 -0.553782 1.790939  
O -0.838093 3.576053 -0.100145  
C 1.598249 -1.976872 0.103210  
O 1.056177 -2.309615 1.133389

O 2.288163 -2.832900 -0.681536  
H 0.907218 1.900976 -1.467405  
H 2.125600 -0.559008 -1.418348  
H 3.682048 2.032698 1.034522  
H 3.327183 1.837109 -0.681011  
H 1.236174 2.110198 1.556969  
H 1.608940 3.346536 0.354298  
H 2.552121 -0.098427 1.574099  
H 3.788181 -0.397880 0.346188  
H -2.467886 0.011036 -1.645725  
H -2.767635 2.103671 -0.302803  
H -3.750506 0.084998 0.483442  
H -2.443993 -2.626007 -0.093993  
H -3.999899 -2.349764 0.718079  
H -3.797543 -1.924897 -0.990833  
H -1.271257 -1.180930 1.790954  
H -2.859311 -0.952504 2.543071  
H -1.881439 0.455255 2.105573  
H 2.188071 -3.712836 -0.271731

#### 1-RRS\_c013

C 1.594549 -0.979075 -0.698911  
C 0.794399 1.413712 -0.380970  
C 3.288185 0.946537 -0.448150  
C 2.133334 1.584267 0.346039  
C 2.806165 -0.254662 -1.291146  
N 0.467825 -0.026492 -0.481438  
C -0.794033 -0.515113 -0.524652  
C -1.937971 0.504021 -0.526060  
N -1.552836 1.677035 0.254351  
C -0.310194 2.227412 0.301241  
O -1.017352 -1.734801 -0.603672  
C -3.294740 -0.038025 -0.005592  
C -3.962926 -0.995912 -1.002527  
C -3.204829 -0.638569 1.405118  
O -0.076376 3.307169 0.823768  
C 1.938349 -1.752656 0.598743  
O 3.009645 -1.667878 1.153477  
O 0.963306 -2.551982 1.053185  
H 0.887241 1.827561 -1.399221

H 1.222390 -1.719576 -1.416649  
H 4.063829 0.623002 0.248639  
H 3.738510 1.688348 -1.118375  
H 2.045531 1.115644 1.332811  
H 2.290880 2.651541 0.514141  
H 3.609208 -0.986578 -1.414332  
H 2.526087 0.079119 -2.297948  
H -2.083910 0.787524 -1.583958  
H -2.292466 2.260611 0.628939  
H -3.934982 0.857354 0.052227  
H -3.390190 -1.919928 -1.103767  
H -4.971966 -1.247218 -0.657540  
H -4.056534 -0.537411 -1.994938  
H -2.635738 -1.572355 1.398128  
H -4.209170 -0.857829 1.783355  
H -2.725607 0.050641 2.109249  
H 0.176443 -2.485948 0.455986

1-RRS\_c014

C 1.858632 -0.786329 -0.573509  
C 0.607930 1.507631 -0.314824  
C 3.015423 1.525046 -0.891383  
C 1.965769 2.070500 0.073540  
C 3.173942 0.022843 -0.652155  
N 0.606396 0.024136 -0.424724  
C -0.567142 -0.583627 -0.737018  
C -1.842067 0.266675 -0.609339  
N -1.670613 1.276488 0.428131  
C -0.517317 1.971796 0.619313  
O -0.641710 -1.761752 -1.118595  
C -3.084829 -0.616977 -0.346682  
C -3.033894 -1.329690 1.013417  
C -4.382463 0.188560 -0.517740  
O -0.390011 2.889194 1.414536  
C 1.952846 -1.809145 0.610770  
O 2.763998 -1.708895 1.500780  
O 1.083517 -2.824941 0.566813  
H 0.363890 1.910526 -1.313716  
H 1.716730 -1.366348 -1.492274  
H 3.982667 2.014320 -0.733013

H 2.717361 1.741426 -1.927374  
H 2.206855 1.796817 1.107468  
H 1.890975 3.160657 0.042169  
H 3.688642 -0.119860 0.301584  
H 3.803039 -0.432688 -1.424416  
H -1.986387 0.753461 -1.591572  
H -2.473767 1.578600 0.964739  
H -3.052149 -1.381838 -1.129352  
H -2.130260 -1.937749 1.113375  
H -3.061800 -0.621442 1.849732  
H -3.897532 -1.995278 1.117592  
H -4.498769 0.965250 0.249745  
H -5.250448 -0.473564 -0.431222  
H -4.430052 0.677868 -1.497812  
H 0.453191 -2.687061 -0.184102

1-RRS\_c015

C 1.708535 -0.616276 -0.778372  
C 0.570914 1.590637 -0.370912  
C 2.938574 1.240636 0.495651  
C 1.524064 1.787034 0.819182  
C 2.934828 0.316309 -0.738011  
N 0.466287 0.160563 -0.689977  
C -0.684075 -0.546821 -0.875767  
C -2.029399 0.160206 -0.722199  
N -1.891928 1.577234 -0.400663  
C -0.765495 2.283511 -0.127804  
O -0.651260 -1.742999 -1.161586  
C -2.954017 -0.536509 0.325875  
C -3.505376 -1.880161 -0.169717  
C -2.287345 -0.658777 1.702833  
O -0.789684 3.450863 0.243263  
C 1.783342 -1.635001 0.363601  
O 1.274464 -1.524393 1.456230  
O 2.578010 -2.673350 0.020997  
H 0.988774 2.115280 -1.244015  
H 1.703763 -1.187010 -1.711002  
H 3.323386 0.697225 1.365041  
H 3.636842 2.064577 0.310211  
H 1.101330 1.250390 1.674284

H 1.544820 2.850685 1.066146  
H 3.839764 -0.298470 -0.773281  
H 2.930565 0.911735 -1.658553  
H -2.517896 0.068977 -1.703195  
H -2.747080 2.095724 -0.229028  
H -3.811625 0.148296 0.426040  
H -2.708865 -2.619515 -0.272444  
H -4.251154 -2.259083 0.538659  
H -3.993730 -1.775080 -1.146399  
H -1.425229 -1.333005 1.671389  
H -3.000996 -1.056473 2.433018  
H -1.942946 0.313834 2.071780  
H 2.610204 -3.262353 0.798434

1-RRS\_c016

C 1.706455 -1.009786 -0.467887  
C 0.591162 1.258144 -0.579395  
C 3.075081 1.057489 -1.113914  
C 2.004847 1.732150 -0.232694  
C 2.710187 -0.406624 -1.462506  
N 0.486088 -0.204610 -0.421337  
C -0.716025 -0.848511 -0.324414  
C -1.946346 0.083674 -0.346938  
N -1.621418 1.285403 0.422761  
C -0.460603 1.980009 0.274245  
O -0.807560 -2.068559 -0.238755  
C -3.222369 -0.630358 0.166282  
C -4.339214 0.352712 0.558903  
C -3.743423 -1.606717 -0.901296  
O -0.267995 3.087648 0.756096  
C 2.357856 -1.249860 0.898581  
O 3.461600 -1.731743 1.029935  
O 1.575511 -0.905448 1.943607  
H 0.377660 1.526232 -1.630362  
H 1.400399 -2.005882 -0.805527  
H 4.035702 1.091772 -0.589250  
H 3.208537 1.624628 -2.042550  
H 2.182070 1.518689 0.826970  
H 2.030365 2.819674 -0.330014  
H 3.599472 -1.040997 -1.485790

H 2.248753 -0.457333 -2.455150  
H -2.122709 0.361517 -1.402775  
H -2.367818 1.791974 0.879939  
H -2.937485 -1.209709 1.052533  
H -4.583494 1.039808 -0.261834  
H -5.250410 -0.205607 0.798353  
H -4.097885 0.947449 1.447915  
H -4.075686 -1.063938 -1.796620  
H -4.604096 -2.163748 -0.514768  
H -2.972041 -2.323163 -1.187298  
H 2.077888 -1.146029 2.745386

1-RRS\_c017

C 1.648743 -0.913814 -0.454197  
C 0.872850 1.518550 -0.433568  
C 3.329400 1.010931 -0.290923  
C 2.205311 1.920545 0.199153  
C 3.006205 -0.430826 0.097872  
N 0.559856 0.075207 -0.239410  
C -0.680160 -0.363671 -0.696536  
C -1.862786 0.602713 -0.595563  
N -1.494401 1.844730 0.073554  
C -0.257077 2.408483 0.096573  
O -0.842444 -1.496670 -1.124212  
C -3.084823 -0.032756 0.136107  
C -3.831006 -1.053320 -0.733575  
C -2.708612 -0.610081 1.508194  
O -0.047041 3.541700 0.504528  
C 1.347262 -2.245977 0.252607  
O 1.791483 -3.294996 -0.133501  
O 0.685291 -2.141974 1.432244  
H 0.948005 1.711928 -1.518425  
H 1.733225 -1.142291 -1.522322  
H 4.285915 1.311294 0.151279  
H 3.440442 1.098428 -1.381213  
H 2.119920 1.862245 1.291629  
H 2.380979 2.970632 -0.046043  
H 2.993396 -0.506668 1.193515  
H 3.765161 -1.133447 -0.259779  
H -2.170099 0.808985 -1.633720

H -2.244460 2.461804 0.365663  
H -3.770163 0.813420 0.303255  
H -3.212055 -1.930262 -0.933406  
H -4.744435 -1.377766 -0.222658  
H -4.123685 -0.617062 -1.696434  
H -2.073640 -1.496884 1.402398  
H -3.609473 -0.914837 2.051187  
H -2.183242 0.128692 2.124653  
H 0.395864 -1.216915 1.542071

1-RRS\_c018

C 1.521398 -1.072023 -0.707732  
C 0.776502 1.433061 -0.668544  
C 3.195665 0.734980 -0.155780  
C 2.261482 1.827546 -0.675780  
C 2.945044 -0.545510 -0.952799  
N 0.501280 -0.020023 -0.791209  
C -0.797996 -0.455792 -0.713604  
C -1.828044 0.662377 -0.450772  
N -1.273828 1.564646 0.563454  
C 0.020184 1.983699 0.559798  
O -1.093335 -1.642707 -0.812148  
C -3.229238 0.170417 -0.019139  
C -3.966232 -0.518324 -1.177477  
C -3.212677 -0.706126 1.243994  
O 0.504484 2.738058 1.390501  
C 1.495549 -1.819340 0.633900  
O 2.008580 -2.902341 0.795343  
O 0.906536 -1.123794 1.634052  
H 0.303360 1.918200 -1.536257  
H 1.276625 -1.835747 -1.449819  
H 3.025622 0.563141 0.914373  
H 4.236401 1.059037 -0.267601  
H 2.347131 2.738203 -0.076613  
H 2.555066 2.073393 -1.703440  
H 3.643879 -1.345226 -0.689367  
H 3.071650 -0.343250 -2.024236  
H -1.955998 1.217417 -1.396690  
H -1.858777 1.872492 1.329713  
H -3.783199 1.093130 0.216740

H -3.466503 -1.449226 -1.454720  
H -4.995640 -0.750372 -0.882453  
H -4.012648 0.128498 -2.062521  
H -2.713859 -1.657483 1.046240  
H -4.239309 -0.912032 1.566837  
H -2.694896 -0.217782 2.077874  
H 0.968978 -1.688266 2.427856

1-RRS\_c019

C 1.764552 -0.806969 -0.713805  
C 0.583137 1.520094 -0.603499  
C 3.022628 1.217649 0.120675  
C 1.968920 2.163557 -0.453906  
C 3.091837 -0.030190 -0.760891  
N 0.589069 0.056616 -0.847339  
C -0.612449 -0.603545 -0.906416  
C -1.849903 0.274589 -0.630882  
N -1.546211 1.206522 0.456402  
C -0.343565 1.827554 0.591930  
O -0.691651 -1.805658 -1.135644  
C -3.101338 -0.578203 -0.330798  
C -3.007356 -1.343837 0.998882  
C -4.380995 0.269496 -0.405774  
O -0.053910 2.576566 1.513136  
C 1.674635 -1.590784 0.604313  
O 1.015754 -1.284970 1.571118  
O 2.482998 -2.675320 0.571585  
H 0.095821 1.982745 -1.475556  
H 1.735280 -1.546287 -1.518278  
H 2.769522 0.948111 1.153585  
H 3.995387 1.721447 0.146901  
H 1.840379 3.042318 0.183537  
H 2.308699 2.508005 -1.438333  
H 3.894327 -0.709179 -0.456294  
H 3.295234 0.263002 -1.798926  
H -2.053485 0.847000 -1.553347  
H -2.198274 1.308747 1.222807  
H -3.129052 -1.320126 -1.136230  
H -3.042604 -0.673514 1.866812  
H -3.854731 -2.032425 1.089925

H -2.085223 -1.926680 1.056694  
H -4.409605 1.043549 0.372106  
H -5.264802 -0.362250 -0.264599  
H -4.477768 0.770772 -1.376226  
H 2.394746 -3.108622 1.441442

1-RRS\_c021

C 1.972370 -0.087581 -0.344642  
C 0.253200 1.700729 -0.358728  
C 2.465661 2.200873 0.699092  
C 0.959283 2.456203 0.772250  
C 2.748332 0.696788 0.739885  
N 0.535856 0.250485 -0.295024  
C -0.345356 -0.659063 -0.835715  
C -1.834594 -0.371083 -0.654234  
N -2.105866 1.061355 -0.688187  
C -1.230218 2.065641 -0.422701  
O 0.017812 -1.719985 -1.328346  
C -2.375139 -1.039539 0.652908  
C -3.871442 -0.736112 0.834884  
C -2.135528 -2.556289 0.676877  
O -1.577701 3.234850 -0.315469  
C 2.272085 -1.568032 -0.123915  
O 3.106982 -2.180778 -0.745853  
O 1.650960 -2.069901 0.974515  
H 0.667864 2.079486 -1.310700  
H 2.374251 0.150563 -1.338426  
H 2.982507 2.697447 1.528361  
H 2.866512 2.633747 -0.228680  
H 0.559057 2.116100 1.736371  
H 0.717615 3.516861 0.669044  
H 2.458900 0.297452 1.718899  
H 3.816089 0.491774 0.603468  
H -2.333332 -0.838860 -1.510994  
H -3.071406 1.363639 -0.741476  
H -1.824568 -0.582692 1.487173  
H -4.457608 -1.121696 -0.009945  
H -4.245112 -1.223350 1.741776  
H -4.076059 0.334835 0.938427  
H -2.623075 -3.046674 -0.174680

H -2.558237 -2.981237 1.594395  
H -1.073542 -2.804569 0.639729  
H 1.953868 -2.994397 1.045201

1-RRS\_c022

C 1.724263 -1.011307 -0.428908  
C 0.569640 1.241038 -0.548144  
C 3.044818 1.069125 -1.110296  
C 1.974988 1.759331 -0.236484  
C 2.647441 -0.378907 -1.479393  
N 0.491877 -0.212359 -0.269637  
C -0.721248 -0.871740 -0.281412  
C -1.953814 0.054097 -0.321900  
N -1.644647 1.264364 0.444629  
C -0.505455 1.991264 0.246784  
O -0.803799 -2.091398 -0.241524  
C -3.235441 -0.663338 0.177287  
C -4.355278 0.319162 0.562661  
C -3.747048 -1.637016 -0.897532  
O -0.348775 3.129748 0.659975  
C 2.475477 -1.238969 0.900847  
O 3.591892 -1.695669 0.928371  
O 1.809310 -0.922960 2.029852  
H 0.354199 1.417354 -1.617067  
H 1.402561 -2.005301 -0.755324  
H 3.996280 1.068209 -0.569236  
H 3.207707 1.641696 -2.030563  
H 2.174204 1.586316 0.827467  
H 1.975245 2.843003 -0.371888  
H 3.530320 -1.014079 -1.580913  
H 2.119537 -0.398752 -2.440192  
H -2.114700 0.321318 -1.382926  
H -2.412847 1.788432 0.844042  
H -2.960690 -1.244450 1.065942  
H -4.594341 1.006814 -0.259110  
H -5.267512 -0.240596 0.793612  
H -4.120777 0.911542 1.454890  
H -4.070331 -1.091377 -1.794220  
H -4.612094 -2.192736 -0.519691  
H -2.976168 -2.355447 -1.179797

H 0.939720 -0.560181 1.775572

1-RRS\_c023

C -1.737883 -0.939338 0.615376  
C -0.653537 1.360369 0.443818  
C -3.171846 1.195663 0.753829  
C -2.027397 1.759816 -0.107117  
C -2.789301 -0.153538 1.402786  
N -0.516168 -0.112828 0.416506  
C 0.675566 -0.744337 0.302013  
C 1.923074 0.153064 0.341138  
N 1.626392 1.349320 -0.446439  
C 0.470458 2.061644 -0.330546  
O 0.753805 -1.977378 0.185108  
C 3.195741 -0.584792 -0.145857  
C 4.333595 0.382625 -0.516253  
C 3.680586 -1.566378 0.934198  
O 0.327942 3.184887 -0.789552  
C -2.280205 -1.493108 -0.725446  
O -3.378585 -1.224099 -1.154569  
O -1.448233 -2.323378 -1.368916  
H -0.570290 1.708187 1.487680  
H -1.414204 -1.807124 1.202131  
H -4.056228 1.068579 0.126224  
H -3.432402 1.907429 1.546162  
H -2.103752 1.382891 -1.133159  
H -2.059464 2.849481 -0.168814  
H -3.670829 -0.789656 1.520132  
H -2.381854 0.014149 2.407408  
H 2.085016 0.434093 1.398236  
H 2.398971 1.868475 -0.843436  
H 2.920640 -1.159034 -1.038407  
H 4.571678 1.066323 0.309163  
H 5.241031 -0.188933 -0.736813  
H 4.117271 0.978801 -1.410373  
H 4.004666 -1.026335 1.833948  
H 4.539463 -2.137351 0.565259  
H 2.896443 -2.273096 1.210815  
H -0.610256 -2.422715 -0.850826



1-RRS\_c024  
 C 1.512135 -1.033477 -0.704326  
 C 0.756293 1.460897 -0.664467  
 C 3.173091 0.784558 -0.143012  
 C 2.237184 1.862843 -0.687712  
 C 2.940562 -0.507442 -0.927493  
 N 0.491171 0.010231 -0.827581  
 C -0.805915 -0.435206 -0.733004  
 C -1.836551 0.672211 -0.429932  
 N -1.275670 1.555804 0.597208  
 C 0.021393 1.966857 0.594826  
 O -1.095515 -1.621468 -0.850831  
 C -3.230855 0.164468 0.006005  
 C -3.978932 -0.498080 -1.160594  
 C -3.197087 -0.743499 1.246581  
 O 0.522551 2.685833 1.446052  
 C 1.415469 -1.683074 0.684067  
 O 0.917893 -1.186272 1.667787  
 O 2.015972 -2.895594 0.688582  
 H 0.265014 1.966063 -1.510119  
 H 1.284340 -1.815594 -1.432632  
 H 2.988258 0.625921 0.926492  
 H 4.213527 1.112593 -0.246415  
 H 2.321109 2.785649 -0.107379  
 H 2.526952 2.087181 -1.721631  
 H 3.642088 -1.297314 -0.641356  
 H 3.086103 -0.320125 -1.999227  
 H -1.978162 1.249521 -1.360234  
 H -1.833524 1.790749 1.408088  
 H -3.784461 1.079426 0.270441  
 H -3.479010 -1.419752 -1.467024  
 H -5.003728 -0.742228 -0.859189  
 H -4.038854 0.170352 -2.028719  
 H -2.700040 -1.689022 1.019384  
 H -4.219756 -0.957441 1.577099  
 H -2.667058 -0.279526 2.086297  
 H 1.940772 -3.235014 1.600385

1-RRS\_c026  
 C 1.954232 -0.041420 -0.300033

C 0.192254 1.713984 -0.368269  
 C 2.383344 2.280707 0.699617  
 C 0.870779 2.501876 0.757075  
 C 2.698183 0.784572 0.773662  
 N 0.514256 0.274425 -0.286884  
 C -0.331675 -0.660690 -0.841293  
 C -1.827454 -0.426698 -0.651593  
 N -2.146331 0.996399 -0.694801  
 C -1.303007 2.030702 -0.438730  
 O 0.073805 -1.699757 -1.347467  
 C -2.330504 -1.100887 0.667379  
 C -3.844022 -0.886584 0.833377  
 C -1.991282 -2.597586 0.729056  
 O -1.687322 3.189396 -0.342712  
 C 2.195876 -1.512561 0.042828  
 O 1.755541 -2.078616 1.018155  
 O 3.107784 -2.061629 -0.788082  
 H 0.597920 2.096145 -1.322912  
 H 2.371789 0.160004 -1.295572  
 H 2.881400 2.804433 1.523725  
 H 2.782038 2.705768 -0.232793  
 H 0.471805 2.165385 1.722840  
 H 0.604603 3.554898 0.637171  
 H 2.399744 0.394337 1.753703  
 H 3.773043 0.601394 0.660021  
 H -2.317340 -0.918621 -1.499762  
 H -3.121598 1.266314 -0.744662  
 H -1.814536 -0.590457 1.492382  
 H -4.400072 -1.336007 -0.000209  
 H -4.191696 -1.365141 1.755111  
 H -4.116539 0.172416 0.899241  
 H -2.413830 -3.134848 -0.129013  
 H -2.418706 -3.032514 1.639653  
 H -0.914348 -2.775730 0.740412  
 H 3.252046 -2.971196 -0.465154

1-RRS\_c027  
 C 1.744418 -0.838737 -0.605946  
 C 0.597151 1.413665 -0.503790  
 C 3.150261 1.304517 -0.497561

C 1.889153 1.866758 0.194191  
 C 2.853862 0.000402 -1.265933  
 N 0.510778 -0.057214 -0.496397  
 C -0.649343 -0.770767 -0.390446  
 C -1.953154 0.046454 -0.389598  
 N -1.721440 1.315041 0.299829  
 C -0.610299 2.086511 0.155613  
 O -0.644559 -1.997531 -0.340996  
 C -3.134819 -0.753438 0.223315  
 C -4.304000 0.149059 0.654444  
 C -3.637251 -1.807035 -0.777611  
 O -0.560798 3.254354 0.518759  
 C 2.176753 -1.385876 0.758342  
 O 1.820751 -0.987511 1.842485  
 O 3.067916 -2.393433 0.597483  
 H 0.608815 1.774082 -1.546759  
 H 1.530195 -1.712620 -1.226790  
 H 3.922832 1.128455 0.259505  
 H 3.566380 2.038412 -1.197495  
 H 1.838010 1.517147 1.229508  
 H 1.891595 2.958104 0.218680  
 H 3.751393 -0.617014 -1.366594  
 H 2.515950 0.231620 -2.283247  
 H -2.202063 0.244197 -1.448667  
 H -2.528314 1.826676 0.634162  
 H -2.751883 -1.272638 1.109871  
 H -4.659602 0.777821 -0.172986  
 H -5.147274 -0.472452 0.973578  
 H -4.054670 0.796612 1.502852  
 H -4.065231 -1.325198 -1.667390  
 H -4.425950 -2.415078 -0.320504  
 H -2.828846 -2.469771 -1.088957  
 H 3.310425 -2.689269 1.495225

1-RRS\_c028  
 C 1.707128 -1.011001 -0.614259  
 C 0.582534 1.338003 -0.769926  
 C 3.110562 1.074825 -0.379777  
 C 1.982726 1.950092 -0.927673  
 C 3.014940 -0.311713 -1.018437

N 0.531742 -0.145656 -0.768524  
C -0.676364 -0.753451 -0.530636  
C -1.850750 0.235005 -0.346743  
N -1.383187 1.256767 0.597470  
C -0.167212 1.858111 0.476050  
O -0.785121 -1.968353 -0.408647  
C -3.146477 -0.461663 0.117402  
C -4.215196 0.543668 0.580585  
C -3.713092 -1.332926 -1.016327  
O 0.253591 2.724318 1.228309  
C 1.863171 -1.568483 0.808151  
O 2.540189 -2.536218 1.067382  
O 1.232385 -0.832389 1.751940  
H -0.017882 1.672671 -1.629438  
H 1.552623 -1.894604 -1.238033  
H 3.040978 1.002457 0.712513  
H 4.077125 1.536803 -0.610037  
H 1.960286 2.921306 -0.425743  
H 2.169125 2.128034 -1.993735  
H 3.844179 -0.962959 -0.725709  
H 3.044362 -0.217341 -2.111662  
H -2.059932 0.714359 -1.319231  
H -1.948194 1.513354 1.394704  
H -2.882848 -1.118794 0.955289  
H -3.936458 1.095497 1.485932  
H -4.439779 1.277174 -0.203942  
H -5.144296 0.012181 0.812706  
H -3.999740 -0.715196 -1.878112  
H -4.611913 -1.857177 -0.673621  
H -2.986035 -2.078501 -1.341775  
H 1.418351 -1.268706 2.604945

#### 1-SRS\_c001

C -1.658682 -0.901492 0.509288  
C -0.218886 1.175609 0.450046  
C -2.532076 1.287678 1.508216  
C -1.580528 1.878599 0.447011  
C -2.282190 -0.221561 1.737747  
N -0.390710 -0.259951 0.156547  
C 0.612907 -1.051004 -0.329703

C 1.942413 -0.350227 -0.625175  
N 1.698867 1.025860 -1.052608  
C 0.746571 1.848539 -0.536316  
O 0.484714 -2.258794 -0.504341  
C 2.942283 -0.457920 0.568550  
C 3.251945 -1.920278 0.922028  
C 4.238611 0.306361 0.259472  
O 0.664103 3.037317 -0.813233  
C -2.668099 -0.985709 -0.641372  
O -3.808536 -1.365164 -0.489668  
O -2.165985 -0.624288 -1.841265  
H 0.231175 1.292878 1.451551  
H -1.422192 -1.945402 0.741418  
H -3.566670 1.452803 1.188840  
H -2.413071 1.818295 2.460045  
H -2.007942 1.777855 -0.556590  
H -1.411744 2.945920 0.603828  
H -3.209409 -0.742449 1.988415  
H -1.590696 -0.369555 2.575202  
H 2.368631 -0.890611 -1.476606  
H 2.363710 1.474684 -1.670460  
H 2.466019 0.019290 1.438420  
H 3.744312 -2.426772 0.082545  
H 3.930778 -1.961986 1.781291  
H 2.351474 -2.489865 1.162331  
H 4.737601 -0.111131 -0.625310  
H 4.937099 0.223636 1.099266  
H 4.059757 1.371902 0.083087  
H -2.885920 -0.764984 -2.485543

#### 1-SRS\_c004

C -1.660844 -0.808642 0.653660  
C -0.259076 1.289666 0.308944  
C -2.624419 1.515825 1.201467  
C -1.627652 1.953337 0.112270  
C -2.334959 0.081885 1.700426  
N -0.401078 -0.177322 0.170553  
C 0.579700 -0.980910 -0.300678  
C 1.932748 -0.341698 -0.596941  
N 1.728568 1.012052 -1.102120

C 0.779633 1.880406 -0.655011  
O 0.416538 -2.200681 -0.469206  
C 2.895019 -0.410866 0.629997  
C 3.139082 -1.858856 1.080963  
C 4.225803 0.285649 0.308477  
O 0.749521 3.059086 -0.975769  
C -2.608639 -1.171810 -0.517928  
O -3.713287 -0.694581 -0.642594  
O -2.126723 -2.082889 -1.372717  
H 0.102189 1.519823 1.324606  
H -1.358467 -1.756194 1.115244  
H -3.637542 1.570662 0.798650  
H -2.573109 2.202510 2.054805  
H -2.001453 1.675014 -0.879509  
H -1.478966 3.034954 0.103448  
H -3.258250 -0.409317 2.019147  
H -1.673809 0.113605 2.575295  
H 2.365586 -0.938529 -1.406197  
H 2.436160 1.423600 -1.698413  
H 2.413141 0.137509 1.453266  
H 3.805047 -1.872145 1.950690  
H 2.214093 -2.375362 1.348976  
H 3.618784 -2.440016 0.283876  
H 4.732864 -0.204939 -0.532985  
H 4.897839 0.233387 1.171657  
H 4.091144 1.343483 0.060764  
H -1.214457 -2.352553 -1.093941

#### 1-SRS\_c005

C -1.902931 -0.291856 0.500075  
C -0.084619 1.453163 0.279651  
C -2.444078 2.190466 0.748579  
C -1.151061 2.519659 0.006811  
C -2.949888 0.822844 0.291453  
N -0.572569 0.088060 -0.024516  
C 0.321774 -0.946696 -0.147920  
C 1.742955 -0.641269 -0.619824  
N 1.948089 0.766735 -0.920764  
C 1.200427 1.810437 -0.478468  
O 0.011800 -2.115709 0.056700

C 2.785706 -1.229218 0.373871  
C 4.204285 -1.154462 -0.206907  
C 2.712085 -0.573257 1.759193  
O 1.521574 2.977875 -0.657221  
C -2.470168 -1.552806 -0.148385  
O -3.124085 -2.372657 0.452594  
O -2.330156 -1.555796 -1.496031  
H 0.166298 1.503131 1.354054  
H -1.820012 -0.523800 1.569863  
H -3.204357 2.955136 0.552219  
H -2.267381 2.188552 1.833949  
H -1.339087 2.570943 -1.073015  
H -0.734445 3.484165 0.305317  
H -3.201318 0.869747 -0.775001  
H -3.856661 0.526673 0.829798  
H 1.839677 -1.202508 -1.559198  
H 2.798769 1.036091 -1.401111  
H 2.506844 -2.284517 0.474131  
H 4.552044 -0.117489 -0.299960  
H 4.913117 -1.671796 0.448630  
H 4.262510 -1.625346 -1.196013  
H 2.932587 0.499761 1.707457  
H 3.444256 -1.027282 2.435812  
H 1.723443 -0.703255 2.214864  
H -2.764902 -2.373497 -1.801944

1-SRS\_c008

C -1.910384 -0.269541 0.446850  
C -0.067597 1.461969 0.292686  
C -2.424230 2.213634 0.750224  
C -1.119303 2.545263 0.030295  
C -2.938635 0.863100 0.253477  
N -0.567074 0.108816 -0.038800  
C 0.316287 -0.935092 -0.160390  
C 1.740702 -0.642335 -0.629195  
N 1.965188 0.768404 -0.903703  
C 1.227545 1.814598 -0.450504  
O -0.009024 -2.100384 0.043551  
C 2.777457 -1.262460 0.350611  
C 4.194922 -1.202349 -0.234557

C 2.719840 -0.626492 1.745977  
O 1.564820 2.980615 -0.607664  
C -2.441308 -1.473929 -0.334325  
O -2.455147 -1.569800 -1.539265  
O -3.056627 -2.349766 0.492424  
H 0.176187 1.491495 1.369603  
H -1.849836 -0.545850 1.507599  
H -3.173920 2.990726 0.561856  
H -2.260665 2.185956 1.837372  
H -1.294808 2.621090 -1.050046  
H -0.696171 3.498767 0.354025  
H -3.168007 0.934194 -0.816424  
H -3.860120 0.568976 0.768673  
H 1.826091 -1.187203 -1.579350  
H 2.819614 1.034735 -1.378985  
H 2.481560 -2.314422 0.435879  
H 4.558951 -0.169841 -0.314480  
H 4.897892 -1.740166 0.410795  
H 4.241598 -1.659942 -1.230440  
H 2.960359 0.442817 1.709688  
H 3.444899 -1.104500 2.413755  
H 1.729750 -0.744271 2.201933  
H -3.424117 -3.046611 -0.083181

1-SRS\_c009

C -1.663671 -0.757515 0.611998  
C -0.210881 1.306274 0.421370  
C -2.665448 1.558467 1.079266  
C -1.536719 2.030193 0.136193  
C -2.411700 0.135453 1.618387  
N -0.387102 -0.145630 0.236536  
C 0.547969 -0.984570 -0.299199  
C 1.918198 -0.385716 -0.613557  
N 1.780727 1.017064 -0.992989  
C 0.899275 1.901074 -0.453337  
O 0.325119 -2.178907 -0.478864  
C 2.928573 -0.607440 0.556890  
C 3.140201 -2.099381 0.853986  
C 4.272408 0.073062 0.253439  
O 0.968481 3.108332 -0.642465

C -2.518534 -1.055579 -0.624510  
O -2.416074 -0.541650 -1.713783  
O -3.466775 -1.975793 -0.327812  
H 0.087802 1.508579 1.463565  
H -1.447850 -1.725563 1.071622  
H -3.618265 1.592589 0.539071  
H -2.768464 2.242543 1.929606  
H -1.802206 1.821347 -0.904314  
H -1.358916 3.103917 0.221017  
H -3.347131 -0.357626 1.899362  
H -1.796841 0.180574 2.525219  
H 2.281530 -0.934520 -1.488770  
H 2.524579 1.447127 -1.529637  
H 2.498248 -0.128196 1.449377  
H 3.583394 -2.608682 -0.010929  
H 3.827465 -2.218482 1.699234  
H 2.205472 -2.612487 1.089694  
H 4.721649 -0.335974 -0.661512  
H 4.978639 -0.103307 1.071965  
H 4.173411 1.156832 0.134018  
H -3.981922 -2.110485 -1.145573

1-SRS\_c010

C -1.718577 -0.722365 0.664351  
C -0.206429 1.262350 0.278131  
C -2.649144 1.651283 0.893107  
C -1.504150 1.996720 -0.087556  
C -2.432380 0.286255 1.579265  
N -0.424542 -0.193995 0.218445  
C 0.525923 -1.110975 -0.125384  
C 1.882218 -0.604731 -0.612543  
N 1.862233 0.807233 -0.971948  
C 0.951239 1.744004 -0.601407  
O 0.331175 -2.321349 -0.056472  
C 3.001812 -0.980768 0.401525  
C 4.392271 -0.721542 -0.194452  
C 2.834181 -0.276817 1.754266  
O 1.050852 2.923705 -0.914340  
C -2.644933 -1.159054 -0.476523  
O -3.723229 -1.673358 -0.279457

O -2.161349 -0.914360 -1.713744  
H 0.075560 1.542998 1.306666  
H -1.520706 -1.644777 1.218686  
H -3.600413 1.647432 0.349173  
H -2.738557 2.424582 1.664636  
H -1.772681 1.707549 -1.109178  
H -1.292361 3.067498 -0.104256  
H -3.381436 -0.153192 1.897290  
H -1.817488 0.406856 2.478785  
H 2.070987 -1.178643 -1.528143  
H 2.622755 1.169601 -1.535164  
H 2.885038 -2.060987 0.551907  
H 4.572499 0.349999 -0.349225  
H 5.173679 -1.084419 0.482115  
H 4.521695 -1.233013 -1.156211  
H 2.908837 0.812139 1.648730  
H 3.618433 -0.594486 2.450062  
H 1.869364 -0.513049 2.217630  
H -2.830821 -1.262020 -2.333563

#### 1-SRS\_c011

C -1.521531 -0.812515 0.687123  
C -0.294881 1.362043 0.304093  
C -2.773489 1.414513 0.909532  
C -1.676345 1.937187 -0.047655  
C -2.360417 0.098749 1.598951  
N -0.326556 -0.107111 0.207587  
C 0.684641 -0.891922 -0.265421  
C 1.961804 -0.215329 -0.757729  
N 1.756533 1.199856 -1.046662  
C 0.785035 2.015207 -0.561021  
O 0.592895 -2.117277 -0.295289  
C 3.173986 -0.443402 0.199900  
C 2.900986 0.049681 1.627253  
C 3.653371 -1.901495 0.185442  
O 0.764849 3.221064 -0.774233  
C -2.391709 -1.402929 -0.427943  
O -3.290517 -2.182767 -0.207188  
O -2.094810 -0.952610 -1.666956  
H -0.049313 1.649923 1.339138

H -1.188949 -1.685903 1.255041  
H -3.702603 1.266193 0.347603  
H -2.997009 2.160382 1.680703  
H -1.900964 1.649061 -1.079628  
H -1.601404 3.026093 -0.024968  
H -3.234522 -0.466995 1.933250  
H -1.760227 0.312050 2.491394  
H 2.193276 -0.718324 -1.704036  
H 2.475348 1.683230 -1.574268  
H 3.979528 0.178518 -0.220264  
H 2.128344 -0.556301 2.115877  
H 3.809153 -0.025135 2.235135  
H 2.581348 1.097679 1.641667  
H 2.885480 -2.575338 0.574066  
H 4.555653 -2.005999 0.798790  
H 3.897320 -2.230807 -0.831422  
H -2.708341 -1.413562 -2.270374

#### 1-SRS\_c015

C -1.749538 -0.468679 0.517772  
C -0.213364 1.528503 0.284643  
C -2.632298 1.903564 0.862909  
C -1.433881 2.432377 0.079436  
C -2.954102 0.487879 0.386186  
N -0.506907 0.113306 -0.036315  
C 0.518612 -0.779996 -0.230124  
C 1.865607 -0.258266 -0.730243  
N 1.830891 1.167414 -1.027016  
C 0.973273 2.085050 -0.511354  
O 0.371618 -1.987429 -0.064665  
C 3.050614 -0.620639 0.220595  
C 2.805239 -0.164771 1.665415  
C 3.426141 -2.107426 0.150655  
O 1.123260 3.290815 -0.658451  
C -2.157622 -1.776691 -0.157425  
O -2.664355 -2.700636 0.434706  
O -2.074726 -1.714909 -1.508504  
H 0.070340 1.594434 1.350019  
H -1.592982 -0.720303 1.574673  
H -3.502904 2.553546 0.718635

H -2.410018 1.902794 1.939838  
H -1.673042 2.475283 -0.990655  
H -1.148563 3.441560 0.384746  
H -3.257591 0.523920 -0.666990  
H -3.783222 0.048936 0.951572  
H 2.028653 -0.791463 -1.676056  
H 2.628274 1.568189 -1.509023  
H 3.902765 -0.044987 -0.172213  
H 2.564956 0.903210 1.721670  
H 1.986418 -0.733128 2.122652  
H 3.700227 -0.331238 2.274666  
H 2.618264 -2.738346 0.528105  
H 4.326733 -2.294371 0.746735  
H 3.636998 -2.415539 -0.880553  
H -2.401663 -2.575689 -1.829991

#### 1-SRS\_c016

C -1.719552 -0.692716 0.712050  
C -0.227783 1.290200 0.165706  
C -2.632957 1.711952 0.841856  
C -1.543946 1.977513 -0.217103  
C -2.405747 0.370380 1.574001  
N -0.427540 -0.176000 0.173398  
C 0.526398 -1.072764 -0.158224  
C 1.895890 -0.578862 -0.605413  
N 1.866502 0.812278 -1.032745  
C 0.925936 1.747261 -0.732325  
O 0.332799 -2.299702 -0.109327  
C 2.975002 -0.893148 0.474472  
C 4.383488 -0.635627 -0.078673  
C 2.742986 -0.132039 1.786026  
O 1.001886 2.907308 -1.111078  
C -2.640231 -1.212500 -0.422736  
O -3.718248 -0.722312 -0.669574  
O -2.170229 -2.269280 -1.097528  
H 0.052359 1.609876 1.181825  
H -1.460217 -1.560479 1.330237  
H -3.610745 1.705671 0.356862  
H -2.638963 2.518982 1.583938  
H -1.858501 1.592896 -1.194229

H -1.344779 3.043812 -0.341011  
H -3.355932 -0.041655 1.924491  
H -1.781879 0.526403 2.462928  
H 2.132055 -1.193505 -1.482264  
H 2.625503 1.153484 -1.610709  
H 2.871462 -1.968060 0.668385  
H 4.551004 0.431141 -0.273304  
H 5.142214 -0.954772 0.643832  
H 4.559643 -1.186665 -1.010531  
H 1.763887 -0.359806 2.222957  
H 2.809532 0.951788 1.634258  
H 3.502783 -0.407791 2.525104  
H -1.278727 -2.521261 -0.745109

1-SRS\_c017

C -1.763304 -0.436219 0.464694  
C -0.186426 1.540192 0.294897  
C -2.603283 1.944358 0.860531  
C -1.388935 2.469628 0.099450  
C -2.945177 0.547224 0.344541  
N -0.502391 0.136889 -0.051300  
C 0.508623 -0.772867 -0.242506  
C 1.865186 -0.270960 -0.735951  
N 1.858427 1.159851 -1.010020  
C 1.014235 2.086001 -0.487732  
O 0.338894 -1.977745 -0.077836  
C 3.044104 -0.669680 0.207464  
C 2.807957 -0.231483 1.659339  
C 3.392858 -2.161654 0.113520  
O 1.186414 3.290768 -0.617670  
C -2.155523 -1.679215 -0.338431  
O -2.211996 -1.737940 -1.544551  
O -2.605247 -2.658261 0.479345  
H 0.094212 1.583617 1.362295  
H -1.625346 -0.732075 1.512725  
H -3.460861 2.613019 0.723467  
H -2.391431 1.914634 1.939219  
H -1.618251 2.539965 -0.971158  
H -1.088935 3.466719 0.429490  
H -3.226704 0.611469 -0.713203

H -3.794385 0.113923 0.885151  
H 2.015644 -0.792652 -1.690291  
H 2.662491 1.552103 -1.487800  
H 3.906391 -0.103633 -0.176981  
H 1.977981 -0.790545 2.107834  
H 3.699549 -0.424238 2.265904  
H 2.588223 0.840022 1.732041  
H 2.573735 -2.783750 0.481177  
H 4.290385 -2.374517 0.705628  
H 3.597267 -2.456737 -0.922725  
H -2.898627 -3.381027 -0.106748

1-SRS\_c021

C -1.997323 -0.145681 0.302084  
C -0.278752 1.567357 0.470145  
C -2.456540 2.095226 -0.750717  
C -0.960529 2.422746 -0.623320  
C -2.722835 0.582709 -0.850016  
N -0.530241 0.131672 0.196913  
C 0.330758 -0.575839 -0.571005  
C 1.794103 -0.134764 -0.657826  
N 2.087716 1.056164 0.123202  
C 1.187657 1.948968 0.609470  
O 0.030284 -1.606128 -1.195649  
C 2.721176 -1.323117 -0.266419  
C 4.192161 -0.995784 -0.564170  
C 2.524742 -1.765587 1.189677  
O 1.500366 3.014424 1.121498  
C -2.565712 -1.574396 0.529633  
O -3.545125 -1.653508 1.239619  
O -2.054687 -2.624032 -0.096589  
H -0.731289 1.795766 1.440361  
H -2.287744 0.344978 1.234462  
H -2.875089 2.612257 -1.621905  
H -2.985034 2.486282 0.129686  
H -0.450575 2.231849 -1.578086  
H -0.807677 3.478687 -0.378827  
H -2.372377 0.179160 -1.808474  
H -3.796032 0.379382 -0.777076  
H 1.967064 0.068819 -1.726409

H 3.052907 1.360304 0.177903  
H 2.414420 -2.141955 -0.925516  
H 4.589405 -0.220734 0.104511  
H 4.811958 -1.886136 -0.414641  
H 4.334327 -0.661512 -1.599084  
H 2.752217 -0.953343 1.889200  
H 3.189884 -2.604083 1.422091  
H 1.498408 -2.099324 1.376635  
H -1.267239 -2.342324 -0.641878

1-SRS\_c023

C -1.723660 -0.643549 0.692209  
C -0.225080 1.352134 0.313225  
C -2.732451 1.712811 0.605158  
C -1.478918 2.053047 -0.236518  
C -2.540881 0.428250 1.436353  
N -0.421406 -0.106289 0.284166  
C 0.488037 -1.025721 -0.144809  
C 1.852554 -0.547448 -0.631044  
N 1.914481 0.894224 -0.828522  
C 1.020446 1.835288 -0.430457  
O 0.244981 -2.230417 -0.140208  
C 2.977697 -1.092786 0.295635  
C 4.363229 -0.854843 -0.321086  
C 2.894560 -0.525328 1.718456  
O 1.193077 3.032526 -0.623295  
C -2.492622 -1.168443 -0.525483  
O -2.351111 -0.810009 -1.671655  
O -3.423240 -2.072715 -0.142118  
H -0.072014 1.670980 1.356325  
H -1.553620 -1.501986 1.347263  
H -3.593685 1.600794 -0.062574  
H -2.974133 2.536205 1.286908  
H -1.616452 1.716927 -1.268648  
H -1.283226 3.126986 -0.257852  
H -3.503500 -0.004283 1.726050  
H -2.009571 0.656484 2.367987  
H 1.976805 -1.030715 -1.608952  
H 2.720247 1.274217 -1.311853  
H 2.799293 -2.173891 0.337884

H 4.609830 0.213751 -0.367616  
H 5.139321 -1.335818 0.284215  
H 4.430184 -1.266051 -1.335770  
H 3.024733 0.563466 1.720765  
H 3.682874 -0.954078 2.346888  
H 1.933950 -0.757551 2.192200  
H -3.889674 -2.346526 -0.954374

1-SRS\_c024

C -1.976963 -0.215510 0.380989  
C -0.342177 1.600231 0.530469  
C -2.648261 2.056742 -0.445056  
C -1.166392 2.465150 -0.451410  
C -2.837299 0.541590 -0.636664  
N -0.562073 0.172786 0.248502  
C 0.237286 -0.529814 -0.610138  
C 1.691674 -0.081363 -0.767006  
N 1.999119 1.145709 -0.042553  
C 1.121714 2.019216 0.518288  
O -0.142249 -1.537402 -1.199076  
C 2.635801 -1.250649 -0.364011  
C 4.094760 -0.937059 -0.726578  
C 2.489330 -1.637599 1.113885  
O 1.457040 3.100169 0.984708  
C -2.204917 -1.725441 0.364790  
O -3.090699 -2.277377 -0.243411  
O -1.403206 -2.361327 1.253231  
H -0.694268 1.791911 1.551412  
H -2.267542 0.099377 1.395143  
H -3.186899 2.605639 -1.226038  
H -3.098526 2.356791 0.512581  
H -0.748300 2.337428 -1.459750  
H -1.042077 3.517421 -0.176952  
H -2.540462 0.228531 -1.644476  
H -3.886699 0.258407 -0.510963  
H 1.828856 0.088540 -1.845694  
H 2.954414 1.483351 -0.072816  
H 2.302891 -2.093333 -0.980281  
H 4.509186 -0.128292 -0.110149  
H 4.724306 -1.816939 -0.555313

H 4.200452 -0.652450 -1.780715  
H 2.756876 -0.803050 1.772246  
H 3.153051 -2.476322 1.351902  
H 1.464775 -1.943402 1.350017  
H -1.623778 -3.308536 1.179265

1-SRS\_c030

C -1.529947 -0.760111 0.679618  
C -0.271460 1.397576 0.309809  
C -2.770941 1.481745 0.808756  
C -1.631939 1.977368 -0.112913  
C -2.395365 0.177415 1.540570  
N -0.314041 -0.072206 0.233497  
C 0.664540 -0.873038 -0.277654  
C 1.958275 -0.226059 -0.763888  
N 1.798434 1.201940 -1.013493  
C 0.848899 2.034206 -0.513813  
O 0.533294 -2.094295 -0.334496  
C 3.167548 -0.514308 0.181444  
C 2.918238 -0.042354 1.620176  
C 3.599859 -1.986260 0.133391  
O 0.873568 3.246341 -0.687490  
C -2.320949 -1.294926 -0.519213  
O -2.279826 -0.875143 -1.652286  
O -3.143508 -2.297137 -0.130828  
H -0.068089 1.697250 1.350056  
H -1.233240 -1.632277 1.267986  
H -3.676030 1.329489 0.210409  
H -3.019510 2.242913 1.557151  
H -1.816094 1.661080 -1.144035  
H -1.550333 3.066113 -0.107750  
H -3.287187 -0.368150 1.863830  
H -1.823609 0.404850 2.448244  
H 2.167377 -0.713123 -1.723659  
H 2.538038 1.677760 -1.518834  
H 3.990618 0.089922 -0.230569  
H 2.131081 -0.634762 2.102097  
H 3.827937 -0.156044 2.219799  
H 2.629085 1.013891 1.657645  
H 2.813667 -2.643040 0.514503

H 4.502867 -2.132350 0.737120  
H 3.825161 -2.302002 -0.891975  
H -3.631268 -2.575297 -0.928948

1-SRS\_c032

C -1.867169 -0.320190 0.309692  
C -0.432150 1.640276 0.420829  
C -2.658268 1.773146 -0.830915  
C -1.234589 2.338507 -0.703328  
C -2.680776 0.235143 -0.878130  
N -0.458758 0.173515 0.203318  
C 0.498135 -0.419696 -0.551042  
C 1.898547 0.191430 -0.595005  
N 1.982319 1.483961 0.070757  
C 0.958036 2.246969 0.530285  
O 0.332751 -1.481074 -1.174673  
C 2.966282 -0.779682 0.011381  
C 2.578639 -1.273362 1.411683  
C 3.326435 -1.937068 -0.929098  
O 1.105893 3.370334 0.990399  
C -2.199678 -1.808583 0.606691  
O -3.132186 -2.016225 1.352398  
O -1.546529 -2.788037 -0.003929  
H -0.913749 1.834634 1.384502  
H -2.242571 0.160743 1.216385  
H -3.140247 2.188198 -1.723620  
H -3.254810 2.104774 0.030195  
H -0.689454 2.202155 -1.648000  
H -1.254772 3.412532 -0.493219  
H -2.254628 -0.141794 -1.816053  
H -3.709793 -0.132486 -0.808954  
H 2.130101 0.312222 -1.663281  
H 2.895081 1.922094 0.130291  
H 3.866167 -0.153377 0.113390  
H 1.728648 -1.964021 1.366330  
H 3.415699 -1.812939 1.867124  
H 2.314458 -0.442820 2.075145  
H 3.626389 -1.569298 -1.917785  
H 2.483336 -2.617432 -1.066135  
H 4.167188 -2.503400 -0.513152

H -0.832078 -2.403447 -0.583511

1-SRS\_c035

C 1.855794 -0.362982 -0.529981  
C 0.059077 1.450155 -0.365446  
C 2.375888 2.054054 -1.154529  
C 1.167804 2.506490 -0.338214  
C 2.915257 0.757430 -0.553907  
N 0.547518 0.096058 -0.015921  
C -0.356545 -0.906001 0.239691  
C -1.794958 -0.502393 0.570404  
N -1.837567 0.868845 1.063782  
C -1.087900 1.886097 0.561715  
O -0.044362 -2.092389 0.208449  
C -2.767018 -0.753809 -0.629912  
C -2.825647 -2.235789 -1.028354  
C -4.175772 -0.235464 -0.299061  
O -1.293565 3.063158 0.821799  
C 2.449412 -1.511726 0.283813  
O 3.090464 -2.410753 -0.208395  
O 2.345887 -1.315603 1.619614  
H -0.349987 1.426131 -1.391672  
H 1.724533 -0.763091 -1.543496  
H 3.154841 2.824854 -1.142596  
H 2.093732 1.901582 -2.206439  
H 1.465958 2.688394 0.701291  
H 0.739856 3.440462 -0.710083  
H 3.247719 0.951138 0.473190  
H 3.777892 0.377756 -1.111571  
H -2.096135 -1.162122 1.391636  
H -2.624334 1.159625 1.631297  
H -2.387194 -0.174824 -1.485670  
H -3.215426 -2.843956 -0.202350  
H -3.499448 -2.363867 -1.883099  
H -1.844533 -2.633864 -1.292688  
H -4.584196 -0.744636 0.584347  
H -4.855531 -0.434843 -1.134351  
H -4.191052 0.843071 -0.113175  
H 2.793912 -2.077799 2.031350

1-SRS\_c036

C -1.939999 -0.172552 0.427922  
C -0.269826 1.617043 0.529211  
C -2.589718 2.101699 -0.402528  
C -1.102720 2.490079 -0.438363  
C -2.808542 0.586962 -0.584084  
N -0.525199 0.194573 0.259472  
C 0.225253 -0.511057 -0.642007  
C 1.698016 -0.132513 -0.789533  
N 2.045455 1.105371 -0.101443  
C 1.202352 2.003565 0.472697  
O -0.211646 -1.476711 -1.260393  
C 2.577675 -1.332354 -0.327943  
C 4.058680 -1.088313 -0.652596  
C 2.369325 -1.677404 1.153034  
O 1.572493 3.083059 0.915951  
C -2.098883 -1.694024 0.506505  
O -1.463543 -2.400289 1.255291  
O -3.123537 -2.144582 -0.247682  
H -0.589652 1.821778 1.558083  
H -2.207309 0.168858 1.439186  
H -3.135248 2.655302 -1.175455  
H -3.017921 2.411240 0.562165  
H -0.706772 2.353305 -1.454348  
H -0.960347 3.541938 -0.171239  
H -2.535198 0.265955 -1.595667  
H -3.863090 0.332929 -0.437759  
H 1.862850 -0.004032 -1.869286  
H 3.008941 1.416358 -0.149728  
H 2.227958 -2.175183 -0.935206  
H 4.487465 -0.284681 -0.039502  
H 4.644829 -1.989951 -0.444653  
H 4.208322 -0.830941 -1.708630  
H 2.650230 -0.837579 1.799446  
H 2.994160 -2.533813 1.430233  
H 1.328256 -1.941310 1.365897  
H -3.159072 -3.108393 -0.098950

1-SRS\_c038

C -1.803641 -0.508373 0.415167

C -0.597502 1.622457 0.472181  
C -2.963053 1.530055 -0.470664  
C -1.606657 2.249992 -0.518757  
C -2.815588 0.006028 -0.614118  
N -0.505158 0.170096 0.249960  
C 0.422441 -0.383477 -0.590855  
C 1.763553 0.333270 -0.751405  
N 1.767125 1.673882 -0.174379  
C 0.736257 2.351459 0.394199  
O 0.242391 -1.461886 -1.149936  
C 2.941406 -0.504219 -0.156945  
C 2.713861 -0.867627 1.316663  
C 3.276272 -1.735600 -1.008761  
O 0.835339 3.500575 0.804865  
C -1.706626 -2.031997 0.454850  
O -2.461802 -2.780257 -0.118733  
O -0.782475 -2.453981 1.352265  
H -0.961479 1.778183 1.495027  
H -2.148267 -0.225517 1.421820  
H -3.618466 1.922211 -1.256810  
H -3.456219 1.755179 0.486490  
H -1.183627 2.181679 -1.530793  
H -1.709887 3.312974 -0.279371  
H -2.462768 -0.266616 -1.615508  
H -3.775475 -0.497568 -0.465702  
H 1.926885 0.408865 -1.835675  
H 2.633082 2.200021 -0.223303  
H 3.808477 0.173722 -0.207206  
H 1.873577 -1.561511 1.429604  
H 3.607255 -1.350754 1.727598  
H 2.505866 0.020800 1.922737  
H 2.456122 -2.456844 -1.001386  
H 4.177636 -2.222490 -0.619368  
H 3.468228 -1.459100 -2.052489  
H -0.806684 -3.428506 1.318242

1-SRS\_c042

C 1.719841 -0.776400 -0.684463  
C 0.079153 1.255561 -0.624695  
C 2.625655 1.576462 -0.762402

C 1.245150 2.149118 -1.080149  
C 2.721299 0.173653 -1.362779  
N 0.382170 -0.194127 -0.542791  
C -0.556265 -1.042977 -0.010484  
C -1.840468 -0.394044 0.525889  
N -1.509284 0.886440 1.156730  
C -0.532177 1.726355 0.713819  
O -0.371657 -2.252242 0.080771  
C -2.988776 -0.306214 -0.522771  
C -3.321673 -1.691625 -1.096552  
C -4.233252 0.342111 0.100090  
O -0.219543 2.762645 1.280201  
C 2.254313 -1.166714 0.701359  
O 1.915358 -0.680108 1.755143  
O 3.222938 -2.105085 0.594542  
H -0.724369 1.372778 -1.364886  
H 1.629975 -1.700994 -1.259787  
H 2.786045 1.542104 0.322005  
H 3.399269 2.227985 -1.184119  
H 1.100695 3.121145 -0.601155  
H 1.172399 2.296076 -2.164669  
H 3.722324 -0.256367 -1.256487  
H 2.501675 0.215624 -2.437444  
H -2.170767 -1.071078 1.319570  
H -1.906565 1.110787 2.059912  
H -2.650085 0.336904 -1.347719  
H -2.455592 -2.165837 -1.565918  
H -3.675523 -2.366619 -0.307574  
H -4.116616 -1.607670 -1.846036  
H -4.613129 -0.263580 0.933630  
H -5.035582 0.421934 -0.641684  
H -4.022173 1.348265 0.475912  
H 3.534236 -2.281055 1.502455

#### 1-SRS\_c044

C 1.865816 -0.329866 -0.480534  
C 0.038217 1.461429 -0.373738  
C 2.354582 2.083224 -1.148254  
C 1.132025 2.533131 -0.352164  
C 2.905379 0.806922 -0.515031

N 0.541511 0.119004 -0.005620  
C -0.349328 -0.894518 0.247059  
C -1.793318 -0.510216 0.575301  
N -1.858871 0.867038 1.049183  
C -1.120790 1.889950 0.541847  
O -0.019018 -2.076411 0.213747  
C -2.764969 -0.793620 -0.618277  
C -2.802800 -2.281602 -0.996387  
C -4.180662 -0.292675 -0.290376  
O -1.345208 3.066599 0.787866  
C 2.427297 -1.406269 0.453002  
O 2.479337 -1.325185 1.657631  
O 3.019807 -2.394175 -0.256515  
H -0.364146 1.420388 -1.402117  
H 1.759269 -0.768164 -1.481048  
H 3.122430 2.865209 -1.141956  
H 2.086108 1.907766 -2.200202  
H 1.417060 2.735758 0.687037  
H 0.695532 3.454944 -0.743990  
H 3.213937 1.022414 0.514908  
H 3.785505 0.434883 -1.051313  
H -2.080800 -1.163264 1.406825  
H -2.648355 1.151521 1.615986  
H -2.396717 -0.220739 -1.483199  
H -3.478261 -2.431470 -1.846346  
H -1.816669 -2.667917 -1.259277  
H -3.179728 -2.884285 -0.160462  
H -4.578652 -0.795928 0.601137  
H -4.859581 -0.513951 -1.120873  
H -4.212028 0.787898 -0.119229  
H 3.408584 -2.999319 0.402666

#### 1-SRS\_c045

C -1.514326 -0.839951 0.696987  
C -0.323037 1.345503 0.189520  
C -2.716650 1.415000 1.015188  
C -1.738764 1.865337 -0.087723  
C -2.279813 0.077531 1.654550  
N -0.325833 -0.132913 0.136164  
C 0.714869 -0.880438 -0.293629

C 1.989153 -0.183845 -0.756331  
N 1.726279 1.192262 -1.157973  
C 0.702485 1.988224 -0.748723  
O 0.667777 -2.122843 -0.324895  
C 3.157608 -0.294083 0.275298  
C 2.809353 0.312686 1.640805  
C 3.672652 -1.734079 0.408745  
O 0.607923 3.164434 -1.069068  
C -2.425735 -1.407829 -0.422723  
O -3.569506 -1.047818 -0.582833  
O -1.867102 -2.355241 -1.185949  
H -0.028306 1.658917 1.203307  
H -1.117006 -1.701275 1.246750  
H -3.715322 1.310208 0.587595  
H -2.772963 2.177600 1.800955  
H -2.059505 1.482271 -1.063377  
H -1.687695 2.952764 -0.171216  
H -3.148504 -0.472591 2.026220  
H -1.630763 0.265299 2.518925  
H 2.293584 -0.738734 -1.650939  
H 2.414901 1.658700 -1.737805  
H 3.964675 0.311531 -0.164077  
H 2.477305 1.352966 1.553338  
H 2.023358 -0.262527 2.145769  
H 3.688882 0.304678 2.293520  
H 2.913688 -2.392805 0.839761  
H 4.557892 -1.756466 1.054040  
H 3.955198 -2.150053 -0.565049  
H -0.932035 -2.508519 -0.894891

#### 2-RRSR\_c001

C 1.924063 -0.838949 -0.760143  
C 1.059473 1.464714 -0.200251  
C 3.557373 0.996363 -0.048558  
C 2.304942 1.512426 0.692238  
C 3.201267 -0.063788 -1.115703  
N 0.786590 0.072857 -0.603618  
C -0.439841 -0.375845 -1.003703  
C -1.620445 0.592770 -0.841859  
N -1.351640 1.603660 0.174690



C -0.137494 2.120944 0.495139  
O -0.610240 -1.489339 -1.491440  
C -2.927373 -0.182463 -0.542870  
C -4.156131 0.725625 -0.712719  
C -2.887499 -0.885665 0.830175  
O 0.005935 3.064686 1.261622  
C 2.159302 -1.753939 0.447360  
O 3.134070 -2.464541 0.556535  
O 1.170691 -1.717604 1.367867  
H 1.253632 2.072457 -1.101972  
H 1.665300 -1.522305 -1.575923  
H 4.255446 0.572776 0.681441  
H 4.081394 1.828489 -0.532794  
H 2.101590 0.904085 1.580885  
H 2.432418 2.539196 1.040725  
H 4.015126 -0.780763 -1.247908  
H 3.031612 0.415555 -2.086681  
H -1.746434 1.077305 -1.826377  
H -2.138558 2.094186 0.582864  
H -2.964103 -0.958396 -1.315615  
H -4.212097 1.502905 0.061981  
H -4.152162 1.225270 -1.688870  
H -5.081777 0.146422 -0.644999  
H -2.924304 -0.135043 1.631488  
H -1.925318 -1.400366 0.934106  
H 1.419795 -2.368192 2.051859  
C -4.013652 -1.906576 1.033065  
H -5.005245 -1.440216 1.020831  
H -3.904795 -2.414454 1.997889  
H -3.993729 -2.673844 0.249853

#### 2-RRSR\_c003

C 1.869938 -0.716922 -0.802807  
C 0.790895 1.483905 -0.201170  
C 3.326129 1.333732 -0.333909  
C 2.110760 1.707664 0.541181  
C 2.999405 0.187803 -1.320148  
N 0.650175 0.059632 -0.564487  
C -0.545745 -0.493783 -0.933225  
C -1.781668 0.401454 -0.742466

N -1.578441 1.363689 0.334961  
C -0.403196 1.983649 0.620449  
O -0.638590 -1.609275 -1.435061  
C -3.087072 -0.412179 -0.552587  
C -4.305655 0.435155 -0.959778  
C -3.293522 -0.996912 0.861640  
O -0.298478 2.886046 1.439968  
C 2.341775 -1.535681 0.403416  
O 3.404987 -2.115177 0.431956  
O 1.456606 -1.577620 1.423526  
H 0.801355 2.092638 -1.123702  
H 1.614720 -1.463483 -1.562699  
H 4.158146 1.043140 0.316389  
H 3.666468 2.207557 -0.901562  
H 2.088304 1.103790 1.455126  
H 2.147325 2.750603 0.862470  
H 3.878948 -0.431315 -1.512216  
H 2.673178 0.595316 -2.283864  
H -1.884847 0.938452 -1.703021  
H -2.389262 1.737299 0.813261  
H -2.995962 -1.246283 -1.256888  
H -4.440620 1.307130 -0.305353  
H -4.214864 0.803035 -1.988425  
H -5.224419 -0.157775 -0.896362  
H -4.255313 -1.527117 0.843746  
H -3.427184 -0.178390 1.583536  
H 1.853352 -2.160332 2.099012  
C -2.211551 -1.952488 1.376188  
H -2.040257 -2.775012 0.674877  
H -2.517048 -2.379616 2.338643  
H -1.253309 -1.447053 1.529905

#### 2-RRSR\_c004

C 2.045084 -0.484594 -0.523800  
C 0.733000 1.677046 -0.357298  
C 3.225511 1.714032 0.003804  
C 1.884747 2.299986 0.437072  
C 3.202984 0.203092 0.228747  
N 0.747523 0.194501 -0.305219  
C -0.352295 -0.507166 -0.743856

C -1.698473 0.224870 -0.791719  
N -1.680242 1.456869 -0.018886  
C -0.599471 2.266304 0.126701  
O -0.277928 -1.668121 -1.130678  
C -2.891320 -0.687596 -0.396865  
C -4.198769 -0.137820 -0.994223  
C -3.052040 -0.919661 1.120193  
O -0.666422 3.392862 0.598753  
C 2.046830 -1.947847 -0.087354  
O 2.638983 -2.818573 -0.680499  
O 1.483224 -2.130405 1.131167  
H 0.846621 1.990389 -1.411844  
H 2.265914 -0.502052 -1.599074  
H 4.043983 2.165649 0.575953  
H 3.415001 1.939556 -1.055696  
H 1.721512 2.115673 1.506157  
H 1.836620 3.381494 0.291304  
H 3.094100 -0.000390 1.300814  
H 4.134214 -0.269388 -0.102034  
H -1.831454 0.458848 -1.863319  
H -2.565369 1.886538 0.223886  
H -2.674149 -1.649065 -0.875241  
H -4.475646 0.833933 -0.562824  
H -4.124758 -0.011860 -2.080603  
H -5.029120 -0.822911 -0.792632  
H -3.950877 -1.536934 1.252429  
H -3.275147 0.035594 1.615545  
H 1.582068 -3.080486 1.327933  
C -1.875927 -1.597042 1.830399  
H -1.614568 -2.545898 1.350612  
H -2.134433 -1.802705 2.875631  
H -0.977494 -0.973305 1.830983

#### 2-RRSR\_c005

C 2.052105 -0.619763 -0.369255  
C 0.988121 1.670975 -0.299307  
C 3.335154 1.386070 0.555531  
C 2.005225 2.108378 0.760049  
C 3.104759 -0.122547 0.643080  
N 0.825667 0.200888 -0.337993

C -0.251708 -0.347681 -0.991520  
C -1.571097 0.420050 -0.997823  
N -1.469970 1.724735 -0.361519  
C -0.334661 2.414859 -0.084173  
O -0.206952 -1.456217 -1.514921  
C -2.685906 -0.458325 -0.356632  
C -4.068623 0.172909 -0.585120  
C -2.401163 -0.763870 1.127952  
O -0.342712 3.575538 0.305516  
C 1.732766 -2.066264 0.012982  
O 1.072507 -2.407094 0.968269  
O 2.429343 -2.931919 -0.755797  
H 1.370103 2.005718 -1.280922  
H 2.472932 -0.615841 -1.383160  
H 4.061418 1.696752 1.315381  
H 3.763287 1.652046 -0.421803  
H 1.604516 1.883141 1.756376  
H 2.106089 3.193755 0.690602  
H 2.753731 -0.377174 1.650322  
H 4.030173 -0.682111 0.465654  
H -1.830743 0.547550 -2.060318  
H -2.319950 2.265808 -0.252197  
H -2.643489 -1.400596 -0.915921  
H -4.209615 1.085122 0.010396  
H -4.224474 0.427260 -1.640756  
H -4.864921 -0.518958 -0.295519  
H -2.435812 0.171137 1.703417  
H -1.379563 -1.150396 1.224884  
H 2.227479 -3.821285 -0.408814  
C -3.365317 -1.783131 1.747028  
H -4.395901 -1.412522 1.785228  
H -3.064378 -2.019679 2.773437  
H -3.366187 -2.721523 1.178998

2-RRSR\_c006

C 1.715952 -1.030373 -0.669445  
C 0.960904 1.369429 -0.469178  
C 3.406777 0.865634 -0.965837  
C 2.412630 1.586596 -0.031151  
C 2.801166 -0.421803 -1.570513

N 0.633562 -0.068834 -0.438718  
C -0.646251 -0.549741 -0.398242  
C -1.754122 0.498593 -0.214284  
N -1.246868 1.663255 0.511964  
C -0.002189 2.193243 0.392311  
O -0.903400 -1.742730 -0.536944  
C -3.017802 -0.038829 0.510653  
C -2.680421 -0.673902 1.868861  
C -3.880917 -0.982667 -0.352866  
O 0.330274 3.254060 0.904051  
C 2.328903 -1.602306 0.613488  
O 3.335251 -2.276781 0.620246  
O 1.631051 -1.311532 1.732335  
H 0.846365 1.745641 -1.501790  
H 1.259836 -1.893574 -1.165999  
H 4.314566 0.624085 -0.402749  
H 3.714190 1.532750 -1.779540  
H 2.510104 1.220170 0.996949  
H 2.597436 2.662033 0.006868  
H 3.571186 -1.177450 -1.743643  
H 2.335420 -0.205885 -2.538974  
H -2.049977 0.804093 -1.231203  
H -1.912162 2.237048 1.017533  
H -3.629072 0.860271 0.699544  
H -2.133650 -1.610932 1.731130  
H -2.065862 -0.008004 2.484623  
H -3.600206 -0.891614 2.422994  
H -4.716120 -1.315886 0.277938  
H -3.295068 -1.872622 -0.597901  
H 2.095513 -1.764781 2.461779  
C -4.454858 -0.360104 -1.631382  
H -5.014146 0.560130 -1.418121  
H -5.143246 -1.057823 -2.121060  
H -3.675994 -0.115355 -2.363101

2-RRSR\_c008

C 1.753635 -1.079700 -0.663360  
C 1.185828 1.368377 -0.454342  
C 3.627200 0.660980 -0.605457  
C 2.569368 1.443850 0.201664

C 3.003995 -0.530265 -1.367197  
N 0.735879 -0.034285 -0.515909  
C -0.573790 -0.414974 -0.615585  
C -1.624943 0.697889 -0.491467  
N -1.099244 1.832853 0.265193  
C 0.186767 2.269623 0.276111  
O -0.899933 -1.581199 -0.820437  
C -2.958135 0.228393 0.154247  
C -2.734590 -0.442508 1.518350  
C -3.803856 -0.621518 -0.815805  
O 0.533599 3.317374 0.805419  
C 2.129358 -1.776383 0.649484  
O 3.037972 -2.572963 0.734951  
O 1.343717 -1.442559 1.696001  
H 1.262640 1.770613 -1.480166  
H 1.303203 -1.869936 -1.273050  
H 4.405837 0.303236 0.076845  
H 4.123872 1.323835 -1.323359  
H 2.478642 1.039877 1.216219  
H 2.835982 2.497159 0.308588  
H 3.721551 -1.346383 -1.481401  
H 2.701671 -0.221878 -2.374712  
H -1.853211 1.014325 -1.524314  
H -1.766780 2.470038 0.685166  
H -3.522449 1.161401 0.325266  
H -2.253034 -1.416847 1.394569  
H -2.096750 0.173642 2.161817  
H -3.685087 -0.591217 2.039799  
H -3.301531 -1.578593 -0.980567  
H -3.831255 -0.113553 -1.790952  
H 1.658192 -1.981094 2.447219  
C -5.243905 -0.847831 -0.341256  
H -5.284548 -1.438649 0.580247  
H -5.818544 -1.389489 -1.100799  
H -5.759276 0.102722 -0.151208

2-RRSR\_c009

C -1.992323 -0.808853 0.786406  
C -1.086227 1.482962 0.181866  
C -3.526211 0.968917 -0.275479

C -2.200255 1.481402 -0.872590  
C -3.284418 0.003898 0.906339  
N -0.815776 0.093186 0.609339  
C 0.396415 -0.369053 0.986060  
C 1.606113 0.561838 0.906912  
N 1.355872 1.707827 0.044762  
C 0.153671 2.225477 -0.317589  
O 0.555702 -1.528210 1.406780  
C 2.872555 -0.219323 0.462650  
C 4.134474 0.635178 0.664211  
C 2.742388 -0.770508 -0.972232  
O 0.044796 3.251626 -0.974318  
C -2.063240 -1.860384 -0.351295  
O -2.982305 -1.921513 -1.134782  
O -1.036991 -2.722203 -0.393860  
H -1.433382 2.055110 1.057491  
H -1.813161 -1.358641 1.717807  
H -4.098947 0.461796 -1.053949  
H -4.129194 1.812706 0.080005  
H -1.880796 0.840000 -1.702199  
H -2.292838 2.495299 -1.266830  
H -4.116203 -0.699050 1.004459  
H -3.233209 0.564910 1.847551  
H 1.780936 0.902745 1.942205  
H 2.151587 2.263614 -0.246231  
H 2.925128 -1.071375 1.149489  
H 4.191532 1.472213 -0.045213  
H 4.180054 1.049024 1.678793  
H 5.036863 0.035444 0.515298  
H 2.696499 0.063757 -1.684894  
H 1.788421 -1.304896 -1.061733  
H -0.401613 -2.517380 0.338325  
C 3.870838 -1.726985 -1.375876  
H 4.845058 -1.227164 -1.410765  
H 3.681828 -2.143799 -2.370948  
H 3.948470 -2.566400 -0.674225

2-RRSR\_c010

C 2.034589 -0.451077 -0.471403  
C 0.695762 1.700958 -0.374625

C 3.177690 1.770868 0.045372  
C 1.820603 2.348030 0.438718  
C 3.165374 0.263427 0.294696  
N 0.728778 0.221054 -0.304342  
C -0.348688 -0.501813 -0.761783  
C -1.714792 0.188750 -0.802247  
N -1.720056 1.444697 -0.068592  
C -0.655893 2.276601 0.070266  
O -0.239406 -1.655490 -1.163350  
C -2.868548 -0.749146 -0.350613  
C -4.209458 -0.245203 -0.913454  
C -2.971563 -0.958400 1.174694  
O -0.749975 3.414956 0.508694  
C 1.978273 -1.879899 0.073063  
O 1.559525 -2.194360 1.163309  
O 2.621978 -2.735305 -0.752609  
H 0.829877 2.004312 -1.429623  
H 2.280634 -0.502223 -1.540080  
H 3.977240 2.239800 0.630281  
H 3.390250 1.983233 -1.012513  
H 1.634103 2.175018 1.505799  
H 1.763968 3.426842 0.277007  
H 3.025078 0.074166 1.365561  
H 4.112782 -0.201927 -0.000202  
H -1.880280 0.384617 -1.876531  
H -2.614451 1.864172 0.157563  
H -2.641147 -1.712520 -0.820649  
H -4.505385 0.719726 -0.479270  
H -4.172058 -0.124564 -2.002451  
H -5.011041 -0.954914 -0.682822  
H -3.860441 -1.580282 1.347946  
H -3.185477 0.003699 1.660966  
H 2.603511 -3.602564 -0.305953  
C -1.766117 -1.616946 1.853454  
H -1.508650 -2.569923 1.380505  
H -1.989130 -1.812222 2.908727  
H -0.870811 -0.990022 1.821100

2-RRSR\_c011

C 1.748402 -1.047495 -0.465352

C 1.294107 1.410649 -0.493328  
C 3.596572 0.621177 0.120732  
C 2.518347 1.668694 0.392487  
C 3.026016 -0.777650 0.361155  
N 0.762924 0.042485 -0.301989  
C -0.529080 -0.256384 -0.665728  
C -1.601857 0.813118 -0.498086  
N -1.047458 2.146526 -0.302062  
C 0.256839 2.517429 -0.289476  
O -0.861621 -1.375853 -1.043771  
C -2.587541 0.468275 0.667395  
C -1.862942 0.353902 2.016310  
C -3.470114 -0.768906 0.405777  
O 0.612344 3.681810 -0.155530  
C 1.228350 -2.416975 -0.035934  
O 1.491587 -3.442981 -0.616924  
O 0.612264 -2.389373 1.173724  
H 1.623151 1.505417 -1.544133  
H 2.007882 -1.151073 -1.527215  
H 4.465192 0.785138 0.768714  
H 3.951692 0.712031 -0.915893  
H 2.211262 1.633057 1.445738  
H 2.866419 2.683686 0.187901  
H 2.779068 -0.891218 1.423395  
H 3.754948 -1.555429 0.108144  
H -2.170470 0.803311 -1.435487  
H -1.699483 2.914066 -0.181100  
H -3.261624 1.339742 0.714689  
H -1.197473 -0.516121 2.036007  
H -1.264043 1.245194 2.230503  
H -2.591565 0.239236 2.826532  
H -4.143865 -0.861486 1.268524  
H -2.842025 -1.665332 0.399346  
H 0.371656 -3.314883 1.365722  
C -4.305109 -0.726362 -0.878659  
H -4.881818 0.204571 -0.958747  
H -5.018970 -1.557261 -0.897983  
H -3.676730 -0.821372 -1.770038

2-RRSR\_c012

C 2.043862 -0.532369 -0.788818  
C 0.899048 1.623371 -0.165044  
C 3.178547 1.090773 0.840781  
C 1.742527 1.601227 1.120519  
C 3.276969 0.346791 -0.506007  
N 0.815544 0.266848 -0.726022  
C -0.317270 -0.359448 -1.150929  
C -1.655181 0.373304 -1.056734  
N -1.557649 1.660999 -0.382101  
C -0.450886 2.291056 0.085125  
O -0.285537 -1.497807 -1.614027  
C -2.723222 -0.550970 -0.405769  
C -4.132195 0.035071 -0.587895  
C -2.392795 -0.867902 1.066590  
O -0.497756 3.375644 0.653432  
C 1.976134 -1.695817 0.206228  
O 1.319322 -1.735393 1.222066  
O 2.821380 -2.683997 -0.163507  
H 1.394896 2.278606 -0.898074  
H 2.123847 -0.976257 -1.784774  
H 3.490204 0.427619 1.654925  
H 3.889416 1.924712 0.830737  
H 1.240257 0.939854 1.833335  
H 1.743602 2.608784 1.541530  
H 4.170796 -0.283525 -0.545348  
H 3.367635 1.064260 -1.330022  
H -1.964131 0.540600 -2.100476  
H -2.417790 2.170672 -0.214912  
H -2.660931 -1.482791 -0.980015  
H -4.282886 0.942582 0.012853  
H -4.330205 0.285674 -1.637325  
H -4.897142 -0.681215 -0.273774  
H -2.482039 0.048827 1.665391  
H -1.344857 -1.183560 1.139123  
H 2.751113 -3.375662 0.521357  
C -3.273593 -1.964461 1.677984  
H -4.327186 -1.668352 1.734786  
H -2.944444 -2.197748 2.696554  
H -3.216354 -2.889333 1.091097

2-RRSR\_c013

C 1.807146 -1.087378 -0.409179  
C 1.444818 1.391875 -0.403262  
C 3.673576 0.493848 0.329478  
C 2.620998 1.575163 0.562711  
C 3.035643 -0.884195 0.505687  
N 0.853905 0.038415 -0.297083  
C -0.406813 -0.204108 -0.791985  
C -1.447618 0.912363 -0.732697  
N -0.878562 2.193346 -0.336865  
C 0.431225 2.521415 -0.207062  
O -0.738363 -1.305048 -1.219840  
C -2.640714 0.550120 0.209502  
C -2.160949 0.198853 1.624875  
C -3.566959 -0.517775 -0.405468  
O 0.806723 3.661637 0.034434  
C 1.206628 -2.441869 -0.042573  
O 1.481729 -3.469494 -0.615448  
O 0.495146 -2.407526 1.113025  
H 1.837998 1.516405 -1.428755  
H 2.135099 -1.185482 -1.452422  
H 4.507717 0.611218 1.030736  
H 4.092802 0.591120 -0.682332  
H 2.247782 1.524009 1.593613  
H 3.018551 2.581170 0.410960  
H 2.714398 -1.005026 1.547188  
H 3.747821 -1.687063 0.285790  
H -1.846407 0.992282 -1.754459  
H -1.515339 2.975251 -0.226959  
H -3.227157 1.482210 0.272319  
H -1.614929 -0.750901 1.632531  
H -1.496162 0.974336 2.020093  
H -3.008028 0.110411 2.311864  
H -3.041195 -1.476509 -0.444246  
H -3.771198 -0.244624 -1.450252  
H 0.211562 -3.327250 1.271438  
C -4.901451 -0.673252 0.333656  
H -4.765575 -1.040950 1.356597  
H -5.546825 -1.389428 -0.186924  
H -5.443370 0.279606 0.391394

2-RRSR\_c016

C 2.017320 -0.842262 -0.466361  
C 1.136404 1.563381 -0.290699  
C 3.596349 1.121100 -0.020118  
C 2.406618 1.944016 0.469209  
C 3.307955 -0.358570 0.227175  
N 0.879844 0.096171 -0.285881  
C -0.292336 -0.332048 -0.899327  
C -1.494242 0.616974 -0.868894  
N -1.275064 1.736679 0.036840  
C -0.071842 2.329092 0.266250  
O -0.387844 -1.431366 -1.422887  
C -2.792654 -0.161106 -0.523265  
C -4.030838 0.720621 -0.753011  
C -2.744592 -0.779404 0.889203  
O 0.051939 3.388488 0.863262  
C 1.696460 -2.224332 0.128346  
O 2.214722 -3.233688 -0.271150  
O 0.914044 -2.211839 1.236378  
H 1.264875 1.888354 -1.338616  
H 2.197837 -0.999346 -1.535267  
H 4.509233 1.416728 0.508933  
H 3.773406 1.304422 -1.089586  
H 2.250343 1.780361 1.542783  
H 2.559336 3.017811 0.336643  
H 3.217563 -0.523366 1.309363  
H 4.120189 -1.002038 -0.124427  
H -1.604804 0.983708 -1.904250  
H -2.078092 2.282480 0.326755  
H -2.818891 -0.982561 -1.248444  
H -4.121022 1.519849 -0.004485  
H -4.009584 1.188039 -1.744674  
H -4.947126 0.126846 -0.690997  
H -2.670807 0.019736 1.639416  
H -1.830893 -1.380561 0.976880  
H 0.585851 -1.302137 1.366742  
C -3.940752 -1.681097 1.216843  
H -4.881276 -1.121385 1.261791  
H -3.800607 -2.163900 2.189899

H -4.054980 -2.473926 0.467890

2-RRSR\_c018

C 2.128087 -0.427878 -0.399015  
C 0.708037 1.655729 -0.459773  
C 3.100180 1.824345 0.303602  
C 1.678460 2.342429 0.507874  
C 3.120799 0.312026 0.522663  
N 0.779430 0.179141 -0.361974  
C -0.218528 -0.588247 -0.913694  
C -1.630145 -0.007022 -0.995389  
N -1.726052 1.323652 -0.414560  
C -0.706729 2.203570 -0.241639  
O -0.024764 -1.732419 -1.310512  
C -2.654781 -1.011511 -0.394206  
C -4.097886 -0.558839 -0.664161  
C -2.408923 -1.402164 1.083325  
O -0.886319 3.374128 0.068669  
C 2.144390 -1.894202 0.025421  
O 2.868570 -2.723322 -0.472637  
O 1.412258 -2.126445 1.144153  
H 0.998028 1.951310 -1.484692  
H 2.504873 -0.417824 -1.430115  
H 3.790444 2.312759 1.000914  
H 3.448066 2.066416 -0.711021  
H 1.352276 2.149632 1.537817  
H 1.600216 3.419272 0.342632  
H 2.858170 0.094165 1.564913  
H 4.115447 -0.108640 0.339528  
H -1.851849 0.049666 -2.074278  
H -2.647827 1.732847 -0.315671  
H -2.482347 -1.921560 -0.979822  
H -4.365773 0.362549 -0.132658  
H -4.269231 -0.390433 -1.734264  
H -4.802777 -1.329303 -0.332413  
H -1.369654 -1.735341 1.188999  
H -3.027057 -2.290031 1.276154  
H 1.536138 -3.072873 1.344941  
C -2.717461 -0.355791 2.164037  
H -2.069226 0.521285 2.085949

H -2.565304 -0.792739 3.157669  
H -3.757201 -0.010899 2.119496

2-RRSR\_c022

C 1.708135 -1.067789 -0.418877  
C 1.306529 1.406338 -0.503978  
C 3.583838 0.578172 0.148594  
C 2.525565 1.653000 0.391603  
C 2.980949 -0.802503 0.414212  
N 0.751764 0.049692 -0.308387  
C -0.535872 -0.230941 -0.702058  
C -1.598471 0.841549 -0.509563  
N -1.028740 2.172624 -0.339306  
C 0.280171 2.527227 -0.316831  
O -0.868484 -1.340147 -1.109746  
C -2.543122 0.498273 0.691100  
C -1.773975 0.387689 2.015850  
C -3.425726 -0.745423 0.460793  
O 0.649747 3.688120 -0.189942  
C 1.096091 -2.358133 0.129467  
O 0.541285 -2.468335 1.200001  
O 1.406430 -3.411260 -0.657095  
H 1.646953 1.490660 -1.552114  
H 1.971062 -1.229096 -1.472642  
H 4.450114 0.736467 0.801157  
H 3.949701 0.641168 -0.886426  
H 2.207106 1.640240 1.441858  
H 2.897294 2.657056 0.174863  
H 2.710849 -0.884233 1.473758  
H 3.699511 -1.600604 0.195096  
H -2.197656 0.832883 -1.427142  
H -1.671811 2.947621 -0.218279  
H -3.219051 1.367271 0.756907  
H -1.101883 -0.477478 2.015549  
H -1.177354 1.284718 2.212900  
H -2.477152 0.267501 2.847514  
H -4.072394 -0.837962 1.343824  
H -2.792668 -1.638344 0.442392  
H 1.043765 -4.198141 -0.208173  
C -4.299113 -0.713842 -0.798225

H -4.882002 0.214305 -0.866581  
H -5.010036 -1.547590 -0.791321  
H -3.697324 -0.811378 -1.707546

2-RRSR\_c023

C 1.754304 -1.111228 -0.351917  
C 1.460547 1.381005 -0.399996  
C 3.626321 0.435687 0.447606  
C 2.594079 1.548636 0.617841  
C 2.943694 -0.922386 0.614181  
N 0.836237 0.043388 -0.308505  
C -0.405361 -0.173697 -0.860960  
C -1.439895 0.943473 -0.778405  
N -0.849133 2.230650 -0.437650  
C 0.461929 2.533505 -0.265655  
O -0.727282 -1.258824 -1.334475  
C -2.584468 0.590371 0.228659  
C -2.037949 0.285159 1.630976  
C -3.513281 -0.512128 -0.316848  
O 0.854218 3.671467 -0.039754  
C 1.038729 -2.389195 0.088974  
O 0.367818 -2.505891 1.089925  
O 1.394263 -3.433152 -0.691256  
H 1.904090 1.487145 -1.406821  
H 2.119095 -1.255733 -1.377402  
H 4.430142 0.540881 1.185355  
H 4.094488 0.507767 -0.544736  
H 2.172603 1.522031 1.630821  
H 3.026136 2.541089 0.470830  
H 2.562522 -1.015883 1.638087  
H 3.646869 -1.746519 0.447809  
H -1.887122 1.007148 -1.779915  
H -1.473799 3.025077 -0.350799  
H -3.183594 1.514606 0.289386  
H -1.475326 -0.654899 1.645552  
H -1.372612 1.083659 1.976841  
H -2.854753 0.204073 2.354728  
H -2.971307 -1.462410 -0.345384  
H -3.764328 -0.276244 -1.360508  
H 0.956997 -4.216450 -0.307244

C -4.813371 -0.670404 0.480877  
H -4.627148 -1.004022 1.507311  
H -5.464747 -1.414530 0.009127  
H -5.371745 0.273357 0.532515

2-RRSR\_c024

C 1.918096 -0.562330 -0.831740  
C 0.723785 1.589596 -0.267674  
C 3.230701 1.403899 0.162511  
C 1.856223 1.803087 0.748317  
C 3.091870 0.417295 -1.014779  
N 0.660358 0.167437 -0.648084  
C -0.483390 -0.527481 -0.919196  
C -1.810274 0.233866 -0.826431  
N -1.709199 1.408369 0.030481  
C -0.594119 2.141124 0.281652  
O -0.457504 -1.697089 -1.292917  
C -2.993336 -0.681095 -0.412508  
C -4.325619 -0.074288 -0.886561  
C -3.061056 -1.010838 1.093662  
O -0.620156 3.202125 0.892402  
C 2.173806 -1.516807 0.338503  
O 1.698212 -1.442904 1.448349  
O 3.068163 -2.468204 -0.017221  
H 0.936551 2.194037 -1.165806  
H 1.818458 -1.188272 -1.722307  
H 3.842288 0.958522 0.955159  
H 3.773931 2.289990 -0.185524  
H 1.627567 1.191101 1.626000  
H 1.835732 2.848700 1.061205  
H 4.010432 -0.158594 -1.162377  
H 2.913985 0.965242 -1.947743  
H -2.011582 0.552846 -1.864589  
H -2.568864 1.839311 0.350592  
H -2.825708 -1.613140 -0.963608  
H -4.556974 0.871951 -0.377714  
H -4.319485 0.120923 -1.965366  
H -5.154556 -0.758320 -0.675315  
H -3.967340 -1.613297 1.243607  
H -3.225778 -0.085377 1.663498

H 3.202439 -3.027053 0.771459  
C -1.864173 -1.763567 1.684571  
H -1.657923 -2.684349 1.129071  
H -2.068910 -2.033827 2.727055  
H -0.947185 -1.167230 1.679051

2-RRSR\_c029

C 1.738864 -0.919883 -0.796140  
C 1.093904 1.487890 -0.449181  
C 3.384742 0.693981 0.328762  
C 2.137525 1.547871 0.677792  
C 3.127428 -0.254182 -0.859041  
N 0.685847 0.094475 -0.673028  
C -0.592557 -0.368111 -0.764811  
C -1.753910 0.597511 -0.555237  
N -1.318697 1.981885 -0.386753  
C -0.059921 2.452952 -0.194838  
O -0.823202 -1.553686 -1.002825  
C -2.673618 0.175052 0.635925  
C -1.908652 0.140807 1.966861  
C -3.450694 -1.138211 0.409851  
O 0.174582 3.618890 0.099694  
C 1.679032 -1.895793 0.383486  
O 1.263085 -1.653422 1.493971  
O 2.239072 -3.079321 0.047934  
H 1.557204 1.867881 -1.372813  
H 1.563863 -1.507050 -1.701892  
H 3.681241 0.111932 1.207654  
H 4.235797 1.338033 0.080775  
H 1.665890 1.169431 1.590108  
H 2.395269 2.596004 0.844792  
H 3.887310 -1.040603 -0.906514  
H 3.193071 0.295201 -1.805444  
H -2.347047 0.537735 -1.475875  
H -2.040920 2.672458 -0.209757  
H -3.423357 0.982123 0.694324  
H -1.140174 -0.639795 1.967142  
H -1.419739 1.097857 2.178887  
H -2.598758 -0.066364 2.792354  
H -4.111717 -1.263736 1.278468

H -2.749841 -1.977898 0.420630  
H 2.201795 -3.637177 0.847821  
C -4.290879 -1.197096 -0.870499  
H -4.939890 -0.317337 -0.974993  
H -4.937457 -2.081777 -0.863528  
H -3.658470 -1.267857 -1.761458

2-RRSR\_c030

C 1.822039 -0.943063 -0.761767  
C 1.259739 1.472078 -0.332624  
C 3.456031 0.535835 0.551247  
C 2.213482 1.405357 0.871498  
C 3.240617 -0.345639 -0.695004  
N 0.810987 0.117792 -0.683496  
C -0.472418 -0.275663 -0.920912  
C -1.602192 0.744636 -0.794150  
N -1.128777 2.068234 -0.400722  
C 0.130153 2.466810 -0.087623  
O -0.729909 -1.436667 -1.235855  
C -2.728414 0.270513 0.178366  
C -2.174074 -0.069741 1.569240  
C -3.591783 -0.854740 -0.427821  
O 0.384940 3.592842 0.322626  
C 1.617783 -1.958772 0.366992  
O 1.100075 -1.745006 1.439625  
O 2.168781 -3.148689 0.037221  
H 1.808705 1.893512 -1.189081  
H 1.690925 -1.487023 -1.701109  
H 3.688454 -0.094557 1.416211  
H 4.335445 1.167468 0.382534  
H 1.658614 0.974086 1.710515  
H 2.489756 2.426798 1.141824  
H 3.965050 -1.165313 -0.729338  
H 3.396141 0.242764 -1.606912  
H -2.043398 0.814236 -1.799399  
H -1.833493 2.777817 -0.229576  
H -3.384305 1.151553 0.282227  
H -1.531963 -0.956128 1.536485  
H -1.583289 0.759106 1.974611  
H -2.987210 -0.264433 2.275256

H -2.997948 -1.770842 -0.491784  
H -3.842489 -0.584272 -1.463590  
H 2.033183 -3.735819 0.804808  
C -4.892214 -1.113763 0.341921  
H -4.703740 -1.480958 1.356623  
H -5.497584 -1.869848 -0.170543  
H -5.499916 -0.203243 0.424657

2-RRSR\_c031

C 2.105427 -0.372723 -0.347630  
C 0.640460 1.679652 -0.482482  
C 3.001919 1.912459 0.352214  
C 1.563248 2.401446 0.505804  
C 3.047700 0.403951 0.594499  
N 0.748350 0.207873 -0.369142  
C -0.209085 -0.587636 -0.952533  
C -1.645398 -0.074069 -1.013324  
N -1.784955 1.275511 -0.486829  
C -0.795443 2.187915 -0.311455  
O 0.039462 -1.712879 -1.372745  
C -2.594075 -1.103435 -0.329681  
C -4.067030 -0.728745 -0.553283  
C -2.266556 -1.425311 1.148661  
O -1.015407 3.360205 -0.034484  
C 2.062133 -1.811370 0.170585  
O 1.477381 -2.179828 1.163959  
O 2.908511 -2.599100 -0.528744  
H 0.951981 1.975350 -1.500939  
H 2.517177 -0.385908 -1.365241  
H 3.659064 2.424889 1.064204  
H 3.376186 2.149472 -0.654222  
H 1.210321 2.214987 1.527970  
H 1.466389 3.473912 0.322664  
H 2.744675 0.192879 1.627016  
H 4.059609 0.005433 0.459706  
H -1.908047 -0.074413 -2.083569  
H -2.719726 1.657858 -0.404071  
H -2.402277 -2.025769 -0.890108  
H -4.354753 0.198713 -0.043343  
H -4.291051 -0.609254 -1.620400

H -4.719712 -1.517619 -0.163126  
H -1.209067 -1.704278 1.226254  
H -2.830985 -2.334361 1.398882  
H 2.877006 -3.474562 -0.098976  
C -2.585320 -0.355102 2.202647  
H -1.985234 0.549070 2.068115  
H -2.370964 -0.747420 3.203246  
H -3.641822 -0.062055 2.189714

2-RRSR\_c054

C 2.068791 -0.671227 -0.422561  
C 1.047838 1.634430 -0.291805  
C 3.422479 1.300075 0.469326  
C 2.115094 2.044937 0.728490  
C 3.168491 -0.204545 0.555032  
N 0.853187 0.166501 -0.331738  
C -0.260372 -0.356998 -0.943730  
C -1.545496 0.470938 -0.962843  
N -1.406905 1.743855 -0.272422  
C -0.248791 2.404192 -0.016285  
O -0.271780 -1.478685 -1.439610  
C -2.726038 -0.368624 -0.397193  
C -4.067089 0.335030 -0.661160  
C -2.519781 -0.730177 1.087551  
O -0.219643 3.553972 0.402791  
C 1.809307 -2.145017 -0.120084  
O 2.377760 -3.050680 -0.682719  
O 1.026933 -2.327514 0.973561  
H 1.396191 1.966377 -1.286846  
H 2.454256 -0.646468 -1.450141  
H 4.183066 1.593289 1.201974  
H 3.817130 1.563757 -0.522552  
H 1.748721 1.822030 1.738540  
H 2.233449 3.128717 0.661758  
H 2.859276 -0.460471 1.575635  
H 4.072940 -0.780578 0.331526  
H -1.758828 0.648172 -2.029525  
H -2.241153 2.303097 -0.136376  
H -2.704995 -1.295581 -0.982112  
H -4.190053 1.236115 -0.044968

H -4.166030 0.626747 -1.713794  
H -4.906832 -0.325259 -0.425494  
H -2.540333 0.186318 1.692366  
H -1.517900 -1.158605 1.211685  
H 0.970639 -3.293487 1.096170  
C -3.548865 -1.728220 1.632408  
H -4.564518 -1.317318 1.637409  
H -3.305578 -2.006658 2.663853  
H -3.562994 -2.648189 1.034943

2-RRSS\_c001

C 2.034840 -0.848735 -0.715799  
C 1.017971 1.430373 -0.352042  
C 3.548271 1.162019 -0.255478  
C 2.286655 1.672450 0.474801  
C 3.228437 -0.014114 -1.204829  
N 0.836123 -0.015378 -0.576657  
C -0.369071 -0.605977 -0.829890  
C -1.623275 0.267991 -0.691276  
N -1.379494 1.442296 0.138122  
C -0.196970 2.087213 0.308671  
O -0.468291 -1.780679 -1.172330  
C -2.812830 -0.568038 -0.155190  
C -2.575365 -1.046881 1.285216  
C -4.143829 0.193636 -0.326644  
O -0.095618 3.143143 0.920246  
C 2.401966 -1.630896 0.550433  
O 3.416647 -2.284948 0.648010  
O 1.486434 -1.544535 1.540624  
H 1.135065 1.936421 -1.326644  
H 1.797022 -1.621721 -1.454073  
H 4.291760 0.851725 0.486707  
H 4.006838 1.972229 -0.833996  
H 2.160840 1.159679 1.435136  
H 2.347557 2.739854 0.695644  
H 4.089534 -0.677397 -1.317030  
H 2.977327 0.360612 -2.203832  
H -1.881408 0.582958 -1.717659  
H -2.180865 1.931933 0.518576  
H -2.840106 -1.448814 -0.806783

H -2.561679 -0.209834 1.993260  
H -3.364171 -1.737496 1.598950  
H -1.621507 -1.576478 1.368620  
H -4.187023 0.606550 -1.344572  
H -4.180564 1.056990 0.356021  
H 1.819113 -2.114422 2.260178  
C -5.391419 -0.666474 -0.092052  
H -5.395386 -1.541500 -0.753155  
H -6.302120 -0.091715 -0.293519  
H -5.452287 -1.027231 0.939991

#### 2-RRSS\_c002

C 2.009600 -0.715857 -0.797122  
C 0.816908 1.451263 -0.305684  
C 3.362272 1.412871 -0.363434  
C 2.106345 1.791829 0.452264  
C 3.089021 0.238877 -1.329306  
N 0.752496 -0.000617 -0.552720  
C -0.406709 -0.700854 -0.730657  
C -1.725200 0.041342 -0.479474  
N -1.536786 1.236991 0.333455  
C -0.409351 1.985545 0.439012  
O -0.417799 -1.873561 -1.093859  
C -2.767413 -0.913802 0.156635  
C -2.335268 -1.389310 1.552130  
C -4.188723 -0.312935 0.193167  
O -0.366190 3.040934 1.058586  
C 2.527680 -1.499453 0.414503  
O 3.593092 -2.075314 0.417565  
O 1.686500 -1.507193 1.472271  
H 0.831349 1.982740 -1.273508  
H 1.795787 -1.484773 -1.546714  
H 4.172344 1.149611 0.325382  
H 3.715053 2.274681 -0.941539  
H 2.085599 1.249921 1.404462  
H 2.084435 2.855792 0.695784  
H 3.996977 -0.339774 -1.516220  
H 2.742164 0.616399 -2.298149  
H -2.093836 0.324863 -1.478724  
H -2.350017 1.641454 0.782769

H -2.783766 -1.783327 -0.509975  
H -2.300491 -0.560858 2.269248  
H -3.045949 -2.130763 1.934068  
H -1.345890 -1.855474 1.524263  
H -4.219679 0.556075 0.869201  
H -4.841667 -1.059206 0.664147  
H 2.115166 -2.066525 2.148001  
C -4.780552 0.073440 -1.167558  
H -4.244081 0.907193 -1.635440  
H -5.825970 0.383082 -1.060443  
H -4.753984 -0.772389 -1.865114

#### 2-RRSS\_c003

C 2.156615 -0.505003 -0.513236  
C 0.799704 1.622737 -0.418012  
C 3.290448 1.740185 -0.079360  
C 1.938488 2.310047 0.343013  
C 3.309639 0.236869 0.195620  
N 0.850199 0.148530 -0.282194  
C -0.245085 -0.605290 -0.629865  
C -1.635308 0.014913 -0.494903  
N -1.600938 1.368829 0.036396  
C -0.542917 2.218841 0.020475  
O -0.149195 -1.768247 -1.007716  
C -2.540817 -0.915854 0.360238  
C -2.021335 -1.056048 1.798459  
C -4.021913 -0.481816 0.344823  
O -0.636818 3.400906 0.324588  
C 2.200905 -1.951730 -0.027230  
O 2.813134 -2.826132 -0.593357  
O 1.649981 -2.110898 1.202879  
H 0.914400 1.878261 -1.487370  
H 2.356512 -0.552235 -1.591631  
H 4.102323 2.230986 0.469487  
H 3.465535 1.934037 -1.147527  
H 1.787933 2.163101 1.420034  
H 1.860859 3.382611 0.151806  
H 3.222844 0.066567 1.275534  
H 4.247704 -0.222153 -0.134699  
H -2.040643 0.026968 -1.517701

H -2.481606 1.807947 0.279136  
H -2.470389 -1.892582 -0.132388  
H -2.040975 -0.095515 2.325960  
H -2.648636 -1.757921 2.359417  
H -0.994058 -1.433513 1.819537  
H -4.139501 0.485282 0.857575  
H -4.573330 -1.199483 0.966060  
H 1.779021 -3.051472 1.426574  
C -4.678714 -0.418639 -1.039363  
H -4.255950 0.373736 -1.668314  
H -5.752150 -0.219365 -0.949208  
H -4.559791 -1.367085 -1.576813

#### 2-RRSS\_c005

C 1.809891 -1.015215 -0.633954  
C 1.125436 1.397314 -0.343198  
C 3.599270 0.802972 -0.425210  
C 2.472549 1.482442 0.380033  
C 3.080614 -0.403873 -1.242734  
N 0.744195 -0.014099 -0.540635  
C -0.535228 -0.414423 -0.813143  
C -1.603938 0.690072 -0.754946  
N -1.220182 1.717128 0.213002  
C 0.042997 2.176595 0.412765  
O -0.811390 -1.571124 -1.118113  
C -3.031385 0.177045 -0.428277  
C -3.662514 -0.541295 -1.630744  
C -3.078222 -0.655214 0.870668  
O 0.306015 3.144751 1.113054  
C 2.120959 -1.721914 0.690044  
O 3.090826 -2.430125 0.850088  
O 1.197805 -1.510566 1.652634  
H 1.224816 1.887336 -1.328703  
H 1.428881 -1.807462 -1.287596  
H 4.384444 0.479030 0.266083  
H 4.063793 1.524703 -1.107130  
H 2.356916 1.009665 1.361887  
H 2.688483 2.535671 0.571054  
H 3.839419 -1.186506 -1.316282  
H 2.834222 -0.094154 -2.264794



H -1.638625 1.130742 -1.767293  
H -1.954373 2.272313 0.637456  
H -3.620143 1.094379 -0.256012  
H -3.127444 -1.467209 -1.851992  
H -4.712096 -0.779444 -1.431235  
H -3.636815 0.093173 -2.525604  
H -2.452834 -0.164821 1.628548  
H -2.622378 -1.632166 0.678402  
H 1.482830 -2.045877 2.417734  
C -4.490888 -0.837298 1.437640  
H -4.968480 0.129400 1.643354  
H -4.460178 -1.396796 2.379248  
H -5.141825 -1.389910 0.751330

#### 2-RRSS\_c006

C 2.149945 -0.467695 -0.445088  
C 0.768967 1.643872 -0.442233  
C 3.227677 1.792281 0.062175  
C 1.843733 2.346150 0.394596  
C 3.246661 0.287934 0.333730  
N 0.828845 0.173017 -0.295368  
C -0.236769 -0.596725 -0.696740  
C -1.644150 -0.029676 -0.544474  
N -1.654010 1.362352 -0.120056  
C -0.608693 2.227642 -0.110594  
O -0.100394 -1.745393 -1.105138  
C -2.456379 -0.939829 0.424524  
C -1.842087 -0.974398 1.831506  
C -3.950007 -0.556006 0.479932  
O -0.738528 3.420945 0.131429  
C 2.119059 -1.889362 0.119689  
O 1.673160 -2.202280 1.200595  
O 2.815164 -2.736293 -0.669896  
H 0.958098 1.896578 -1.501527  
H 2.414382 -0.524977 -1.509065  
H 3.995207 2.289389 0.666466  
H 3.472020 1.993663 -0.990914  
H 1.623505 2.194550 1.458913  
H 1.766308 3.417746 0.197788  
H 3.086074 0.110654 1.403847

H 4.212705 -0.155987 0.067796  
H -2.098117 -0.112745 -1.541757  
H -2.550743 1.795387 0.068361  
H -2.381045 -1.941821 -0.014895  
H -1.849256 0.020432 2.292264  
H -2.421142 -1.644109 2.477217  
H -0.809262 -1.336702 1.816605  
H -4.067708 0.431700 0.951318  
H -4.436370 -1.258466 1.169081  
H 2.806873 -3.597837 -0.211856  
C -4.694194 -0.584163 -0.860835  
H -4.342905 0.190443 -1.553113  
H -5.766758 -0.418483 -0.711184  
H -4.573512 -1.552979 -1.360428

#### 2-RRSS\_c008

C 2.149939 -0.643066 -0.350367  
C 1.027848 1.616757 -0.408097  
C 3.417316 1.460793 0.355243  
C 2.078147 2.164564 0.564276  
C 3.234790 -0.042101 0.567686  
N 0.902997 0.145880 -0.315368  
C -0.195731 -0.481726 -0.851448  
C -1.538528 0.241887 -0.817775  
N -1.432563 1.613228 -0.342638  
C -0.301702 2.349936 -0.200080  
O -0.150163 -1.627807 -1.286475  
C -2.549807 -0.594169 0.022253  
C -2.110995 -0.720621 1.488355  
C -3.979359 -0.034136 -0.133651  
O -0.318872 3.544975 0.066344  
C 1.894841 -2.064529 0.154592  
O 1.303681 -2.348726 1.171860  
O 2.568075 -2.968531 -0.590227  
H 1.359641 1.874777 -1.430263  
H 2.519737 -0.703916 -1.382221  
H 4.167497 1.847245 1.054726  
H 3.794137 1.661010 -0.658225  
H 1.728665 2.011231 1.593055  
H 2.145443 3.242699 0.402687

H 2.939525 -0.228131 1.607330  
H 4.166942 -0.589573 0.387569  
H -1.900244 0.241159 -1.857241  
H -2.288597 2.145761 -0.238506  
H -2.525755 -1.589563 -0.437889  
H -2.093408 0.258353 1.981851  
H -2.801252 -1.362666 2.044267  
H -1.113543 -1.163926 1.572035  
H -4.163828 0.183027 -1.195881  
H -4.067964 0.923714 0.400632  
H 2.411776 -3.833957 -0.167396  
C -5.077136 -0.980162 0.368305  
H -5.024535 -1.948751 -0.143151  
H -6.069980 -0.556548 0.180556  
H -4.996810 -1.165559 1.444329

#### 2-RRSS\_c010

C -2.083445 -0.834592 0.746179  
C -1.064779 1.450296 0.320987  
C -3.558947 1.137190 -0.010260  
C -2.243263 1.632915 -0.643776  
C -3.306489 0.036764 1.043353  
N -0.862194 0.008038 0.578511  
C 0.337886 -0.566800 0.810641  
C 1.603580 0.285177 0.728535  
N 1.373302 1.542364 0.031766  
C 0.187296 2.168121 -0.183646  
O 0.444698 -1.772087 1.097358  
C 2.761063 -0.521579 0.078334  
C 2.456885 -0.883755 -1.383145  
C 4.104425 0.219155 0.248667  
O 0.105084 3.267636 -0.713291  
C -2.299474 -1.751557 -0.486461  
O -3.266779 -1.669205 -1.207496  
O -1.342468 -2.668990 -0.686476  
H -1.314053 1.942269 1.275112  
H -1.880905 -1.491917 1.599927  
H -4.213473 0.753196 -0.794659  
H -4.080387 1.971493 0.473530  
H -2.022770 1.071026 -1.558933

H -2.292849 2.688499 -0.918253  
H -4.175859 -0.621096 1.127838  
H -3.155852 0.487894 2.031853  
H 1.892556 0.484423 1.774857  
H 2.183706 2.078407 -0.255715  
H 2.811830 -1.448459 0.660730  
H 2.375433 0.010626 -2.011491  
H 3.247868 -1.514327 -1.799656  
H 1.520010 -1.444131 -1.467793  
H 4.184015 0.577158 1.285183  
H 4.128787 1.115082 -0.390414  
H -0.649067 -2.581956 0.016275  
C 5.334239 -0.639871 -0.069276  
H 5.351819 -1.545432 0.548824  
H 6.256430 -0.082685 0.128191  
H 5.356867 -0.950494 -1.118891

2-RRSS\_c011

C -1.925914 -0.833381 0.331574  
C -1.167410 1.550783 0.378589  
C -3.396970 1.013812 -0.646737  
C -2.160989 1.906474 -0.733591  
C -2.975695 -0.453315 -0.736454  
N -0.793835 0.118791 0.340546  
C 0.341679 -0.316283 0.984762  
C 1.551607 0.613812 1.047123  
N 1.245270 1.968620 0.610057  
C 0.029921 2.502098 0.329325  
O 0.434684 -1.447474 1.450298  
C 2.763788 0.052882 0.232406  
C 3.423686 -1.143006 0.932558  
C 2.387454 -0.231009 -1.234709  
O -0.126934 3.687640 0.066150  
C -1.516937 -2.276759 0.050366  
O -2.026259 -3.230479 0.589760  
O -0.673967 -2.388834 -1.007605  
H -1.668177 1.750184 1.343526  
H -2.396330 -0.850466 1.323572  
H -4.099760 1.250257 -1.453889  
H -3.926016 1.198605 0.299325

H -1.668602 1.778886 -1.706289  
H -2.406744 2.965739 -0.629971  
H -2.547004 -0.648759 -1.726572  
H -3.832728 -1.124118 -0.611125  
H 1.848286 0.632713 2.105618  
H 2.006796 2.638474 0.591293  
H 3.495225 0.878303 0.235092  
H 2.758371 -2.009340 0.947292  
H 4.352595 -1.419451 0.423655  
H 3.676441 -0.900953 1.971767  
H 1.800498 0.614000 -1.616683  
H 1.727719 -1.106854 -1.273605  
H -0.528419 -3.346213 -1.124419  
C 3.592362 -0.448370 -2.157306  
H 4.271606 0.413483 -2.136410  
H 3.264495 -0.584392 -3.193904  
H 4.172013 -1.335240 -1.878757

2-RRSS\_c014

C 2.112253 -0.662925 -0.747446  
C 0.985713 1.551158 -0.326456  
C 3.332799 1.157679 0.584949  
C 1.912802 1.696312 0.891866  
C 3.351568 0.247799 -0.659207  
N 0.881680 0.134290 -0.704738  
C -0.269048 -0.545470 -0.968664  
C -1.607314 0.186668 -0.874043  
N -1.480151 1.552162 -0.382408  
C -0.352798 2.239404 -0.071036  
O -0.253736 -1.733686 -1.283841  
C -2.609064 -0.651386 -0.029548  
C -2.169743 -0.758824 1.437893  
C -4.045386 -0.111664 -0.189371  
O -0.375614 3.386421 0.359447  
C 2.121842 -1.690288 0.389942  
O 1.540119 -1.596017 1.447187  
O 2.943882 -2.720601 0.090060  
H 1.422744 2.110010 -1.168635  
H 2.131988 -1.229411 -1.682316  
H 3.704933 0.606019 1.454979

H 4.031823 1.985533 0.420759  
H 1.466022 1.130739 1.715359  
H 1.930844 2.749565 1.179590  
H 4.247476 -0.380618 -0.676127  
H 3.381657 0.854198 -1.572123  
H -1.993868 0.213913 -1.904794  
H -2.333486 2.075019 -0.221049  
H -2.571067 -1.650654 -0.479411  
H -2.212827 0.215404 1.939674  
H -2.820685 -1.445230 1.988260  
H -1.146567 -1.139021 1.523406  
H -4.242000 0.065211 -1.256788  
H -4.139608 0.865019 0.309464  
H 2.927306 -3.318650 0.861088  
C -5.129439 -1.047617 0.358851  
H -5.069874 -2.035877 -0.112791  
H -6.128202 -0.642715 0.161270  
H -5.039628 -1.187624 1.441021

2-RRSS\_c015

C 2.053095 -0.594928 -0.820641  
C 0.801124 1.547083 -0.379947  
C 3.264489 1.392844 0.254902  
C 1.849978 1.833713 0.707750  
C 3.213108 0.411748 -0.933294  
N 0.773606 0.106724 -0.674793  
C -0.339938 -0.670723 -0.785347  
C -1.714534 -0.035819 -0.582320  
N -1.646968 1.355809 -0.155389  
C -0.552108 2.140940 0.003653  
O -0.262306 -1.868596 -1.050683  
C -2.553502 -0.905963 0.395883  
C -1.951296 -0.921111 1.808283  
C -4.040058 -0.494068 0.432168  
O -0.621034 3.300179 0.394671  
C 2.278017 -1.546470 0.359540  
O 1.796798 -1.446783 1.465509  
O 3.163092 -2.512551 0.025486  
H 1.088387 2.089400 -1.294485  
H 2.011789 -1.216408 -1.719186

H 3.784619 0.927429 1.099228  
H 3.864212 2.262398 -0.036979  
H 1.553337 1.283249 1.605931  
H 1.811855 2.899691 0.941442  
H 4.150520 -0.145032 -1.027716  
H 3.082754 0.961184 -1.873158  
H -2.194759 -0.083310 -1.570204  
H -2.516525 1.816460 0.088392  
H -2.492088 -1.918527 -0.019656  
H -1.990563 0.072315 2.270718  
H -2.514434 -1.607651 2.450391  
H -0.907275 -1.250552 1.802094  
H -4.141959 0.521433 0.845396  
H -4.538411 -1.146817 1.160635  
H 3.281273 -3.063560 0.822199  
C -4.786675 -0.586853 -0.904340  
H -4.417295 0.134112 -1.643339  
H -5.854837 -0.386248 -0.765817  
H -4.689652 -1.587643 -1.342207

2-RRSS\_c017

C 1.855246 -0.829765 -0.451752  
C 1.008080 1.550712 -0.513874  
C 3.427120 1.121666 0.033100  
C 2.209292 1.993193 0.328123  
C 3.085621 -0.335993 0.338810  
N 0.714043 0.106682 -0.352781  
C -0.483080 -0.396435 -0.809782  
C -1.698653 0.530172 -0.838523  
N -1.412724 1.836487 -0.258822  
C -0.198447 2.438050 -0.187826  
O -0.601646 -1.562330 -1.173450  
C -2.961271 -0.104483 -0.171505  
C -3.677335 -1.053577 -1.146294  
C -2.715941 -0.800596 1.184101  
O -0.054573 3.614655 0.117424  
C 1.534047 -2.228587 0.068503  
O 1.992668 -3.238089 -0.411959  
O 0.841546 -2.210823 1.234699  
H 1.257799 1.739594 -1.573993

H 2.125542 -0.964876 -1.507073  
H 4.282923 1.440213 0.639218  
H 3.724431 1.230620 -1.019916  
H 1.945639 1.924592 1.391130  
H 2.390256 3.048483 0.111955  
H 2.877738 -0.440591 1.410656  
H 3.918677 -1.005587 0.099487  
H -1.936085 0.653342 -1.908001  
H -2.197478 2.452573 -0.078202  
H -3.636748 0.747466 0.010354  
H -3.049054 -1.916179 -1.381122  
H -4.614141 -1.412591 -0.705773  
H -3.924390 -0.546525 -2.087164  
H -2.052300 -1.658433 1.025708  
H -3.681318 -1.216356 1.502645  
H 0.746548 -3.145929 1.495472  
C -2.160237 0.075072 2.313864  
H -1.136491 0.401915 2.112688  
H -2.146592 -0.487614 3.254435  
H -2.774801 0.969822 2.473347

2-RRSS\_c020

C -1.913896 -0.770213 0.275613  
C -1.088413 1.593758 0.392257  
C -3.288862 1.139507 -0.726863  
C -2.023504 1.994798 -0.754017  
C -2.908827 -0.338897 -0.823437  
N -0.764060 0.151529 0.352328  
C 0.328831 -0.326720 1.038593  
C 1.585305 0.535609 1.087733  
N 1.328383 1.922777 0.725409  
C 0.143710 2.501727 0.406393  
O 0.349784 -1.450583 1.530242  
C 2.724923 -0.058722 0.193484  
C 3.316366 -1.339349 0.798738  
C 2.280499 -0.230049 -1.272687  
O 0.035246 3.697720 0.166203  
C -1.455017 -2.183111 -0.088921  
O -0.719048 -2.464660 -1.007899  
O -2.119671 -3.107101 0.638922

H -1.620238 1.802110 1.338614  
H -2.419924 -0.811943 1.249219  
H -3.952391 1.407764 -1.557030  
H -3.848006 1.328732 0.200850  
H -1.497477 1.862382 -1.708123  
H -2.241020 3.059876 -0.646372  
H -2.439765 -0.532882 -1.795375  
H -3.792075 -0.983737 -0.749745  
H 1.929710 0.495189 2.129938  
H 2.115056 2.563092 0.731801  
H 3.513700 0.712041 0.216913  
H 2.593084 -2.158096 0.776739  
H 4.209356 -1.645620 0.244902  
H 3.611955 -1.183986 1.843248  
H 1.756592 0.680965 -1.589634  
H 1.549955 -1.045877 -1.340261  
H -1.827488 -3.975119 0.302168  
C 3.437775 -0.490360 -2.244292  
H 3.070328 -0.538404 -3.275281  
H 3.946917 -1.437403 -2.035384  
H 4.187639 0.309904 -2.196662

2-RRSS\_c024

C 1.839156 -0.797850 -0.405500  
C 0.968780 1.573645 -0.532921  
C 3.377708 1.181053 0.078860  
C 2.143958 2.044480 0.329866  
C 3.043648 -0.274630 0.403715  
N 0.691427 0.129520 -0.357854  
C -0.485995 -0.395855 -0.840139  
C -1.727492 0.492831 -0.849475  
N -1.461723 1.824551 -0.320160  
C -0.258424 2.447001 -0.249304  
O -0.567974 -1.557823 -1.226717  
C -2.936791 -0.167692 -0.109302  
C -3.655468 -1.170494 -1.026494  
C -2.607339 -0.816075 1.252681  
O -0.137235 3.634269 0.023828  
C 1.455533 -2.145915 0.207368  
O 0.868859 -2.296314 1.254671

O 2.005492 -3.164064 -0.491086  
H 1.240605 1.752185 -1.589364  
H 2.132572 -0.966447 -1.449821  
H 4.215129 1.519175 0.699937  
H 3.699572 1.275170 -0.968426  
H 1.856239 1.990784 1.387432  
H 2.318903 3.097765 0.099336  
H 2.801957 -0.361384 1.469910  
H 3.893154 -0.937350 0.203880  
H -2.013281 0.577287 -1.910120  
H -2.257322 2.430943 -0.154823  
H -3.635023 0.664623 0.077694  
H -3.005137 -2.016536 -1.261832  
H -4.559166 -1.550063 -0.536832  
H -3.959023 -0.702111 -1.970988  
H -1.916288 -1.652333 1.095235  
H -3.542525 -1.259339 1.620867  
H 1.777015 -3.977864 -0.003582  
C -2.042974 0.110360 2.336855  
H -1.034240 0.454653 2.094466  
H -1.983271 -0.424500 3.291365  
H -2.676740 0.993147 2.488926

2-RRSS\_c026

C 1.917683 -0.750249 -0.727982  
C 1.048324 1.569893 -0.283242  
C 3.239190 0.839376 0.790677  
C 1.881671 1.554822 1.008935  
C 3.247336 -0.006893 -0.497624  
N 0.791717 0.191006 -0.722656  
C -0.410496 -0.329407 -1.100026  
C -1.653511 0.558533 -1.060049  
N -1.379992 1.893123 -0.536784  
C -0.204623 2.421976 -0.113185  
O -0.503814 -1.497397 -1.475360  
C -2.829466 -0.093934 -0.265050  
C -3.497924 -1.229249 -1.053620  
C -2.403363 -0.504094 1.158316  
O -0.116651 3.552323 0.351361  
C 1.717621 -1.826216 0.344243

O 1.092482 -1.704034 1.373165  
O 2.407467 -2.944888 0.026879  
H 1.625101 2.087271 -1.065509  
H 1.941192 -1.266246 -1.691595  
H 3.454364 0.202097 1.654955  
H 4.054622 1.569145 0.732442  
H 1.298856 1.029680 1.772147  
H 2.013982 2.587375 1.338963  
H 4.058141 -0.741956 -0.482171  
H 3.426229 0.632241 -1.370276  
H -1.977237 0.650376 -2.107695  
H -2.173653 2.512860 -0.413235  
H -3.573327 0.714986 -0.167529  
H -2.821580 -2.078837 -1.167075  
H -4.409091 -1.563878 -0.547445  
H -3.785002 -0.892665 -2.057588  
H -1.834548 0.320845 1.606802  
H -1.715008 -1.355554 1.099905  
H 2.265126 -3.572400 0.760544  
C -3.575310 -0.848534 2.085010  
H -4.285842 -0.015046 2.156934  
H -3.214780 -1.064469 3.096759  
H -4.128283 -1.728912 1.739981

2-RRSS\_c028

C 2.122049 -0.860283 -0.601100  
C 0.994964 1.494744 -0.322079  
C 3.377348 1.387058 -0.989087  
C 2.392523 1.995492 0.006500  
C 3.471426 -0.118012 -0.733808  
N 0.917778 0.012294 -0.417871  
C -0.294958 -0.538651 -0.683339  
C -1.519031 0.378097 -0.521215  
N -1.261585 1.380530 0.506377  
C -0.069097 2.018414 0.651499  
O -0.441251 -1.714656 -1.050329  
C -2.802138 -0.433182 -0.220647  
C -2.738208 -1.144332 1.140704  
C -4.055609 0.455468 -0.377717  
O 0.133838 2.930467 1.437162

C 2.206930 -1.876053 0.589622  
O 3.051385 -1.807676 1.451225  
O 1.288764 -2.849010 0.584777  
H 0.730139 1.901200 -1.314227  
H 1.919639 -1.440638 -1.508272  
H 4.372423 1.830384 -0.873561  
H 3.051430 1.604445 -2.016443  
H 2.659761 1.723593 1.034482  
H 2.369636 3.087539 -0.037853  
H 4.010238 -0.273176 0.204618  
H 4.051852 -0.613359 -1.519571  
H -1.663673 0.870244 -1.500762  
H -2.028966 1.720460 1.071733  
H -2.834153 -1.201284 -1.001751  
H -2.730749 -0.432621 1.974785  
H -3.604734 -1.798736 1.273269  
H -1.843273 -1.767957 1.219587  
H -3.969793 1.027581 -1.312248  
H -4.098643 1.199709 0.431826  
H 0.640075 -2.686607 -0.145327  
C -5.374858 -0.325656 -0.398782  
H -5.372190 -1.079949 -1.194803  
H -6.219411 0.347918 -0.580150  
H -5.562891 -0.840135 0.549138

2-RRSS\_c032

C 2.221059 -0.388860 -0.373949  
C 0.716391 1.651741 -0.451984  
C 3.153583 1.938356 0.104256  
C 1.734707 2.421792 0.394837  
C 3.245718 0.445967 0.421124  
N 0.864150 0.186511 -0.311489  
C -0.125323 -0.639389 -0.788991  
C -1.574720 -0.150363 -0.739046  
N -1.684126 1.196391 -0.195022  
C -0.700365 2.127887 -0.113546  
O 0.111349 -1.771499 -1.198106  
C -2.424403 -1.192832 0.048562  
C -2.110928 -1.171217 1.551916  
C -3.937679 -1.133652 -0.268450

O -0.914361 3.291058 0.203896  
C 2.222503 -1.788037 0.245135  
O 1.687341 -2.093904 1.286324  
O 3.043801 -2.614366 -0.439681  
H 0.892366 1.923109 -1.508914  
H 2.539157 -0.476130 -1.420836  
H 3.879013 2.493725 0.709787  
H 3.410143 2.122937 -0.949037  
H 1.499888 2.278248 1.456947  
H 1.604225 3.484639 0.179405  
H 3.057277 0.292780 1.490631  
H 4.242578 0.047434 0.202137  
H -1.925165 -0.161504 -1.783399  
H -2.608348 1.553481 0.011065  
H -2.079488 -2.153933 -0.348262  
H -2.369184 -0.214502 2.017961  
H -2.677120 -1.957309 2.064342  
H -1.046411 -1.354973 1.733574  
H -4.390928 -2.009039 0.215478  
H -4.074687 -1.285059 -1.348294  
H 3.044767 -3.458346 0.050003  
C -4.726725 0.112603 0.161687  
H -4.558950 0.365858 1.214623  
H -5.801576 -0.059226 0.036984  
H -4.485678 0.993209 -0.447396

#### 2-RRSS\_c035

C 1.767118 -0.833694 -0.759620  
C 0.902672 1.516894 -0.451255  
C 3.363554 1.019681 0.010071  
C 2.066689 1.673361 0.540502  
C 3.071328 -0.067376 -1.043734  
N 0.630718 0.087453 -0.680401  
C -0.602572 -0.468223 -0.870255  
C -1.817955 0.460187 -0.810371  
N -1.520483 1.696864 -0.093095  
C -0.313913 2.301865 0.041827  
O -0.734768 -1.663966 -1.123950  
C -3.094244 -0.216343 -0.224880  
C -3.805657 -1.055420 -1.298909

C -2.888517 -1.046602 1.060707  
O -0.181149 3.421595 0.520348  
C 1.870666 -1.670932 0.519949  
O 1.351706 -1.428803 1.585257  
O 2.671587 -2.743037 0.317075  
H 1.187852 1.987183 -1.407237  
H 1.573414 -1.540743 -1.570615  
H 3.917679 0.588060 0.851319  
H 4.020756 1.774413 -0.436956  
H 1.762410 1.202308 1.480160  
H 2.199377 2.739080 0.736246  
H 3.893084 -0.786187 -1.112946  
H 2.969104 0.387159 -2.036281  
H -2.045548 0.702820 -1.862781  
H -2.305377 2.263369 0.208170  
H -3.762838 0.623629 0.027495  
H -3.175586 -1.891448 -1.612610  
H -4.746631 -1.456622 -0.906181  
H -4.044695 -0.453191 -2.184408  
H -2.300552 -1.936338 0.811618  
H -3.882272 -1.407832 1.359015  
H 2.705067 -3.225059 1.164951  
C -2.244894 -0.328275 2.253170  
H -1.191643 -0.094308 2.073473  
H -2.284769 -0.969904 3.140936  
H -2.765123 0.606345 2.498057

#### 2-RRSS\_c037

C 2.037403 -0.865348 -0.733392  
C 0.958465 1.508408 -0.607044  
C 3.402036 1.107970 0.054932  
C 2.373281 2.093747 -0.497933  
C 3.395268 -0.147121 -0.818758  
N 0.897428 0.046499 -0.852891  
C -0.332646 -0.562592 -0.878646  
C -1.523477 0.369584 -0.574488  
N -1.152579 1.283368 0.508112  
C 0.079304 1.850443 0.614447  
O -0.468282 -1.760801 -1.100874  
C -2.807361 -0.424291 -0.249171

C -2.711812 -1.181644 1.086644  
C -4.048986 0.488941 -0.333826  
O 0.426661 2.580779 1.530726  
C 1.942108 -1.630150 0.595561  
O 1.311498 -1.289121 1.569568  
O 2.708236 -2.744765 0.562290  
H 0.466113 1.991978 -1.464728  
H 1.958558 -1.611502 -1.528152  
H 3.166119 0.855979 1.096282  
H 4.395286 1.570786 0.051205  
H 2.298548 2.980670 0.136810  
H 2.700818 2.418277 -1.493242  
H 4.175173 -0.858073 -0.528777  
H 3.584991 0.130280 -1.863699  
H -1.718582 0.954278 -1.490947  
H -1.777009 1.403533 1.294560  
H -2.878429 -1.172393 -1.047678  
H -2.766850 -0.506300 1.950191  
H -3.537372 -1.893473 1.181630  
H -1.777156 -1.743071 1.153734  
H -4.017581 1.038574 -1.285095  
H -4.007961 1.252517 0.457111  
H 2.618461 -3.164894 1.438457  
C -5.384384 -0.257881 -0.238837  
H -5.454112 -1.039434 -1.005466  
H -6.224435 0.429785 -0.386591  
H -5.518609 -0.735730 0.737243

#### 2-RRSS\_c038

C 2.012256 -0.691607 -0.836087  
C 0.708183 1.545327 -0.496799  
C 3.219105 1.369006 -0.015189  
C 2.060417 2.270496 -0.440274  
C 3.279744 0.170797 -0.963411  
N 0.779583 0.098925 -0.819311  
C -0.380277 -0.635473 -0.804502  
C -1.636152 0.146654 -0.369061  
N -1.289407 1.045724 0.733931  
C -0.116427 1.731915 0.794579  
O -0.407087 -1.826612 -1.094511

C -2.797388 -0.800524 0.003727  
C -2.509850 -1.614543 1.276960  
C -4.150191 -0.064175 0.112998  
O 0.218016 2.445972 1.728379  
C 2.091572 -1.539847 0.442293  
O 1.498500 -1.329025 1.474896  
O 2.966670 -2.559831 0.285796  
H 0.112763 2.016646 -1.293861  
H 1.953374 -1.393992 -1.671461  
H 3.080666 1.035655 1.020883  
H 4.157912 1.933021 -0.050964  
H 1.939371 3.107861 0.252039  
H 2.284120 2.682449 -1.431970  
H 4.146891 -0.467919 -0.769071  
H 3.365938 0.524390 -1.998944  
H -1.950841 0.747682 -1.238270  
H -1.861114 1.052315 1.568319  
H -2.858497 -1.507560 -0.831807  
H -2.525099 -0.991482 2.180148  
H -3.278530 -2.384575 1.405835  
H -1.537473 -2.109219 1.222638  
H -4.101189 0.697894 0.904965  
H -4.892287 -0.796234 0.457618  
H 2.983737 -3.038709 1.135844  
C -4.658547 0.578556 -1.182726  
H -4.019102 1.402689 -1.519560  
H -5.664185 0.989781 -1.041303  
H -4.711148 -0.156747 -1.994954

#### 2-RRSS\_c054

C -2.166919 -0.667910 0.412318  
C -1.053711 1.594307 0.402553  
C -3.474336 1.421032 -0.256986  
C -2.149117 2.129943 -0.526150  
C -3.293554 -0.082240 -0.466013  
N -0.920607 0.122306 0.310174  
C 0.204679 -0.494472 0.801655  
C 1.530226 0.265790 0.776358  
N 1.400514 1.613952 0.245449  
C 0.258301 2.338463 0.131412

O 0.195882 -1.651039 1.209568  
C 2.592722 -0.564977 0.000788  
C 2.216033 -0.735854 -1.478045  
C 4.003039 0.029653 0.197463  
O 0.254327 3.527173 -0.161373  
C -1.995200 -2.125386 -0.008188  
O -2.566893 -3.045390 0.527075  
O -1.295180 -2.260297 -1.163257  
H -1.342974 1.853070 1.437407  
H -2.494401 -0.701299 1.459586  
H -4.255448 1.799833 -0.926078  
H -3.808885 1.625035 0.770421  
H -1.842494 1.973544 -1.568155  
H -2.215172 3.208661 -0.368159  
H -3.049410 -0.273605 -1.517925  
H -4.211060 -0.634707 -0.236082  
H 1.858847 0.311960 1.826701  
H 2.247570 2.154608 0.112862  
H 2.571877 -1.549274 0.483597  
H 2.206145 0.228293 -1.999631  
H 2.933521 -1.385527 -1.988801  
H 1.225736 -1.189991 -1.585743  
H 4.143317 0.268922 1.261455  
H 4.091452 0.980284 -0.349839  
H -1.290071 -3.216551 -1.355253  
C 5.138330 -0.900342 -0.248031  
H 5.086350 -1.861941 0.276523  
H 6.114311 -0.453094 -0.029729  
H 5.103402 -1.103638 -1.323415

#### 2-SRSR\_c003

C -2.135793 -0.540373 0.517040  
C -0.646412 1.488314 0.293329  
C -3.089703 1.811960 0.795878  
C -1.881320 2.360432 0.041147  
C -3.361565 0.380223 0.335270  
N -0.899645 0.064235 -0.025635  
C 0.155564 -0.801345 -0.177522  
C 1.489634 -0.255790 -0.686999  
N 1.453071 1.174747 -0.948261

C 0.553540 2.069403 -0.465001  
O 0.053959 -2.007338 0.021807  
C 2.654015 -0.692718 0.247461  
C 2.526465 -0.076896 1.647816  
C 4.017893 -0.401375 -0.410632  
O 0.678992 3.278511 -0.609100  
C -2.491186 -1.875023 -0.134840  
O -2.986637 -2.798395 0.467528  
O -2.374185 -1.844707 -1.484470  
H -0.400037 1.568256 1.367199  
H -1.995934 -0.761682 1.583164  
H -3.971806 2.436707 0.614554  
H -2.900544 1.834582 1.878895  
H -2.089186 2.384753 -1.036079  
H -1.630100 3.379757 0.342604  
H -3.635824 0.389750 -0.726497  
H -4.194681 -0.070186 0.885587  
H 1.636265 -0.768519 -1.647825  
H 2.242805 1.594219 -1.425260  
H 2.542788 -1.780663 0.334402  
H 2.598465 1.016877 1.612511  
H 1.571537 -0.346152 2.113975  
H 3.317527 -0.439382 2.311071  
H 4.189015 0.684664 -0.446807  
H 3.986765 -0.745883 -1.454612  
H -2.668310 -2.722294 -1.791964  
C 5.207972 -1.070101 0.287838  
H 5.345158 -0.700132 1.309390  
H 6.137367 -0.875300 -0.258535  
H 5.073078 -2.157092 0.340655

#### 2-SRSR\_c007

C -1.952263 -0.829983 0.678624  
C -0.643323 1.294333 0.297406  
C -3.104131 1.441902 0.946033  
C -2.008850 1.910956 -0.040044  
C -2.743856 0.098829 1.614036  
N -0.725751 -0.174238 0.210853  
C 0.292513 -0.992885 -0.182941  
C 1.581441 -0.357115 -0.699939

N 1.428440 1.059168 -1.008912  
C 0.451804 1.901443 -0.583005  
O 0.207762 -2.217131 -0.138495  
C 2.769070 -0.667417 0.258249  
C 2.586516 -0.010072 1.632988  
C 4.110494 -0.295681 -0.405890  
O 0.445972 3.096410 -0.851286  
C -2.853482 -1.350247 -0.447207  
O -3.856872 -1.993134 -0.233269  
O -2.442093 -1.020067 -1.690789  
H -0.376879 1.580379 1.328465  
H -1.655495 -1.731236 1.223389  
H -4.055693 1.348222 0.410694  
H -3.263488 2.193636 1.727503  
H -2.262145 1.615796 -1.063833  
H -1.897732 2.996958 -0.037995  
H -3.639693 -0.433495 1.944463  
H -2.127657 0.271248 2.504260  
H 1.781038 -0.883910 -1.641427  
H 2.145714 1.506610 -1.567798  
H 2.742708 -1.757779 0.383949  
H 2.584752 1.083632 1.552906  
H 1.646609 -0.321727 2.102761  
H 3.394395 -0.291293 2.315121  
H 4.187400 0.797776 -0.496263  
H 4.116997 -0.693836 -1.430932  
H -3.085187 -1.430282 -2.300179  
C 5.346987 -0.824894 0.330537  
H 5.447721 -0.388972 1.330113  
H 6.260590 -0.585070 -0.224570  
H 5.301555 -1.914792 0.443407

2-SRSR\_c009

C -2.145645 -0.529391 0.461133  
C -0.643743 1.500998 0.306236  
C -3.091513 1.821296 0.785781  
C -1.872543 2.382327 0.057629  
C -3.362189 0.402288 0.286247  
N -0.898432 0.084565 -0.038974  
C 0.154928 -0.783825 -0.184619

C 1.491747 -0.240327 -0.687805  
N 1.465800 1.195617 -0.920681  
C 0.566044 2.087271 -0.432418  
O 0.046331 -1.989453 0.015060  
C 2.656343 -0.703342 0.232890  
C 2.542754 -0.107309 1.643052  
C 4.019697 -0.416438 -0.428216  
O 0.698952 3.297900 -0.555863  
C -2.463572 -1.806174 -0.320892  
O -2.477577 -1.897834 -1.526204  
O -2.899638 -2.782082 0.507843  
H -0.406111 1.562758 1.383380  
H -2.023100 -0.793978 1.519533  
H -3.969205 2.453248 0.607870  
H -2.915633 1.818473 1.871315  
H -2.067728 2.429818 -1.021037  
H -1.622046 3.394208 0.383814  
H -3.613092 0.435678 -0.780616  
H -4.210111 -0.054148 0.809553  
H 1.629124 -0.735911 -1.659105  
H 2.258706 1.618256 -1.389467  
H 2.534254 -1.791250 0.303925  
H 2.628572 0.985853 1.623640  
H 1.586040 -0.370719 2.108996  
H 3.331637 -0.490051 2.297509  
H 4.201133 0.668317 -0.451143  
H 3.979864 -0.746935 -1.476342  
H -3.144447 -3.530814 -0.067906  
C 5.206965 -1.105398 0.255201  
H 5.353446 -0.749604 1.280510  
H 6.135217 -0.912942 -0.293955  
H 5.061712 -2.191633 0.295106

2-SRSR\_c010

C -1.712181 -0.984017 0.632472  
C -0.705032 1.336999 0.330899  
C -3.056858 1.118961 1.264354  
C -2.172293 1.755418 0.175965  
C -2.513092 -0.255756 1.714498  
N -0.590288 -0.129025 0.155247

C 0.511020 -0.734449 -0.343869  
C 1.723460 0.142248 -0.637304  
N 1.269185 1.443107 -1.121577  
C 0.193934 2.122625 -0.635782  
O 0.562916 -1.959808 -0.544132  
C 2.691706 0.249513 0.584426  
C 3.903242 1.124673 0.224466  
C 3.117549 -1.124098 1.154098  
O -0.050385 3.283840 -0.927331  
C -2.598981 -1.471824 -0.540982  
O -3.770511 -1.188503 -0.643118  
O -1.978070 -2.261051 -1.427383  
H -0.367054 1.601923 1.345991  
H -1.241814 -1.877153 1.060614  
H -4.070963 1.006759 0.875903  
H -3.111414 1.779361 2.137986  
H -2.511598 1.445883 -0.818983  
H -2.215077 2.846181 0.199923  
H -3.330747 -0.909773 2.029615  
H -1.851878 -0.134309 2.581532  
H 2.246680 -0.350243 -1.461116  
H 1.883605 1.985554 -1.716543  
H 2.135278 0.767530 1.379870  
H 4.462261 0.713582 -0.624370  
H 3.603788 2.146642 -0.029047  
H 4.591207 1.186767 1.074681  
H 2.229459 -1.661332 1.505992  
H 3.726583 -0.924039 2.045963  
H -1.029661 -2.377666 -1.164691  
C 3.898933 -2.041881 0.204470  
H 3.282976 -2.357755 -0.643098  
H 4.209510 -2.948978 0.734383  
H 4.806527 -1.563808 -0.180848

2-SRSR\_c012

C -1.973336 -0.751698 0.676877  
C -0.627724 1.335886 0.222213  
C -3.146457 1.522448 0.570459  
C -1.945155 1.904558 -0.325978  
C -2.862332 0.263224 1.414728

N -0.703999 -0.134492 0.275007  
C 0.344065 -0.981911 0.061435  
C 1.682957 -0.392220 -0.375169  
N 1.574648 0.991288 -0.820668  
C 0.559840 1.862884 -0.587411  
O 0.246902 -2.197418 0.207502  
C 2.758246 -0.610528 0.729674  
C 2.409265 0.128053 2.029364  
C 4.175380 -0.234117 0.251691  
O 0.587349 3.026701 -0.967961  
C -2.747365 -1.400595 -0.476228  
O -3.753831 -2.049980 -0.300199  
O -2.223905 -1.171530 -1.700448  
H -0.476898 1.726302 1.242352  
H -1.738141 -1.585412 1.344994  
H -4.028476 1.357532 -0.058696  
H -3.399648 2.348874 1.244284  
H -2.081250 1.509656 -1.338207  
H -1.833118 2.986722 -0.415952  
H -3.789288 -0.240696 1.701299  
H -2.347436 0.536781 2.343140  
H 1.967922 -1.000359 -1.240767  
H 2.347164 1.388321 -1.342811  
H 2.738405 -1.690388 0.925744  
H 2.382828 1.213720 1.876897  
H 1.437907 -0.187268 2.426845  
H 3.160181 -0.077923 2.799955  
H 4.859587 -0.393276 1.095341  
H 4.218527 0.844818 0.041919  
H -2.796327 -1.653493 -2.327493  
C 4.693666 -1.022369 -0.957630  
H 4.646416 -2.102718 -0.775969  
H 5.737497 -0.765169 -1.168276  
H 4.121178 -0.817461 -1.870271

2-SRSR\_c015

C -1.707561 -1.027026 0.565304  
C -0.605839 1.266673 0.438970  
C -2.846818 1.031087 1.611880  
C -2.053924 1.765629 0.515009

C -2.337131 -0.413435 1.818142  
N -0.596942 -0.167455 0.071008  
C 0.404040 -0.749781 -0.628752  
C 1.629353 0.105355 -0.939563  
N 1.192889 1.471448 -1.214671  
C 0.218618 2.129725 -0.527299  
O 0.357054 -1.937020 -0.991336  
C 2.720746 0.006806 0.177138  
C 3.866658 0.986922 -0.116950  
C 3.230684 -1.442104 0.333958  
O 0.007960 3.327187 -0.648371  
C -2.748455 -1.314232 -0.546329  
O -3.905014 -0.967765 -0.470752  
O -2.280048 -2.005515 -1.593399  
H -0.137012 1.384471 1.429732  
H -1.246497 -1.989347 0.817428  
H -3.902720 1.014665 1.335030  
H -2.764580 1.572472 2.561831  
H -2.520869 1.605146 -0.463247  
H -2.028979 2.844576 0.680388  
H -3.151212 -1.066696 2.143809  
H -1.576452 -0.435689 2.608407  
H 2.045173 -0.303124 -1.865763  
H 1.766277 2.058050 -1.808604  
H 2.246348 0.310354 1.123536  
H 4.352451 0.746932 -1.072290  
H 3.517495 2.023183 -0.159232  
H 4.631261 0.935647 0.663301  
H 3.788645 -1.718912 -0.572251  
H 2.379106 -2.128239 0.378550  
H -1.316466 -2.197651 -1.463245  
C 4.111903 -1.665755 1.569058  
H 5.041165 -1.087214 1.532457  
H 4.389061 -2.722123 1.653693  
H 3.582909 -1.388723 2.489579

2-SRSR\_c024

C -1.714021 -0.985801 0.524737  
C -0.595721 1.285556 0.541349  
C -2.967883 1.048472 1.460151

C -2.035123 1.823551 0.503917  
C -2.461182 -0.383810 1.728657  
N -0.582350 -0.135960 0.150194  
C 0.402874 -0.732596 -0.584175  
C 1.633231 0.114681 -0.907051  
N 1.242577 1.511563 -1.074876  
C 0.303928 2.163269 -0.337687  
O 0.333035 -1.908957 -0.931689  
C 2.773835 -0.087230 0.146337  
C 3.916440 0.910243 -0.102684  
C 3.283963 -1.544760 0.146990  
O 0.167158 3.379381 -0.359325  
C -2.648626 -1.219529 -0.667077  
O -2.719372 -0.550369 -1.671097  
O -3.443098 -2.291865 -0.435934  
H -0.204669 1.386327 1.567708  
H -1.317645 -1.968186 0.794659  
H -3.974170 1.017107 1.027353  
H -3.060769 1.573639 2.417865  
H -2.389546 1.731595 -0.526848  
H -2.001562 2.887911 0.744049  
H -3.281891 -1.052145 2.005695  
H -1.759671 -0.382703 2.571533  
H 1.992059 -0.247943 -1.875793  
H 1.846816 2.121671 -1.612187  
H 2.341958 0.129252 1.136332  
H 4.724961 0.763336 0.619408  
H 4.342939 0.774135 -1.105906  
H 3.584940 1.948976 -0.008305  
H 3.839333 -1.721383 -0.785847  
H 2.431305 -2.229342 0.120502  
H -4.017622 -2.380036 -1.219766  
C 4.171930 -1.895562 1.347278  
H 5.091437 -1.300853 1.378367  
H 4.466680 -2.950147 1.310424  
H 3.639881 -1.734844 2.293429

2-SRSR\_c032

C -1.977427 -0.752405 0.701010  
C -0.643871 1.333044 0.129384



C -3.119799 1.554989 0.614035  
C -1.987494 1.862772 -0.385992  
C -2.821710 0.286436 1.444312  
N -0.704286 -0.142573 0.216171  
C 0.350094 -0.959609 0.003204  
C 1.692612 -0.363682 -0.396518  
N 1.565950 0.997802 -0.896875  
C 0.524055 1.851863 -0.714111  
O 0.269291 -2.194702 0.120983  
C 2.729907 -0.521057 0.756857  
C 2.318372 0.250447 2.018397  
C 4.151487 -0.121420 0.311527  
O 0.519724 2.993427 -1.152448  
C -2.760078 -1.425930 -0.456457  
O -3.856924 -1.057305 -0.809295  
O -2.146865 -2.472264 -1.023757  
H -0.472487 1.736092 1.140064  
H -1.682671 -1.552429 1.390469  
H -4.056068 1.426658 0.067991  
H -3.253363 2.399206 1.300840  
H -2.192363 1.389097 -1.353066  
H -1.881872 2.934040 -0.568167  
H -3.751978 -0.195961 1.756311  
H -2.281247 0.553168 2.361080  
H 2.024940 -0.996046 -1.226506  
H 2.329579 1.381574 -1.441148  
H 2.733387 -1.594524 0.987305  
H 1.348221 -0.083084 2.404258  
H 3.054689 0.098306 2.814874  
H 2.260569 1.328230 1.825435  
H 4.810394 -0.234962 1.182014  
H 4.171156 0.950818 0.068235  
H -1.263599 -2.612800 -0.595943  
C 4.730824 -0.933797 -0.853360  
H 5.774792 -0.656414 -1.034593  
H 4.188425 -0.771830 -1.792745  
H 4.704209 -2.008908 -0.639370

2-SRSR\_c034

C -1.971765 -0.707235 0.671011

C -0.626732 1.387647 0.246937  
C -3.165921 1.548446 0.422257  
C -1.910755 1.940732 -0.392827  
C -2.911611 0.323046 1.323318  
N -0.696980 -0.081884 0.306371  
C 0.326416 -0.937908 0.026445  
C 1.675477 -0.361435 -0.391891  
N 1.603461 1.048857 -0.750395  
C 0.602855 1.927609 -0.485988  
O 0.198642 -2.156808 0.114752  
C 2.751152 -0.671524 0.691043  
C 2.437334 0.016223 2.026991  
C 4.177689 -0.324184 0.219245  
O 0.668413 3.113040 -0.787326  
C -2.626226 -1.351721 -0.555627  
O -2.422999 -1.065287 -1.712510  
O -3.530596 -2.282958 -0.171901  
H -0.542695 1.784260 1.271561  
H -1.766725 -1.518523 1.374373  
H -3.990881 1.339812 -0.267864  
H -3.493417 2.383532 1.052053  
H -1.975341 1.530119 -1.405038  
H -1.805225 3.023882 -0.479562  
H -3.848547 -0.175839 1.589139  
H -2.447477 0.636275 2.266084  
H 1.936104 -0.926687 -1.293627  
H 2.396535 1.462193 -1.227275  
H 2.693896 -1.758203 0.834808  
H 2.457084 1.108121 1.927752  
H 1.453477 -0.274881 2.411733  
H 3.180165 -0.259976 2.783317  
H 4.860438 -0.541543 1.051080  
H 4.258210 0.760517 0.054283  
H -3.922662 -2.637725 -0.992080  
C 4.662104 -1.079201 -1.024851  
H 4.581578 -2.163890 -0.885715  
H 5.712203 -0.846986 -1.233545  
H 4.090123 -0.820124 -1.923805

2-SRSR\_c040

C -1.952894 -0.778774 0.696532  
C -0.690459 1.375010 0.323349  
C -3.216869 1.450959 0.659588  
C -2.023323 1.939727 -0.196422  
C -2.868891 0.186786 1.470357  
N -0.724930 -0.095762 0.275615  
C 0.274546 -0.902764 -0.178757  
C 1.568026 -0.269166 -0.682275  
N 1.465230 1.173055 -0.860249  
C 0.480845 2.003625 -0.431400  
O 0.167817 -2.127046 -0.185787  
C 2.766906 -0.698139 0.213358  
C 2.640656 -0.152694 1.642502  
C 4.104433 -0.317917 -0.453736  
O 0.517521 3.215615 -0.605684  
C -2.681921 -1.368217 -0.515854  
O -2.595992 -0.986237 -1.659883  
O -3.508226 -2.367711 -0.129286  
H -0.555786 1.695487 1.368440  
H -1.677413 -1.622104 1.335271  
H -4.070589 1.249754 0.003216  
H -3.538880 2.234265 1.355204  
H -2.139987 1.604648 -1.231571  
H -1.948443 3.028937 -0.204442  
H -3.772198 -0.352950 1.770883  
H -2.348257 0.460991 2.395620  
H 1.723725 -0.723031 -1.669715  
H 2.218020 1.646661 -1.346375  
H 2.704471 -1.793427 0.248699  
H 2.679611 0.943233 1.655036  
H 1.699254 -0.466532 2.107576  
H 3.451427 -0.521507 2.278027  
H 4.223054 0.775691 -0.449918  
H 4.070438 -0.623558 -1.509492  
H -3.956463 -2.680121 -0.937838  
C 5.337288 -0.954306 0.199244  
H 5.479984 -0.610226 1.229096  
H 6.245456 -0.701600 -0.359092  
H 5.251457 -2.047406 0.220023

2-SRSR\_c041

C -1.947499 -0.805250 0.728558  
C -0.649030 1.308432 0.179959  
C -3.050520 1.511167 0.962368  
C -2.032855 1.890607 -0.132136  
C -2.684107 0.174817 1.645815  
N -0.725746 -0.168799 0.155403  
C 0.284608 -0.974500 -0.237497  
C 1.588241 -0.357787 -0.726404  
N 1.424752 1.036302 -1.114073  
C 0.424713 1.882296 -0.748936  
O 0.194562 -2.214205 -0.214350  
C 2.737707 -0.607131 0.297230  
C 2.496201 0.116079 1.629018  
C 4.098361 -0.250449 -0.336245  
O 0.390501 3.054524 -1.095171  
C -2.867478 -1.372941 -0.383586  
O -3.991370 -0.968761 -0.575767  
O -2.339606 -2.371059 -1.103306  
H -0.354637 1.626236 1.192703  
H -1.592256 -1.662836 1.312145  
H -4.044366 1.437134 0.517312  
H -3.089596 2.296390 1.726515  
H -2.355329 1.502072 -1.105124  
H -1.928646 2.972354 -0.237029  
H -3.582197 -0.324175 2.019880  
H -2.040284 0.359093 2.514928  
H 1.834238 -0.929298 -1.629441  
H 2.132237 1.455316 -1.706063  
H 2.721706 -1.690470 0.476663  
H 2.495073 1.204396 1.495440  
H 1.539895 -0.176098 2.078091  
H 3.277720 -0.127667 2.354350  
H 4.155842 0.836126 -0.495045  
H 4.154193 -0.714465 -1.331440  
H -1.416397 -2.554531 -0.792304  
C 5.313623 -0.702715 0.482192  
H 5.369509 -0.194303 1.450351  
H 6.242832 -0.484992 -0.055442  
H 5.282934 -1.782546 0.670937

2-SRSR\_c045

C 2.255479 -0.302201 -0.255181  
C 0.756982 1.613047 -0.539932  
C 2.953297 1.904000 0.712600  
C 1.507646 2.403765 0.556963  
C 3.028375 0.376370 0.880800  
N 0.859356 0.168560 -0.278677  
C -0.074380 -0.504635 0.459802  
C -1.506696 0.031202 0.467527  
N -1.657828 1.286905 -0.258190  
C -0.672169 2.118432 -0.687577  
O 0.175615 -1.547333 1.056952  
C -2.466898 -1.070317 -0.068334  
C -2.153995 -1.444396 -1.524240  
C -3.953879 -0.694501 0.100021  
O -0.887835 3.226376 -1.161458  
C 2.393126 -1.823012 -0.260556  
O 3.165993 -2.442991 0.430421  
O 1.670436 -2.386273 -1.259205  
H 1.237961 1.807244 -1.506333  
H 2.683851 0.019596 -1.216945  
H 3.427036 2.401255 1.566816  
H 3.530594 2.196188 -0.176941  
H 0.965825 2.281022 1.505306  
H 1.479296 3.467390 0.300101  
H 2.592293 0.060421 1.835599  
H 4.066838 0.031828 0.874399  
H -1.743334 0.192624 1.528548  
H -2.590083 1.676881 -0.338146  
H -2.264427 -1.940951 0.567044  
H -2.298230 -0.589703 -2.195280  
H -1.123410 -1.796130 -1.637631  
H -2.820053 -2.247414 -1.859413  
H -4.544300 -1.530183 -0.297567  
H -4.202145 0.161270 -0.546057  
H 1.827036 -3.346569 -1.191104  
C -4.406385 -0.410259 1.537494  
H -4.155928 -1.244676 2.203502  
H -5.491434 -0.265239 1.579604

H -3.944769 0.493684 1.952554

2-SRSR\_c047

C 2.208651 -0.555089 -0.344124  
C 0.997043 1.566652 -0.504341  
C 3.309137 1.509056 0.560323  
C 1.947644 2.222099 0.524568  
C 3.165958 -0.014121 0.723191  
N 0.902095 0.119833 -0.252071  
C -0.060533 -0.415352 0.558539  
C -1.394374 0.324346 0.675438  
N -1.408015 1.604769 -0.021904  
C -0.345778 2.284835 -0.528084  
O 0.076759 -1.490612 1.134053  
C -2.546612 -0.611412 0.206831  
C -2.414966 -0.984211 -1.276683  
C -3.920684 -0.000748 0.553294  
O -0.428109 3.421702 -0.974631  
C 2.114975 -2.079248 -0.358988  
O 2.839329 -2.815677 0.267215  
O 1.236299 -2.516600 -1.293430  
H 1.418304 1.698724 -1.508476  
H 2.599838 -0.289917 -1.338339  
H 3.920902 1.919787 1.371722  
H 3.849093 1.721071 -0.374251  
H 1.473681 2.171917 1.514834  
H 2.058812 3.280640 0.269337  
H 2.766977 -0.272469 1.711048  
H 4.136147 -0.511499 0.630865  
H -1.536612 0.496249 1.753169  
H -2.272367 2.134355 -0.015441  
H -2.419044 -1.519375 0.808823  
H -2.494904 -0.097973 -1.917114  
H -1.453923 -1.466956 -1.482098  
H -3.202922 -1.683560 -1.573101  
H -4.127803 0.855340 -0.106110  
H -3.886064 0.396182 1.578335  
H 1.250160 -3.490154 -1.235925  
C -5.087124 -0.991515 0.454265  
H -5.226967 -1.359224 -0.567562

H -6.025256 -0.517900 0.763944  
H -4.920854 -1.859706 1.103130

2-SRSR\_c051

C -1.686874 -0.778025 0.816374  
C -0.519848 1.345131 0.056049  
C -2.786530 1.522678 1.170794  
C -1.946770 1.892922 -0.067428  
C -2.301183 0.205193 1.816639  
N -0.562508 -0.133434 0.076246  
C 0.396734 -0.930307 -0.444863  
C 1.615307 -0.297124 -1.107134  
N 1.348539 1.075593 -1.516855  
C 0.395427 1.914794 -1.031050  
O 0.315553 -2.170904 -0.407707  
C 2.919056 -0.426523 -0.252367  
C 3.406562 -1.881540 -0.186098  
C 2.778180 0.225922 1.136120  
O 0.286431 3.076523 -1.396648  
C -2.746292 -1.366787 -0.152312  
O -3.892654 -0.981588 -0.182942  
O -2.311037 -2.360600 -0.936561  
H -0.093471 1.696214 1.008717  
H -1.244413 -1.625827 1.352579  
H -3.833768 1.426688 0.878796  
H -2.725429 2.322674 1.918167  
H -2.397451 1.475566 -0.975256  
H -1.881137 2.973455 -0.209739  
H -3.126419 -0.300896 2.324919  
H -1.540847 0.415471 2.578930  
H 1.767918 -0.890542 -2.015957  
H 1.965949 1.494961 -2.203092  
H 3.668250 0.152920 -0.814924  
H 2.712172 -2.510391 0.378138  
H 3.498339 -2.312861 -1.189543  
H 4.391071 -1.936561 0.288460  
H 2.082965 -0.367778 1.746732  
H 2.327173 1.219429 1.017386  
H -1.350774 -2.529696 -0.757602  
C 4.102789 0.388002 1.891650

H 4.558746 -0.577118 2.134765  
H 3.946108 0.923407 2.834377  
H 4.827089 0.962291 1.301032

2-SRSR\_c056

C -1.681394 -0.770722 0.761934  
C -0.528389 1.413460 0.240500  
C -2.961562 1.439860 1.003002  
C -1.939353 1.959254 -0.035326  
C -2.472060 0.156030 1.703381  
N -0.543783 -0.056850 0.172822  
C 0.381345 -0.838654 -0.453408  
C 1.591574 -0.170967 -1.100206  
N 1.400849 1.262403 -1.285970  
C 0.484814 2.072433 -0.696278  
O 0.267290 -2.062615 -0.492339  
C 2.924700 -0.482479 -0.345467  
C 3.363130 -1.938627 -0.558095  
C 2.854987 -0.085928 1.142023  
O 0.464071 3.284539 -0.871040  
C -2.587846 -1.341445 -0.334303  
O -2.698494 -0.923733 -1.463622  
O -3.320031 -2.371933 0.148657  
H -0.221231 1.721695 1.252556  
H -1.296822 -1.626166 1.323181  
H -3.917766 1.252382 0.502326  
H -3.156440 2.201399 1.766811  
H -2.225447 1.633607 -1.039971  
H -1.883830 3.049640 -0.040802  
H -3.308152 -0.408185 2.127920  
H -1.811841 0.411163 2.540871  
H 1.662073 -0.631764 -2.093020  
H 2.067697 1.753560 -1.871481  
H 3.673283 0.167419 -0.826939  
H 2.648749 -2.634030 -0.109893  
H 3.428045 -2.176514 -1.626392  
H 4.351031 -2.115374 -0.120958  
H 2.192970 -0.786973 1.668980  
H 2.393026 0.906953 1.224635  
H -3.888615 -2.671095 -0.585838

C 4.217328 -0.046144 1.844917  
H 4.695665 -1.030953 1.868267  
H 4.109450 0.291155 2.881790  
H 4.902366 0.646721 1.340706

2-SRSR\_c073

C 2.218821 -0.289934 -0.312921  
C 0.716754 1.634185 -0.531712  
C 2.953389 1.899326 0.658420  
C 1.508147 2.412035 0.546161  
C 3.025907 0.368201 0.813981  
N 0.827642 0.189193 -0.285818  
C -0.071940 -0.478632 0.500642  
C -1.516593 0.015526 0.503853  
N -1.687417 1.299450 -0.167387  
C -0.717951 2.140078 -0.615536  
O 0.217064 -1.494724 1.125296  
C -2.428746 -1.092956 -0.102754  
C -2.060766 -1.408971 -1.559639  
C -3.928971 -0.758804 0.030604  
O -0.950487 3.259052 -1.054635  
C 2.264991 -1.816505 -0.428068  
O 1.668617 -2.447159 -1.270666  
O 3.155981 -2.370711 0.420851  
H 1.159792 1.838015 -1.514078  
H 2.623640 0.054801 -1.276254  
H 3.454024 2.387148 1.502766  
H 3.508900 2.193174 -0.244345  
H 0.992802 2.288594 1.509082  
H 1.482631 3.477563 0.297198  
H 2.613140 0.048847 1.777509  
H 4.066044 0.029335 0.778388  
H -1.781174 0.124714 1.563952  
H -2.622927 1.687009 -0.213684  
H -2.223886 -1.979952 0.509456  
H -2.197093 -0.531502 -2.202772  
H -1.023413 -1.745470 -1.654344  
H -2.705706 -2.206650 -1.944986  
H -4.485765 -1.596408 -0.409106  
H -4.176855 0.109667 -0.598237

H 3.132412 -3.329641 0.241510  
C -4.432568 -0.528288 1.460851  
H -4.179555 -1.374742 2.110592  
H -5.521991 -0.413346 1.473586  
H -4.008838 0.375110 1.916149

2-SRSR\_c075

C 1.873970 -0.839376 -0.486358  
C 1.123918 1.490000 -0.535946  
C 3.492512 0.939317 0.223084  
C 2.318324 1.923247 0.346593  
C 3.053696 -0.519129 0.437623  
N 0.758817 0.094227 -0.244102  
C -0.172378 -0.231720 0.705263  
C -1.307406 0.760075 0.968476  
N -1.121149 2.034606 0.282463  
C -0.027163 2.475387 -0.392212  
O -0.159681 -1.309034 1.294373  
C -2.703117 0.157736 0.601535  
C -3.161325 -0.892154 1.623251  
C -2.744022 -0.346562 -0.854245  
O 0.066089 3.605668 -0.853061  
C 1.468099 -2.311242 -0.458696  
O 2.106904 -3.186539 0.075338  
O 0.397887 -2.552734 -1.254341  
H 1.425404 1.538976 -1.589297  
H 2.180162 -0.655273 -1.527673  
H 4.277205 1.207447 0.939806  
H 3.938404 1.037020 -0.777666  
H 1.978026 1.969136 1.390561  
H 2.614594 2.935932 0.055466  
H 2.741135 -0.692274 1.473927  
H 3.876326 -1.210713 0.232666  
H -1.298978 0.930801 2.054737  
H -1.856355 2.726919 0.378874  
H -3.396255 1.012360 0.676950  
H -2.524362 -1.778898 1.590444  
H -3.121354 -0.491460 2.643372  
H -4.196125 -1.191508 1.428651  
H -2.122833 -1.247211 -0.940363

H -2.282082 0.410547 -1.500913  
H 0.229706 -3.511175 -1.186863  
C -4.156587 -0.640197 -1.372971  
H -4.637276 -1.455624 -0.821710  
H -4.127132 -0.931287 -2.428828  
H -4.802597 0.243274 -1.291518

2-SRSR\_c079

C -2.165934 -0.540657 0.399281  
C -0.956969 1.588775 0.507302  
C -3.299345 1.508471 -0.491216  
C -1.943309 2.233018 -0.495159  
C -3.153433 -0.016946 -0.652019  
N -0.869675 0.141973 0.261229  
C 0.052968 -0.387507 -0.600121  
C 1.403728 0.315974 -0.713845  
N 1.432841 1.615296 -0.051279  
C 0.386978 2.305471 0.474868  
O -0.130272 -1.438239 -1.207135  
C 2.521582 -0.638323 -0.196442  
C 2.337487 -0.989096 1.287032  
C 3.916525 -0.057788 -0.510189  
O 0.482937 3.450980 0.896335  
C -1.971152 -2.056187 0.505706  
O -1.217759 -2.585084 1.290579  
O -2.835078 -2.742929 -0.271165  
H -1.341652 1.729371 1.524778  
H -2.537022 -0.256230 1.395218  
H -3.935986 1.911380 -1.287370  
H -3.816076 1.719503 0.456638  
H -1.497485 2.183715 -1.498496  
H -2.057236 3.291527 -0.241064  
H -2.778871 -0.275474 -1.648897  
H -4.124054 -0.508649 -0.533122  
H 1.571532 0.457654 -1.791502  
H 2.299552 2.139977 -0.083366  
H 2.394018 -1.551778 -0.790679  
H 2.406006 -0.093567 1.916088  
H 1.367770 -1.463115 1.470296  
H 3.110393 -1.689724 1.617918

H 4.120761 0.799604 0.148185  
H 3.918498 0.330907 -1.539228  
H -2.651252 -3.686410 -0.102846  
C 5.060182 -1.069928 -0.370841  
H 5.162343 -1.432961 0.657020  
H 6.016068 -0.616588 -0.655874  
H 4.896053 -1.939505 -1.018398

2-SRSR\_c083

C 2.140117 -0.478115 -0.456731  
C 0.595953 1.513251 -0.239375  
C 3.067826 1.900646 -0.499267  
C 1.787214 2.382296 0.177967  
C 3.325946 0.446158 -0.107415  
N 0.847060 0.073807 0.003458  
C -0.200619 -0.814334 -0.006401  
C -1.589365 -0.319961 0.395728  
N -1.601380 1.084197 0.776226  
C -0.675912 2.022889 0.450847  
O -0.055696 -2.003079 -0.271927  
C -2.632741 -0.678373 -0.702413  
C -2.344830 0.044899 -2.025306  
C -4.082322 -0.424796 -0.241883  
O -0.832207 3.215057 0.680073  
C 2.459555 -1.845407 0.144017  
O 3.029882 -2.721471 -0.462806  
O 2.212531 -1.902199 1.475103  
H 0.440364 1.663619 -1.322513  
H 2.103376 -0.635812 -1.542470  
H 3.918055 2.524481 -0.200486  
H 2.974898 1.991227 -1.591301  
H 1.898458 2.338451 1.268745  
H 1.545064 3.416148 -0.078084  
H 3.504782 0.391211 0.973247  
H 4.213522 0.043798 -0.607464  
H -1.827409 -0.911565 1.288325  
H -2.437529 1.457223 1.210814  
H -2.507984 -1.756471 -0.862196  
H -3.064946 -0.260065 -2.792382  
H -2.422671 1.133035 -1.913985

H -1.344813 -0.193822 -2.405474  
H -4.741229 -0.669154 -1.085232  
H -4.232072 0.649982 -0.060326  
H 2.493717 -2.793138 1.755074  
C -4.533594 -1.229258 0.983589  
H -3.992125 -0.948439 1.895009  
H -4.381548 -2.304054 0.828512  
H -5.599127 -1.068522 1.180708

2-SRSR\_c105

C 2.145606 -0.462507 -0.401082  
C 0.584365 1.526449 -0.255760  
C 3.055819 1.922802 -0.497074  
C 1.765154 2.412251 0.155099  
C 3.318138 0.480688 -0.063805  
N 0.842764 0.094922 0.017088  
C -0.197086 -0.801821 0.005605  
C -1.590363 -0.316270 0.400914  
N -1.618694 1.096623 0.747502  
C -0.698057 2.037177 0.414036  
O -0.038272 -1.990087 -0.255618  
C -2.633849 -0.712132 -0.683601  
C -2.357152 -0.019126 -2.024942  
C -4.084315 -0.461561 -0.224324  
O -0.866700 3.232062 0.619182  
C 2.423131 -1.776965 0.332491  
O 2.325918 -1.940869 1.526242  
O 2.961690 -2.691410 -0.505943  
H 0.436977 1.656129 -1.342865  
H 2.125026 -0.666742 -1.479511  
H 3.898814 2.559206 -0.204242  
H 2.974476 1.986141 -1.591994  
H 1.865032 2.393302 1.247540  
H 1.519738 3.438537 -0.127043  
H 3.475741 0.452209 1.020952  
H 4.219306 0.075038 -0.537580  
H -1.816483 -0.889695 1.308554  
H -2.459000 1.469629 1.173889  
H -2.498679 -1.792509 -0.817139  
H -2.441881 1.070827 -1.939433

H -1.356937 -0.260433 -2.402881  
H -3.078356 -0.347360 -2.781391  
H -4.743847 -0.734934 -1.058279  
H -4.244360 0.616106 -0.070835  
H 3.171328 -3.468200 0.046011  
C -4.522574 -1.237555 1.024029  
H -4.361120 -2.314640 0.896741  
H -5.588693 -1.081503 1.221823  
H -3.979564 -0.928073 1.925141

2-SRSS\_c005

C -2.023567 -0.462353 0.556324  
C -0.415091 1.471970 0.298823  
C -2.756917 1.922140 1.100538  
C -1.600404 2.442261 0.250502  
C -3.186736 0.552356 0.577289  
N -0.808462 0.094708 -0.077873  
C 0.156792 -0.828530 -0.398162  
C 1.472526 -0.339177 -1.003019  
N 1.505119 1.103181 -1.190973  
C 0.729800 2.022645 -0.560961  
O -0.015722 -2.036099 -0.269804  
C 2.688663 -0.897527 -0.207475  
C 3.995125 -0.633669 -0.970561  
C 2.726874 -0.369143 1.239608  
O 0.921499 3.227816 -0.655983  
C -2.547366 -1.715707 -0.141346  
O -3.046423 -2.645369 0.448300  
O -2.570509 -1.591892 -1.490378  
H -0.041001 1.457683 1.338024  
H -1.788692 -0.773938 1.582405  
H -3.602908 2.618089 1.064728  
H -2.449280 1.849035 2.153812  
H -1.923404 2.561525 -0.791378  
H -1.240881 3.416773 0.588166  
H -3.573215 0.661660 -0.443238  
H -3.987745 0.120075 1.186637  
H 1.497717 -0.806385 -1.997027  
H 2.264173 1.498852 -1.733535  
H 2.520009 -1.980990 -0.171966

H 4.248354 0.434592 -0.984940  
H 4.835914 -1.157353 -0.506592  
H 3.927625 -0.982315 -2.008523  
H 1.747628 -0.548066 1.704957  
H 2.875331 0.719451 1.227177  
H -2.962093 -2.421260 -1.822103  
C 3.800457 -1.019631 2.120766  
H 3.691464 -2.110749 2.135828  
H 3.719256 -0.663488 3.153648  
H 4.813458 -0.787871 1.774809

2-SRSS\_c011

C 1.821005 -0.846511 -0.648255  
C 0.490347 1.279552 -0.360284  
C 2.890878 1.411661 -1.210670  
C 1.857112 1.962953 -0.199760  
C 2.506601 0.009643 -1.725908  
N 0.627772 -0.168530 -0.128208  
C -0.312305 -0.962260 0.461187  
C -1.568783 -0.308777 1.032362  
N -1.453005 1.139732 1.144802  
C -0.552886 1.952991 0.534723  
O -0.181266 -2.180215 0.549158  
C -2.835640 -0.780370 0.258538  
C -4.108168 -0.351652 1.004046  
C -2.824923 -0.322517 -1.212742  
O -0.575170 3.171635 0.655190  
C 2.830643 -1.254515 0.430508  
O 3.799798 -1.938462 0.188798  
O 2.560786 -0.769245 1.662078  
H 0.136358 1.447439 -1.390735  
H 1.498303 -1.795552 -1.086288  
H 3.877908 1.376313 -0.735716  
H 2.986741 2.087602 -2.068007  
H 2.195600 1.790719 0.827284  
H 1.710443 3.038696 -0.313892  
H 3.382974 -0.535294 -2.087030  
H 1.812880 0.093567 -2.570726  
H -1.645006 -0.717028 2.048122  
H -2.135536 1.631012 1.710399

H -2.775904 -1.876361 0.278747  
H -4.248824 0.736675 0.972574  
H -4.998831 -0.805367 0.559706  
H -4.075123 -0.660873 2.056004  
H -1.866398 -0.609954 -1.665837  
H -2.872117 0.774541 -1.251813  
H 3.263524 -1.117467 2.243484  
C -3.955442 -0.912158 -2.065156  
H -3.949601 -2.008255 -2.026726  
H -3.842339 -0.616291 -3.114024  
H -4.942255 -0.570482 -1.735010

2-SRSS\_c012

C -1.920932 -0.762547 0.733454  
C -0.477330 1.277110 0.235436  
C -2.741685 1.600570 1.341947  
C -1.832106 1.992100 0.162717  
C -2.462286 0.160304 1.827795  
N -0.685939 -0.185237 0.134947  
C 0.220826 -1.030195 -0.407781  
C 1.567882 -0.442067 -0.817911  
N 1.355891 0.901295 -1.349260  
C 0.479251 1.811361 -0.840866  
O -0.004024 -2.243097 -0.551764  
C 2.614874 -0.503928 0.342372  
C 2.816369 -1.946968 0.830419  
C 3.943152 0.142316 -0.104713  
O 0.449788 2.980290 -1.195264  
C -2.981999 -1.094924 -0.346274  
O -4.075100 -0.577481 -0.376281  
O -2.611706 -2.026575 -1.234228  
H -0.006057 1.505772 1.205466  
H -1.616022 -1.718752 1.175118  
H -3.784076 1.689709 1.029931  
H -2.589605 2.290869 2.180182  
H -2.306867 1.724148 -0.787798  
H -1.643540 3.067025 0.129801  
H -3.370388 -0.292218 2.235368  
H -1.722525 0.172691 2.637898  
H 1.924028 -1.072968 -1.638174

H 2.008413 1.270659 -2.029673  
H 2.212582 0.096436 1.173352  
H 3.249003 -2.568782 0.036697  
H 3.497996 -1.973091 1.685424  
H 1.877772 -2.416379 1.134667  
H 3.738962 1.144927 -0.499137  
H 4.361391 -0.444438 -0.936445  
H -1.689317 -2.330505 -1.035574  
C 4.991023 0.270677 1.007585  
H 4.592713 0.829943 1.863114  
H 5.872449 0.808832 0.642516  
H 5.329530 -0.704243 1.372688

2-SRSS\_c016

C -2.037478 -0.447581 0.500152  
C -0.410731 1.483635 0.317603  
C -2.759873 1.927820 1.099489  
C -1.589275 2.462295 0.277994  
C -3.190589 0.575913 0.532172  
N -0.807399 0.117802 -0.091782  
C 0.156559 -0.806413 -0.411861  
C 1.475316 -0.315965 -1.008139  
N 1.521737 1.130425 -1.160218  
C 0.746161 2.042817 -0.520463  
O -0.022242 -2.013983 -0.289371  
C 2.688475 -0.903802 -0.230286  
C 3.995977 -0.627661 -0.987273  
C 2.730683 -0.416200 1.230862  
O 0.947055 3.248294 -0.589332  
C -2.534387 -1.633449 -0.330232  
O -2.685017 -1.627604 -1.529647  
O -2.951831 -2.640162 0.470648  
H -0.046830 1.446529 1.359997  
H -1.822341 -0.803586 1.516118  
H -3.601147 2.629815 1.070069  
H -2.467251 1.825600 2.154658  
H -1.898204 2.609427 -0.764438  
H -1.228427 3.425768 0.644772  
H -3.551942 0.712122 -0.494053  
H -4.009524 0.137468 1.113784

H 1.492155 -0.759041 -2.013472  
H 2.284284 1.531756 -1.693551  
H 2.512797 -1.986706 -0.224432  
H 4.257154 0.438633 -0.971452  
H 4.833545 -1.170668 -0.539893  
H 3.924428 -0.945818 -2.034695  
H 1.752036 -0.607638 1.692348  
H 2.880148 0.672208 1.248853  
H -3.313664 -3.322638 -0.125416  
C 3.805500 -1.091999 2.091188  
H 3.697349 -2.183225 2.073624  
H 3.725348 -0.766984 3.134412  
H 4.817971 -0.849435 1.751155

2-SRSS\_c018

C -1.638895 -0.997675 0.706230  
C -0.850597 1.375038 0.347067  
C -3.302841 0.938602 0.916092  
C -2.313487 1.699773 -0.000176  
C -2.638178 -0.261963 1.616153  
N -0.612428 -0.071235 0.210778  
C 0.497747 -0.648781 -0.331706  
C 1.615873 0.252130 -0.850144  
N 1.176772 1.631372 -1.028763  
C 0.092111 2.242941 -0.487615  
O 0.616957 -1.870312 -0.404114  
C 2.911264 0.166126 0.018999  
C 2.639313 0.506079 1.490981  
C 3.632676 -1.183713 -0.166910  
O -0.132659 3.438599 -0.629800  
C -2.385747 -1.752078 -0.398681  
O -3.060614 -2.731474 -0.176543  
O -2.269146 -1.200862 -1.627544  
H -0.664056 1.673327 1.390988  
H -1.139147 -1.785696 1.276294  
H -4.155618 0.594406 0.320058  
H -3.712870 1.608198 1.680525  
H -2.473845 1.422534 -1.046803  
H -2.441126 2.781616 0.072256  
H -3.384045 -0.985670 1.957252

H -2.092628 0.072743 2.506348  
H 1.858886 -0.151893 -1.840514  
H 1.790090 2.257910 -1.538828  
H 3.571199 0.948609 -0.389741  
H 2.045327 -0.278999 1.974678  
H 3.574417 0.604677 2.050387  
H 2.102448 1.456374 1.589105  
H 3.710625 -1.390973 -1.243147  
H 3.012923 -1.986400 0.245872  
H -2.782949 -1.776554 -2.225445  
C 5.037186 -1.226796 0.446922  
H 5.670879 -0.419489 0.057520  
H 5.529868 -2.176634 0.211467  
H 5.014360 -1.134756 1.538375

2-SRSS\_c024

C -1.915483 -0.762339 0.660863  
C -0.463391 1.292701 0.376028  
C -2.844822 1.551385 1.266750  
C -1.804275 2.030051 0.230660  
C -2.562491 0.113274 1.748936  
N -0.667523 -0.155998 0.193964  
C 0.216898 -0.995241 -0.422190  
C 1.565664 -0.399741 -0.826042  
N 1.394289 0.999231 -1.207153  
C 0.556699 1.885576 -0.604696  
O -0.031354 -2.184289 -0.603156  
C 2.650826 -0.614541 0.281526  
C 2.852946 -2.108592 0.578588  
C 3.974038 0.071499 -0.119539  
O 0.597795 3.089969 -0.818087  
C -2.875181 -1.023494 -0.505031  
O -2.851909 -0.494873 -1.591775  
O -3.813549 -1.931271 -0.144689  
H -0.059233 1.482125 1.384670  
H -1.672954 -1.743361 1.077755  
H -3.843807 1.609736 0.820098  
H -2.857440 2.217617 2.137217  
H -2.167909 1.843209 -0.783951  
H -1.609834 3.100821 0.315778

H -3.475573 -0.376604 2.100126  
H -1.869389 0.130778 2.598560  
H 1.871795 -0.953679 -1.719327  
H 2.076055 1.423425 -1.824375  
H 2.280821 -0.120400 1.193969  
H 3.278872 -2.622348 -0.292832  
H 3.541168 -2.246652 1.417944  
H 1.913619 -2.608972 0.822265  
H 3.777960 1.124163 -0.355983  
H 4.349914 -0.393963 -1.043485  
H -4.395946 -2.044380 -0.919458  
C 5.066843 0.023274 0.955467  
H 4.711237 0.453869 1.899802  
H 5.942015 0.600910 0.638053  
H 5.403797 -0.998064 1.159231

2-SRSS\_c025

C -1.857472 -0.845259 0.534929  
C -0.906278 1.486271 0.313294  
C -3.322621 1.205624 0.952869  
C -2.325431 2.044164 0.157684  
C -3.273837 -0.237348 0.451979  
N -0.829601 0.050793 -0.040230  
C 0.387044 -0.538648 -0.285105  
C 1.529379 0.322797 -0.823714  
N 1.123826 1.702817 -1.052120  
C 0.072635 2.351400 -0.489052  
O 0.567222 -1.744327 -0.141798  
C 2.823297 0.238957 0.047509  
C 2.544699 0.573549 1.519861  
C 3.562201 -1.101768 -0.138874  
O -0.098174 3.558531 -0.598342  
C -1.927159 -2.207050 -0.153347  
O -2.150182 -3.239015 0.435168  
O -1.910750 -2.110283 -1.504924  
H -0.621278 1.600287 1.374193  
H -1.608743 -1.057955 1.582663  
H -4.336794 1.605779 0.840587  
H -3.081091 1.247005 2.024976  
H -2.596436 2.043836 -0.905682

H -2.304920 3.086571 0.483185  
H -3.604607 -0.266215 -0.593194  
H -3.943181 -0.887451 1.025741  
H 1.763274 -0.121187 -1.800661  
H 1.772781 2.309553 -1.541444  
H 3.477899 1.027578 -0.357716  
H 1.945038 -0.212982 1.993623  
H 3.476544 0.665152 2.085792  
H 2.012644 1.526684 1.620097  
H 3.628096 -1.315280 -1.215158  
H 2.962317 -1.909736 0.290874  
H -2.008321 -3.023421 -1.833268  
C 4.976891 -1.115612 0.452546  
H 5.592120 -0.303918 0.043137  
H 5.480171 -2.060934 0.221358  
H 4.969901 -1.010335 1.543037

2-SRSS\_c030

C -1.872057 -0.839170 0.480468  
C -0.914641 1.498011 0.322399  
C -3.339242 1.206447 0.922740  
C -2.331104 2.059741 0.157423  
C -3.283802 -0.225317 0.391135  
N -0.834101 0.068978 -0.051052  
C 0.385245 -0.519477 -0.282200  
C 1.529053 0.342583 -0.815633  
N 1.131125 1.729190 -1.017445  
C 0.075719 2.371937 -0.455907  
O 0.563046 -1.725006 -0.131886  
C 2.829833 0.238643 0.042568  
C 2.565087 0.551548 1.522262  
C 3.561121 -1.101886 -0.172069  
O -0.090020 3.581352 -0.546941  
C -1.916886 -2.137084 -0.330147  
O -1.985574 -2.201093 -1.535443  
O -2.051039 -3.209015 0.483828  
H -0.642427 1.597289 1.388270  
H -1.635783 -1.090499 1.522569  
H -4.351639 1.609279 0.803813  
H -3.112993 1.226576 1.998814

H -2.587588 2.078680 -0.909233  
H -2.314758 3.095893 0.502583  
H -3.589594 -0.232215 -0.661765  
H -3.968666 -0.884534 0.936671  
H 1.750511 -0.087573 -1.801887  
H 1.783244 2.340845 -1.496235  
H 3.484883 1.030544 -0.355474  
H 1.967777 -0.240948 1.988863  
H 3.501963 0.633433 2.081466  
H 2.035119 1.503816 1.640617  
H 3.615987 -1.298221 -1.252138  
H 2.961463 -1.913874 0.250163  
H -2.142783 -3.980973 -0.105772  
C 4.981031 -1.131182 0.406026  
H 5.595435 -0.314475 0.005458  
H 5.478973 -2.073916 0.153590  
H 4.984260 -1.044968 1.498246

2-SRSS\_c034

C -1.823889 -0.797403 0.721052  
C -0.503888 1.304457 0.184859  
C -2.827593 1.534125 1.164887  
C -1.887254 1.944302 0.014024  
C -2.451032 0.152391 1.745493  
N -0.632675 -0.165320 0.081533  
C 0.312710 -0.975966 -0.440943  
C 1.585753 -0.372421 -1.019460  
N 1.450191 1.052202 -1.288177  
C 0.515326 1.903235 -0.787803  
O 0.184076 -2.212099 -0.475136  
C 2.825250 -0.743635 -0.149603  
C 4.118096 -0.366349 -0.888357  
C 2.750751 -0.139515 1.266337  
O 0.499432 3.097162 -1.051814  
C -2.849704 -1.276410 -0.339620  
O -3.970508 -0.827976 -0.418004  
O -2.416963 -2.250032 -1.150496  
H -0.125664 1.552807 1.189097  
H -1.450663 -1.695385 1.227693  
H -3.855751 1.513179 0.799288

H -2.780203 2.276611 1.970243  
H -2.297255 1.618979 -0.949083  
H -1.754863 3.026625 -0.041195  
H -3.331481 -0.340027 2.167227  
H -1.732398 0.270849 2.565985  
H 1.709171 -0.883599 -1.982151  
H 2.120179 1.487666 -1.911189  
H 2.785470 -1.837374 -0.061138  
H 4.237884 0.722101 -0.961481  
H 4.997838 -0.755315 -0.367738  
H 4.130914 -0.780848 -1.903756  
H 1.781644 -0.399277 1.713890  
H 2.778416 0.956400 1.194927  
H -1.478011 -2.476981 -0.927655  
C 3.859644 -0.616997 2.212264  
H 3.874726 -1.711266 2.284449  
H 3.703065 -0.219705 3.221062  
H 4.851050 -0.288915 1.882847

2-SRSS\_c035

C 1.818155 -0.801837 -0.656796  
C 0.509276 1.339598 -0.385004  
C 2.972916 1.456892 -1.031740  
C 1.866741 2.002099 -0.096593  
C 2.594636 0.091947 -1.641207  
N 0.615584 -0.113785 -0.176325  
C -0.298073 -0.895211 0.465422  
C -1.561213 -0.247922 1.025961  
N -1.490322 1.206973 1.054098  
C -0.593669 2.014198 0.431699  
O -0.140087 -2.106947 0.595084  
C -2.824606 -0.794172 0.296499  
C -4.099129 -0.372165 1.042568  
C -2.849834 -0.403225 -1.193823  
O -0.657581 3.236310 0.484724  
C 2.705716 -1.219760 0.520414  
O 2.727751 -0.713362 1.618092  
O 3.531993 -2.226760 0.153219  
H 0.238897 1.530868 -1.435592  
H 1.510399 -1.723936 -1.156864

H 3.907882 1.367473 -0.467882  
H 3.169486 2.161404 -1.847917  
H 2.118457 1.791742 0.947374  
H 1.744226 3.082131 -0.199289  
H 3.482095 -0.450824 -1.980775  
H 1.960233 0.234430 -2.524129  
H -1.609683 -0.604201 2.063037  
H -2.203213 1.708423 1.571387  
H -2.729739 -1.885583 0.365375  
H -4.275748 0.708722 0.965661  
H -4.981356 -0.872351 0.632330  
H -4.041657 -0.633467 2.106344  
H -1.886465 -0.673615 -1.646816  
H -2.939132 0.688291 -1.281697  
H 4.081462 -2.428243 0.934094  
C -3.967407 -1.074182 -2.001895  
H -3.919254 -2.166296 -1.912259  
H -3.879032 -0.823984 -3.064961  
H -4.962361 -0.754792 -1.673817

2-SRSS\_c040

C 2.049471 -0.677219 -0.395050  
C 0.984358 1.515885 -0.616676  
C 3.373558 1.355881 0.244195  
C 2.068719 2.168752 0.271724  
C 3.139330 -0.136544 0.536740  
N 0.809446 0.103890 -0.241314  
C -0.102827 -0.288597 0.698892  
C -1.352818 0.573441 0.890805  
N -1.359266 1.771653 0.059950  
C -0.302872 2.329803 -0.588711  
O 0.011764 -1.325941 1.344556  
C -2.624082 -0.297590 0.673471  
C -3.884080 0.461162 1.119193  
C -2.721466 -0.829292 -0.770407  
O -0.349020 3.428869 -1.125627  
C 1.844805 -2.186089 -0.280279  
O 2.572063 -2.930911 0.332530  
O 0.848857 -2.617695 -1.091436  
H 1.322380 1.539174 -1.659837



H 2.362894 -0.517270 -1.438184  
H 4.085493 1.774039 0.965054  
H 3.838342 1.459064 -0.747359  
H 1.686616 2.227272 1.300551  
H 2.231280 3.194301 -0.074624  
H 2.818959 -0.292751 1.573401  
H 4.059227 -0.712230 0.396949  
H -1.341071 0.865487 1.952409  
H -2.180709 2.364547 0.096688  
H -2.483831 -1.152885 1.345262  
H -4.133295 1.285036 0.436869  
H -4.752446 -0.203744 1.142306  
H -3.765063 0.877243 2.127111  
H -1.772448 -1.312000 -1.034437  
H -2.842055 0.015715 -1.461432  
H 0.798324 -3.582772 -0.959600  
C -3.857044 -1.836919 -0.987767  
H -3.774333 -2.682642 -0.293930  
H -3.823671 -2.239570 -2.006228  
H -4.845486 -1.385428 -0.848397

2-SRSS\_c041

C -1.622824 -0.956828 0.708441  
C -0.787531 1.379511 0.229590  
C -3.242751 1.023287 0.827663  
C -2.244778 1.670650 -0.160777  
C -2.622126 -0.173903 1.576550  
N -0.551210 -0.075188 0.231458  
C 0.614670 -0.681027 -0.137182  
C 1.762925 0.194975 -0.629822  
N 1.300157 1.509370 -1.064552  
C 0.169933 2.155817 -0.679638  
O 0.761646 -1.900599 -0.079591  
C 2.935303 0.300161 0.397396  
C 2.498639 0.958943 1.713420  
C 3.647432 -1.041997 0.664612  
O -0.081027 3.307936 -1.010818  
C -2.357686 -1.714282 -0.403282  
O -3.173350 -2.578308 -0.171819  
O -2.035098 -1.322457 -1.655245

H -0.610159 1.774771 1.243031  
H -1.159345 -1.745798 1.307618  
H -4.133500 0.697679 0.278556  
H -3.586656 1.759696 1.562864  
H -2.400917 1.281304 -1.172069  
H -2.368137 2.754097 -0.211787  
H -3.391993 -0.868970 1.922481  
H -2.082749 0.173564 2.465507  
H 2.140994 -0.323909 -1.515792  
H 1.929199 2.071583 -1.627317  
H 3.665636 0.968659 -0.086408  
H 1.788086 0.325929 2.259257  
H 3.364841 1.114645 2.365682  
H 2.033626 1.936312 1.546191  
H 2.957352 -1.721982 1.175757  
H 4.464638 -0.833633 1.368740  
H -2.554000 -1.893065 -2.253821  
C 4.217991 -1.743085 -0.573173  
H 3.420987 -2.138844 -1.210244  
H 4.845723 -2.590694 -0.276718  
H 4.841202 -1.066530 -1.172878

2-SRSS\_c045

C -1.613234 -0.985047 0.723497  
C -0.825881 1.359978 0.137559  
C -3.218735 1.019533 0.898296  
C -2.303201 1.594230 -0.200591  
C -2.567552 -0.185163 1.613935  
N -0.554330 -0.094804 0.164292  
C 0.622950 -0.652550 -0.193788  
C 1.763033 0.247167 -0.652497  
N 1.264011 1.526285 -1.144133  
C 0.094266 2.134042 -0.812166  
O 0.807817 -1.882917 -0.164412  
C 2.886225 0.417847 0.421122  
C 2.379660 1.102270 1.698263  
C 3.627334 -0.893623 0.755423  
O -0.209526 3.250644 -1.207409  
C -2.361108 -1.757130 -0.394782  
O -3.545037 -1.624631 -0.604581

O -1.607284 -2.611595 -1.097960  
H -0.625738 1.772077 1.138879  
H -1.085619 -1.734789 1.324868  
H -4.166784 0.714807 0.451497  
H -3.440068 1.792363 1.643933  
H -2.514610 1.115687 -1.163783  
H -2.451214 2.667301 -0.337199  
H -3.333328 -0.869271 1.989547  
H -1.994187 0.156927 2.484336  
H 2.198924 -0.280497 -1.505879  
H 1.872460 2.079189 -1.737376  
H 3.613744 1.093707 -0.055518  
H 1.667796 0.465857 2.238736  
H 3.215716 1.303195 2.376602  
H 1.895095 2.060720 1.484624  
H 2.938818 -1.584418 1.255294  
H 4.402617 -0.640257 1.490855  
H -0.672247 -2.578001 -0.770873  
C 4.280032 -1.604783 -0.435307  
H 3.530810 -2.039895 -1.103841  
H 4.916771 -2.425261 -0.086979  
H 4.912791 -0.922433 -1.017721

2-SRSS\_c051

C -1.635473 -1.022182 0.694731  
C -0.814460 1.336859 0.237374  
C -3.135291 1.010799 1.196749  
C -2.306124 1.647628 0.064273  
C -2.468083 -0.273295 1.738846  
N -0.600158 -0.121420 0.108585  
C 0.511305 -0.684744 -0.414594  
C 1.636446 0.213610 -0.915422  
N 1.151027 1.553195 -1.221765  
C 0.046850 2.166977 -0.718688  
O 0.646285 -1.917819 -0.505142  
C 2.879991 0.229435 0.031223  
C 2.528477 0.706710 1.446802  
C 3.624396 -1.121588 0.017014  
O -0.239028 3.328790 -0.970818  
C -2.518892 -1.670256 -0.403972

O -3.711029 -1.480554 -0.483543  
O -1.872864 -2.485777 -1.246482  
H -0.509275 1.647832 1.248831  
H -1.083350 -1.837908 1.176168  
H -4.134219 0.778973 0.822974  
H -3.250200 1.722176 2.023166  
H -2.626770 1.259646 -0.909376  
H -2.422297 2.732807 0.031847  
H -3.221791 -0.963458 2.127533  
H -1.802225 -0.028547 2.575589  
H 1.952718 -0.247547 -1.858116  
H 1.726580 2.143534 -1.811893  
H 3.551670 0.978310 -0.417877  
H 1.999887 1.665861 1.427488  
H 1.901012 -0.025274 1.970690  
H 3.432112 0.851969 2.045782  
H 3.746977 -1.442541 -1.026308  
H 3.001861 -1.888181 0.491508  
H -0.909728 -2.510352 -1.013220  
C 5.002946 -1.074992 0.686535  
H 5.642742 -0.307257 0.233189  
H 5.514055 -2.037784 0.578163  
H 4.934711 -0.861558 1.758773

2-SRSS\_c058

C -1.627398 -0.908844 0.705938  
C -0.790373 1.428998 0.236811  
C -3.277487 1.054461 0.668426  
C -2.221020 1.706798 -0.253800  
C -2.689193 -0.113217 1.486337  
N -0.547236 -0.023656 0.260516  
C 0.594214 -0.643568 -0.154264  
C 1.761234 0.216477 -0.625729  
N 1.333359 1.558351 -1.006965  
C 0.215142 2.216318 -0.607202  
O 0.707783 -1.868542 -0.136358  
C 2.937862 0.254388 0.401814  
C 2.517557 0.870985 1.743265  
C 3.618636 -1.113516 0.615181  
O 0.003121 3.390877 -0.882245

C -2.251201 -1.647077 -0.483476  
O -2.234775 -1.292358 -1.639145  
O -2.891307 -2.762395 -0.060884  
H -0.681369 1.827670 1.257858  
H -1.194286 -1.677019 1.351781  
H -4.115236 0.699594 0.057927  
H -3.692824 1.793766 1.362922  
H -2.303592 1.301551 -1.266797  
H -2.350608 2.788949 -0.317436  
H -3.472771 -0.802613 1.815293  
H -2.207555 0.267431 2.395000  
H 2.122043 -0.280743 -1.531016  
H 1.985619 2.131778 -1.530799  
H 3.682922 0.923940 -0.057514  
H 1.794478 0.232517 2.265492  
H 3.388191 0.982991 2.398663  
H 2.072375 1.863459 1.615533  
H 2.912595 -1.796229 1.100123  
H 4.440869 -0.952431 1.325860  
H -3.281348 -3.171801 -0.856203  
C 4.172244 -1.778831 -0.649910  
H 3.366713 -2.127890 -1.303563  
H 4.777506 -2.653706 -0.387703  
H 4.813529 -1.094979 -1.221565

2-SRSS\_c062

C -1.647248 -0.967254 0.692178  
C -0.857323 1.404777 0.345831  
C -3.321866 0.968930 0.837593  
C -2.307628 1.710111 -0.066054  
C -2.680778 -0.230290 1.563972  
N -0.604589 -0.041299 0.237279  
C 0.493489 -0.622364 -0.324463  
C 1.618827 0.271173 -0.838403  
N 1.200920 1.660158 -0.986648  
C 0.111647 2.272863 -0.456717  
O 0.599337 -1.844693 -0.409818  
C 2.920525 0.152738 0.017777  
C 2.666222 0.475321 1.496822  
C 3.621367 -1.203756 -0.194815

O -0.098845 3.472906 -0.583121  
C -2.327288 -1.644649 -0.502551  
O -2.410234 -1.203859 -1.625492  
O -2.897757 -2.810911 -0.121160  
H -0.714687 1.714896 1.392869  
H -1.173002 -1.762808 1.272705  
H -4.164451 0.627930 0.226202  
H -3.739438 1.649425 1.588448  
H -2.427169 1.390577 -1.105621  
H -2.447011 2.792457 -0.030988  
H -3.439498 -0.948806 1.889169  
H -2.164222 0.107937 2.470113  
H 1.846276 -0.119864 -1.837799  
H 1.824166 2.287807 -1.483071  
H 3.588076 0.931732 -0.385348  
H 2.065456 -0.308227 1.974551  
H 3.607495 0.553536 2.049161  
H 2.142620 1.430969 1.612241  
H 3.684539 -1.396865 -1.274562  
H 2.995445 -2.003741 0.213722  
H -3.331712 -3.175571 -0.915488  
C 5.031713 -1.273927 0.402805  
H 5.671152 -0.468332 0.019304  
H 5.510090 -2.225861 0.147129  
H 5.021583 -1.198773 1.495739

2-SRSS\_c075

C -1.964789 -0.815800 0.625798  
C -0.572138 1.294394 0.319517  
C -2.971991 1.502314 1.119373  
C -1.938390 1.943182 0.066393  
C -2.686839 0.075301 1.639626  
N -0.694356 -0.174894 0.185203  
C 0.313185 -0.971896 -0.239135  
C 1.670163 -0.320217 -0.485234  
N 1.472263 1.027204 -1.009177  
C 0.498016 1.889158 -0.607049  
O 0.169079 -2.194602 -0.403674  
C 2.573243 -0.367341 0.788436  
C 2.820394 -1.810885 1.254985

C 3.896231 0.408283 0.581266  
O 0.468935 3.065269 -0.937542  
C -2.863147 -1.197364 -0.578084  
O -3.966888 -0.732512 -0.748945  
O -2.339250 -2.109566 -1.406810  
H -0.252181 1.533754 1.346941  
H -1.670548 -1.756687 1.105869  
H -3.969357 1.543418 0.677396  
H -2.961311 2.195281 1.969127  
H -2.271236 1.655054 -0.937164  
H -1.800091 3.026167 0.056132  
H -3.616419 -0.423192 1.927304  
H -2.059359 0.120181 2.538369  
H 2.136618 -0.919275 -1.272075  
H 2.200585 1.442471 -1.577602  
H 2.025679 0.158697 1.584908  
H 3.312941 -2.406925 0.478968  
H 3.465653 -1.812421 2.140718  
H 1.890247 -2.324736 1.509868  
H 4.435719 0.391918 1.537029  
H 3.667470 1.463726 0.387869  
H -1.435514 -2.367589 -1.091550  
C 4.823156 -0.121577 -0.521223  
H 5.129643 -1.156621 -0.337834  
H 5.733045 0.485681 -0.575332  
H 4.355492 -0.089089 -1.513369

#### 2-SRSS\_c077

C 2.008454 -0.642145 -0.440088  
C 0.924212 1.547552 -0.621456  
C 3.334150 1.390482 0.186386  
C 2.028355 2.200780 0.242526  
C 3.113958 -0.106229 0.479312  
N 0.772375 0.133418 -0.249816  
C -0.091457 -0.259818 0.736626  
C -1.372423 0.551743 0.924408  
N -1.402997 1.770301 0.123098  
C -0.370026 2.347944 -0.545717  
O 0.085304 -1.269116 1.411891  
C -2.604920 -0.363350 0.657944

C -3.902510 0.346101 1.075891  
C -2.640858 -0.881487 -0.793905  
O -0.440298 3.455136 -1.063337  
C 1.715409 -2.145033 -0.406229  
O 0.858893 -2.679911 -1.072086  
O 2.609834 -2.827511 0.339612  
H 1.229950 1.582206 -1.674119  
H 2.306058 -0.459298 -1.483448  
H 4.059371 1.808913 0.893828  
H 3.778926 1.496945 -0.813954  
H 1.669209 2.257039 1.279729  
H 2.182661 3.227289 -0.104728  
H 2.814693 -0.265660 1.521372  
H 4.040026 -0.667103 0.318854  
H -1.394522 0.819669 1.991398  
H -2.232496 2.349944 0.181370  
H -2.453752 -1.220929 1.325024  
H -4.159453 1.169335 0.395720  
H -4.747462 -0.348579 1.065272  
H -3.827444 0.753259 2.091861  
H -1.673999 -1.340396 -1.033551  
H -2.761258 -0.030933 -1.478575  
H 2.356777 -3.766913 0.263797  
C -3.743861 -1.913487 -1.059079  
H -3.661612 -2.765377 -0.372939  
H -3.664219 -2.303966 -2.079500  
H -4.747858 -1.488584 -0.948743

#### 2-SRSS\_c080

C 1.895426 -0.867126 -0.346821  
C 1.242383 1.495038 -0.377626  
C 3.389888 0.782768 0.799524  
C 2.248605 1.810261 0.755642  
C 2.867004 -0.663045 0.819739  
N 0.784564 0.099415 -0.273970  
C -0.342429 -0.247555 0.420800  
C -1.490613 0.757483 0.473416  
N -1.101837 2.093524 0.030571  
C 0.119399 2.523686 -0.379140  
O -0.489286 -1.357178 0.927515

C -2.727865 0.263870 -0.346764  
C -2.381474 0.041711 -1.825936  
C -3.431088 -0.971915 0.249767  
O 0.347329 3.681792 -0.705101  
C 1.442903 -2.316219 -0.511207  
O 1.926365 -3.254655 0.075877  
O 0.552823 -2.452842 -1.524529  
H 1.749473 1.606344 -1.343790  
H 2.418569 -0.630966 -1.286444  
H 4.021528 0.969455 1.675580  
H 4.032127 0.920716 -0.082711  
H 1.704568 1.804146 1.710473  
H 2.630440 2.824750 0.604686  
H 2.339782 -0.882046 1.755477  
H 3.689310 -1.380262 0.740025  
H -1.784116 0.810288 1.528570  
H -1.818194 2.811780 0.028740  
H -3.442815 1.101261 -0.285301  
H -1.690070 -0.799502 -1.948725  
H -3.289482 -0.183590 -2.396240  
H -1.919712 0.929128 -2.271254  
H -2.771247 -1.840250 0.159009  
H -4.306461 -1.171483 -0.383400  
H 0.340043 -3.403964 -1.563391  
C -3.889335 -0.833922 1.705823  
H -3.039423 -0.821459 2.395884  
H -4.521559 -1.682523 1.989690  
H -4.476538 0.080461 1.863501

#### 2-SRSS\_c084

C 1.891555 -0.982861 -0.375818  
C 1.396017 1.413215 -0.432280  
C 3.543175 0.590086 0.666007  
C 2.469164 1.689521 0.646977  
C 2.931262 -0.819351 0.737961  
N 0.850840 0.055940 -0.267794  
C -0.249655 -0.198874 0.505254  
C -1.305630 0.900616 0.638507  
N -0.880699 2.172428 0.062175  
C 0.342165 2.511223 -0.422797

O -0.443390 -1.291041 1.031933  
C -2.674194 0.469431 0.019457  
C -2.522649 0.035991 -1.445638  
C -3.407790 -0.567624 0.892640  
O 0.620014 3.637485 -0.814085  
C 1.340611 -2.403060 -0.483687  
O 1.792983 -3.358030 0.101766  
O 0.395021 -2.503595 -1.449477  
H 1.866813 1.462393 -1.421453  
H 2.379399 -0.799562 -1.345555  
H 4.222504 0.750838 1.510995  
H 4.154881 0.670164 -0.244637  
H 1.970269 1.741150 1.624887  
H 2.909452 2.672796 0.453714  
H 2.437880 -0.989852 1.701815  
H 3.702466 -1.588345 0.633590  
H -1.458281 1.028302 1.719968  
H -1.549174 2.935346 0.074477  
H -3.282707 1.389270 0.038240  
H -1.967282 -0.905266 -1.524078  
H -3.501523 -0.107442 -1.913030  
H -1.987985 0.794042 -2.027976  
H -3.369492 -0.233742 1.939139  
H -2.865299 -1.517143 0.861099  
H 0.122517 -3.440159 -1.455608  
C -4.874074 -0.777600 0.495982  
H -5.434505 0.166066 0.514836  
H -5.365000 -1.467563 1.191228  
H -4.972679 -1.202711 -0.508819

6-c01

C 1.874748 1.570511 -0.157148  
C 2.554405 -1.154675 0.185586  
C 3.180721 1.180260 0.106947  
C 0.866836 0.573711 -0.254961  
C 1.230713 -0.778729 -0.079570  
C 3.529289 -0.171951 0.278495  
C 0.219603 -1.843301 -0.170341  
O -1.082004 -1.436750 -0.438645  
C -1.433131 -0.123380 -0.620141

C -0.521253 0.869841 -0.527450  
C 1.542256 3.033077 -0.335736  
O 4.842804 -0.440480 0.533486  
O 0.421691 -3.028036 -0.032826  
C -2.904465 0.036805 -0.848244  
C -3.717032 -0.018070 0.469339  
O -3.364071 1.065757 1.323887  
C -5.214051 0.091853 0.213927  
H 2.783368 -2.209079 0.312244  
H 3.969608 1.922657 0.186758  
H -0.849517 1.890083 -0.684029  
H 2.435243 3.653243 -0.218803  
H 0.802279 3.373052 0.399478  
H 1.124966 3.234712 -1.330182  
H 4.956257 -1.399193 0.630641  
H -3.249077 -0.756440 -1.522465  
H -3.093834 1.003000 -1.328597  
H -3.502548 -0.978768 0.964773  
H -2.405598 1.018134 1.474905  
H -5.446804 1.033262 -0.296377  
H -5.756513 0.076485 1.164017  
H -5.567023 -0.740795 -0.403797

6-c02

C 2.170002 1.525461 -0.019332  
C 2.441214 -1.290596 -0.058524  
C 3.412089 0.921703 -0.159020  
C 1.016392 0.704729 0.107293  
C 1.178966 -0.697496 0.084895  
C 3.558324 -0.477684 -0.179434  
C 0.015660 -1.584341 0.203929  
O -1.217372 -0.958153 0.371546  
C -1.379178 0.409448 0.390970  
C -0.319738 1.233169 0.257648  
C 2.057784 3.031662 -0.003202  
O 4.826532 -0.960991 -0.322187  
O 0.025143 -2.793306 0.170635  
C -2.815052 0.803161 0.555994  
C -3.770903 0.169376 -0.488207  
O -3.984550 -1.210524 -0.231070

C -5.141450 0.836621 -0.457698  
H 2.512037 -2.374589 -0.072001  
H 4.308347 1.527494 -0.256911  
H -0.489745 2.302505 0.272625  
H 3.041009 3.497575 -0.112393  
H 1.619559 3.394400 0.934890  
H 1.423230 3.398669 -0.819528  
H 4.797350 -1.930828 -0.321178  
H -2.873826 1.895872 0.502539  
H -3.173785 0.499507 1.549607  
H -3.327328 0.310380 -1.489423  
H -3.114182 -1.636546 -0.159069  
H -5.579326 0.764105 0.544258  
H -5.812303 0.330550 -1.158377  
H -5.073714 1.893432 -0.738315

6-c03

C 1.998474 1.551244 -0.097572  
C 2.513166 -1.220037 0.137804  
C 3.280676 1.072904 0.134994  
C 0.928883 0.622789 -0.218852  
C 1.211634 -0.754748 -0.097206  
C 3.547139 -0.303492 0.253511  
C 0.136622 -1.750488 -0.213365  
O -1.136115 -1.255048 -0.457268  
C -1.409861 0.084818 -0.567359  
C -0.439838 1.014355 -0.459652  
C 1.753885 3.036970 -0.216472  
O 4.845620 -0.661834 0.482106  
O 0.266033 -2.950947 -0.120139  
C -2.867118 0.331082 -0.811346  
C -3.764222 -0.086138 0.364691  
O -3.398376 0.756633 1.459149  
C -5.248499 0.057168 0.025137  
H 2.677841 -2.290511 0.223965  
H 4.114379 1.762612 0.231682  
H -0.710219 2.059140 -0.544505  
H 2.686334 3.596541 -0.100516  
H 1.053115 3.393274 0.548752  
H 1.326670 3.299576 -1.192331

H 4.897735 -1.628614 0.544467  
H -3.181176 -0.227237 -1.703039  
H -3.021714 1.397194 -1.009531  
H -3.545356 -1.137166 0.606857  
H -3.876705 0.445374 2.243059  
H -5.482493 1.094131 -0.241084  
H -5.869575 -0.219970 0.886036  
H -5.531779 -0.593344 -0.810480

6-c04

C 2.109572 1.471973 -0.034318  
C 2.267257 -1.350483 0.084553  
C 3.320254 0.824571 0.170419  
C 0.930460 0.693286 -0.188325  
C 1.036173 -0.713037 -0.124214  
C 3.410090 -0.578444 0.230449  
C -0.156131 -1.557219 -0.267099  
O -1.356389 -0.889512 -0.498717  
C -1.461749 0.482868 -0.562311  
C -0.376591 1.268361 -0.407289  
C 2.058184 2.980526 -0.090930  
O 4.651544 -1.106417 0.436004  
O -0.194673 -2.764395 -0.201790  
C -2.871383 0.924569 -0.812860  
C -3.920776 0.365911 0.186161  
O -4.189838 -1.008926 -0.050222  
C -3.564437 0.633756 1.651478  
H 2.294113 -2.435667 0.127617  
H 4.235118 1.397744 0.290217  
H -0.503151 2.342608 -0.458154  
H 3.053435 3.410352 0.052089  
H 1.403109 3.392212 0.686926  
H 1.677194 3.336490 -1.056237  
H 4.584356 -2.074158 0.456217  
H -3.181355 0.602492 -1.816114  
H -2.892666 2.020069 -0.797156  
H -4.865105 0.874467 -0.042358  
H -3.341827 -1.482596 -0.013711  
H -2.636243 0.123522 1.934384  
H -4.365110 0.260810 2.297096

H -3.432557 1.705839 1.842685

6-c05

C -2.009285 1.549330 -0.090624  
C -2.503384 -1.227142 0.131392  
C -3.288697 1.060067 0.135126  
C -0.932577 0.629362 -0.210914  
C -1.205021 -0.750747 -0.096963  
C -3.545007 -0.318783 0.247255  
C -0.121684 -1.737910 -0.214256  
O 1.149271 -1.231852 -0.451664  
C 1.414076 0.110449 -0.560086  
C 0.434729 1.031665 -0.445371  
C -1.776690 3.037383 -0.205602  
O -4.840818 -0.687479 0.469850  
O -0.241971 -2.938808 -0.123515  
C 2.864711 0.374151 -0.817455  
C 3.805816 -0.114986 0.298034  
O 5.121935 0.105328 -0.214324  
C 3.596895 0.616406 1.623857  
H -2.660265 -2.299191 0.211844  
H -4.128232 1.742785 0.230407  
H 0.693662 2.079007 -0.537955  
H -2.714366 3.588727 -0.093214  
H -1.347302 3.305399 -1.178963  
H -1.083223 3.399346 0.563759  
H -4.887688 -1.654993 0.525361  
H 3.016268 1.448887 -0.965424  
H 3.168666 -0.130963 -1.743180  
H 3.631876 -1.191535 0.444671  
H 5.751874 -0.225410 0.444589  
H 3.768204 1.691593 1.496793  
H 4.297519 0.247206 2.383417  
H 2.582375 0.466161 2.008758

6-c06

C -1.773526 1.575499 -0.105005  
C -2.447912 -1.158679 0.164218  
C -3.070448 1.178021 0.188922  
C -0.770212 0.581868 -0.271974

C -1.132113 -0.775406 -0.131986  
C -3.416198 -0.179316 0.324412  
C -0.126755 -1.835586 -0.292109  
O 1.163430 -1.420494 -0.589155  
C 1.513212 -0.098620 -0.725617  
C 0.606171 0.888405 -0.579367  
C -1.442313 3.042597 -0.242441  
O -4.722354 -0.455704 0.614537  
O -0.326371 -3.025890 -0.189073  
C 2.975417 0.069089 -1.020541  
C 3.863022 0.302021 0.218365  
O 3.518399 1.597826 0.712622  
C 3.722370 -0.769854 1.298563  
H -2.674615 -2.216781 0.261494  
H -3.854492 1.918139 0.321652  
H 0.940755 1.912738 -0.678038  
H -2.329476 3.660424 -0.077096  
H -1.053801 3.276962 -1.241362  
H -0.678135 3.353429 0.480585  
H -4.832136 -1.417399 0.680703  
H 3.112753 0.930390 -1.682728  
H 3.331704 -0.821396 -1.549491  
H 4.905933 0.309109 -0.140816  
H 3.989597 1.730328 1.549719  
H 2.705409 -0.784537 1.702248  
H 4.416658 -0.572069 2.125702  
H 3.950726 -1.765478 0.903352

6-c07

C -1.814689 1.553124 -0.105697  
C -2.404415 -1.201171 0.163735  
C -3.098076 1.115833 0.192551  
C -0.783170 0.590250 -0.275224  
C -1.102607 -0.777526 -0.136684  
C -3.401703 -0.251280 0.329233  
C -0.067167 -1.807655 -0.307165  
O 1.212238 -1.353613 -0.607117  
C 1.521788 -0.024567 -0.746081  
C 0.584838 0.936792 -0.584856  
C -1.530059 3.029782 -0.246281

O -4.696412 -0.566652 0.624400  
O -0.230564 -3.002461 -0.209214  
C 2.976820 0.202988 -1.027921  
C 3.836774 0.396608 0.251700  
O 3.422154 1.559711 0.962647  
C 3.882553 -0.833389 1.158730  
H -2.599114 -2.265698 0.259393  
H -3.904022 1.831518 0.327366  
H 0.879530 1.970863 -0.714972  
H -2.436584 3.619211 -0.083610  
H -1.148372 3.274209 -1.245359  
H -0.778190 3.368592 0.477367  
H -4.779265 -1.531094 0.690892  
H 3.081608 1.109428 -1.632685  
H 3.365058 -0.640904 -1.609344  
H 4.853462 0.630152 -0.084206  
H 2.517479 1.391904 1.276637  
H 2.885397 -1.089520 1.535444  
H 4.531817 -0.633761 2.016850  
H 4.266539 -1.709502 0.624274

#### 6-c08

C 1.876240 1.556980 -0.160680  
C 2.547991 -1.172654 0.188116  
C 3.182954 1.158999 0.104864  
C 0.868150 0.565273 -0.255953  
C 1.229403 -0.790428 -0.077320  
C 3.528061 -0.192392 0.279298  
C 0.210683 -1.851311 -0.166777  
O -1.089907 -1.437463 -0.436574  
C -1.434676 -0.123061 -0.620060  
C -0.519117 0.866517 -0.528895  
C 1.551740 3.021077 -0.341699  
O 4.807780 -0.589412 0.539547  
O 0.403537 -3.035989 -0.027671  
C -2.905342 0.043729 -0.848350  
C -3.717668 -0.005882 0.469518  
O -3.358277 1.076865 1.323027  
C -5.214194 0.111834 0.214805  
H 2.794043 -2.219735 0.319872

H 3.961548 1.917466 0.179310  
H -0.843663 1.887711 -0.687118  
H 2.447141 3.638640 -0.226293  
H 0.813747 3.366418 0.392902  
H 1.135300 3.223458 -1.336271  
H 5.383967 0.189927 0.574904  
H -3.253586 -0.748864 -1.521463  
H -3.090500 1.010200 -1.329837  
H -3.507999 -0.967202 0.965673  
H -2.400040 1.023250 1.473622  
H -5.442252 1.054127 -0.296022  
H -5.756325 0.099855 1.165141  
H -5.571794 -0.719335 -0.402245

#### 6-c09

C -1.992772 1.550157 -0.119310  
C -2.513400 -1.216859 0.155915  
C -3.275891 1.077863 0.120736  
C -0.925689 0.617378 -0.226914  
C -1.211331 -0.757721 -0.086235  
C -3.545437 -0.296114 0.259437  
C -0.138967 -1.758013 -0.191368  
O 1.136831 -1.268855 -0.439444  
C 1.414078 0.068981 -0.574095  
C 0.444154 1.002011 -0.475556  
C -1.745980 3.033493 -0.262112  
O -4.843707 -0.647429 0.494044  
O -0.271239 -2.956240 -0.083940  
C 2.870460 0.306718 -0.823840  
C 3.796670 -0.090084 0.353790  
O 5.161400 0.046157 -0.041245  
C 3.610067 0.797586 1.576642  
H -2.680583 -2.285618 0.256647  
H -4.108175 1.770532 0.207260  
H 0.712767 2.044738 -0.590266  
H -2.677217 3.596201 -0.152676  
H -1.321243 3.280272 -1.243138  
H -1.043363 3.401684 0.495845  
H -4.900103 -1.613062 0.569898  
H 3.034880 1.363155 -1.061296

H 3.171252 -0.278753 -1.704999  
H 3.581075 -1.133997 0.626175  
H 5.339000 -0.613657 -0.729859  
H 3.841036 1.839518 1.326184  
H 4.287225 0.481155 2.375496  
H 2.581382 0.746398 1.946865

#### 6-c10

C 2.000072 1.537835 -0.100774  
C 2.506058 -1.238003 0.139466  
C 3.282281 1.051117 0.132845  
C 0.930470 0.614653 -0.219993  
C 1.210153 -0.766158 -0.095649  
C 3.545213 -0.324489 0.253707  
C 0.127446 -1.757451 -0.210620  
O -1.143568 -1.254355 -0.455734  
C -1.410696 0.086436 -0.567341  
C -0.436969 1.011790 -0.461190  
C 1.763915 3.024798 -0.221355  
O 4.802769 -0.807544 0.483185  
O 0.247308 -2.957380 -0.115955  
C -2.866934 0.339259 -0.811120  
C -3.765339 -0.074844 0.364964  
O -3.397431 0.767522 1.459260  
C -5.249239 0.072424 0.025431  
H 2.687585 -2.302490 0.230361  
H 4.106996 1.757303 0.225373  
H -0.703202 2.057570 -0.547237  
H 2.698766 3.581352 -0.106973  
H 1.065710 3.386178 0.543746  
H 1.337478 3.288768 -1.197101  
H 5.423279 -0.064485 0.539974  
H -3.183361 -0.217672 -1.702850  
H -3.017326 1.406055 -1.009025  
H -3.549273 -1.126249 0.607626  
H -3.872114 0.453856 2.244412  
H -5.480404 1.109924 -0.241237  
H -5.870997 -0.202568 0.886512  
H -5.534346 -0.577688 -0.809879

## 6-c11

C -2.169809 1.513613 0.017163  
 C -2.434263 -1.306041 0.058287  
 C -3.411875 0.902419 0.156726  
 C -1.017348 0.697344 -0.107873  
 C -1.177786 -0.707979 -0.084279  
 C -3.555712 -0.495845 0.178150  
 C -0.008117 -1.590782 -0.202041  
 O 1.223030 -0.958000 -0.370730  
 C 1.379355 0.409986 -0.390750  
 C 0.317486 1.230143 -0.258030  
 C -2.064907 3.020364 0.000426  
 O -4.771244 -1.101284 0.315280  
 O -0.009219 -2.798359 -0.167087  
 C 2.813815 0.809054 -0.555654  
 C 3.771748 0.177961 0.488321  
 O 3.990444 -1.200808 0.230311  
 C 5.139914 0.850186 0.458535  
 H -2.523724 -2.385866 0.074765  
 H -4.299767 1.526476 0.252447  
 H 0.484364 2.300001 -0.273507  
 H -3.049713 3.483837 0.109124  
 H -1.628176 3.384973 -0.937557  
 H -1.432308 3.390877 0.816590  
 H -5.460485 -0.423102 0.390015  
 H 2.868986 1.901971 -0.501902  
 H 3.173577 0.506712 -1.549298  
 H 3.327474 0.316816 1.489555  
 H 3.121599 -1.630069 0.158296  
 H 5.578250 0.779791 -0.543376  
 H 5.812423 0.346050 1.159026  
 H 5.068409 1.906612 0.739754

## 6-c12

C 2.109809 1.459776 -0.037255  
 C 2.259205 -1.365961 0.084520  
 C 3.319921 0.804469 0.167689  
 C 0.931566 0.686046 -0.189168  
 C 1.034329 -0.723308 -0.123405  
 C 3.406666 -0.597294 0.229297

C -0.164595 -1.562693 -0.264947  
 O -1.362449 -0.887999 -0.497475  
 C -1.461706 0.484560 -0.561808  
 C -0.373832 1.265942 -0.407810  
 C 2.066458 2.968581 -0.094852  
 O 4.590560 -1.245977 0.430353  
 O -0.212036 -2.768085 -0.198159  
 C -2.869624 0.932111 -0.811954  
 C -3.921001 0.376615 0.186786  
 O -4.195620 -0.996751 -0.050858  
 C -3.563219 0.641665 1.652302  
 H 2.304359 -2.447635 0.131623  
 H 4.227541 1.395770 0.284122  
 H -0.496732 2.340611 -0.459352  
 H 3.063492 3.395489 0.047063  
 H 1.414099 3.384355 0.683012  
 H 1.686668 3.326092 -1.059982  
 H 5.302992 -0.593633 0.516736  
 H -3.180916 0.611583 -1.815302  
 H -2.886873 2.027704 -0.795669  
 H -4.863337 0.889281 -0.040943  
 H -3.349447 -1.473878 -0.015259  
 H -2.637102 0.127322 1.934489  
 H -4.365248 0.271322 2.297736  
 H -3.427005 1.713068 1.844471

## 6-c13

C 2.088761 1.549354 0.034716  
 C 2.490075 -1.250922 0.060373  
 C 3.352803 1.003274 0.210409  
 C 0.979874 0.676210 -0.134463  
 C 1.206466 -0.716703 -0.118233  
 C 3.563207 -0.387899 0.224411  
 C 0.088561 -1.655628 -0.287581  
 O -1.166183 -1.091544 -0.475965  
 C -1.388086 0.262945 -0.488344  
 C -0.374380 1.139296 -0.326060  
 C 1.905788 3.048719 0.025121  
 O 4.847997 -0.813882 0.404194  
 O 0.166068 -2.863653 -0.277257

C -2.829708 0.612483 -0.696409  
 C -3.756271 0.331750 0.505108  
 O -4.949249 1.065072 0.212604  
 C -4.062217 -1.148589 0.725639  
 H 2.610999 -2.330598 0.065622  
 H 4.216110 1.649372 0.341699  
 H -0.596091 2.199050 -0.346891  
 H 2.862893 3.559598 0.162153  
 H 1.233703 3.379518 0.826806  
 H 1.474517 3.397209 -0.921534  
 H 4.862519 -1.783945 0.392545  
 H -3.219035 0.076715 -1.571708  
 H -2.898189 1.683402 -0.910906  
 H -3.277015 0.744348 1.409066  
 H -5.604601 0.839975 0.891314  
 H -4.550237 -1.568197 -0.161207  
 H -4.738653 -1.274693 1.581569  
 H -3.155234 -1.725430 0.924750

## 6-c14

C 1.568050 -1.633177 -0.023813  
 C 2.788477 0.918852 -0.023317  
 C 2.948727 -1.493929 -0.061017  
 C 0.759220 -0.464599 0.014291  
 C 1.392458 0.796376 0.014222  
 C 3.565334 -0.229219 -0.061207  
 C 0.593626 2.029473 0.055846  
 O -0.783591 1.869111 0.078343  
 C -1.397653 0.639135 0.079104  
 C -0.684357 -0.505006 0.056187  
 C 0.944485 -3.008797 -0.024756  
 O 4.930859 -0.209671 -0.099005  
 O 1.030244 3.159057 0.067193  
 C -2.892545 0.805689 0.118778  
 C -3.725090 -0.405636 -0.328975  
 O -3.523256 -1.547504 0.510405  
 C -5.212556 -0.059812 -0.423693  
 H 3.226576 1.913092 -0.021179  
 H 3.588151 -2.371601 -0.091066  
 H -1.218996 -1.444396 0.090525

H 1.713253 -3.786054 -0.056596  
H 0.286120 -3.153390 -0.890142  
H 0.335220 -3.177114 0.871734  
H 5.231276 0.712829 -0.094580  
H -3.144014 1.665034 -0.515915  
H -3.199049 1.099408 1.136533  
H -3.367528 -0.732766 -1.311819  
H -3.801269 -1.303573 1.408707  
H -5.596761 0.285140 0.545783  
H -5.781944 -0.945403 -0.721151  
H -5.394147 0.734747 -1.156217

6-c17

C -1.818504 1.538234 -0.110018  
C -2.396059 -1.221237 0.165678  
C -3.101782 1.091354 0.189190  
C -0.785456 0.581819 -0.276373  
C -1.100119 -0.789661 -0.134530  
C -3.399950 -0.275307 0.329031  
C -0.055645 -1.814485 -0.303609  
O 1.221849 -1.351360 -0.604764  
C 1.523083 -0.020942 -0.745659  
C 0.581110 0.935363 -0.586131  
C -1.544079 3.016634 -0.252914  
O -4.656662 -0.719749 0.623346  
O -0.208065 -3.009216 -0.204227  
C 2.976829 0.215302 -1.027595  
C 3.835440 0.413398 0.252208  
O 3.412033 1.572587 0.964742  
C 3.890062 -0.817426 1.157582  
H -2.606230 -2.279408 0.267736  
H -3.899208 1.822471 0.318349  
H 0.870508 1.970739 -0.717874  
H -2.453998 3.602108 -0.092690  
H -1.162834 3.262063 -1.251828  
H -0.795463 3.362093 0.470861  
H -5.253165 0.040231 0.708100  
H 3.076305 1.122542 -1.632090  
H 3.369926 -0.626180 -1.609230  
H 4.850425 0.654947 -0.083213

H 2.507849 1.397786 1.276393  
H 2.894698 -1.081918 1.533125  
H 4.537307 -0.614092 2.016368  
H 4.281064 -1.689764 0.622055

6-c18

C 2.040632 1.563716 0.032052  
C 2.501004 -1.227567 0.060079  
C 3.312937 1.044278 0.227709  
C 0.953584 0.667355 -0.156418  
C 1.209306 -0.720585 -0.138253  
C 3.552680 -0.342153 0.243015  
C 0.115080 -1.683442 -0.328007  
O -1.150397 -1.146713 -0.527573  
C -1.399080 0.203095 -0.545376  
C -0.406723 1.101502 -0.370621  
C 1.825836 3.058843 0.022487  
O 4.843080 -0.740924 0.443003  
O 0.220257 -2.889292 -0.325642  
C -2.848924 0.519368 -0.753113  
C -3.743839 0.402736 0.509279  
O -5.015835 0.992071 0.239512  
C -3.895754 -1.022332 1.037210  
H 2.644877 -2.304409 0.065505  
H 4.159936 1.708366 0.374540  
H -0.650600 2.156413 -0.398105  
H 2.769670 3.589556 0.175070  
H 1.134862 3.373369 0.814583  
H 1.401775 3.400317 -0.929973  
H 4.878440 -1.710463 0.431924  
H -3.249783 -0.140888 -1.534969  
H -2.936529 1.549358 -1.112466  
H -3.309288 1.037559 1.290172  
H -5.495386 0.388011 -0.350774  
H -4.331495 -1.675105 0.268451  
H -4.559414 -1.024625 1.907752  
H -2.934333 -1.457474 1.323636

6-c19

C 1.994613 1.552455 -0.101375

C 2.509721 -1.217719 0.142034  
C 3.276160 1.075531 0.138209  
C 0.926289 0.623299 -0.224610  
C 1.209298 -0.753763 -0.099629  
C 3.542771 -0.300277 0.261562  
C 0.136317 -1.751386 -0.223228  
O -1.137445 -1.256825 -0.468084  
C -1.411576 0.081392 -0.579379  
C -0.442557 1.012510 -0.470429  
C 1.750477 3.037935 -0.225254  
O 4.839875 -0.657264 0.497434  
O 0.268063 -2.951424 -0.137216  
C -2.869821 0.324066 -0.815429  
C -3.762656 -0.095426 0.375552  
O -3.398417 0.599301 1.565656  
C -5.247866 0.078228 0.056470  
H 2.674606 -2.287961 0.230332  
H 4.108987 1.765956 0.237058  
H -0.709910 2.057472 -0.566546  
H 2.682955 3.597630 -0.110541  
H 1.050191 3.397438 0.539124  
H 1.324116 3.297972 -1.202222  
H 4.892264 -1.623664 0.565650  
H -3.187846 -0.234600 -1.706413  
H -3.024064 1.389734 -1.029746  
H -3.558497 -1.146850 0.601570  
H -3.617704 1.536766 1.437115  
H -5.477017 1.125674 -0.184999  
H -5.852424 -0.212364 0.921027  
H -5.549291 -0.534585 -0.800687

6-c20

C -1.579848 -1.632397 -0.001873  
C -2.784631 0.925824 0.051623  
C -2.958587 -1.485986 0.064748  
C -0.764375 -0.468491 -0.042310  
C -1.390278 0.795967 -0.015870  
C -3.567508 -0.217836 0.092196  
C -0.585480 2.024801 -0.060832  
O 0.789725 1.856989 -0.116711



C 1.396977 0.624333 -0.143167  
C 0.677397 -0.515836 -0.113028  
C -0.964659 -3.011437 -0.032158  
O -4.932190 -0.190879 0.157828  
O -1.015748 3.156973 -0.047669  
C 2.892052 0.778746 -0.223674  
C 3.717929 -0.372209 0.355894  
O 3.539844 -1.500003 -0.510533  
C 5.198303 -0.002286 0.463314  
H -3.216609 1.922609 0.069121  
H -3.602522 -2.360333 0.096370  
H 1.208474 -1.456247 -0.166375  
H -1.737356 -3.784801 0.000677  
H -0.293538 -3.172971 0.820641  
H -0.371580 -3.168681 -0.941455  
H -5.226811 0.733445 0.166574  
H 3.152935 1.702571 0.305233  
H 3.193016 0.925815 -1.271164  
H 3.329610 -0.609819 1.359598  
H 4.058616 -2.234352 -0.146178  
H 5.598995 0.265623 -0.520526  
H 5.780999 -0.848353 0.849203  
H 5.348979 0.841689 1.145791

6-c22

C -2.004810 1.551274 -0.094972  
C -2.503900 -1.223535 0.134792  
C -3.284461 1.065243 0.136059  
C -0.930302 0.628860 -0.216614  
C -1.205384 -0.750425 -0.098816  
C -3.543328 -0.312803 0.252219  
C -0.124786 -1.740597 -0.218334  
O 1.147176 -1.237676 -0.458837  
C 1.413926 0.103512 -0.571913  
C 0.436940 1.027497 -0.456713  
C -1.769651 3.038584 -0.213974  
O -4.838916 -0.678136 0.479897  
O -0.248193 -2.940831 -0.127284  
C 2.867783 0.358060 -0.821920  
C 3.809876 -0.121563 0.310085

O 5.166674 -0.018378 -0.117504  
C 3.583334 0.610969 1.631596  
H -2.662570 -2.295116 0.217941  
H -4.122294 1.749875 0.232690  
H 0.697133 2.074261 -0.553453  
H -2.705570 3.592218 -0.098430  
H -1.344285 3.303822 -1.189927  
H -1.072069 3.400696 0.551636  
H -4.887909 -1.645381 0.538658  
H 3.012568 1.433959 -0.985046  
H 3.176618 -0.160036 -1.738459  
H 3.647668 -1.193950 0.455580  
H 5.385091 0.926458 -0.170871  
H 3.743923 1.691833 1.510711  
H 4.283648 0.243950 2.388039  
H 2.562701 0.467121 2.001793

6c27

C 2.046426 1.562646 0.034765  
C 2.500402 -1.229437 0.059935  
C 3.318090 1.040326 0.227147  
C 0.956916 0.668979 -0.151358  
C 1.209558 -0.719399 -0.135101  
C 3.554647 -0.346612 0.241245  
C 0.112606 -1.679729 -0.323894  
O -1.152078 -1.139884 -0.521291  
C -1.398186 0.209397 -0.535513  
C -0.403350 1.105536 -0.361026  
C 1.835377 3.058360 0.026001  
O 4.844423 -0.748477 0.438227  
O 0.215649 -2.885436 -0.322777  
C -2.848049 0.528772 -0.741402  
C -3.748682 0.375473 0.513630  
O -5.055637 0.871601 0.223580  
C -3.933041 -1.066007 0.967630  
H 2.641681 -2.306625 0.064070  
H 4.166982 1.702408 0.372092  
H -0.643639 2.161380 -0.386538  
H 2.781084 3.586743 0.175009  
H 1.148406 3.374807 0.820925

H 1.408826 3.400979 -0.924991  
H 4.877670 -1.718098 0.426470  
H -3.258140 -0.103903 -1.537815  
H -2.915420 1.569744 -1.082485  
H -3.294552 0.959378 1.331639  
H -4.981814 1.819476 0.030770  
H -4.382053 -1.659662 0.163954  
H -4.604416 -1.094531 1.831350  
H -2.979754 -1.524346 1.241288
